# Supplementary material for: Systematic lncRNA mapping to genome-wide co-essential modules uncovers cancer dependency on uncharacterized lncRNAs
Source: eLife. 2022 Jun 13;11:e77357. doi: 10.7554/eLife.77357 (PMC9191893; doi:10.7554/eLife.77357)
Supplement: Figure 1—source data 1. [file elife-77357-fig1-data1.xlsx]

## Sheet: Figure 1-source data 1
Figure 1-source data 1: lncRNA-mediated potential regulation of co-essential modules. Signed regression coefficients indicate direction of regulation. EG: essential genes.												Mitra et al.
Ensembl ID	Symbol	EG linked lncRNA types	Module numbers	Regression coefficients
ENSG00000128254	C22orf24	Inducers	755	0.205024
ENSG00000128254	C22orf24	Inducers	268	0.218894
ENSG00000128254	C22orf24	Inducers	518	0.214701
ENSG00000128254	C22orf24	Inducers	560	0.215011
ENSG00000128254	C22orf24	Inducers	505	0.223029
ENSG00000128254	C22orf24	Inducers	1569	0.218725
ENSG00000128254	C22orf24	Inducers	1399	0.220515
ENSG00000128254	C22orf24	Inducers	726	0.23593
ENSG00000128254	C22orf24	Inducers	2592	0.205281
ENSG00000128254	C22orf24	Inducers	1013	0.221728
ENSG00000128254	C22orf24	Inducers	354	0.185981
ENSG00000128254	C22orf24	Inducers	329	0.239358
ENSG00000128254	C22orf24	Inducers	403	0.202639
ENSG00000128254	C22orf24	Inducers	471	-0.0142502
ENSG00000128254	C22orf24	Inducers	474	0.244518
ENSG00000128254	C22orf24	Inducers	1498	0.228134
ENSG00000128254	C22orf24	Inducers	1639	0.235582
ENSG00000128254	C22orf24	Inducers	1448	0.229358
ENSG00000128254	C22orf24	Inducers	507	0.227373
ENSG00000163009	C2orf48	Inducers	1569	0.257968
ENSG00000163009	C2orf48	Inducers	492	-0.0609281
ENSG00000163009	C2orf48	Inducers	507	0.282948
ENSG00000163009	C2orf48	Inducers	505	0.306288
ENSG00000163009	C2orf48	Inducers	479	0.214195
ENSG00000163009	C2orf48	Inducers	1013	0.231926
ENSG00000163009	C2orf48	Inducers	354	0.301968
ENSG00000163009	C2orf48	Inducers	795	0.206662
ENSG00000163009	C2orf48	Inducers	1360	0.288359
ENSG00000163009	C2orf48	Inducers	471	-0.191576
ENSG00000163009	C2orf48	Inducers	595	0.233984
ENSG00000163009	C2orf48	Inducers	868	0.185132
ENSG00000163009	C2orf48	Inducers	1779	0.214955
ENSG00000163009	C2orf48	Inducers	197	0.228375
ENSG00000163009	C2orf48	Inducers	779	0.210261
ENSG00000163009	C2orf48	Inducers	518	0.319456
ENSG00000163009	C2orf48	Inducers	1503	0.216946
ENSG00000163009	C2orf48	Inducers	1781	-0.0564344
ENSG00000163009	C2orf48	Inducers	176	0.238009
ENSG00000163009	C2orf48	Inducers	755	0.307624
ENSG00000163009	C2orf48	Inducers	976	0.212443
ENSG00000163009	C2orf48	Inducers	474	0.33265
ENSG00000163009	C2orf48	Inducers	560	0.322733
ENSG00000163009	C2orf48	Inducers	223	0.188648
ENSG00000163009	C2orf48	Inducers	1448	0.368719
ENSG00000163009	C2orf48	Inducers	1639	0.259833
ENSG00000163009	C2orf48	Inducers	1105	0.207664
ENSG00000163009	C2orf48	Inducers	1765	0.207741
ENSG00000163009	C2orf48	Inducers	1674	0.186564
ENSG00000163009	C2orf48	Inducers	226	0.205299
ENSG00000163009	C2orf48	Inducers	280	0.230158
ENSG00000163009	C2orf48	Inducers	403	0.29081
ENSG00000163009	C2orf48	Inducers	283	0.239218
ENSG00000163009	C2orf48	Inducers	1498	0.303569
ENSG00000163009	C2orf48	Inducers	1496	0.328386
ENSG00000163009	C2orf48	Inducers	268	0.329802
ENSG00000163009	C2orf48	Inducers	2592	0.343928
ENSG00000163009	C2orf48	Inducers	726	0.302495
ENSG00000163009	C2orf48	Inducers	1500	0.233745
ENSG00000163009	C2orf48	Inducers	1580	0.204635
ENSG00000163009	C2orf48	Inducers	1399	0.331993
ENSG00000163009	C2orf48	Inducers	1501	0.188219
ENSG00000163009	C2orf48	Inducers	559	0.206558
ENSG00000163009	C2orf48	Inducers	329	0.299378
ENSG00000163009	C2orf48	Inducers	581	0.315526
ENSG00000163009	C2orf48	Inducers	1800	-0.0896989
ENSG00000163009	C2orf48	Inducers	1201	0.22021
ENSG00000163597	SNHG16	Inducers	868	0.170593
ENSG00000163597	SNHG16	Inducers	1325	0.163852
ENSG00000163597	SNHG16	Inducers	1870	0.173002
ENSG00000163597	SNHG16	Inducers	952	0.162269
ENSG00000163597	SNHG16	Inducers	836	0.1546
ENSG00000163597	SNHG16	Inducers	1526	0.215414
ENSG00000163597	SNHG16	Inducers	1105	0.204161
ENSG00000163597	SNHG16	Inducers	1036	0.163277
ENSG00000163597	SNHG16	Inducers	757	0.179316
ENSG00000163597	SNHG16	Inducers	1501	0.212887
ENSG00000163597	SNHG16	Inducers	1039	0.173081
ENSG00000163597	SNHG16	Inducers	1580	0.204595
ENSG00000163597	SNHG16	Inducers	935	0.223498
ENSG00000163597	SNHG16	Inducers	1779	0.222623
ENSG00000163597	SNHG16	Inducers	1528	0.227965
ENSG00000163597	SNHG16	Inducers	479	0.20613
ENSG00000163597	SNHG16	Inducers	779	0.15142
ENSG00000163597	SNHG16	Inducers	795	0.221624
ENSG00000163597	SNHG16	Inducers	1503	0.184507
ENSG00000163597	SNHG16	Inducers	1168	0.192801
ENSG00000163597	SNHG16	Inducers	1986	0.213033
ENSG00000163597	SNHG16	Inducers	715	0.161637
ENSG00000163597	SNHG16	Inducers	725	0.164651
ENSG00000163597	SNHG16	Inducers	559	0.225438
ENSG00000163597	SNHG16	Inducers	226	0.198387
ENSG00000163597	SNHG16	Inducers	1674	0.184184
ENSG00000163597	SNHG16	Inducers	584	0.194918
ENSG00000163597	SNHG16	Inducers	958	0.191771
ENSG00000163597	SNHG16	Inducers	197	0.216773
ENSG00000163597	SNHG16	Inducers	1303	0.189553
ENSG00000163597	SNHG16	Inducers	223	0.172076
ENSG00000163597	SNHG16	Inducers	1765	0.219779
ENSG00000163597	SNHG16	Inducers	1500	0.181733
ENSG00000163597	SNHG16	Inducers	2030	0.212008
ENSG00000163597	SNHG16	Inducers	367	0.200191
ENSG00000163597	SNHG16	Inducers	976	0.216315
ENSG00000175611	LINC00476	Inducers	1399	0.165413
ENSG00000175611	LINC00476	Inducers	471	-0.038834
ENSG00000176124	DLEU1	Inducers	176	0.173102
ENSG00000176124	DLEU1	Inducers	795	0.258895
ENSG00000176124	DLEU1	Inducers	492	-0.126795
ENSG00000176124	DLEU1	Inducers	1870	0.182093
ENSG00000176124	DLEU1	Inducers	1325	0.220802
ENSG00000176124	DLEU1	Inducers	1503	0.191731
ENSG00000176124	DLEU1	Inducers	935	0.206087
ENSG00000176124	DLEU1	Inducers	559	0.204772
ENSG00000176124	DLEU1	Inducers	725	0.168097
ENSG00000176124	DLEU1	Inducers	197	0.186784
ENSG00000176124	DLEU1	Inducers	560	0.177059
ENSG00000176124	DLEU1	Inducers	1779	0.194206
ENSG00000176124	DLEU1	Inducers	1424	0.238469
ENSG00000176124	DLEU1	Inducers	976	0.233224
ENSG00000176124	DLEU1	Inducers	715	0.201662
ENSG00000176124	DLEU1	Inducers	1501	0.190961
ENSG00000176124	DLEU1	Inducers	1399	0.187759
ENSG00000176124	DLEU1	Inducers	755	0.216062
ENSG00000176124	DLEU1	Inducers	268	0.184981
ENSG00000176124	DLEU1	Inducers	544	0.203934
ENSG00000176124	DLEU1	Inducers	757	0.210466
ENSG00000176124	DLEU1	Inducers	868	0.185732
ENSG00000176124	DLEU1	Inducers	1448	0.202104
ENSG00000176124	DLEU1	Inducers	1800	-0.134213
ENSG00000176124	DLEU1	Inducers	1528	0.259726
ENSG00000176124	DLEU1	Inducers	1105	0.190786
ENSG00000176124	DLEU1	Inducers	1580	0.196154
ENSG00000176124	DLEU1	Inducers	1526	0.233149
ENSG00000176124	DLEU1	Inducers	1765	0.191371
ENSG00000176124	DLEU1	Inducers	1168	0.200868
ENSG00000176124	DLEU1	Inducers	584	0.187531
ENSG00000176124	DLEU1	Inducers	1674	0.179064
ENSG00000176124	DLEU1	Inducers	779	0.184389
ENSG00000176124	DLEU1	Inducers	518	0.174474
ENSG00000176124	DLEU1	Inducers	836	0.19387
ENSG00000176124	DLEU1	Inducers	1036	0.178304
ENSG00000176124	DLEU1	Inducers	479	0.184736
ENSG00000176124	DLEU1	Inducers	952	0.209218
ENSG00000176124	DLEU1	Inducers	1986	0.207006
ENSG00000176124	DLEU1	Inducers	958	0.193878
ENSG00000176124	DLEU1	Inducers	2030	0.234438
ENSG00000176124	DLEU1	Inducers	1423	0.216213
ENSG00000176124	DLEU1	Inducers	223	0.180053
ENSG00000176124	DLEU1	Inducers	1496	0.207283
ENSG00000176124	DLEU1	Inducers	1683	0.241591
ENSG00000176124	DLEU1	Inducers	471	-0.119152
ENSG00000176124	DLEU1	Inducers	367	0.21949
ENSG00000176124	DLEU1	Inducers	226	0.188687
ENSG00000176349	AC104129.1	Inducers	176	0.173472
ENSG00000176349	AC104129.1	Inducers	595	0.189082
ENSG00000176349	AC104129.1	Inducers	492	-0.0354302
ENSG00000176349	AC104129.1	Inducers	726	0.201458
ENSG00000176349	AC104129.1	Inducers	507	0.183029
ENSG00000176349	AC104129.1	Inducers	268	0.202605
ENSG00000176349	AC104129.1	Inducers	329	0.220289
ENSG00000176349	AC104129.1	Inducers	518	0.191247
ENSG00000176349	AC104129.1	Inducers	560	0.198165
ENSG00000176349	AC104129.1	Inducers	471	-0.131259
ENSG00000176349	AC104129.1	Inducers	354	0.206488
ENSG00000176349	AC104129.1	Inducers	1496	0.181813
ENSG00000176349	AC104129.1	Inducers	403	0.189195
ENSG00000176349	AC104129.1	Inducers	1696	-0.0738482
ENSG00000176349	AC104129.1	Inducers	1498	0.189647
ENSG00000176349	AC104129.1	Inducers	2592	0.215114
ENSG00000176349	AC104129.1	Inducers	1800	-0.0738482
ENSG00000176349	AC104129.1	Inducers	505	0.196279
ENSG00000176349	AC104129.1	Inducers	1399	0.197831
ENSG00000176349	AC104129.1	Inducers	755	0.178164
ENSG00000176349	AC104129.1	Inducers	474	0.207507
ENSG00000176912	TYMSOS	Inducers	1360	0.206759
ENSG00000176912	TYMSOS	Inducers	726	0.211967
ENSG00000176912	TYMSOS	Inducers	1496	0.237831
ENSG00000176912	TYMSOS	Inducers	354	0.186416
ENSG00000176912	TYMSOS	Inducers	280	0.203326
ENSG00000176912	TYMSOS	Inducers	755	0.230749
ENSG00000176912	TYMSOS	Inducers	1448	0.280817
ENSG00000176912	TYMSOS	Inducers	1498	0.222259
ENSG00000176912	TYMSOS	Inducers	1399	0.253709
ENSG00000176912	TYMSOS	Inducers	1800	-0.135369
ENSG00000176912	TYMSOS	Inducers	1424	0.204588
ENSG00000176912	TYMSOS	Inducers	507	0.212921
ENSG00000176912	TYMSOS	Inducers	492	-0.124314
ENSG00000176912	TYMSOS	Inducers	505	0.209359
ENSG00000176912	TYMSOS	Inducers	268	0.249566
ENSG00000176912	TYMSOS	Inducers	581	0.221286
ENSG00000176912	TYMSOS	Inducers	2014	-0.174207
ENSG00000176912	TYMSOS	Inducers	474	0.224991
ENSG00000176912	TYMSOS	Inducers	560	0.250033
ENSG00000176912	TYMSOS	Inducers	176	0.193952
ENSG00000176912	TYMSOS	Inducers	471	-0.121251
ENSG00000176912	TYMSOS	Inducers	518	0.24995
ENSG00000176912	TYMSOS	Inducers	1696	-0.124314
ENSG00000176912	TYMSOS	Inducers	779	0.18573
ENSG00000176912	TYMSOS	Inducers	403	0.217198
ENSG00000177340	FLJ13224	Inducers	958	0.206468
ENSG00000177340	FLJ13224	Inducers	1696	-0.0939478
ENSG00000177340	FLJ13224	Inducers	1498	0.217409
ENSG00000177340	FLJ13224	Inducers	1526	0.200866
ENSG00000177340	FLJ13224	Inducers	976	0.192804
ENSG00000177340	FLJ13224	Inducers	176	0.177192
ENSG00000177340	FLJ13224	Inducers	595	0.199967
ENSG00000177340	FLJ13224	Inducers	280	0.18936
ENSG00000177340	FLJ13224	Inducers	471	-0.110826
ENSG00000177340	FLJ13224	Inducers	726	0.217178
ENSG00000177340	FLJ13224	Inducers	354	0.175204
ENSG00000177340	FLJ13224	Inducers	505	0.207504
ENSG00000177340	FLJ13224	Inducers	474	0.22031
ENSG00000177340	FLJ13224	Inducers	1639	0.213381
ENSG00000177340	FLJ13224	Inducers	492	-0.081957
ENSG00000177340	FLJ13224	Inducers	367	0.187698
ENSG00000177340	FLJ13224	Inducers	795	0.203725
ENSG00000177340	FLJ13224	Inducers	1800	-0.0974398
ENSG00000178440	LINC00843	Inducers	518	0.286005
ENSG00000178440	LINC00843	Inducers	268	0.289749
ENSG00000178440	LINC00843	Inducers	1639	0.283361
ENSG00000178440	LINC00843	Inducers	176	0.251829
ENSG00000178440	LINC00843	Inducers	403	0.330692
ENSG00000178440	LINC00843	Inducers	1448	0.250642
ENSG00000178440	LINC00843	Inducers	1569	0.259147
ENSG00000178440	LINC00843	Inducers	2592	0.319055
ENSG00000178440	LINC00843	Inducers	354	0.293547
ENSG00000178440	LINC00843	Inducers	507	0.255036
ENSG00000178440	LINC00843	Inducers	2014	-0.103664
ENSG00000178440	LINC00843	Inducers	505	0.32519
ENSG00000178440	LINC00843	Inducers	1696	-0.0133635
ENSG00000178440	LINC00843	Inducers	726	0.33403
ENSG00000178440	LINC00843	Inducers	1399	0.293553
ENSG00000178440	LINC00843	Inducers	471	-0.133457
ENSG00000178440	LINC00843	Inducers	755	0.232676
ENSG00000178440	LINC00843	Inducers	367	0.250694
ENSG00000178440	LINC00843	Inducers	1498	0.318742
ENSG00000178440	LINC00843	Inducers	329	0.372716
ENSG00000178440	LINC00843	Inducers	560	0.288595
ENSG00000178440	LINC00843	Inducers	1800	-0.0258262
ENSG00000178440	LINC00843	Inducers	474	0.379227
ENSG00000180846	CSNK1G2-AS1	Inducers	474	0.259468
ENSG00000180846	CSNK1G2-AS1	Inducers	2592	0.232601
ENSG00000180846	CSNK1G2-AS1	Inducers	726	0.241996
ENSG00000180846	CSNK1G2-AS1	Inducers	1399	0.218799
ENSG00000180846	CSNK1G2-AS1	Inducers	471	-0.108148
ENSG00000180846	CSNK1G2-AS1	Inducers	403	0.25753
ENSG00000180846	CSNK1G2-AS1	Inducers	280	0.227053
ENSG00000180846	CSNK1G2-AS1	Inducers	1639	0.231349
ENSG00000180846	CSNK1G2-AS1	Inducers	1498	0.230391
ENSG00000180846	CSNK1G2-AS1	Inducers	958	0.212237
ENSG00000180846	CSNK1G2-AS1	Inducers	329	0.265162
ENSG00000180846	CSNK1G2-AS1	Inducers	268	0.225264
ENSG00000180846	CSNK1G2-AS1	Inducers	1619	0.227829
ENSG00000180846	CSNK1G2-AS1	Inducers	367	0.214267
ENSG00000180846	CSNK1G2-AS1	Inducers	354	0.222674
ENSG00000180846	CSNK1G2-AS1	Inducers	507	0.218419
ENSG00000180846	CSNK1G2-AS1	Inducers	1526	0.20386
ENSG00000180846	CSNK1G2-AS1	Inducers	505	0.234406
ENSG00000180846	CSNK1G2-AS1	Inducers	595	0.234354
ENSG00000180846	CSNK1G2-AS1	Inducers	518	0.218387
ENSG00000180846	CSNK1G2-AS1	Inducers	1448	0.218462
ENSG00000180846	CSNK1G2-AS1	Inducers	560	0.222668
ENSG00000183308	AC005037.1	Inducers	559	0.137155
ENSG00000183308	AC005037.1	Inducers	1528	0.151784
ENSG00000186615	KTN1-AS1	Inducers	976	0.151189
ENSG00000186615	KTN1-AS1	Inducers	1779	0.153947
ENSG00000186615	KTN1-AS1	Inducers	795	0.164842
ENSG00000186615	KTN1-AS1	Inducers	367	0.164831
ENSG00000186615	KTN1-AS1	Inducers	559	0.150371
ENSG00000186615	KTN1-AS1	Inducers	1683	0.178284
ENSG00000186615	KTN1-AS1	Inducers	584	0.173465
ENSG00000187904	AC097382.1	Inducers	268	0.172349
ENSG00000187904	AC097382.1	Inducers	492	-0.0190933
ENSG00000187904	AC097382.1	Inducers	1696	-0.0502234
ENSG00000187904	AC097382.1	Inducers	354	0.186714
ENSG00000187904	AC097382.1	Inducers	1399	0.172925
ENSG00000187904	AC097382.1	Inducers	474	0.211336
ENSG00000187904	AC097382.1	Inducers	505	0.185243
ENSG00000187904	AC097382.1	Inducers	1800	-0.0344525
ENSG00000187904	AC097382.1	Inducers	2014	-0.111295
ENSG00000187904	AC097382.1	Inducers	471	-0.112874
ENSG00000187904	AC097382.1	Inducers	1201	0.19389
ENSG00000187904	AC097382.1	Inducers	726	0.190442
ENSG00000188511	C22orf34	Inducers	518	0.198156
ENSG00000188511	C22orf34	Inducers	1639	0.217331
ENSG00000188511	C22orf34	Inducers	403	0.21683
ENSG00000188511	C22orf34	Inducers	1569	0.209799
ENSG00000188511	C22orf34	Inducers	268	0.214128
ENSG00000188511	C22orf34	Inducers	584	0.193371
ENSG00000188511	C22orf34	Inducers	976	0.222496
ENSG00000188511	C22orf34	Inducers	280	0.187167
ENSG00000188511	C22orf34	Inducers	367	0.192056
ENSG00000188511	C22orf34	Inducers	226	0.182389
ENSG00000188511	C22orf34	Inducers	354	0.186508
ENSG00000188511	C22orf34	Inducers	1619	0.18927
ENSG00000188511	C22orf34	Inducers	1580	0.19967
ENSG00000188511	C22orf34	Inducers	2014	-0.135834
ENSG00000188511	C22orf34	Inducers	935	0.191404
ENSG00000188511	C22orf34	Inducers	595	0.189431
ENSG00000188511	C22orf34	Inducers	1800	-0.0847558
ENSG00000188511	C22orf34	Inducers	505	0.186181
ENSG00000188511	C22orf34	Inducers	559	0.238421
ENSG00000188511	C22orf34	Inducers	1779	0.230943
ENSG00000188511	C22orf34	Inducers	507	0.187652
ENSG00000188511	C22orf34	Inducers	223	0.155759
ENSG00000188511	C22orf34	Inducers	197	0.172967
ENSG00000188511	C22orf34	Inducers	560	0.199798
ENSG00000188511	C22orf34	Inducers	1986	0.224364
ENSG00000188511	C22orf34	Inducers	1765	0.195155
ENSG00000188511	C22orf34	Inducers	1448	0.263687
ENSG00000188511	C22orf34	Inducers	176	0.169614
ENSG00000188511	C22orf34	Inducers	726	0.226625
ENSG00000188511	C22orf34	Inducers	1498	0.205982
ENSG00000188511	C22orf34	Inducers	1496	0.253302
ENSG00000188511	C22orf34	Inducers	779	0.16565
ENSG00000188511	C22orf34	Inducers	474	0.220981
ENSG00000188511	C22orf34	Inducers	1105	0.18292
ENSG00000188511	C22orf34	Inducers	1526	0.19791
ENSG00000188511	C22orf34	Inducers	1503	0.176472
ENSG00000188511	C22orf34	Inducers	1528	0.218296
ENSG00000188511	C22orf34	Inducers	755	0.195524
ENSG00000188511	C22orf34	Inducers	471	-0.189441
ENSG00000188511	C22orf34	Inducers	795	0.220858
ENSG00000188511	C22orf34	Inducers	479	0.192603
ENSG00000188511	C22orf34	Inducers	1501	0.15757
ENSG00000188511	C22orf34	Inducers	1399	0.21185
ENSG00000196756	SNHG17	Inducers	1500	0.2255
ENSG00000196756	SNHG17	Inducers	559	0.257649
ENSG00000196756	SNHG17	Inducers	1779	0.236147
ENSG00000196756	SNHG17	Inducers	518	0.178708
ENSG00000196756	SNHG17	Inducers	1870	0.163903
ENSG00000196756	SNHG17	Inducers	560	0.179536
ENSG00000196756	SNHG17	Inducers	1501	0.18865
ENSG00000196756	SNHG17	Inducers	1303	0.186123
ENSG00000196756	SNHG17	Inducers	544	0.198116
ENSG00000196756	SNHG17	Inducers	952	0.183027
ENSG00000196756	SNHG17	Inducers	868	0.172522
ENSG00000196756	SNHG17	Inducers	755	0.191781
ENSG00000196756	SNHG17	Inducers	1168	0.215771
ENSG00000196756	SNHG17	Inducers	1325	0.19028
ENSG00000196756	SNHG17	Inducers	492	-0.10885
ENSG00000196756	SNHG17	Inducers	1105	0.217922
ENSG00000196756	SNHG17	Inducers	1526	0.2583
ENSG00000196756	SNHG17	Inducers	795	0.275441
ENSG00000196756	SNHG17	Inducers	757	0.184079
ENSG00000196756	SNHG17	Inducers	1800	-0.10885
ENSG00000196756	SNHG17	Inducers	1765	0.221206
ENSG00000196756	SNHG17	Inducers	1674	0.159649
ENSG00000196756	SNHG17	Inducers	1036	0.157717
ENSG00000196756	SNHG17	Inducers	1986	0.24181
ENSG00000196756	SNHG17	Inducers	268	0.187
ENSG00000196756	SNHG17	Inducers	1424	0.225329
ENSG00000196756	SNHG17	Inducers	479	0.211819
ENSG00000196756	SNHG17	Inducers	505	0.169627
ENSG00000196756	SNHG17	Inducers	176	0.174094
ENSG00000196756	SNHG17	Inducers	725	0.169067
ENSG00000196756	SNHG17	Inducers	223	0.183031
ENSG00000196756	SNHG17	Inducers	1503	0.181029
ENSG00000196756	SNHG17	Inducers	779	0.180745
ENSG00000196756	SNHG17	Inducers	935	0.245802
ENSG00000196756	SNHG17	Inducers	584	0.219561
ENSG00000196756	SNHG17	Inducers	715	0.172056
ENSG00000196756	SNHG17	Inducers	1496	0.187162
ENSG00000196756	SNHG17	Inducers	1448	0.2097
ENSG00000196756	SNHG17	Inducers	976	0.254278
ENSG00000196756	SNHG17	Inducers	1399	0.189281
ENSG00000196756	SNHG17	Inducers	197	0.210871
ENSG00000196756	SNHG17	Inducers	471	-0.12823
ENSG00000196756	SNHG17	Inducers	226	0.212044
ENSG00000196756	SNHG17	Inducers	2030	0.182996
ENSG00000196756	SNHG17	Inducers	836	0.172198
ENSG00000196756	SNHG17	Inducers	1683	0.23386
ENSG00000196756	SNHG17	Inducers	958	0.226992
ENSG00000196756	SNHG17	Inducers	1423	0.195911
ENSG00000196756	SNHG17	Inducers	726	0.178638
ENSG00000196756	SNHG17	Inducers	367	0.239316
ENSG00000196756	SNHG17	Inducers	1528	0.250458
ENSG00000196756	SNHG17	Inducers	1580	0.221293
ENSG00000196951	SCOC-AS1	Inducers	1498	0.182324
ENSG00000196951	SCOC-AS1	Inducers	1399	0.217411
ENSG00000196951	SCOC-AS1	Inducers	560	0.213125
ENSG00000196951	SCOC-AS1	Inducers	518	0.212228
ENSG00000196951	SCOC-AS1	Inducers	176	0.170125
ENSG00000196951	SCOC-AS1	Inducers	755	0.200146
ENSG00000196951	SCOC-AS1	Inducers	2592	0.199924
ENSG00000196951	SCOC-AS1	Inducers	505	0.201556
ENSG00000196951	SCOC-AS1	Inducers	1639	0.20946
ENSG00000196951	SCOC-AS1	Inducers	403	0.227427
ENSG00000196951	SCOC-AS1	Inducers	354	0.194228
ENSG00000196951	SCOC-AS1	Inducers	474	0.203126
ENSG00000196951	SCOC-AS1	Inducers	1800	-0.0471998
ENSG00000196951	SCOC-AS1	Inducers	1496	0.215561
ENSG00000196951	SCOC-AS1	Inducers	507	0.194873
ENSG00000196951	SCOC-AS1	Inducers	268	0.215012
ENSG00000196951	SCOC-AS1	Inducers	1503	0.160068
ENSG00000196951	SCOC-AS1	Inducers	223	0.147975
ENSG00000196951	SCOC-AS1	Inducers	726	0.210077
ENSG00000196951	SCOC-AS1	Inducers	471	-0.130026
ENSG00000196951	SCOC-AS1	Inducers	1448	0.233187
ENSG00000196951	SCOC-AS1	Inducers	1168	0.178666
ENSG00000198468	FLVCR1-AS1	Inducers	1168	0.171233
ENSG00000198468	FLVCR1-AS1	Inducers	518	0.171448
ENSG00000198468	FLVCR1-AS1	Inducers	836	0.151175
ENSG00000198468	FLVCR1-AS1	Inducers	1800	-0.0807085
ENSG00000198468	FLVCR1-AS1	Inducers	1496	0.172441
ENSG00000198468	FLVCR1-AS1	Inducers	268	0.179664
ENSG00000198468	FLVCR1-AS1	Inducers	1399	0.180257
ENSG00000198468	FLVCR1-AS1	Inducers	560	0.176647
ENSG00000198468	FLVCR1-AS1	Inducers	976	0.159568
ENSG00000198468	FLVCR1-AS1	Inducers	474	0.172342
ENSG00000198468	FLVCR1-AS1	Inducers	1503	0.151386
ENSG00000198468	FLVCR1-AS1	Inducers	403	0.163653
ENSG00000198468	FLVCR1-AS1	Inducers	223	0.138048
ENSG00000198468	FLVCR1-AS1	Inducers	507	0.162314
ENSG00000198468	FLVCR1-AS1	Inducers	1448	0.179298
ENSG00000198468	FLVCR1-AS1	Inducers	471	-0.108285
ENSG00000198468	FLVCR1-AS1	Inducers	726	0.16558
ENSG00000198468	FLVCR1-AS1	Inducers	1639	0.169591
ENSG00000198468	FLVCR1-AS1	Inducers	755	0.178405
ENSG00000198468	FLVCR1-AS1	Inducers	779	0.144888
ENSG00000198468	FLVCR1-AS1	Inducers	505	0.156877
ENSG00000203321	C9orf41-AS1	Inducers	354	0.215861
ENSG00000203321	C9orf41-AS1	Inducers	1399	0.212216
ENSG00000203321	C9orf41-AS1	Inducers	268	0.212654
ENSG00000203321	C9orf41-AS1	Inducers	1498	0.198823
ENSG00000203321	C9orf41-AS1	Inducers	471	-0.111162
ENSG00000203321	C9orf41-AS1	Inducers	518	0.204201
ENSG00000203321	C9orf41-AS1	Inducers	474	0.219255
ENSG00000203321	C9orf41-AS1	Inducers	403	0.241257
ENSG00000203321	C9orf41-AS1	Inducers	507	0.205706
ENSG00000203321	C9orf41-AS1	Inducers	755	0.192302
ENSG00000203321	C9orf41-AS1	Inducers	1496	0.209661
ENSG00000203321	C9orf41-AS1	Inducers	1639	0.218899
ENSG00000203321	C9orf41-AS1	Inducers	2592	0.227557
ENSG00000203321	C9orf41-AS1	Inducers	560	0.211554
ENSG00000203321	C9orf41-AS1	Inducers	329	0.229028
ENSG00000203321	C9orf41-AS1	Inducers	505	0.216746
ENSG00000203321	C9orf41-AS1	Inducers	726	0.222354
ENSG00000203321	C9orf41-AS1	Inducers	2014	-0.0805369
ENSG00000203362	AL355802.1	Inducers	1569	0.236505
ENSG00000203362	AL355802.1	Inducers	280	0.252312
ENSG00000203362	AL355802.1	Inducers	1800	-0.0350915
ENSG00000203362	AL355802.1	Inducers	726	0.266765
ENSG00000203362	AL355802.1	Inducers	1201	0.259421
ENSG00000203362	AL355802.1	Inducers	1498	0.245638
ENSG00000203362	AL355802.1	Inducers	507	0.244701
ENSG00000203362	AL355802.1	Inducers	223	0.18306
ENSG00000203362	AL355802.1	Inducers	1399	0.271582
ENSG00000203362	AL355802.1	Inducers	581	0.268102
ENSG00000203362	AL355802.1	Inducers	354	0.220206
ENSG00000203362	AL355802.1	Inducers	1448	0.253002
ENSG00000203362	AL355802.1	Inducers	755	0.265056
ENSG00000203362	AL355802.1	Inducers	474	0.300277
ENSG00000203362	AL355802.1	Inducers	176	0.22537
ENSG00000203362	AL355802.1	Inducers	976	0.20318
ENSG00000203362	AL355802.1	Inducers	268	0.261152
ENSG00000203362	AL355802.1	Inducers	1496	0.239095
ENSG00000203362	AL355802.1	Inducers	505	0.255838
ENSG00000203362	AL355802.1	Inducers	2592	0.220236
ENSG00000203362	AL355802.1	Inducers	560	0.268324
ENSG00000203362	AL355802.1	Inducers	595	0.257297
ENSG00000203362	AL355802.1	Inducers	518	0.263546
ENSG00000203362	AL355802.1	Inducers	1526	0.212296
ENSG00000203362	AL355802.1	Inducers	471	-0.0955263
ENSG00000203362	AL355802.1	Inducers	403	0.231054
ENSG00000203362	AL355802.1	Inducers	1619	0.232935
ENSG00000203644	AC083799.1	Inducers	367	0.157229
ENSG00000203644	AC083799.1	Inducers	1765	0.141247
ENSG00000203644	AC083799.1	Inducers	868	0.151988
ENSG00000203644	AC083799.1	Inducers	958	0.156454
ENSG00000203644	AC083799.1	Inducers	226	0.15439
ENSG00000203644	AC083799.1	Inducers	479	0.144016
ENSG00000203644	AC083799.1	Inducers	836	0.15437
ENSG00000203644	AC083799.1	Inducers	779	0.152811
ENSG00000203644	AC083799.1	Inducers	403	0.176094
ENSG00000203644	AC083799.1	Inducers	1870	0.153262
ENSG00000203644	AC083799.1	Inducers	1501	0.151121
ENSG00000203644	AC083799.1	Inducers	223	0.160088
ENSG00000203644	AC083799.1	Inducers	1674	0.152133
ENSG00000203644	AC083799.1	Inducers	1683	0.178713
ENSG00000203644	AC083799.1	Inducers	2030	0.163029
ENSG00000203644	AC083799.1	Inducers	584	0.156373
ENSG00000203644	AC083799.1	Inducers	1036	0.155562
ENSG00000203644	AC083799.1	Inducers	518	0.147106
ENSG00000203644	AC083799.1	Inducers	1105	0.142976
ENSG00000203644	AC083799.1	Inducers	952	0.149907
ENSG00000203644	AC083799.1	Inducers	471	-0.0878047
ENSG00000203644	AC083799.1	Inducers	1424	0.170542
ENSG00000203644	AC083799.1	Inducers	1503	0.15306
ENSG00000203644	AC083799.1	Inducers	354	0.166064
ENSG00000203644	AC083799.1	Inducers	1580	0.144367
ENSG00000203644	AC083799.1	Inducers	715	0.151528
ENSG00000203875	SNHG5	Inducers	1036	0.113352
ENSG00000203875	SNHG5	Inducers	1674	0.144296
ENSG00000203875	SNHG5	Inducers	726	0.152678
ENSG00000203875	SNHG5	Inducers	1500	0.3193
ENSG00000203875	SNHG5	Inducers	1526	0.175131
ENSG00000203875	SNHG5	Inducers	226	0.28121
ENSG00000203875	SNHG5	Inducers	1039	0.158197
ENSG00000203875	SNHG5	Inducers	367	0.195282
ENSG00000203875	SNHG5	Inducers	1503	0.187416
ENSG00000203875	SNHG5	Inducers	779	0.147365
ENSG00000203875	SNHG5	Inducers	2030	0.201807
ENSG00000203875	SNHG5	Inducers	1105	0.281468
ENSG00000203875	SNHG5	Inducers	1303	0.268349
ENSG00000203875	SNHG5	Inducers	1580	0.312493
ENSG00000203875	SNHG5	Inducers	1986	0.296723
ENSG00000203875	SNHG5	Inducers	795	0.18591
ENSG00000203875	SNHG5	Inducers	197	0.226169
ENSG00000203875	SNHG5	Inducers	479	0.282626
ENSG00000203875	SNHG5	Inducers	1870	0.137097
ENSG00000203875	SNHG5	Inducers	868	0.122219
ENSG00000203875	SNHG5	Inducers	584	0.166862
ENSG00000203875	SNHG5	Inducers	559	0.388282
ENSG00000203875	SNHG5	Inducers	1781	-0.137889
ENSG00000203875	SNHG5	Inducers	1765	0.304177
ENSG00000203875	SNHG5	Inducers	725	0.162369
ENSG00000203875	SNHG5	Inducers	1168	0.168495
ENSG00000203875	SNHG5	Inducers	1683	0.183948
ENSG00000203875	SNHG5	Inducers	1325	0.128792
ENSG00000203875	SNHG5	Inducers	1424	0.181302
ENSG00000203875	SNHG5	Inducers	935	0.324743
ENSG00000203875	SNHG5	Inducers	471	-0.180862
ENSG00000203875	SNHG5	Inducers	1779	0.353431
ENSG00000203875	SNHG5	Inducers	223	0.138215
ENSG00000203875	SNHG5	Inducers	976	0.173134
ENSG00000203875	SNHG5	Inducers	1501	0.198165
ENSG00000203875	SNHG5	Inducers	1528	0.200074
ENSG00000203993	ARRDC1-AS1	Inducers	1399	0.215519
ENSG00000203993	ARRDC1-AS1	Inducers	726	0.212344
ENSG00000203993	ARRDC1-AS1	Inducers	1498	0.19668
ENSG00000203993	ARRDC1-AS1	Inducers	505	0.208219
ENSG00000203993	ARRDC1-AS1	Inducers	223	0.167111
ENSG00000203993	ARRDC1-AS1	Inducers	354	0.186167
ENSG00000203993	ARRDC1-AS1	Inducers	471	-0.0786894
ENSG00000203993	ARRDC1-AS1	Inducers	518	0.201259
ENSG00000203993	ARRDC1-AS1	Inducers	1639	0.222246
ENSG00000203993	ARRDC1-AS1	Inducers	560	0.206654
ENSG00000203993	ARRDC1-AS1	Inducers	474	0.219292
ENSG00000203993	ARRDC1-AS1	Inducers	755	0.197985
ENSG00000203993	ARRDC1-AS1	Inducers	1448	0.232882
ENSG00000203993	ARRDC1-AS1	Inducers	176	0.196469
ENSG00000203993	ARRDC1-AS1	Inducers	507	0.197465
ENSG00000203993	ARRDC1-AS1	Inducers	268	0.21503
ENSG00000203993	ARRDC1-AS1	Inducers	1496	0.200097
ENSG00000203993	ARRDC1-AS1	Inducers	403	0.188506
ENSG00000205664	BX890604.1	Inducers	1639	0.236103
ENSG00000205664	BX890604.1	Inducers	479	0.147159
ENSG00000205664	BX890604.1	Inducers	518	0.199429
ENSG00000205664	BX890604.1	Inducers	1569	0.211538
ENSG00000205664	BX890604.1	Inducers	507	0.182964
ENSG00000205664	BX890604.1	Inducers	755	0.177572
ENSG00000205664	BX890604.1	Inducers	474	0.238859
ENSG00000205664	BX890604.1	Inducers	197	0.181292
ENSG00000205664	BX890604.1	Inducers	976	0.171263
ENSG00000205664	BX890604.1	Inducers	471	-0.126987
ENSG00000205664	BX890604.1	Inducers	560	0.204597
ENSG00000205664	BX890604.1	Inducers	1399	0.211661
ENSG00000205664	BX890604.1	Inducers	505	0.231626
ENSG00000205664	BX890604.1	Inducers	958	0.178793
ENSG00000205664	BX890604.1	Inducers	1986	0.187915
ENSG00000205664	BX890604.1	Inducers	795	0.172922
ENSG00000205664	BX890604.1	Inducers	403	0.18583
ENSG00000205664	BX890604.1	Inducers	2592	0.197622
ENSG00000205664	BX890604.1	Inducers	268	0.208556
ENSG00000205664	BX890604.1	Inducers	1448	0.207158
ENSG00000205664	BX890604.1	Inducers	1779	0.167752
ENSG00000205664	BX890604.1	Inducers	176	0.181434
ENSG00000205664	BX890604.1	Inducers	726	0.233502
ENSG00000205664	BX890604.1	Inducers	1526	0.173943
ENSG00000205664	BX890604.1	Inducers	1503	0.149711
ENSG00000205664	BX890604.1	Inducers	354	0.197446
ENSG00000205664	BX890604.1	Inducers	559	0.174532
ENSG00000205664	BX890604.1	Inducers	1498	0.200255
ENSG00000205790	DPP9-AS1	Inducers	471	-0.0169791
ENSG00000205790	DPP9-AS1	Inducers	268	0.220394
ENSG00000205790	DPP9-AS1	Inducers	560	0.215516
ENSG00000205790	DPP9-AS1	Inducers	1399	0.212149
ENSG00000205790	DPP9-AS1	Inducers	2592	0.233046
ENSG00000205790	DPP9-AS1	Inducers	354	0.203105
ENSG00000205790	DPP9-AS1	Inducers	403	0.2243
ENSG00000213279	Z97192.2	Inducers	268	0.199233
ENSG00000213279	Z97192.2	Inducers	471	-0.151462
ENSG00000213279	Z97192.2	Inducers	1779	0.183673
ENSG00000213279	Z97192.2	Inducers	403	0.199826
ENSG00000213279	Z97192.2	Inducers	1498	0.17562
ENSG00000213279	Z97192.2	Inducers	1399	0.201156
ENSG00000213279	Z97192.2	Inducers	505	0.189487
ENSG00000213279	Z97192.2	Inducers	1448	0.222527
ENSG00000213279	Z97192.2	Inducers	1619	0.179982
ENSG00000213279	Z97192.2	Inducers	559	0.187072
ENSG00000213279	Z97192.2	Inducers	1639	0.183618
ENSG00000213279	Z97192.2	Inducers	226	0.178316
ENSG00000213279	Z97192.2	Inducers	176	0.146151
ENSG00000213279	Z97192.2	Inducers	1569	0.180897
ENSG00000213279	Z97192.2	Inducers	479	0.173693
ENSG00000213279	Z97192.2	Inducers	935	0.158694
ENSG00000213279	Z97192.2	Inducers	367	0.172568
ENSG00000213279	Z97192.2	Inducers	1580	0.17743
ENSG00000213279	Z97192.2	Inducers	223	0.162898
ENSG00000213279	Z97192.2	Inducers	354	0.188556
ENSG00000213279	Z97192.2	Inducers	1800	-0.0620099
ENSG00000213279	Z97192.2	Inducers	1526	0.182282
ENSG00000213279	Z97192.2	Inducers	507	0.167708
ENSG00000213279	Z97192.2	Inducers	779	0.176087
ENSG00000213279	Z97192.2	Inducers	518	0.18758
ENSG00000213279	Z97192.2	Inducers	958	0.164548
ENSG00000213279	Z97192.2	Inducers	197	0.170041
ENSG00000213279	Z97192.2	Inducers	1503	0.17383
ENSG00000213279	Z97192.2	Inducers	1168	0.175874
ENSG00000213279	Z97192.2	Inducers	1528	0.200676
ENSG00000213279	Z97192.2	Inducers	976	0.191018
ENSG00000213279	Z97192.2	Inducers	584	0.16309
ENSG00000213279	Z97192.2	Inducers	726	0.193405
ENSG00000213279	Z97192.2	Inducers	2014	-0.100699
ENSG00000213279	Z97192.2	Inducers	795	0.188297
ENSG00000213279	Z97192.2	Inducers	755	0.17817
ENSG00000213279	Z97192.2	Inducers	1765	0.17597
ENSG00000213279	Z97192.2	Inducers	1986	0.174868
ENSG00000213279	Z97192.2	Inducers	560	0.186705
ENSG00000213279	Z97192.2	Inducers	1496	0.217129
ENSG00000213279	Z97192.2	Inducers	474	0.189547
ENSG00000213279	Z97192.2	Inducers	1105	0.168987
ENSG00000214248	AC010336.1	Inducers	518	0.173387
ENSG00000214248	AC010336.1	Inducers	2014	-0.184442
ENSG00000214248	AC010336.1	Inducers	1399	0.176352
ENSG00000214248	AC010336.1	Inducers	1639	0.202367
ENSG00000214248	AC010336.1	Inducers	471	-0.117744
ENSG00000214248	AC010336.1	Inducers	505	0.17837
ENSG00000214248	AC010336.1	Inducers	403	0.182919
ENSG00000214248	AC010336.1	Inducers	474	0.210629
ENSG00000214248	AC010336.1	Inducers	1696	-0.184525
ENSG00000214248	AC010336.1	Inducers	1800	-0.184525
ENSG00000214248	AC010336.1	Inducers	560	0.179137
ENSG00000214248	AC010336.1	Inducers	726	0.185953
ENSG00000214248	AC010336.1	Inducers	268	0.180664
ENSG00000215417	MIR17HG	Inducers	1800	-0.157858
ENSG00000215417	MIR17HG	Inducers	958	0.288785
ENSG00000215417	MIR17HG	Inducers	726	0.289255
ENSG00000215417	MIR17HG	Inducers	176	0.25032
ENSG00000215417	MIR17HG	Inducers	1870	0.158019
ENSG00000215417	MIR17HG	Inducers	1619	0.210139
ENSG00000215417	MIR17HG	Inducers	471	-0.224344
ENSG00000215417	MIR17HG	Inducers	1526	0.272525
ENSG00000215417	MIR17HG	Inducers	560	0.272348
ENSG00000215417	MIR17HG	Inducers	1501	0.186353
ENSG00000215417	MIR17HG	Inducers	505	0.263177
ENSG00000215417	MIR17HG	Inducers	1423	0.214196
ENSG00000215417	MIR17HG	Inducers	1498	0.29853
ENSG00000215417	MIR17HG	Inducers	976	0.310288
ENSG00000215417	MIR17HG	Inducers	1013	0.219472
ENSG00000215417	MIR17HG	Inducers	1528	0.288895
ENSG00000215417	MIR17HG	Inducers	507	0.22198
ENSG00000215417	MIR17HG	Inducers	559	0.243141
ENSG00000215417	MIR17HG	Inducers	935	0.20873
ENSG00000215417	MIR17HG	Inducers	354	0.26095
ENSG00000215417	MIR17HG	Inducers	403	0.27567
ENSG00000215417	MIR17HG	Inducers	474	0.246927
ENSG00000215417	MIR17HG	Inducers	1674	0.158352
ENSG00000215417	MIR17HG	Inducers	2592	0.287696
ENSG00000215417	MIR17HG	Inducers	1580	0.205318
ENSG00000215417	MIR17HG	Inducers	2030	0.230827
ENSG00000215417	MIR17HG	Inducers	223	0.181821
ENSG00000215417	MIR17HG	Inducers	479	0.211435
ENSG00000215417	MIR17HG	Inducers	1503	0.193801
ENSG00000215417	MIR17HG	Inducers	1569	0.235874
ENSG00000215417	MIR17HG	Inducers	367	0.266814
ENSG00000215417	MIR17HG	Inducers	836	0.160392
ENSG00000215417	MIR17HG	Inducers	1765	0.213752
ENSG00000215417	MIR17HG	Inducers	584	0.250807
ENSG00000215417	MIR17HG	Inducers	1683	0.255858
ENSG00000215417	MIR17HG	Inducers	779	0.198435
ENSG00000215417	MIR17HG	Inducers	795	0.32875
ENSG00000215417	MIR17HG	Inducers	755	0.276419
ENSG00000215417	MIR17HG	Inducers	226	0.207582
ENSG00000215417	MIR17HG	Inducers	1779	0.240568
ENSG00000215417	MIR17HG	Inducers	1399	0.276883
ENSG00000215417	MIR17HG	Inducers	268	0.274966
ENSG00000215417	MIR17HG	Inducers	518	0.270483
ENSG00000215417	MIR17HG	Inducers	1986	0.250956
ENSG00000215417	MIR17HG	Inducers	280	0.20479
ENSG00000215417	MIR17HG	Inducers	1496	0.279042
ENSG00000215417	MIR17HG	Inducers	1448	0.32774
ENSG00000215417	MIR17HG	Inducers	197	0.236553
ENSG00000215417	MIR17HG	Inducers	1105	0.206745
ENSG00000215417	MIR17HG	Inducers	1036	0.168557
ENSG00000215417	MIR17HG	Inducers	1303	0.199473
ENSG00000215417	MIR17HG	Inducers	595	0.235519
ENSG00000215417	MIR17HG	Inducers	1639	0.284675
ENSG00000215417	MIR17HG	Inducers	1424	0.288782
ENSG00000215417	MIR17HG	Inducers	868	0.153607
ENSG00000216895	AC009403.1	Inducers	1696	-0.122857
ENSG00000216895	AC009403.1	Inducers	935	0.184806
ENSG00000216895	AC009403.1	Inducers	492	-0.116385
ENSG00000216895	AC009403.1	Inducers	1399	0.196587
ENSG00000216895	AC009403.1	Inducers	2014	-0.180607
ENSG00000216895	AC009403.1	Inducers	1986	0.199335
ENSG00000216895	AC009403.1	Inducers	1800	-0.129403
ENSG00000216895	AC009403.1	Inducers	1779	0.188286
ENSG00000216895	AC009403.1	Inducers	226	0.17937
ENSG00000216895	AC009403.1	Inducers	1448	0.202333
ENSG00000216895	AC009403.1	Inducers	560	0.181986
ENSG00000216895	AC009403.1	Inducers	1424	0.203509
ENSG00000216895	AC009403.1	Inducers	1580	0.186905
ENSG00000216895	AC009403.1	Inducers	1781	-0.101942
ENSG00000216895	AC009403.1	Inducers	518	0.169921
ENSG00000216895	AC009403.1	Inducers	1765	0.169273
ENSG00000216895	AC009403.1	Inducers	367	0.198419
ENSG00000216895	AC009403.1	Inducers	1526	0.181324
ENSG00000216895	AC009403.1	Inducers	268	0.193245
ENSG00000216895	AC009403.1	Inducers	559	0.204455
ENSG00000216895	AC009403.1	Inducers	471	-0.196422
ENSG00000216895	AC009403.1	Inducers	976	0.189971
ENSG00000216895	AC009403.1	Inducers	726	0.193216
ENSG00000216895	AC009403.1	Inducers	1496	0.209602
ENSG00000216895	AC009403.1	Inducers	795	0.186847
ENSG00000216895	AC009403.1	Inducers	505	0.185885
ENSG00000219410	AC125494.1	Inducers	474	0.249426
ENSG00000219410	AC125494.1	Inducers	403	0.242817
ENSG00000219410	AC125494.1	Inducers	1639	0.234182
ENSG00000219410	AC125494.1	Inducers	560	0.227005
ENSG00000219410	AC125494.1	Inducers	329	0.254658
ENSG00000219410	AC125494.1	Inducers	518	0.218856
ENSG00000219410	AC125494.1	Inducers	595	0.219388
ENSG00000219410	AC125494.1	Inducers	354	0.248006
ENSG00000219410	AC125494.1	Inducers	268	0.226321
ENSG00000219410	AC125494.1	Inducers	505	0.215524
ENSG00000219410	AC125494.1	Inducers	1201	0.22021
ENSG00000219410	AC125494.1	Inducers	726	0.224448
ENSG00000219410	AC125494.1	Inducers	1399	0.227456
ENSG00000219410	AC125494.1	Inducers	755	0.229794
ENSG00000219410	AC125494.1	Inducers	471	-0.0510216
ENSG00000219410	AC125494.1	Inducers	1498	0.252254
ENSG00000219410	AC125494.1	Inducers	2592	0.266785
ENSG00000219665	AC008770.1	Inducers	1639	0.231996
ENSG00000219665	AC008770.1	Inducers	474	0.243144
ENSG00000219665	AC008770.1	Inducers	1448	0.221817
ENSG00000219665	AC008770.1	Inducers	726	0.232294
ENSG00000219665	AC008770.1	Inducers	779	0.169062
ENSG00000219665	AC008770.1	Inducers	226	0.160008
ENSG00000219665	AC008770.1	Inducers	755	0.192806
ENSG00000219665	AC008770.1	Inducers	1986	0.18531
ENSG00000219665	AC008770.1	Inducers	403	0.213127
ENSG00000219665	AC008770.1	Inducers	1503	0.18438
ENSG00000219665	AC008770.1	Inducers	268	0.208411
ENSG00000219665	AC008770.1	Inducers	1498	0.205904
ENSG00000219665	AC008770.1	Inducers	479	0.163872
ENSG00000219665	AC008770.1	Inducers	1496	0.217387
ENSG00000219665	AC008770.1	Inducers	518	0.206316
ENSG00000219665	AC008770.1	Inducers	176	0.198844
ENSG00000219665	AC008770.1	Inducers	1870	0.156091
ENSG00000219665	AC008770.1	Inducers	1765	0.159354
ENSG00000219665	AC008770.1	Inducers	1501	0.168053
ENSG00000219665	AC008770.1	Inducers	1580	0.18178
ENSG00000219665	AC008770.1	Inducers	935	0.169003
ENSG00000219665	AC008770.1	Inducers	197	0.185688
ENSG00000219665	AC008770.1	Inducers	1399	0.213363
ENSG00000219665	AC008770.1	Inducers	1168	0.187659
ENSG00000219665	AC008770.1	Inducers	354	0.206542
ENSG00000219665	AC008770.1	Inducers	1569	0.205233
ENSG00000219665	AC008770.1	Inducers	560	0.2036
ENSG00000219665	AC008770.1	Inducers	1779	0.178392
ENSG00000219665	AC008770.1	Inducers	223	0.161058
ENSG00000219665	AC008770.1	Inducers	507	0.197509
ENSG00000219665	AC008770.1	Inducers	559	0.178045
ENSG00000219665	AC008770.1	Inducers	471	-0.108787
ENSG00000219665	AC008770.1	Inducers	505	0.227841
ENSG00000223374	AC005104.1	Inducers	1800	-0.032048
ENSG00000223374	AC005104.1	Inducers	2592	0.280506
ENSG00000223374	AC005104.1	Inducers	471	-0.0625753
ENSG00000223374	AC005104.1	Inducers	560	0.24114
ENSG00000223374	AC005104.1	Inducers	1399	0.232284
ENSG00000223374	AC005104.1	Inducers	2014	-0.0988909
ENSG00000223374	AC005104.1	Inducers	518	0.240747
ENSG00000223374	AC005104.1	Inducers	726	0.263343
ENSG00000223374	AC005104.1	Inducers	492	-0.0258649
ENSG00000223374	AC005104.1	Inducers	474	0.286949
ENSG00000223374	AC005104.1	Inducers	268	0.239294
ENSG00000223374	AC005104.1	Inducers	403	0.246994
ENSG00000223374	AC005104.1	Inducers	1639	0.266495
ENSG00000223374	AC005104.1	Inducers	354	0.256133
ENSG00000223374	AC005104.1	Inducers	505	0.236268
ENSG00000223461	AC004471.1	Inducers	581	0.194299
ENSG00000223461	AC004471.1	Inducers	755	0.161969
ENSG00000223461	AC004471.1	Inducers	283	0.175725
ENSG00000223461	AC004471.1	Inducers	952	0.155116
ENSG00000223461	AC004471.1	Inducers	1986	0.168885
ENSG00000223461	AC004471.1	Inducers	223	0.141961
ENSG00000223461	AC004471.1	Inducers	752	0.171912
ENSG00000223461	AC004471.1	Inducers	544	0.163841
ENSG00000223461	AC004471.1	Inducers	1036	0.150319
ENSG00000223461	AC004471.1	Inducers	268	0.152306
ENSG00000223461	AC004471.1	Inducers	1674	0.147194
ENSG00000223461	AC004471.1	Inducers	507	0.174214
ENSG00000223461	AC004471.1	Inducers	297	0.212795
ENSG00000223461	AC004471.1	Inducers	1013	0.165977
ENSG00000223461	AC004471.1	Inducers	413	0.187719
ENSG00000223461	AC004471.1	Inducers	836	0.146922
ENSG00000223461	AC004471.1	Inducers	560	0.154487
ENSG00000223461	AC004471.1	Inducers	1168	0.170631
ENSG00000223461	AC004471.1	Inducers	779	0.156476
ENSG00000223461	AC004471.1	Inducers	1496	0.170803
ENSG00000223461	AC004471.1	Inducers	1870	0.150573
ENSG00000223461	AC004471.1	Inducers	518	0.160674
ENSG00000223461	AC004471.1	Inducers	1503	0.153276
ENSG00000223461	AC004471.1	Inducers	1501	0.149126
ENSG00000223461	AC004471.1	Inducers	176	0.167981
ENSG00000223461	AC004471.1	Inducers	868	0.151859
ENSG00000223692	DIP2A-IT1	Inducers	976	0.150706
ENSG00000223692	DIP2A-IT1	Inducers	581	0.157246
ENSG00000223821	AL603910.1	Inducers	403	0.149476
ENSG00000223821	AL603910.1	Inducers	226	0.118704
ENSG00000223821	AL603910.1	Inducers	223	0.114689
ENSG00000223821	AL603910.1	Inducers	1765	0.130843
ENSG00000223821	AL603910.1	Inducers	354	0.146765
ENSG00000223821	AL603910.1	Inducers	505	0.144882
ENSG00000223821	AL603910.1	Inducers	1496	0.151964
ENSG00000223821	AL603910.1	Inducers	479	0.134095
ENSG00000223821	AL603910.1	Inducers	1399	0.161226
ENSG00000223821	AL603910.1	Inducers	559	0.139031
ENSG00000223821	AL603910.1	Inducers	1448	0.145468
ENSG00000223821	AL603910.1	Inducers	1639	0.157363
ENSG00000223821	AL603910.1	Inducers	474	0.146232
ENSG00000223821	AL603910.1	Inducers	1779	0.131846
ENSG00000223821	AL603910.1	Inducers	560	0.149496
ENSG00000223821	AL603910.1	Inducers	518	0.144149
ENSG00000223821	AL603910.1	Inducers	1503	0.140647
ENSG00000223821	AL603910.1	Inducers	755	0.144409
ENSG00000223821	AL603910.1	Inducers	1501	0.136375
ENSG00000223821	AL603910.1	Inducers	2030	0.146592
ENSG00000223821	AL603910.1	Inducers	2592	0.149924
ENSG00000223821	AL603910.1	Inducers	268	0.153669
ENSG00000223821	AL603910.1	Inducers	726	0.155479
ENSG00000223821	AL603910.1	Inducers	471	-0.140556
ENSG00000223821	AL603910.1	Inducers	1781	-0.1056
ENSG00000224046	AC005076.1	Inducers	403	0.19908
ENSG00000224046	AC005076.1	Inducers	354	0.171515
ENSG00000224046	AC005076.1	Inducers	755	0.219103
ENSG00000224046	AC005076.1	Inducers	1448	0.231423
ENSG00000224046	AC005076.1	Inducers	471	-0.117365
ENSG00000224046	AC005076.1	Inducers	507	0.19791
ENSG00000224046	AC005076.1	Inducers	492	-0.123791
ENSG00000224046	AC005076.1	Inducers	560	0.215238
ENSG00000224046	AC005076.1	Inducers	1496	0.229658
ENSG00000224046	AC005076.1	Inducers	1498	0.200988
ENSG00000224046	AC005076.1	Inducers	2014	-0.178512
ENSG00000224046	AC005076.1	Inducers	1696	-0.128647
ENSG00000224046	AC005076.1	Inducers	518	0.212655
ENSG00000224046	AC005076.1	Inducers	268	0.224261
ENSG00000224046	AC005076.1	Inducers	1800	-0.138716
ENSG00000224046	AC005076.1	Inducers	1399	0.225372
ENSG00000224635	AL391095.1	Inducers	2592	0.23324
ENSG00000224635	AL391095.1	Inducers	726	0.224278
ENSG00000224635	AL391095.1	Inducers	584	0.205731
ENSG00000224635	AL391095.1	Inducers	1800	-0.0661687
ENSG00000224635	AL391095.1	Inducers	1503	0.190713
ENSG00000224635	AL391095.1	Inducers	1870	0.182707
ENSG00000224635	AL391095.1	Inducers	1528	0.220822
ENSG00000224635	AL391095.1	Inducers	795	0.231335
ENSG00000224635	AL391095.1	Inducers	2030	0.212059
ENSG00000224635	AL391095.1	Inducers	505	0.218336
ENSG00000224635	AL391095.1	Inducers	1501	0.187769
ENSG00000224635	AL391095.1	Inducers	1526	0.235662
ENSG00000224635	AL391095.1	Inducers	560	0.232862
ENSG00000224635	AL391095.1	Inducers	1569	0.219982
ENSG00000224635	AL391095.1	Inducers	474	0.230314
ENSG00000224635	AL391095.1	Inducers	2014	-0.120551
ENSG00000224635	AL391095.1	Inducers	1448	0.215757
ENSG00000224635	AL391095.1	Inducers	268	0.242183
ENSG00000224635	AL391095.1	Inducers	1696	-0.0573192
ENSG00000224635	AL391095.1	Inducers	223	0.189471
ENSG00000224635	AL391095.1	Inducers	492	-0.0573192
ENSG00000224635	AL391095.1	Inducers	479	0.194487
ENSG00000224635	AL391095.1	Inducers	176	0.206043
ENSG00000224635	AL391095.1	Inducers	507	0.215022
ENSG00000224635	AL391095.1	Inducers	1496	0.221319
ENSG00000224635	AL391095.1	Inducers	958	0.230271
ENSG00000224635	AL391095.1	Inducers	976	0.231861
ENSG00000224635	AL391095.1	Inducers	836	0.190795
ENSG00000224635	AL391095.1	Inducers	197	0.192608
ENSG00000224635	AL391095.1	Inducers	367	0.222032
ENSG00000224635	AL391095.1	Inducers	471	-0.11701
ENSG00000224635	AL391095.1	Inducers	755	0.251868
ENSG00000224635	AL391095.1	Inducers	1639	0.236
ENSG00000224635	AL391095.1	Inducers	518	0.221051
ENSG00000224635	AL391095.1	Inducers	329	0.226721
ENSG00000224635	AL391095.1	Inducers	1498	0.208621
ENSG00000224635	AL391095.1	Inducers	1036	0.189589
ENSG00000224635	AL391095.1	Inducers	779	0.19101
ENSG00000224635	AL391095.1	Inducers	1674	0.183753
ENSG00000224635	AL391095.1	Inducers	1399	0.245738
ENSG00000224635	AL391095.1	Inducers	403	0.212465
ENSG00000224635	AL391095.1	Inducers	354	0.206233
ENSG00000224707	E2F3-IT1	Inducers	726	0.226485
ENSG00000224707	E2F3-IT1	Inducers	403	0.187832
ENSG00000224707	E2F3-IT1	Inducers	474	0.228195
ENSG00000224707	E2F3-IT1	Inducers	518	0.196442
ENSG00000224707	E2F3-IT1	Inducers	755	0.191718
ENSG00000224707	E2F3-IT1	Inducers	505	0.21092
ENSG00000224707	E2F3-IT1	Inducers	2592	0.209755
ENSG00000224707	E2F3-IT1	Inducers	354	0.204339
ENSG00000224707	E2F3-IT1	Inducers	507	0.192009
ENSG00000224707	E2F3-IT1	Inducers	560	0.199396
ENSG00000224707	E2F3-IT1	Inducers	1399	0.210468
ENSG00000224707	E2F3-IT1	Inducers	471	-0.104621
ENSG00000224707	E2F3-IT1	Inducers	1569	0.195956
ENSG00000224707	E2F3-IT1	Inducers	329	0.219211
ENSG00000224707	E2F3-IT1	Inducers	1498	0.20174
ENSG00000224707	E2F3-IT1	Inducers	1639	0.218646
ENSG00000224707	E2F3-IT1	Inducers	268	0.206736
ENSG00000224738	AC099850.1	Inducers	755	0.22617
ENSG00000224738	AC099850.1	Inducers	2030	0.179203
ENSG00000224738	AC099850.1	Inducers	1013	0.19522
ENSG00000224738	AC099850.1	Inducers	935	0.176013
ENSG00000224738	AC099850.1	Inducers	725	0.175908
ENSG00000224738	AC099850.1	Inducers	976	0.166945
ENSG00000224738	AC099850.1	Inducers	1496	0.212541
ENSG00000224738	AC099850.1	Inducers	518	0.209767
ENSG00000224738	AC099850.1	Inducers	1503	0.161678
ENSG00000224738	AC099850.1	Inducers	1779	0.185899
ENSG00000224738	AC099850.1	Inducers	1674	0.156752
ENSG00000224738	AC099850.1	Inducers	268	0.214537
ENSG00000224738	AC099850.1	Inducers	1448	0.19629
ENSG00000224738	AC099850.1	Inducers	1765	0.165768
ENSG00000224738	AC099850.1	Inducers	1870	0.162202
ENSG00000224738	AC099850.1	Inducers	1424	0.184024
ENSG00000224738	AC099850.1	Inducers	1105	0.167279
ENSG00000224738	AC099850.1	Inducers	176	0.178382
ENSG00000224738	AC099850.1	Inducers	507	0.184994
ENSG00000224738	AC099850.1	Inducers	413	0.185118
ENSG00000224738	AC099850.1	Inducers	1399	0.213781
ENSG00000224738	AC099850.1	Inducers	223	0.168422
ENSG00000224738	AC099850.1	Inducers	560	0.202823
ENSG00000224738	AC099850.1	Inducers	354	0.179927
ENSG00000224738	AC099850.1	Inducers	581	0.203385
ENSG00000224738	AC099850.1	Inducers	1036	0.158654
ENSG00000224738	AC099850.1	Inducers	2592	0.191517
ENSG00000224738	AC099850.1	Inducers	479	0.16519
ENSG00000224738	AC099850.1	Inducers	1501	0.159581
ENSG00000224738	AC099850.1	Inducers	1168	0.177477
ENSG00000224738	AC099850.1	Inducers	1360	0.214702
ENSG00000224738	AC099850.1	Inducers	958	0.181072
ENSG00000224738	AC099850.1	Inducers	544	0.175526
ENSG00000224738	AC099850.1	Inducers	226	0.17302
ENSG00000224738	AC099850.1	Inducers	779	0.172323
ENSG00000224738	AC099850.1	Inducers	1580	0.17854
ENSG00000224870	AL391244.1	Inducers	976	0.205492
ENSG00000224870	AL391244.1	Inducers	1781	-0.0389382
ENSG00000224870	AL391244.1	Inducers	726	0.25189
ENSG00000224870	AL391244.1	Inducers	559	0.169496
ENSG00000224870	AL391244.1	Inducers	958	0.203048
ENSG00000224870	AL391244.1	Inducers	1569	0.223938
ENSG00000224870	AL391244.1	Inducers	1399	0.220914
ENSG00000224870	AL391244.1	Inducers	1168	0.205627
ENSG00000224870	AL391244.1	Inducers	471	-0.178523
ENSG00000224870	AL391244.1	Inducers	1696	-0.139229
ENSG00000224870	AL391244.1	Inducers	795	0.212163
ENSG00000224870	AL391244.1	Inducers	474	0.275373
ENSG00000224870	AL391244.1	Inducers	492	-0.0989218
ENSG00000224870	AL391244.1	Inducers	1779	0.173399
ENSG00000224870	AL391244.1	Inducers	197	0.191859
ENSG00000224870	AL391244.1	Inducers	1498	0.234898
ENSG00000224870	AL391244.1	Inducers	1986	0.212864
ENSG00000224870	AL391244.1	Inducers	507	0.208675
ENSG00000224870	AL391244.1	Inducers	1526	0.199169
ENSG00000224870	AL391244.1	Inducers	505	0.272071
ENSG00000224870	AL391244.1	Inducers	1639	0.271384
ENSG00000224870	AL391244.1	Inducers	1448	0.256768
ENSG00000224870	AL391244.1	Inducers	2014	-0.174386
ENSG00000224870	AL391244.1	Inducers	1496	0.238812
ENSG00000224870	AL391244.1	Inducers	560	0.201861
ENSG00000224870	AL391244.1	Inducers	518	0.195589
ENSG00000224870	AL391244.1	Inducers	1800	-0.137901
ENSG00000224870	AL391244.1	Inducers	268	0.215341
ENSG00000224870	AL391244.1	Inducers	403	0.217372
ENSG00000224870	AL391244.1	Inducers	354	0.18877
ENSG00000224875	AC083949.1	Inducers	1528	0.17613
ENSG00000224875	AC083949.1	Inducers	479	0.154752
ENSG00000224875	AC083949.1	Inducers	354	0.167317
ENSG00000224875	AC083949.1	Inducers	471	-0.133724
ENSG00000224875	AC083949.1	Inducers	1986	0.195968
ENSG00000224875	AC083949.1	Inducers	1448	0.1835
ENSG00000224875	AC083949.1	Inducers	779	0.131245
ENSG00000224875	AC083949.1	Inducers	935	0.148239
ENSG00000224875	AC083949.1	Inducers	1399	0.177136
ENSG00000224875	AC083949.1	Inducers	1765	0.153775
ENSG00000224875	AC083949.1	Inducers	268	0.179731
ENSG00000224875	AC083949.1	Inducers	595	0.17438
ENSG00000224875	AC083949.1	Inducers	1168	0.176276
ENSG00000224875	AC083949.1	Inducers	559	0.178849
ENSG00000224875	AC083949.1	Inducers	1580	0.17096
ENSG00000224875	AC083949.1	Inducers	1639	0.183488
ENSG00000224875	AC083949.1	Inducers	505	0.199028
ENSG00000224875	AC083949.1	Inducers	560	0.166445
ENSG00000224875	AC083949.1	Inducers	1501	0.134463
ENSG00000224875	AC083949.1	Inducers	518	0.155188
ENSG00000224875	AC083949.1	Inducers	197	0.163701
ENSG00000224875	AC083949.1	Inducers	367	0.172685
ENSG00000224875	AC083949.1	Inducers	1779	0.176658
ENSG00000224875	AC083949.1	Inducers	1526	0.150952
ENSG00000224875	AC083949.1	Inducers	474	0.191021
ENSG00000224875	AC083949.1	Inducers	403	0.182509
ENSG00000224875	AC083949.1	Inducers	1503	0.147939
ENSG00000224875	AC083949.1	Inducers	1498	0.176488
ENSG00000224875	AC083949.1	Inducers	1105	0.149682
ENSG00000224875	AC083949.1	Inducers	976	0.16229
ENSG00000224875	AC083949.1	Inducers	584	0.174232
ENSG00000224875	AC083949.1	Inducers	726	0.184873
ENSG00000224875	AC083949.1	Inducers	226	0.152534
ENSG00000224875	AC083949.1	Inducers	223	0.126755
ENSG00000224888	AC138028.2	Inducers	1448	0.210246
ENSG00000224888	AC138028.2	Inducers	329	0.223296
ENSG00000224888	AC138028.2	Inducers	726	0.196638
ENSG00000224888	AC138028.2	Inducers	471	-0.0640378
ENSG00000224888	AC138028.2	Inducers	354	0.201536
ENSG00000224888	AC138028.2	Inducers	474	0.218419
ENSG00000224888	AC138028.2	Inducers	505	0.200254
ENSG00000224888	AC138028.2	Inducers	1399	0.18771
ENSG00000224888	AC138028.2	Inducers	2592	0.239723
ENSG00000225037	EIF1AX-AS1	Inducers	354	0.173073
ENSG00000225037	EIF1AX-AS1	Inducers	471	-0.0955007
ENSG00000225037	EIF1AX-AS1	Inducers	403	0.160759
ENSG00000225163	LINC00618	Inducers	197	0.205034
ENSG00000225163	LINC00618	Inducers	581	0.243206
ENSG00000225163	LINC00618	Inducers	1696	-0.0376276
ENSG00000225163	LINC00618	Inducers	518	0.246204
ENSG00000225163	LINC00618	Inducers	223	0.171843
ENSG00000225163	LINC00618	Inducers	795	0.190371
ENSG00000225163	LINC00618	Inducers	474	0.282082
ENSG00000225163	LINC00618	Inducers	1528	0.210656
ENSG00000225163	LINC00618	Inducers	559	0.171533
ENSG00000225163	LINC00618	Inducers	1800	-0.0376276
ENSG00000225163	LINC00618	Inducers	560	0.24857
ENSG00000225163	LINC00618	Inducers	755	0.277491
ENSG00000225163	LINC00618	Inducers	1360	0.239544
ENSG00000225163	LINC00618	Inducers	1105	0.181978
ENSG00000225163	LINC00618	Inducers	1569	0.239246
ENSG00000225163	LINC00618	Inducers	1168	0.197464
ENSG00000225163	LINC00618	Inducers	1448	0.276149
ENSG00000225163	LINC00618	Inducers	1580	0.191272
ENSG00000225163	LINC00618	Inducers	1036	0.169696
ENSG00000225163	LINC00618	Inducers	1639	0.266549
ENSG00000225163	LINC00618	Inducers	1498	0.233949
ENSG00000225163	LINC00618	Inducers	268	0.261036
ENSG00000225163	LINC00618	Inducers	779	0.179818
ENSG00000225163	LINC00618	Inducers	958	0.219008
ENSG00000225163	LINC00618	Inducers	403	0.227533
ENSG00000225163	LINC00618	Inducers	329	0.259351
ENSG00000225163	LINC00618	Inducers	471	-0.128021
ENSG00000225163	LINC00618	Inducers	976	0.191457
ENSG00000225163	LINC00618	Inducers	367	0.191755
ENSG00000225163	LINC00618	Inducers	1503	0.189932
ENSG00000225163	LINC00618	Inducers	1496	0.276151
ENSG00000225163	LINC00618	Inducers	1765	0.177353
ENSG00000225163	LINC00618	Inducers	226	0.184499
ENSG00000225163	LINC00618	Inducers	505	0.238173
ENSG00000225163	LINC00618	Inducers	1399	0.263958
ENSG00000225163	LINC00618	Inducers	176	0.218697
ENSG00000225163	LINC00618	Inducers	479	0.182944
ENSG00000225163	LINC00618	Inducers	2030	0.213074
ENSG00000225163	LINC00618	Inducers	726	0.25207
ENSG00000225163	LINC00618	Inducers	1779	0.180391
ENSG00000225163	LINC00618	Inducers	507	0.257074
ENSG00000225163	LINC00618	Inducers	354	0.255521
ENSG00000225163	LINC00618	Inducers	2592	0.28252
ENSG00000225218	AP001628.1	Inducers	795	0.20461
ENSG00000225218	AP001628.1	Inducers	2014	-0.11743
ENSG00000225218	AP001628.1	Inducers	1399	0.168724
ENSG00000225218	AP001628.1	Inducers	1696	-0.0522147
ENSG00000225218	AP001628.1	Inducers	518	0.174835
ENSG00000225218	AP001628.1	Inducers	958	0.19135
ENSG00000225218	AP001628.1	Inducers	2592	0.201713
ENSG00000225218	AP001628.1	Inducers	1496	0.182193
ENSG00000225218	AP001628.1	Inducers	268	0.173157
ENSG00000225218	AP001628.1	Inducers	584	0.170304
ENSG00000225218	AP001628.1	Inducers	1800	-0.0522147
ENSG00000225218	AP001628.1	Inducers	474	0.186252
ENSG00000225218	AP001628.1	Inducers	1528	0.189511
ENSG00000225218	AP001628.1	Inducers	471	-0.104712
ENSG00000225218	AP001628.1	Inducers	1639	0.193641
ENSG00000225218	AP001628.1	Inducers	367	0.178339
ENSG00000225218	AP001628.1	Inducers	726	0.181496
ENSG00000225218	AP001628.1	Inducers	1526	0.198801
ENSG00000225218	AP001628.1	Inducers	505	0.180515
ENSG00000225218	AP001628.1	Inducers	560	0.176645
ENSG00000225218	AP001628.1	Inducers	976	0.203256
ENSG00000225218	AP001628.1	Inducers	176	0.170623
ENSG00000225218	AP001628.1	Inducers	223	0.148949
ENSG00000225218	AP001628.1	Inducers	755	0.191975
ENSG00000225218	AP001628.1	Inducers	492	-0.0522147
ENSG00000225218	AP001628.1	Inducers	354	0.182439
ENSG00000225218	AP001628.1	Inducers	403	0.210148
ENSG00000225230	AC008937.1	Inducers	795	0.186375
ENSG00000225230	AC008937.1	Inducers	976	0.187216
ENSG00000225230	AC008937.1	Inducers	367	0.18051
ENSG00000225230	AC008937.1	Inducers	584	0.16794
ENSG00000225230	AC008937.1	Inducers	1526	0.177027
ENSG00000225484	NUTM2B-AS1	Inducers	518	0.141197
ENSG00000225484	NUTM2B-AS1	Inducers	505	0.154845
ENSG00000225484	NUTM2B-AS1	Inducers	726	0.164302
ENSG00000225484	NUTM2B-AS1	Inducers	559	0.189246
ENSG00000225484	NUTM2B-AS1	Inducers	268	0.14987
ENSG00000225484	NUTM2B-AS1	Inducers	1501	0.146961
ENSG00000225484	NUTM2B-AS1	Inducers	479	0.15705
ENSG00000225484	NUTM2B-AS1	Inducers	1303	0.175804
ENSG00000225484	NUTM2B-AS1	Inducers	1399	0.148123
ENSG00000225484	NUTM2B-AS1	Inducers	367	0.164766
ENSG00000225484	NUTM2B-AS1	Inducers	226	0.154925
ENSG00000225484	NUTM2B-AS1	Inducers	471	-0.113226
ENSG00000225484	NUTM2B-AS1	Inducers	935	0.173554
ENSG00000225484	NUTM2B-AS1	Inducers	1036	0.154434
ENSG00000225484	NUTM2B-AS1	Inducers	1986	0.172261
ENSG00000225484	NUTM2B-AS1	Inducers	1779	0.185892
ENSG00000225484	NUTM2B-AS1	Inducers	1503	0.157509
ENSG00000225484	NUTM2B-AS1	Inducers	1580	0.184688
ENSG00000225484	NUTM2B-AS1	Inducers	1765	0.164448
ENSG00000225484	NUTM2B-AS1	Inducers	1500	0.173748
ENSG00000225484	NUTM2B-AS1	Inducers	1870	0.148718
ENSG00000225484	NUTM2B-AS1	Inducers	1105	0.155621
ENSG00000225484	NUTM2B-AS1	Inducers	354	0.146252
ENSG00000225484	NUTM2B-AS1	Inducers	223	0.149776
ENSG00000225527	AL450384.1	Inducers	755	0.189379
ENSG00000225527	AL450384.1	Inducers	560	0.221222
ENSG00000225527	AL450384.1	Inducers	2014	-0.152465
ENSG00000225527	AL450384.1	Inducers	1526	0.189572
ENSG00000225527	AL450384.1	Inducers	354	0.220072
ENSG00000225527	AL450384.1	Inducers	1399	0.220144
ENSG00000225527	AL450384.1	Inducers	795	0.198525
ENSG00000225527	AL450384.1	Inducers	507	0.205301
ENSG00000225527	AL450384.1	Inducers	268	0.22032
ENSG00000225527	AL450384.1	Inducers	1696	-0.115533
ENSG00000225527	AL450384.1	Inducers	518	0.211169
ENSG00000225527	AL450384.1	Inducers	474	0.263177
ENSG00000225527	AL450384.1	Inducers	1800	-0.125884
ENSG00000225527	AL450384.1	Inducers	1498	0.219785
ENSG00000225527	AL450384.1	Inducers	492	-0.113611
ENSG00000225527	AL450384.1	Inducers	471	-0.137512
ENSG00000225527	AL450384.1	Inducers	2592	0.23189
ENSG00000225527	AL450384.1	Inducers	726	0.227185
ENSG00000225527	AL450384.1	Inducers	403	0.238642
ENSG00000225527	AL450384.1	Inducers	505	0.217535
ENSG00000225675	LINC01771	Inducers	1105	0.174675
ENSG00000225675	LINC01771	Inducers	354	0.21867
ENSG00000225675	LINC01771	Inducers	560	0.2217
ENSG00000225675	LINC01771	Inducers	518	0.214587
ENSG00000225675	LINC01771	Inducers	471	-0.177519
ENSG00000225675	LINC01771	Inducers	795	0.245953
ENSG00000225675	LINC01771	Inducers	1779	0.214261
ENSG00000225675	LINC01771	Inducers	1496	0.231998
ENSG00000225675	LINC01771	Inducers	507	0.190226
ENSG00000225675	LINC01771	Inducers	1800	-0.082056
ENSG00000225675	LINC01771	Inducers	584	0.195121
ENSG00000225675	LINC01771	Inducers	726	0.209872
ENSG00000225675	LINC01771	Inducers	1498	0.197471
ENSG00000225675	LINC01771	Inducers	1765	0.185321
ENSG00000225675	LINC01771	Inducers	1501	0.162536
ENSG00000225675	LINC01771	Inducers	1986	0.220959
ENSG00000225675	LINC01771	Inducers	1503	0.175251
ENSG00000225675	LINC01771	Inducers	1526	0.230451
ENSG00000225675	LINC01771	Inducers	1448	0.257781
ENSG00000225675	LINC01771	Inducers	226	0.183445
ENSG00000225675	LINC01771	Inducers	367	0.20119
ENSG00000225675	LINC01771	Inducers	223	0.166368
ENSG00000225675	LINC01771	Inducers	755	0.230498
ENSG00000225675	LINC01771	Inducers	559	0.210673
ENSG00000225675	LINC01771	Inducers	976	0.229658
ENSG00000225675	LINC01771	Inducers	505	0.211152
ENSG00000225675	LINC01771	Inducers	1528	0.205937
ENSG00000225675	LINC01771	Inducers	197	0.197813
ENSG00000225675	LINC01771	Inducers	176	0.198407
ENSG00000225675	LINC01771	Inducers	1639	0.21764
ENSG00000225675	LINC01771	Inducers	1569	0.207951
ENSG00000225675	LINC01771	Inducers	1696	-0.0674158
ENSG00000225675	LINC01771	Inducers	1168	0.227051
ENSG00000225675	LINC01771	Inducers	1580	0.20003
ENSG00000225675	LINC01771	Inducers	958	0.19297
ENSG00000225675	LINC01771	Inducers	2014	-0.13687
ENSG00000225675	LINC01771	Inducers	479	0.184087
ENSG00000225675	LINC01771	Inducers	2592	0.211852
ENSG00000225675	LINC01771	Inducers	268	0.224574
ENSG00000225675	LINC01771	Inducers	836	0.167036
ENSG00000225675	LINC01771	Inducers	403	0.229612
ENSG00000225675	LINC01771	Inducers	492	-0.0461697
ENSG00000225675	LINC01771	Inducers	474	0.225337
ENSG00000225675	LINC01771	Inducers	779	0.165078
ENSG00000225675	LINC01771	Inducers	935	0.171719
ENSG00000225675	LINC01771	Inducers	1399	0.223445
ENSG00000225798	AC025918.1	Inducers	297	-0.00954776
ENSG00000225798	AC025918.1	Inducers	354	0.194249
ENSG00000225798	AC025918.1	Inducers	544	-0.0336508
ENSG00000225822	UBXN7-AS1	Inducers	518	0.228188
ENSG00000225822	UBXN7-AS1	Inducers	560	0.228901
ENSG00000225822	UBXN7-AS1	Inducers	505	0.203527
ENSG00000225822	UBXN7-AS1	Inducers	354	0.225963
ENSG00000225822	UBXN7-AS1	Inducers	268	0.231408
ENSG00000225822	UBXN7-AS1	Inducers	403	0.22113
ENSG00000225822	UBXN7-AS1	Inducers	474	0.225368
ENSG00000225822	UBXN7-AS1	Inducers	507	0.225378
ENSG00000225822	UBXN7-AS1	Inducers	726	0.214208
ENSG00000225822	UBXN7-AS1	Inducers	471	-0.0522867
ENSG00000225822	UBXN7-AS1	Inducers	1498	0.219974
ENSG00000225822	UBXN7-AS1	Inducers	2592	0.22903
ENSG00000225822	UBXN7-AS1	Inducers	755	0.235399
ENSG00000225822	UBXN7-AS1	Inducers	1448	0.214335
ENSG00000225822	UBXN7-AS1	Inducers	1639	0.21274
ENSG00000225822	UBXN7-AS1	Inducers	1399	0.228239
ENSG00000225822	UBXN7-AS1	Inducers	1496	0.207178
ENSG00000226180	AC010536.1	Inducers	329	0.249537
ENSG00000226180	AC010536.1	Inducers	1526	0.204041
ENSG00000226180	AC010536.1	Inducers	1399	0.220898
ENSG00000226180	AC010536.1	Inducers	1569	0.242095
ENSG00000226180	AC010536.1	Inducers	223	0.185002
ENSG00000226180	AC010536.1	Inducers	836	0.194461
ENSG00000226180	AC010536.1	Inducers	755	0.242296
ENSG00000226180	AC010536.1	Inducers	958	0.230461
ENSG00000226180	AC010536.1	Inducers	1448	0.216971
ENSG00000226180	AC010536.1	Inducers	505	0.242505
ENSG00000226180	AC010536.1	Inducers	595	0.197204
ENSG00000226180	AC010536.1	Inducers	471	-0.100004
ENSG00000226180	AC010536.1	Inducers	1639	0.251794
ENSG00000226180	AC010536.1	Inducers	1496	0.218707
ENSG00000226180	AC010536.1	Inducers	2592	0.225392
ENSG00000226180	AC010536.1	Inducers	403	0.229667
ENSG00000226180	AC010536.1	Inducers	474	0.272404
ENSG00000226180	AC010536.1	Inducers	795	0.202305
ENSG00000226180	AC010536.1	Inducers	354	0.199013
ENSG00000226180	AC010536.1	Inducers	367	0.195066
ENSG00000226180	AC010536.1	Inducers	560	0.216738
ENSG00000226180	AC010536.1	Inducers	268	0.213014
ENSG00000226180	AC010536.1	Inducers	1498	0.255237
ENSG00000226180	AC010536.1	Inducers	726	0.247493
ENSG00000226180	AC010536.1	Inducers	176	0.2124
ENSG00000226180	AC010536.1	Inducers	507	0.209513
ENSG00000226180	AC010536.1	Inducers	976	0.201459
ENSG00000226180	AC010536.1	Inducers	518	0.212759
ENSG00000226645	AP006216.1	Inducers	474	0.209825
ENSG00000226645	AP006216.1	Inducers	2592	0.188791
ENSG00000226645	AP006216.1	Inducers	1696	-0.0816699
ENSG00000226645	AP006216.1	Inducers	1448	0.189263
ENSG00000226645	AP006216.1	Inducers	518	0.165842
ENSG00000226645	AP006216.1	Inducers	1498	0.19334
ENSG00000226645	AP006216.1	Inducers	471	-0.158282
ENSG00000226645	AP006216.1	Inducers	1526	0.18248
ENSG00000226645	AP006216.1	Inducers	560	0.169628
ENSG00000226645	AP006216.1	Inducers	403	0.192039
ENSG00000226645	AP006216.1	Inducers	1639	0.208876
ENSG00000226645	AP006216.1	Inducers	726	0.210727
ENSG00000226645	AP006216.1	Inducers	1683	0.183678
ENSG00000226645	AP006216.1	Inducers	505	0.192185
ENSG00000226645	AP006216.1	Inducers	1800	-0.0892606
ENSG00000226645	AP006216.1	Inducers	976	0.172241
ENSG00000226645	AP006216.1	Inducers	354	0.182938
ENSG00000226645	AP006216.1	Inducers	2014	-0.116513
ENSG00000226645	AP006216.1	Inducers	492	-0.0816699
ENSG00000226645	AP006216.1	Inducers	958	0.177182
ENSG00000226645	AP006216.1	Inducers	795	0.185014
ENSG00000226645	AP006216.1	Inducers	1496	0.191021
ENSG00000226645	AP006216.1	Inducers	1399	0.179304
ENSG00000226645	AP006216.1	Inducers	268	0.173305
ENSG00000226647	AL365356.1	Inducers	505	0.266005
ENSG00000226647	AL365356.1	Inducers	507	0.236326
ENSG00000226647	AL365356.1	Inducers	1639	0.265593
ENSG00000226647	AL365356.1	Inducers	474	0.277996
ENSG00000226647	AL365356.1	Inducers	471	-0.0883496
ENSG00000226647	AL365356.1	Inducers	2592	0.288877
ENSG00000226647	AL365356.1	Inducers	329	0.303252
ENSG00000226647	AL365356.1	Inducers	2014	-0.0422276
ENSG00000226647	AL365356.1	Inducers	1399	0.257182
ENSG00000226647	AL365356.1	Inducers	518	0.255113
ENSG00000226647	AL365356.1	Inducers	755	0.224842
ENSG00000226647	AL365356.1	Inducers	403	0.289752
ENSG00000226647	AL365356.1	Inducers	560	0.265056
ENSG00000226647	AL365356.1	Inducers	367	0.242799
ENSG00000226647	AL365356.1	Inducers	726	0.282132
ENSG00000226647	AL365356.1	Inducers	1498	0.279481
ENSG00000226647	AL365356.1	Inducers	354	0.270033
ENSG00000226647	AL365356.1	Inducers	268	0.264948
ENSG00000226688	ENTPD1-AS1	Inducers	560	0.289073
ENSG00000226688	ENTPD1-AS1	Inducers	726	0.342559
ENSG00000226688	ENTPD1-AS1	Inducers	976	0.29527
ENSG00000226688	ENTPD1-AS1	Inducers	1765	0.237474
ENSG00000226688	ENTPD1-AS1	Inducers	1503	0.25117
ENSG00000226688	ENTPD1-AS1	Inducers	595	0.259815
ENSG00000226688	ENTPD1-AS1	Inducers	197	0.255954
ENSG00000226688	ENTPD1-AS1	Inducers	367	0.255973
ENSG00000226688	ENTPD1-AS1	Inducers	958	0.280471
ENSG00000226688	ENTPD1-AS1	Inducers	779	0.224848
ENSG00000226688	ENTPD1-AS1	Inducers	507	0.278623
ENSG00000226688	ENTPD1-AS1	Inducers	2014	-0.113363
ENSG00000226688	ENTPD1-AS1	Inducers	1498	0.309135
ENSG00000226688	ENTPD1-AS1	Inducers	1639	0.347566
ENSG00000226688	ENTPD1-AS1	Inducers	559	0.259981
ENSG00000226688	ENTPD1-AS1	Inducers	1619	0.25718
ENSG00000226688	ENTPD1-AS1	Inducers	479	0.254497
ENSG00000226688	ENTPD1-AS1	Inducers	1448	0.342229
ENSG00000226688	ENTPD1-AS1	Inducers	584	0.25006
ENSG00000226688	ENTPD1-AS1	Inducers	354	0.269919
ENSG00000226688	ENTPD1-AS1	Inducers	474	0.376579
ENSG00000226688	ENTPD1-AS1	Inducers	518	0.279094
ENSG00000226688	ENTPD1-AS1	Inducers	226	0.219392
ENSG00000226688	ENTPD1-AS1	Inducers	755	0.29697
ENSG00000226688	ENTPD1-AS1	Inducers	1528	0.239335
ENSG00000226688	ENTPD1-AS1	Inducers	280	0.252637
ENSG00000226688	ENTPD1-AS1	Inducers	1399	0.304896
ENSG00000226688	ENTPD1-AS1	Inducers	1496	0.291103
ENSG00000226688	ENTPD1-AS1	Inducers	1201	0.26385
ENSG00000226688	ENTPD1-AS1	Inducers	403	0.273242
ENSG00000226688	ENTPD1-AS1	Inducers	471	-0.175393
ENSG00000226688	ENTPD1-AS1	Inducers	1800	-0.0714268
ENSG00000226688	ENTPD1-AS1	Inducers	795	0.299471
ENSG00000226688	ENTPD1-AS1	Inducers	1779	0.263668
ENSG00000226688	ENTPD1-AS1	Inducers	1526	0.273283
ENSG00000226688	ENTPD1-AS1	Inducers	1986	0.26236
ENSG00000226688	ENTPD1-AS1	Inducers	2592	0.282549
ENSG00000226688	ENTPD1-AS1	Inducers	268	0.295976
ENSG00000226688	ENTPD1-AS1	Inducers	1580	0.241537
ENSG00000226688	ENTPD1-AS1	Inducers	1501	0.230382
ENSG00000226688	ENTPD1-AS1	Inducers	223	0.22084
ENSG00000226688	ENTPD1-AS1	Inducers	505	0.335712
ENSG00000226688	ENTPD1-AS1	Inducers	492	-0.0315563
ENSG00000226688	ENTPD1-AS1	Inducers	1696	-0.0586847
ENSG00000226688	ENTPD1-AS1	Inducers	176	0.267363
ENSG00000226706	AL161452.1	Inducers	1528	0.198526
ENSG00000226706	AL161452.1	Inducers	471	-0.102246
ENSG00000226706	AL161452.1	Inducers	474	0.217712
ENSG00000226706	AL161452.1	Inducers	726	0.18525
ENSG00000226706	AL161452.1	Inducers	2014	-0.143311
ENSG00000226706	AL161452.1	Inducers	795	0.187147
ENSG00000226706	AL161452.1	Inducers	958	0.199762
ENSG00000226706	AL161452.1	Inducers	1696	-0.142496
ENSG00000226706	AL161452.1	Inducers	1526	0.179569
ENSG00000226706	AL161452.1	Inducers	976	0.182427
ENSG00000226706	AL161452.1	Inducers	367	0.179909
ENSG00000226800	CACTIN-AS1	Inducers	505	0.210573
ENSG00000226800	CACTIN-AS1	Inducers	403	0.203668
ENSG00000226800	CACTIN-AS1	Inducers	507	0.199282
ENSG00000226800	CACTIN-AS1	Inducers	560	0.190825
ENSG00000226800	CACTIN-AS1	Inducers	1639	0.233768
ENSG00000226800	CACTIN-AS1	Inducers	268	0.196451
ENSG00000226800	CACTIN-AS1	Inducers	329	0.215945
ENSG00000226800	CACTIN-AS1	Inducers	474	0.24835
ENSG00000226800	CACTIN-AS1	Inducers	367	0.203761
ENSG00000226800	CACTIN-AS1	Inducers	354	0.201371
ENSG00000226800	CACTIN-AS1	Inducers	1399	0.192498
ENSG00000226800	CACTIN-AS1	Inducers	726	0.213279
ENSG00000226800	CACTIN-AS1	Inducers	2592	0.214746
ENSG00000226800	CACTIN-AS1	Inducers	471	-0.0338566
ENSG00000226803	AL136311.1	Inducers	560	0.230745
ENSG00000226803	AL136311.1	Inducers	354	0.285401
ENSG00000226803	AL136311.1	Inducers	474	0.276789
ENSG00000226803	AL136311.1	Inducers	1498	0.238311
ENSG00000226803	AL136311.1	Inducers	518	0.23122
ENSG00000226803	AL136311.1	Inducers	403	0.235544
ENSG00000226803	AL136311.1	Inducers	268	0.238167
ENSG00000226803	AL136311.1	Inducers	2592	0.301389
ENSG00000226803	AL136311.1	Inducers	726	0.254915
ENSG00000226803	AL136311.1	Inducers	1399	0.234891
ENSG00000226803	AL136311.1	Inducers	505	0.235209
ENSG00000226803	AL136311.1	Inducers	507	0.246891
ENSG00000226920	AL160004.1	Inducers	836	0.18995
ENSG00000226920	AL160004.1	Inducers	1569	0.197505
ENSG00000226920	AL160004.1	Inducers	1526	0.199961
ENSG00000226920	AL160004.1	Inducers	471	-0.116422
ENSG00000226920	AL160004.1	Inducers	474	0.227357
ENSG00000226920	AL160004.1	Inducers	779	0.170402
ENSG00000226920	AL160004.1	Inducers	223	0.16848
ENSG00000226920	AL160004.1	Inducers	176	0.203622
ENSG00000226920	AL160004.1	Inducers	755	0.206704
ENSG00000226920	AL160004.1	Inducers	518	0.170867
ENSG00000226920	AL160004.1	Inducers	507	0.186464
ENSG00000226920	AL160004.1	Inducers	795	0.194653
ENSG00000226920	AL160004.1	Inducers	1496	0.190808
ENSG00000226920	AL160004.1	Inducers	560	0.17725
ENSG00000226920	AL160004.1	Inducers	1399	0.182664
ENSG00000226920	AL160004.1	Inducers	354	0.176446
ENSG00000226920	AL160004.1	Inducers	726	0.205382
ENSG00000226920	AL160004.1	Inducers	1498	0.190767
ENSG00000226920	AL160004.1	Inducers	1036	0.171996
ENSG00000226920	AL160004.1	Inducers	505	0.192491
ENSG00000226920	AL160004.1	Inducers	958	0.202242
ENSG00000226920	AL160004.1	Inducers	2030	0.183554
ENSG00000226920	AL160004.1	Inducers	976	0.184679
ENSG00000226920	AL160004.1	Inducers	1639	0.232316
ENSG00000226920	AL160004.1	Inducers	1448	0.197432
ENSG00000226920	AL160004.1	Inducers	268	0.176534
ENSG00000226950	DANCR	Inducers	544	0.264418
ENSG00000226950	DANCR	Inducers	471	-0.205303
ENSG00000226950	DANCR	Inducers	354	0.165841
ENSG00000226950	DANCR	Inducers	779	0.210722
ENSG00000226950	DANCR	Inducers	795	0.300419
ENSG00000226950	DANCR	Inducers	755	0.259318
ENSG00000226950	DANCR	Inducers	725	0.208448
ENSG00000226950	DANCR	Inducers	836	0.214349
ENSG00000226950	DANCR	Inducers	1498	0.224863
ENSG00000226950	DANCR	Inducers	1674	0.206744
ENSG00000226950	DANCR	Inducers	935	0.292861
ENSG00000226950	DANCR	Inducers	507	0.204666
ENSG00000226950	DANCR	Inducers	757	0.17036
ENSG00000226950	DANCR	Inducers	367	0.242923
ENSG00000226950	DANCR	Inducers	1423	0.216622
ENSG00000226950	DANCR	Inducers	1580	0.262673
ENSG00000226950	DANCR	Inducers	283	0.21127
ENSG00000226950	DANCR	Inducers	492	-0.168927
ENSG00000226950	DANCR	Inducers	1526	0.269199
ENSG00000226950	DANCR	Inducers	518	0.226327
ENSG00000226950	DANCR	Inducers	1424	0.285074
ENSG00000226950	DANCR	Inducers	403	0.205402
ENSG00000226950	DANCR	Inducers	1105	0.236396
ENSG00000226950	DANCR	Inducers	976	0.286111
ENSG00000226950	DANCR	Inducers	505	0.195545
ENSG00000226950	DANCR	Inducers	1168	0.260208
ENSG00000226950	DANCR	Inducers	1039	0.195888
ENSG00000226950	DANCR	Inducers	1765	0.245427
ENSG00000226950	DANCR	Inducers	1496	0.262611
ENSG00000226950	DANCR	Inducers	1036	0.198818
ENSG00000226950	DANCR	Inducers	197	0.238401
ENSG00000226950	DANCR	Inducers	1528	0.260695
ENSG00000226950	DANCR	Inducers	958	0.243458
ENSG00000226950	DANCR	Inducers	479	0.237242
ENSG00000226950	DANCR	Inducers	952	0.237687
ENSG00000226950	DANCR	Inducers	176	0.218156
ENSG00000226950	DANCR	Inducers	1503	0.228213
ENSG00000226950	DANCR	Inducers	1696	-0.148599
ENSG00000226950	DANCR	Inducers	560	0.220452
ENSG00000226950	DANCR	Inducers	2030	0.265235
ENSG00000226950	DANCR	Inducers	1639	0.218264
ENSG00000226950	DANCR	Inducers	1501	0.225794
ENSG00000226950	DANCR	Inducers	1870	0.203669
ENSG00000226950	DANCR	Inducers	1399	0.230409
ENSG00000226950	DANCR	Inducers	2014	-0.176653
ENSG00000226950	DANCR	Inducers	268	0.229034
ENSG00000226950	DANCR	Inducers	715	0.196071
ENSG00000226950	DANCR	Inducers	1013	0.18432
ENSG00000226950	DANCR	Inducers	726	0.207055
ENSG00000226950	DANCR	Inducers	1448	0.263901
ENSG00000226950	DANCR	Inducers	1986	0.287118
ENSG00000226950	DANCR	Inducers	474	0.212187
ENSG00000226950	DANCR	Inducers	1800	-0.181976
ENSG00000226950	DANCR	Inducers	1303	0.212269
ENSG00000226950	DANCR	Inducers	1683	0.275673
ENSG00000226950	DANCR	Inducers	1779	0.284441
ENSG00000226950	DANCR	Inducers	223	0.220618
ENSG00000226950	DANCR	Inducers	1500	0.283126
ENSG00000226950	DANCR	Inducers	1325	0.206005
ENSG00000226950	DANCR	Inducers	559	0.296506
ENSG00000226950	DANCR	Inducers	584	0.204076
ENSG00000226950	DANCR	Inducers	226	0.235705
ENSG00000226950	DANCR	Inducers	868	0.19869
ENSG00000227071	FOCAD-AS1	Inducers	223	0.135611
ENSG00000227215	AL355613.1	Inducers	1569	0.196301
ENSG00000227215	AL355613.1	Inducers	354	0.176023
ENSG00000227215	AL355613.1	Inducers	755	0.179136
ENSG00000227215	AL355613.1	Inducers	505	0.199808
ENSG00000227215	AL355613.1	Inducers	1639	0.204719
ENSG00000227215	AL355613.1	Inducers	329	0.210544
ENSG00000227215	AL355613.1	Inducers	403	0.19075
ENSG00000227215	AL355613.1	Inducers	471	-0.109194
ENSG00000227215	AL355613.1	Inducers	176	0.172402
ENSG00000227215	AL355613.1	Inducers	268	0.17918
ENSG00000227215	AL355613.1	Inducers	2592	0.18569
ENSG00000227215	AL355613.1	Inducers	518	0.183183
ENSG00000227215	AL355613.1	Inducers	1498	0.201823
ENSG00000227215	AL355613.1	Inducers	1399	0.176557
ENSG00000227215	AL355613.1	Inducers	560	0.180102
ENSG00000227215	AL355613.1	Inducers	726	0.2088
ENSG00000227215	AL355613.1	Inducers	2014	-0.0707992
ENSG00000227215	AL355613.1	Inducers	474	0.216451
ENSG00000227245	AC092042.1	Inducers	559	-0.130109
ENSG00000227245	AC092042.1	Inducers	1779	-0.0728289
ENSG00000227245	AC092042.1	Inducers	935	-0.0395582
ENSG00000227245	AC092042.1	Inducers	1765	-0.000577585
ENSG00000227245	AC092042.1	Inducers	1580	-0.0178235
ENSG00000227540	DNAJC9-AS1	Inducers	2592	0.179215
ENSG00000227540	DNAJC9-AS1	Inducers	226	0.156929
ENSG00000227540	DNAJC9-AS1	Inducers	403	0.173212
ENSG00000227540	DNAJC9-AS1	Inducers	1765	0.150282
ENSG00000227540	DNAJC9-AS1	Inducers	935	0.176897
ENSG00000227540	DNAJC9-AS1	Inducers	1500	0.222028
ENSG00000227540	DNAJC9-AS1	Inducers	471	-0.143616
ENSG00000227540	DNAJC9-AS1	Inducers	1779	0.184408
ENSG00000227540	DNAJC9-AS1	Inducers	1399	0.171018
ENSG00000227540	DNAJC9-AS1	Inducers	1580	0.16324
ENSG00000227540	DNAJC9-AS1	Inducers	559	0.189605
ENSG00000227540	DNAJC9-AS1	Inducers	268	0.182705
ENSG00000227540	DNAJC9-AS1	Inducers	560	0.181338
ENSG00000227540	DNAJC9-AS1	Inducers	518	0.181515
ENSG00000227540	DNAJC9-AS1	Inducers	1986	0.176829
ENSG00000227540	DNAJC9-AS1	Inducers	507	0.180566
ENSG00000227540	DNAJC9-AS1	Inducers	1496	0.177823
ENSG00000227540	DNAJC9-AS1	Inducers	1303	0.167979
ENSG00000227540	DNAJC9-AS1	Inducers	354	0.180185
ENSG00000227598	Z94721.1	Inducers	518	0.27697
ENSG00000227598	Z94721.1	Inducers	560	0.27544
ENSG00000227598	Z94721.1	Inducers	283	0.231452
ENSG00000227598	Z94721.1	Inducers	1569	0.224827
ENSG00000227598	Z94721.1	Inducers	1870	0.166069
ENSG00000227598	Z94721.1	Inducers	507	0.27617
ENSG00000227598	Z94721.1	Inducers	2592	0.319375
ENSG00000227598	Z94721.1	Inducers	1498	0.242609
ENSG00000227598	Z94721.1	Inducers	474	0.246609
ENSG00000227598	Z94721.1	Inducers	354	0.275152
ENSG00000227598	Z94721.1	Inducers	952	0.183233
ENSG00000227598	Z94721.1	Inducers	1674	0.173273
ENSG00000227598	Z94721.1	Inducers	268	0.290572
ENSG00000227598	Z94721.1	Inducers	1360	0.250801
ENSG00000227598	Z94721.1	Inducers	1580	0.169305
ENSG00000227598	Z94721.1	Inducers	1501	0.180967
ENSG00000227598	Z94721.1	Inducers	836	0.188436
ENSG00000227598	Z94721.1	Inducers	581	0.28763
ENSG00000227598	Z94721.1	Inducers	868	0.189821
ENSG00000227598	Z94721.1	Inducers	471	-0.0766154
ENSG00000227598	Z94721.1	Inducers	223	0.173313
ENSG00000227598	Z94721.1	Inducers	1013	0.210594
ENSG00000227598	Z94721.1	Inducers	544	0.202301
ENSG00000227598	Z94721.1	Inducers	403	0.22261
ENSG00000227598	Z94721.1	Inducers	779	0.192443
ENSG00000227598	Z94721.1	Inducers	1503	0.195452
ENSG00000227598	Z94721.1	Inducers	559	0.153821
ENSG00000227598	Z94721.1	Inducers	1036	0.18358
ENSG00000227598	Z94721.1	Inducers	479	0.188397
ENSG00000227598	Z94721.1	Inducers	226	0.175792
ENSG00000227598	Z94721.1	Inducers	176	0.237077
ENSG00000227598	Z94721.1	Inducers	755	0.274432
ENSG00000227598	Z94721.1	Inducers	726	0.255908
ENSG00000227598	Z94721.1	Inducers	2030	0.195965
ENSG00000227598	Z94721.1	Inducers	1639	0.256225
ENSG00000227598	Z94721.1	Inducers	505	0.254434
ENSG00000227598	Z94721.1	Inducers	1765	0.172325
ENSG00000227598	Z94721.1	Inducers	1496	0.261449
ENSG00000227598	Z94721.1	Inducers	1105	0.179053
ENSG00000227598	Z94721.1	Inducers	329	0.243419
ENSG00000227598	Z94721.1	Inducers	1399	0.286111
ENSG00000227598	Z94721.1	Inducers	1448	0.350646
ENSG00000227963	AL355488.1	Inducers	1424	0.220224
ENSG00000227963	AL355488.1	Inducers	560	0.249622
ENSG00000227963	AL355488.1	Inducers	1779	0.183551
ENSG00000227963	AL355488.1	Inducers	1683	0.21506
ENSG00000227963	AL355488.1	Inducers	1036	0.176365
ENSG00000227963	AL355488.1	Inducers	836	0.187286
ENSG00000227963	AL355488.1	Inducers	474	0.245725
ENSG00000227963	AL355488.1	Inducers	1765	0.1763
ENSG00000227963	AL355488.1	Inducers	354	0.218567
ENSG00000227963	AL355488.1	Inducers	581	0.251914
ENSG00000227963	AL355488.1	Inducers	1800	-0.111279
ENSG00000227963	AL355488.1	Inducers	868	0.169022
ENSG00000227963	AL355488.1	Inducers	283	0.229
ENSG00000227963	AL355488.1	Inducers	268	0.260423
ENSG00000227963	AL355488.1	Inducers	779	0.194898
ENSG00000227963	AL355488.1	Inducers	755	0.277293
ENSG00000227963	AL355488.1	Inducers	1674	0.170009
ENSG00000227963	AL355488.1	Inducers	935	0.178239
ENSG00000227963	AL355488.1	Inducers	197	0.180439
ENSG00000227963	AL355488.1	Inducers	1696	-0.0546986
ENSG00000227963	AL355488.1	Inducers	479	0.190037
ENSG00000227963	AL355488.1	Inducers	1569	0.244335
ENSG00000227963	AL355488.1	Inducers	1325	0.176041
ENSG00000227963	AL355488.1	Inducers	471	-0.149693
ENSG00000227963	AL355488.1	Inducers	976	0.194044
ENSG00000227963	AL355488.1	Inducers	413	0.196662
ENSG00000227963	AL355488.1	Inducers	952	0.201979
ENSG00000227963	AL355488.1	Inducers	1105	0.174679
ENSG00000227963	AL355488.1	Inducers	367	0.160659
ENSG00000227963	AL355488.1	Inducers	223	0.187448
ENSG00000227963	AL355488.1	Inducers	518	0.243555
ENSG00000227963	AL355488.1	Inducers	1580	0.197216
ENSG00000227963	AL355488.1	Inducers	1496	0.252553
ENSG00000227963	AL355488.1	Inducers	1639	0.242562
ENSG00000227963	AL355488.1	Inducers	1526	0.183999
ENSG00000227963	AL355488.1	Inducers	795	0.18795
ENSG00000227963	AL355488.1	Inducers	403	0.206349
ENSG00000227963	AL355488.1	Inducers	1168	0.200155
ENSG00000227963	AL355488.1	Inducers	1448	0.29313
ENSG00000227963	AL355488.1	Inducers	1360	0.259898
ENSG00000227963	AL355488.1	Inducers	1503	0.192292
ENSG00000227963	AL355488.1	Inducers	1498	0.218987
ENSG00000227963	AL355488.1	Inducers	2030	0.251637
ENSG00000227963	AL355488.1	Inducers	715	0.18128
ENSG00000227963	AL355488.1	Inducers	726	0.22606
ENSG00000227963	AL355488.1	Inducers	1399	0.265767
ENSG00000227963	AL355488.1	Inducers	507	0.230721
ENSG00000227963	AL355488.1	Inducers	544	0.205651
ENSG00000227963	AL355488.1	Inducers	958	0.190023
ENSG00000227963	AL355488.1	Inducers	226	0.181338
ENSG00000227963	AL355488.1	Inducers	1870	0.166935
ENSG00000227963	AL355488.1	Inducers	176	0.215652
ENSG00000227963	AL355488.1	Inducers	505	0.227341
ENSG00000227963	AL355488.1	Inducers	1528	0.188036
ENSG00000227963	AL355488.1	Inducers	1501	0.181389
ENSG00000227963	AL355488.1	Inducers	2592	0.234976
ENSG00000228124	AL096678.1	Inducers	1569	0.165315
ENSG00000228124	AL096678.1	Inducers	354	0.158592
ENSG00000228124	AL096678.1	Inducers	1448	0.177411
ENSG00000228124	AL096678.1	Inducers	1399	0.167598
ENSG00000228124	AL096678.1	Inducers	560	0.156364
ENSG00000228124	AL096678.1	Inducers	403	0.165724
ENSG00000228124	AL096678.1	Inducers	779	0.129214
ENSG00000228124	AL096678.1	Inducers	471	-0.101212
ENSG00000228124	AL096678.1	Inducers	1496	0.162835
ENSG00000228124	AL096678.1	Inducers	726	0.148927
ENSG00000228124	AL096678.1	Inducers	474	0.150524
ENSG00000228124	AL096678.1	Inducers	223	0.128131
ENSG00000228124	AL096678.1	Inducers	505	0.156154
ENSG00000228124	AL096678.1	Inducers	755	0.167745
ENSG00000228124	AL096678.1	Inducers	507	0.161077
ENSG00000228124	AL096678.1	Inducers	518	0.155661
ENSG00000228124	AL096678.1	Inducers	268	0.161579
ENSG00000228192	AL512353.1	Inducers	958	0.162197
ENSG00000228192	AL512353.1	Inducers	1526	0.178221
ENSG00000228192	AL512353.1	Inducers	584	0.183166
ENSG00000228192	AL512353.1	Inducers	1800	-0.15274
ENSG00000228192	AL512353.1	Inducers	2014	-0.142258
ENSG00000228192	AL512353.1	Inducers	1528	0.155418
ENSG00000228192	AL512353.1	Inducers	1696	-0.151713
ENSG00000228192	AL512353.1	Inducers	976	0.172842
ENSG00000228192	AL512353.1	Inducers	367	0.179428
ENSG00000228192	AL512353.1	Inducers	492	-0.142533
ENSG00000228192	AL512353.1	Inducers	795	0.179582
ENSG00000228237	EFCAB14-AS1	Inducers	354	0.189498
ENSG00000228237	EFCAB14-AS1	Inducers	471	-0.0355392
ENSG00000228237	EFCAB14-AS1	Inducers	2592	0.211996
ENSG00000228237	EFCAB14-AS1	Inducers	403	0.200365
ENSG00000228237	EFCAB14-AS1	Inducers	1498	0.207282
ENSG00000228237	EFCAB14-AS1	Inducers	268	0.191034
ENSG00000228237	EFCAB14-AS1	Inducers	726	0.195836
ENSG00000228237	EFCAB14-AS1	Inducers	560	0.187002
ENSG00000228302	AL512770.1	Inducers	1526	0.229963
ENSG00000228302	AL512770.1	Inducers	1800	-0.0432012
ENSG00000228302	AL512770.1	Inducers	726	0.302983
ENSG00000228302	AL512770.1	Inducers	1619	0.240901
ENSG00000228302	AL512770.1	Inducers	505	0.281449
ENSG00000228302	AL512770.1	Inducers	2592	0.301374
ENSG00000228302	AL512770.1	Inducers	471	-0.152993
ENSG00000228302	AL512770.1	Inducers	1399	0.267002
ENSG00000228302	AL512770.1	Inducers	958	0.25108
ENSG00000228302	AL512770.1	Inducers	268	0.26717
ENSG00000228302	AL512770.1	Inducers	518	0.251969
ENSG00000228302	AL512770.1	Inducers	474	0.327838
ENSG00000228302	AL512770.1	Inducers	403	0.277032
ENSG00000228302	AL512770.1	Inducers	976	0.235317
ENSG00000228302	AL512770.1	Inducers	354	0.285766
ENSG00000228302	AL512770.1	Inducers	329	0.28792
ENSG00000228302	AL512770.1	Inducers	1639	0.269906
ENSG00000228302	AL512770.1	Inducers	2014	-0.138798
ENSG00000228302	AL512770.1	Inducers	507	0.23974
ENSG00000228302	AL512770.1	Inducers	1201	0.237278
ENSG00000228302	AL512770.1	Inducers	795	0.242238
ENSG00000228302	AL512770.1	Inducers	755	0.263472
ENSG00000228302	AL512770.1	Inducers	1496	0.271958
ENSG00000228302	AL512770.1	Inducers	595	0.225278
ENSG00000228302	AL512770.1	Inducers	492	-0.0164345
ENSG00000228302	AL512770.1	Inducers	1696	-0.0436553
ENSG00000228302	AL512770.1	Inducers	1498	0.274386
ENSG00000228302	AL512770.1	Inducers	560	0.257634
ENSG00000228302	AL512770.1	Inducers	584	0.245247
ENSG00000228302	AL512770.1	Inducers	1448	0.246707
ENSG00000228302	AL512770.1	Inducers	367	0.256095
ENSG00000228343	AC115618.2	Inducers	726	0.216482
ENSG00000228343	AC115618.2	Inducers	518	0.177736
ENSG00000228343	AC115618.2	Inducers	176	0.194263
ENSG00000228343	AC115618.2	Inducers	1448	0.204377
ENSG00000228343	AC115618.2	Inducers	560	0.182122
ENSG00000228343	AC115618.2	Inducers	354	0.179026
ENSG00000228343	AC115618.2	Inducers	474	0.223509
ENSG00000228343	AC115618.2	Inducers	329	0.21911
ENSG00000228343	AC115618.2	Inducers	505	0.216102
ENSG00000228343	AC115618.2	Inducers	507	0.202615
ENSG00000228343	AC115618.2	Inducers	471	-0.00654054
ENSG00000228343	AC115618.2	Inducers	1399	0.18505
ENSG00000228343	AC115618.2	Inducers	1639	0.235246
ENSG00000228343	AC115618.2	Inducers	268	0.174673
ENSG00000228352	AL354989.1	Inducers	471	-0.102823
ENSG00000228352	AL354989.1	Inducers	1498	0.251304
ENSG00000228352	AL354989.1	Inducers	505	0.240722
ENSG00000228352	AL354989.1	Inducers	2014	-0.0473782
ENSG00000228352	AL354989.1	Inducers	1399	0.230309
ENSG00000228352	AL354989.1	Inducers	726	0.260098
ENSG00000228352	AL354989.1	Inducers	403	0.26625
ENSG00000228352	AL354989.1	Inducers	474	0.275466
ENSG00000228352	AL354989.1	Inducers	518	0.221577
ENSG00000228352	AL354989.1	Inducers	268	0.231143
ENSG00000228352	AL354989.1	Inducers	1639	0.259458
ENSG00000228352	AL354989.1	Inducers	2592	0.251363
ENSG00000228352	AL354989.1	Inducers	560	0.225779
ENSG00000228352	AL354989.1	Inducers	354	0.240156
ENSG00000228352	AL354989.1	Inducers	329	0.272849
ENSG00000228369	TXNDC12-AS1	Inducers	474	0.202079
ENSG00000228369	TXNDC12-AS1	Inducers	268	0.17732
ENSG00000228369	TXNDC12-AS1	Inducers	505	0.188241
ENSG00000228369	TXNDC12-AS1	Inducers	726	0.201633
ENSG00000228369	TXNDC12-AS1	Inducers	2592	0.20384
ENSG00000228369	TXNDC12-AS1	Inducers	354	0.19993
ENSG00000228369	TXNDC12-AS1	Inducers	1498	0.184361
ENSG00000228369	TXNDC12-AS1	Inducers	471	-0.0858064
ENSG00000228369	TXNDC12-AS1	Inducers	560	0.175068
ENSG00000228369	TXNDC12-AS1	Inducers	1639	0.195994
ENSG00000228369	TXNDC12-AS1	Inducers	1399	0.169964
ENSG00000228369	TXNDC12-AS1	Inducers	403	0.192758
ENSG00000228382	ITPKB-IT1	Inducers	1696	-0.0674297
ENSG00000228382	ITPKB-IT1	Inducers	505	0.256894
ENSG00000228382	ITPKB-IT1	Inducers	268	0.254098
ENSG00000228382	ITPKB-IT1	Inducers	2592	0.21827
ENSG00000228382	ITPKB-IT1	Inducers	354	0.219372
ENSG00000228382	ITPKB-IT1	Inducers	1986	0.203178
ENSG00000228382	ITPKB-IT1	Inducers	1800	-0.0774863
ENSG00000228382	ITPKB-IT1	Inducers	726	0.257389
ENSG00000228382	ITPKB-IT1	Inducers	1498	0.242901
ENSG00000228382	ITPKB-IT1	Inducers	755	0.225491
ENSG00000228382	ITPKB-IT1	Inducers	560	0.237823
ENSG00000228382	ITPKB-IT1	Inducers	507	0.212549
ENSG00000228382	ITPKB-IT1	Inducers	518	0.233997
ENSG00000228382	ITPKB-IT1	Inducers	1765	0.172653
ENSG00000228382	ITPKB-IT1	Inducers	595	0.243314
ENSG00000228382	ITPKB-IT1	Inducers	1779	0.199082
ENSG00000228382	ITPKB-IT1	Inducers	976	0.191769
ENSG00000228382	ITPKB-IT1	Inducers	471	-0.195279
ENSG00000228382	ITPKB-IT1	Inducers	795	0.187185
ENSG00000228382	ITPKB-IT1	Inducers	367	0.195712
ENSG00000228382	ITPKB-IT1	Inducers	403	0.238693
ENSG00000228382	ITPKB-IT1	Inducers	1639	0.235195
ENSG00000228382	ITPKB-IT1	Inducers	559	0.198326
ENSG00000228382	ITPKB-IT1	Inducers	479	0.172378
ENSG00000228382	ITPKB-IT1	Inducers	1580	0.174111
ENSG00000228382	ITPKB-IT1	Inducers	226	0.16627
ENSG00000228382	ITPKB-IT1	Inducers	1201	0.246574
ENSG00000228382	ITPKB-IT1	Inducers	1399	0.251364
ENSG00000228382	ITPKB-IT1	Inducers	2014	-0.165996
ENSG00000228382	ITPKB-IT1	Inducers	223	0.128584
ENSG00000228382	ITPKB-IT1	Inducers	1496	0.25839
ENSG00000228382	ITPKB-IT1	Inducers	1619	0.243726
ENSG00000228382	ITPKB-IT1	Inducers	280	0.234209
ENSG00000228382	ITPKB-IT1	Inducers	1448	0.264306
ENSG00000228382	ITPKB-IT1	Inducers	474	0.260886
ENSG00000228382	ITPKB-IT1	Inducers	1569	0.228033
ENSG00000228382	ITPKB-IT1	Inducers	1526	0.19073
ENSG00000228397	LINC01635	Inducers	1580	0.156093
ENSG00000228397	LINC01635	Inducers	471	-0.136826
ENSG00000228397	LINC01635	Inducers	1779	0.157402
ENSG00000228397	LINC01635	Inducers	1674	0.134181
ENSG00000228397	LINC01635	Inducers	479	0.153052
ENSG00000228397	LINC01635	Inducers	976	0.143007
ENSG00000228397	LINC01635	Inducers	1503	0.137754
ENSG00000228397	LINC01635	Inducers	1448	0.147199
ENSG00000228397	LINC01635	Inducers	1526	0.138937
ENSG00000228397	LINC01635	Inducers	1105	0.159101
ENSG00000228397	LINC01635	Inducers	1986	0.160322
ENSG00000228397	LINC01635	Inducers	559	0.161289
ENSG00000228397	LINC01635	Inducers	935	0.166724
ENSG00000228397	LINC01635	Inducers	1501	0.147268
ENSG00000228397	LINC01635	Inducers	795	0.139269
ENSG00000228397	LINC01635	Inducers	226	0.157037
ENSG00000228397	LINC01635	Inducers	1765	0.155208
ENSG00000228397	LINC01635	Inducers	1168	0.160706
ENSG00000228397	LINC01635	Inducers	367	0.165721
ENSG00000228397	LINC01635	Inducers	1528	0.159871
ENSG00000228397	LINC01635	Inducers	958	0.148387
ENSG00000228397	LINC01635	Inducers	223	0.143471
ENSG00000228434	AC004951.1	Inducers	595	0.248589
ENSG00000228434	AC004951.1	Inducers	268	0.274042
ENSG00000228434	AC004951.1	Inducers	507	0.229938
ENSG00000228434	AC004951.1	Inducers	505	0.253217
ENSG00000228434	AC004951.1	Inducers	1696	-0.0211989
ENSG00000228434	AC004951.1	Inducers	2014	-0.062579
ENSG00000228434	AC004951.1	Inducers	329	0.325499
ENSG00000228434	AC004951.1	Inducers	1800	-0.0351041
ENSG00000228434	AC004951.1	Inducers	403	0.284714
ENSG00000228434	AC004951.1	Inducers	1399	0.267308
ENSG00000228434	AC004951.1	Inducers	492	-0.00625669
ENSG00000228434	AC004951.1	Inducers	474	0.278909
ENSG00000228434	AC004951.1	Inducers	560	0.278235
ENSG00000228434	AC004951.1	Inducers	354	0.259283
ENSG00000228434	AC004951.1	Inducers	176	0.238019
ENSG00000228434	AC004951.1	Inducers	755	0.261021
ENSG00000228434	AC004951.1	Inducers	2592	0.252749
ENSG00000228434	AC004951.1	Inducers	1498	0.268651
ENSG00000228434	AC004951.1	Inducers	726	0.253027
ENSG00000228434	AC004951.1	Inducers	518	0.27381
ENSG00000228434	AC004951.1	Inducers	471	-0.0569013
ENSG00000228485	GRK5-IT1	Inducers	2030	0.152015
ENSG00000228485	GRK5-IT1	Inducers	952	0.138301
ENSG00000228485	GRK5-IT1	Inducers	1674	0.138776
ENSG00000228485	GRK5-IT1	Inducers	958	0.153462
ENSG00000228485	GRK5-IT1	Inducers	226	0.140748
ENSG00000228485	GRK5-IT1	Inducers	367	0.153542
ENSG00000228485	GRK5-IT1	Inducers	584	0.145552
ENSG00000228485	GRK5-IT1	Inducers	1360	0.18959
ENSG00000228485	GRK5-IT1	Inducers	868	0.137173
ENSG00000228485	GRK5-IT1	Inducers	1503	0.134053
ENSG00000228485	GRK5-IT1	Inducers	1501	0.136523
ENSG00000228485	GRK5-IT1	Inducers	757	0.153771
ENSG00000228485	GRK5-IT1	Inducers	1325	0.147012
ENSG00000228485	GRK5-IT1	Inducers	223	0.1521
ENSG00000228485	GRK5-IT1	Inducers	836	0.137535
ENSG00000228485	GRK5-IT1	Inducers	1036	0.138522
ENSG00000228485	GRK5-IT1	Inducers	976	0.143949
ENSG00000228485	GRK5-IT1	Inducers	715	0.0995035
ENSG00000228485	GRK5-IT1	Inducers	479	0.139673
ENSG00000228485	GRK5-IT1	Inducers	1765	0.138687
ENSG00000228485	GRK5-IT1	Inducers	1528	0.141261
ENSG00000228485	GRK5-IT1	Inducers	1870	0.135794
ENSG00000228485	GRK5-IT1	Inducers	779	0.132889
ENSG00000228485	GRK5-IT1	Inducers	176	0.144749
ENSG00000228485	GRK5-IT1	Inducers	1526	0.147633
ENSG00000228485	GRK5-IT1	Inducers	795	0.146915
ENSG00000228485	GRK5-IT1	Inducers	1105	0.136289
ENSG00000228629	AC092295.1	Inducers	505	0.175073
ENSG00000228629	AC092295.1	Inducers	560	0.157509
ENSG00000228629	AC092295.1	Inducers	518	0.157498
ENSG00000228629	AC092295.1	Inducers	471	-0.144154
ENSG00000228629	AC092295.1	Inducers	2014	-0.111791
ENSG00000228629	AC092295.1	Inducers	354	0.166183
ENSG00000228629	AC092295.1	Inducers	1639	0.194968
ENSG00000228629	AC092295.1	Inducers	268	0.159349
ENSG00000228629	AC092295.1	Inducers	2592	0.175893
ENSG00000228629	AC092295.1	Inducers	1800	-0.0701796
ENSG00000228629	AC092295.1	Inducers	1498	0.167487
ENSG00000228629	AC092295.1	Inducers	474	0.194341
ENSG00000228629	AC092295.1	Inducers	1696	-0.0701796
ENSG00000228629	AC092295.1	Inducers	726	0.1871
ENSG00000228629	AC092295.1	Inducers	1399	0.159223
ENSG00000228701	TNKS2-AS1	Inducers	518	0.161509
ENSG00000228701	TNKS2-AS1	Inducers	1399	0.164064
ENSG00000228701	TNKS2-AS1	Inducers	507	0.172426
ENSG00000228701	TNKS2-AS1	Inducers	560	0.158779
ENSG00000228701	TNKS2-AS1	Inducers	268	0.160353
ENSG00000228802	AC073641.1	Inducers	795	0.1714
ENSG00000228802	AC073641.1	Inducers	492	-0.0412484
ENSG00000228802	AC073641.1	Inducers	1696	-0.0281172
ENSG00000228802	AC073641.1	Inducers	354	0.156281
ENSG00000228802	AC073641.1	Inducers	2014	-0.0707546
ENSG00000228802	AC073641.1	Inducers	1781	-0.0180081
ENSG00000228802	AC073641.1	Inducers	1800	-0.0429246
ENSG00000228802	AC073641.1	Inducers	1526	0.163174
ENSG00000228802	AC073641.1	Inducers	2592	0.160293
ENSG00000228802	AC073641.1	Inducers	471	-0.122153
ENSG00000228802	AC073641.1	Inducers	726	0.162714
ENSG00000228817	BACH1-IT2	Inducers	2592	0.190499
ENSG00000228817	BACH1-IT2	Inducers	726	0.164286
ENSG00000228817	BACH1-IT2	Inducers	403	0.169496
ENSG00000228817	BACH1-IT2	Inducers	518	0.167694
ENSG00000228817	BACH1-IT2	Inducers	354	0.18797
ENSG00000228817	BACH1-IT2	Inducers	268	0.175457
ENSG00000228817	BACH1-IT2	Inducers	1696	-0.0468016
ENSG00000228817	BACH1-IT2	Inducers	505	0.160075
ENSG00000228817	BACH1-IT2	Inducers	595	0.170238
ENSG00000228817	BACH1-IT2	Inducers	223	0.151283
ENSG00000228817	BACH1-IT2	Inducers	755	0.15475
ENSG00000228817	BACH1-IT2	Inducers	1399	0.175532
ENSG00000228817	BACH1-IT2	Inducers	492	-0.0468016
ENSG00000228817	BACH1-IT2	Inducers	560	0.176527
ENSG00000228817	BACH1-IT2	Inducers	1800	-0.0598012
ENSG00000228838	AL355483.2	Inducers	1325	0.193736
ENSG00000228838	AL355483.2	Inducers	354	0.237254
ENSG00000228838	AL355483.2	Inducers	1800	-0.0526103
ENSG00000228838	AL355483.2	Inducers	479	0.204021
ENSG00000228838	AL355483.2	Inducers	1399	0.251816
ENSG00000228838	AL355483.2	Inducers	1526	0.25357
ENSG00000228838	AL355483.2	Inducers	518	0.250152
ENSG00000228838	AL355483.2	Inducers	329	0.235346
ENSG00000228838	AL355483.2	Inducers	283	0.227777
ENSG00000228838	AL355483.2	Inducers	715	0.189109
ENSG00000228838	AL355483.2	Inducers	505	0.238426
ENSG00000228838	AL355483.2	Inducers	584	0.219493
ENSG00000228838	AL355483.2	Inducers	1498	0.227494
ENSG00000228838	AL355483.2	Inducers	1569	0.229108
ENSG00000228838	AL355483.2	Inducers	1360	0.200085
ENSG00000228838	AL355483.2	Inducers	223	0.201216
ENSG00000228838	AL355483.2	Inducers	1105	0.191803
ENSG00000228838	AL355483.2	Inducers	795	0.26176
ENSG00000228838	AL355483.2	Inducers	197	0.196202
ENSG00000228838	AL355483.2	Inducers	507	0.217901
ENSG00000228838	AL355483.2	Inducers	1528	0.245337
ENSG00000228838	AL355483.2	Inducers	1168	0.189139
ENSG00000228838	AL355483.2	Inducers	2592	0.282205
ENSG00000228838	AL355483.2	Inducers	1501	0.204492
ENSG00000228838	AL355483.2	Inducers	544	0.215068
ENSG00000228838	AL355483.2	Inducers	836	0.200085
ENSG00000228838	AL355483.2	Inducers	581	0.219772
ENSG00000228838	AL355483.2	Inducers	560	0.252427
ENSG00000228838	AL355483.2	Inducers	2030	0.210059
ENSG00000228838	AL355483.2	Inducers	492	-0.016637
ENSG00000228838	AL355483.2	Inducers	1496	0.244521
ENSG00000228838	AL355483.2	Inducers	367	0.239808
ENSG00000228838	AL355483.2	Inducers	403	0.233572
ENSG00000228838	AL355483.2	Inducers	1503	0.199366
ENSG00000228838	AL355483.2	Inducers	755	0.274978
ENSG00000228838	AL355483.2	Inducers	1036	0.188252
ENSG00000228838	AL355483.2	Inducers	1639	0.24842
ENSG00000228838	AL355483.2	Inducers	1696	-0.0404219
ENSG00000228838	AL355483.2	Inducers	471	-0.117801
ENSG00000228838	AL355483.2	Inducers	1870	0.180182
ENSG00000228838	AL355483.2	Inducers	868	0.197773
ENSG00000228838	AL355483.2	Inducers	726	0.232726
ENSG00000228838	AL355483.2	Inducers	1779	0.179328
ENSG00000228838	AL355483.2	Inducers	1674	0.177764
ENSG00000228838	AL355483.2	Inducers	268	0.25848
ENSG00000228838	AL355483.2	Inducers	176	0.231442
ENSG00000228838	AL355483.2	Inducers	1580	0.188637
ENSG00000228838	AL355483.2	Inducers	1765	0.187781
ENSG00000228838	AL355483.2	Inducers	226	0.181865
ENSG00000228838	AL355483.2	Inducers	474	0.234181
ENSG00000228838	AL355483.2	Inducers	1448	0.296041
ENSG00000228838	AL355483.2	Inducers	976	0.268646
ENSG00000228838	AL355483.2	Inducers	952	0.216028
ENSG00000228838	AL355483.2	Inducers	779	0.211892
ENSG00000228838	AL355483.2	Inducers	958	0.247338
ENSG00000228889	UBAC2-AS1	Inducers	1013	0.183018
ENSG00000228889	UBAC2-AS1	Inducers	1496	0.174181
ENSG00000228889	UBAC2-AS1	Inducers	1168	0.17158
ENSG00000228889	UBAC2-AS1	Inducers	1424	0.174535
ENSG00000228889	UBAC2-AS1	Inducers	518	0.16018
ENSG00000228889	UBAC2-AS1	Inducers	560	0.158016
ENSG00000228889	UBAC2-AS1	Inducers	755	0.168341
ENSG00000228906	AL353804.1	Inducers	474	0.242376
ENSG00000228906	AL353804.1	Inducers	1639	0.22718
ENSG00000228906	AL353804.1	Inducers	329	0.231377
ENSG00000228906	AL353804.1	Inducers	505	0.2229
ENSG00000228906	AL353804.1	Inducers	471	-0.0394393
ENSG00000228906	AL353804.1	Inducers	726	0.227902
ENSG00000229587	AL158825.2	Inducers	354	0.211422
ENSG00000229587	AL158825.2	Inducers	560	0.207482
ENSG00000229587	AL158825.2	Inducers	492	-0.0754699
ENSG00000229587	AL158825.2	Inducers	1696	-0.0777335
ENSG00000229587	AL158825.2	Inducers	726	0.254413
ENSG00000229587	AL158825.2	Inducers	755	0.252261
ENSG00000229587	AL158825.2	Inducers	367	0.179104
ENSG00000229587	AL158825.2	Inducers	795	0.214556
ENSG00000229587	AL158825.2	Inducers	958	0.228095
ENSG00000229587	AL158825.2	Inducers	474	0.260625
ENSG00000229587	AL158825.2	Inducers	1800	-0.0863453
ENSG00000229587	AL158825.2	Inducers	403	0.219828
ENSG00000229587	AL158825.2	Inducers	176	0.199044
ENSG00000229587	AL158825.2	Inducers	595	0.220464
ENSG00000229587	AL158825.2	Inducers	505	0.237536
ENSG00000229587	AL158825.2	Inducers	268	0.21323
ENSG00000229587	AL158825.2	Inducers	471	-0.125936
ENSG00000229587	AL158825.2	Inducers	1448	0.238406
ENSG00000229587	AL158825.2	Inducers	1639	0.258045
ENSG00000229587	AL158825.2	Inducers	507	0.196477
ENSG00000229587	AL158825.2	Inducers	1526	0.209851
ENSG00000229587	AL158825.2	Inducers	2592	0.232413
ENSG00000229587	AL158825.2	Inducers	1498	0.237536
ENSG00000229587	AL158825.2	Inducers	329	0.222246
ENSG00000229587	AL158825.2	Inducers	1399	0.214843
ENSG00000229587	AL158825.2	Inducers	1569	0.211152
ENSG00000229587	AL158825.2	Inducers	518	0.206772
ENSG00000229587	AL158825.2	Inducers	1496	0.230199
ENSG00000229587	AL158825.2	Inducers	1201	0.210247
ENSG00000229587	AL158825.2	Inducers	976	0.200771
ENSG00000229587	AL158825.2	Inducers	280	0.217416
ENSG00000229832	AL360091.1	Inducers	505	0.196058
ENSG00000229832	AL360091.1	Inducers	474	0.222406
ENSG00000229832	AL360091.1	Inducers	507	0.187033
ENSG00000229832	AL360091.1	Inducers	726	0.210114
ENSG00000229832	AL360091.1	Inducers	1526	0.195938
ENSG00000229832	AL360091.1	Inducers	518	0.193207
ENSG00000229832	AL360091.1	Inducers	1639	0.220876
ENSG00000229832	AL360091.1	Inducers	367	0.18882
ENSG00000229832	AL360091.1	Inducers	354	0.201653
ENSG00000229832	AL360091.1	Inducers	492	-0.0816009
ENSG00000229832	AL360091.1	Inducers	1781	-0.0269054
ENSG00000229832	AL360091.1	Inducers	1399	0.189769
ENSG00000229832	AL360091.1	Inducers	471	-0.124437
ENSG00000229832	AL360091.1	Inducers	268	0.197127
ENSG00000229832	AL360091.1	Inducers	1696	-0.0829598
ENSG00000229832	AL360091.1	Inducers	560	0.20059
ENSG00000229832	AL360091.1	Inducers	958	0.198004
ENSG00000229832	AL360091.1	Inducers	1800	-0.0829598
ENSG00000229832	AL360091.1	Inducers	2592	0.203787
ENSG00000229832	AL360091.1	Inducers	329	0.223155
ENSG00000229832	AL360091.1	Inducers	1498	0.202441
ENSG00000229832	AL360091.1	Inducers	795	0.205922
ENSG00000229832	AL360091.1	Inducers	403	0.221072
ENSG00000229832	AL360091.1	Inducers	2014	-0.118753
ENSG00000229832	AL360091.1	Inducers	976	0.192807
ENSG00000229983	AL606468.1	Inducers	268	0.198121
ENSG00000229983	AL606468.1	Inducers	2592	0.191336
ENSG00000229983	AL606468.1	Inducers	1503	0.158068
ENSG00000229983	AL606468.1	Inducers	1448	0.207849
ENSG00000229983	AL606468.1	Inducers	755	0.186183
ENSG00000229983	AL606468.1	Inducers	1399	0.192785
ENSG00000229983	AL606468.1	Inducers	1639	0.179903
ENSG00000229983	AL606468.1	Inducers	471	-0.118812
ENSG00000229983	AL606468.1	Inducers	779	0.158693
ENSG00000229983	AL606468.1	Inducers	560	0.198128
ENSG00000229983	AL606468.1	Inducers	403	0.194159
ENSG00000229983	AL606468.1	Inducers	505	0.174164
ENSG00000229983	AL606468.1	Inducers	507	0.194697
ENSG00000229983	AL606468.1	Inducers	518	0.1997
ENSG00000229983	AL606468.1	Inducers	1360	0.185501
ENSG00000229983	AL606468.1	Inducers	223	0.141943
ENSG00000229983	AL606468.1	Inducers	726	0.176013
ENSG00000229983	AL606468.1	Inducers	474	0.177458
ENSG00000229983	AL606468.1	Inducers	581	0.189195
ENSG00000229983	AL606468.1	Inducers	1496	0.183069
ENSG00000229983	AL606468.1	Inducers	354	0.1751
ENSG00000229983	AL606468.1	Inducers	1498	0.179967
ENSG00000230002	ALMS1-IT1	Inducers	268	0.162432
ENSG00000230002	ALMS1-IT1	Inducers	518	0.16949
ENSG00000230002	ALMS1-IT1	Inducers	560	0.164584
[truncated: 32,228 more rows]
