# Supplementary material for: Systematic lncRNA mapping to genome-wide co-essential modules uncovers cancer dependency on uncharacterized lncRNAs
Source: eLife. 2022 Jun 13;11:e77357. doi: 10.7554/eLife.77357 (PMC9191893; doi:10.7554/eLife.77357)
Supplement: Figure 2—source data 1. [file elife-77357-fig2-data1.xlsx]

## Sheet: Figure 2-source data 1
Figure 2-source data 1: The number of lncRNAs predicted to regulate different Hallmark categories in a specific cancer type.											Mitra et al.
TCGA cancer types	Hallmark categories	Number of lncRNAs
BLCA	cellular component	17
BLCA	development	71
BLCA	DNA damage	38
BLCA	immune	70
BLCA	metabolic	73
BLCA	pathway	38
BLCA	proliferation	145
BLCA	signaling	91
BRCA	cellular component	13
BRCA	development	85
BRCA	DNA damage	31
BRCA	immune	38
BRCA	metabolic	94
BRCA	pathway	68
BRCA	proliferation	170
BRCA	signaling	137
HNSC	cellular component	34
HNSC	development	66
HNSC	DNA damage	52
HNSC	immune	57
HNSC	metabolic	58
HNSC	pathway	36
HNSC	proliferation	139
HNSC	signaling	74
KIRC	cellular component	32
KIRC	development	77
KIRC	DNA damage	41
KIRC	immune	31
KIRC	metabolic	144
KIRC	pathway	97
KIRC	proliferation	93
KIRC	signaling	65
LIHC	cellular component	41
LIHC	development	107
LIHC	DNA damage	41
LIHC	immune	46
LIHC	metabolic	148
LIHC	pathway	38
LIHC	proliferation	107
LIHC	signaling	30
LUAD	cellular component	19
LUAD	development	76
LUAD	DNA damage	32
LUAD	immune	49
LUAD	metabolic	99
LUAD	pathway	56
LUAD	proliferation	192
LUAD	signaling	84
OV	cellular component	11
OV	development	68
OV	DNA damage	101
OV	immune	80
OV	metabolic	124
OV	pathway	38
OV	proliferation	170
OV	signaling	84
SKCM	cellular component	3
SKCM	development	69
SKCM	DNA damage	27
SKCM	immune	36
SKCM	metabolic	99
SKCM	pathway	34
SKCM	proliferation	111
SKCM	signaling	39
STAD	cellular component	12
STAD	development	110
STAD	DNA damage	57
STAD	immune	63
STAD	metabolic	107
STAD	pathway	47
STAD	proliferation	165
STAD	signaling	70
UCEC	cellular component	2
UCEC	development	6
UCEC	DNA damage	4
UCEC	immune	15
UCEC	metabolic	24
UCEC	pathway	10
UCEC	proliferation	42
UCEC	signaling	11
