# Supplementary material for: Systematic lncRNA mapping to genome-wide co-essential modules uncovers cancer dependency on uncharacterized lncRNAs
Source: eLife. 2022 Jun 13;11:e77357. doi: 10.7554/eLife.77357 (PMC9191893; doi:10.7554/eLife.77357)
Supplement: Figure 2—source data 2. [file elife-77357-fig2-data2.xlsx]

## Sheet: Figure 2-source data 2
Figure 2-source data 2: The number of cell line-based predicted proliferation-regulating lncRNAs that potentially alter proliferation signatures across TCGA cancer types.									Mitra et al.
lncRNA categories	Cancer types	Number of lncRNAs	Total number of lncRNAs	Percentage of lncRNAs
Predicted proliferation suppressing lncRNAs that induce proliferation	BLCA	15	252	5.95238
Predicted proliferation suppressing lncRNAs that induce proliferation	BRCA	13	252	5.15873
Predicted proliferation suppressing lncRNAs that induce proliferation	HNSC	37	252	14.6825
Predicted proliferation suppressing lncRNAs that induce proliferation	KIRC	20	252	7.93651
Predicted proliferation suppressing lncRNAs that induce proliferation	LIHC	34	252	13.4921
Predicted proliferation suppressing lncRNAs that induce proliferation	LUAD	22	252	8.73016
Predicted proliferation suppressing lncRNAs that induce proliferation	OV	44	252	17.4603
Predicted proliferation suppressing lncRNAs that induce proliferation	SKCM	9	252	3.57143
Predicted proliferation suppressing lncRNAs that induce proliferation	STAD	39	252	15.4762
Predicted proliferation suppressing lncRNAs that induce proliferation	UCEC	2	252	0.793651
Predicted proliferation suppressing lncRNAs that suppress proliferation	BLCA	92	252	36.5079
Predicted proliferation suppressing lncRNAs that suppress proliferation	BRCA	110	252	43.6508
Predicted proliferation suppressing lncRNAs that suppress proliferation	HNSC	53	252	21.0317
Predicted proliferation suppressing lncRNAs that suppress proliferation	KIRC	52	252	20.6349
Predicted proliferation suppressing lncRNAs that suppress proliferation	LIHC	22	252	8.73016
Predicted proliferation suppressing lncRNAs that suppress proliferation	LUAD	119	252	47.2222
Predicted proliferation suppressing lncRNAs that suppress proliferation	OV	97	252	38.4921
Predicted proliferation suppressing lncRNAs that suppress proliferation	SKCM	54	252	21.4286
Predicted proliferation suppressing lncRNAs that suppress proliferation	STAD	78	252	30.9524
Predicted proliferation suppressing lncRNAs that suppress proliferation	UCEC	18	252	7.14286
Predicted proliferation inducing lncRNAs that induce proliferation	BLCA	44	123	35.7724
Predicted proliferation inducing lncRNAs that induce proliferation	BRCA	41	123	33.3333
Predicted proliferation inducing lncRNAs that induce proliferation	HNSC	53	123	43.0894
Predicted proliferation inducing lncRNAs that induce proliferation	KIRC	21	123	17.0732
Predicted proliferation inducing lncRNAs that induce proliferation	LIHC	50	123	40.6504
Predicted proliferation inducing lncRNAs that induce proliferation	LUAD	35	123	28.4553
Predicted proliferation inducing lncRNAs that induce proliferation	OV	56	123	45.5285
Predicted proliferation inducing lncRNAs that induce proliferation	SKCM	47	123	38.2114
Predicted proliferation inducing lncRNAs that induce proliferation	STAD	64	123	52.0325
Predicted proliferation inducing lncRNAs that induce proliferation	UCEC	22	123	17.8862
Predicted proliferation inducing lncRNAs that suppress proliferation	BLCA	7	123	5.69106
Predicted proliferation inducing lncRNAs that suppress proliferation	BRCA	11	123	8.94309
Predicted proliferation inducing lncRNAs that suppress proliferation	HNSC	6	123	4.87805
Predicted proliferation inducing lncRNAs that suppress proliferation	KIRC	4	123	3.25203
Predicted proliferation inducing lncRNAs that suppress proliferation	LIHC	3	123	2.43902
Predicted proliferation inducing lncRNAs that suppress proliferation	LUAD	26	123	21.1382
Predicted proliferation inducing lncRNAs that suppress proliferation	OV	16	123	13.0081
Predicted proliferation inducing lncRNAs that suppress proliferation	SKCM	4	123	3.25203
Predicted proliferation inducing lncRNAs that suppress proliferation	STAD	2	123	1.62602
