# Supplementary material for: Systematic lncRNA mapping to genome-wide co-essential modules uncovers cancer dependency on uncharacterized lncRNAs
Source: eLife. 2022 Jun 13;11:e77357. doi: 10.7554/eLife.77357 (PMC9191893; doi:10.7554/eLife.77357)
Supplement: Figure 2—source data 3. [file elife-77357-fig2-data3.xlsx]

## Sheet: Figure 2-source data 3
Figure 2-source data 3: Cell line-based predicted proliferation-regulating lncRNAs that have significant (FDR<0.05) differential expression in TCGA patients with higher proliferation activity compared to the patients with lower proliferation activity.
Ensembl ID	Fold-change (log2)	FDR	Cancer type	lncRNA categories		Mitra et al.
ENSG00000146666	-1.14384	0.00496285	BLCA	Predicted proliferation supprssing lncRNAs
ENSG00000175147	-1.74171	3.82373e-07	BLCA	Predicted proliferation supprssing lncRNAs
ENSG00000185186	0.808009	0.015481	BLCA	Predicted proliferation supprssing lncRNAs
ENSG00000186056	-0.793185	0.000394683	BLCA	Predicted proliferation supprssing lncRNAs
ENSG00000188660	0.71786	0.0410808	BLCA	Predicted proliferation supprssing lncRNAs
ENSG00000205488	1.36854	0.00910676	BLCA	Predicted proliferation supprssing lncRNAs
ENSG00000224596	-0.552828	0.0119204	BLCA	Predicted proliferation supprssing lncRNAs
ENSG00000224805	-0.831528	0.0037481	BLCA	Predicted proliferation supprssing lncRNAs
ENSG00000224818	-1.13298	1.58718e-06	BLCA	Predicted proliferation supprssing lncRNAs
ENSG00000225330	-0.864885	0.00728843	BLCA	Predicted proliferation supprssing lncRNAs
ENSG00000226026	-0.941285	2.9686e-05	BLCA	Predicted proliferation supprssing lncRNAs
ENSG00000226332	-1.02952	0.000184656	BLCA	Predicted proliferation supprssing lncRNAs
ENSG00000226386	-1.14632	0.000306988	BLCA	Predicted proliferation supprssing lncRNAs
ENSG00000227192	-0.728148	0.0396567	BLCA	Predicted proliferation supprssing lncRNAs
ENSG00000228288	-0.530653	0.0221277	BLCA	Predicted proliferation supprssing lncRNAs
ENSG00000228526	-1.28882	6.65075e-06	BLCA	Predicted proliferation supprssing lncRNAs
ENSG00000228791	-1.01089	1.79319e-05	BLCA	Predicted proliferation supprssing lncRNAs
ENSG00000229017	-0.802112	0.0008228	BLCA	Predicted proliferation supprssing lncRNAs
ENSG00000229647	2.58915	3.86173e-08	BLCA	Predicted proliferation supprssing lncRNAs
ENSG00000229931	0.616662	0.0338604	BLCA	Predicted proliferation supprssing lncRNAs
ENSG00000229951	-0.840373	0.00454595	BLCA	Predicted proliferation supprssing lncRNAs
ENSG00000230479	0.940923	0.0209319	BLCA	Predicted proliferation supprssing lncRNAs
ENSG00000230939	-0.767037	0.00607573	BLCA	Predicted proliferation supprssing lncRNAs
ENSG00000230943	-1.06577	0.0178218	BLCA	Predicted proliferation supprssing lncRNAs
ENSG00000231160	-1.37255	4.28748e-05	BLCA	Predicted proliferation supprssing lncRNAs
ENSG00000231312	-0.839068	1.04099e-07	BLCA	Predicted proliferation supprssing lncRNAs
ENSG00000231713	-1.24786	0.00035284	BLCA	Predicted proliferation supprssing lncRNAs
ENSG00000232453	0.579283	0.047046	BLCA	Predicted proliferation supprssing lncRNAs
ENSG00000232679	1.80334	0.000499611	BLCA	Predicted proliferation supprssing lncRNAs
ENSG00000233006	-0.699681	0.000604497	BLCA	Predicted proliferation supprssing lncRNAs
ENSG00000233077	1.54831	5.29427e-08	BLCA	Predicted proliferation supprssing lncRNAs
ENSG00000233895	0.78631	0.0141849	BLCA	Predicted proliferation supprssing lncRNAs
ENSG00000234546	-1.68187	4.64631e-09	BLCA	Predicted proliferation supprssing lncRNAs
ENSG00000234807	-0.562839	0.0389243	BLCA	Predicted proliferation supprssing lncRNAs
ENSG00000234869	0.657677	0.036674	BLCA	Predicted proliferation supprssing lncRNAs
ENSG00000235385	1.64483	0.0136151	BLCA	Predicted proliferation supprssing lncRNAs
ENSG00000235947	0.83253	0.024654	BLCA	Predicted proliferation supprssing lncRNAs
ENSG00000236039	-2.01501	0.00011922	BLCA	Predicted proliferation supprssing lncRNAs
ENSG00000236064	0.924699	0.00100398	BLCA	Predicted proliferation supprssing lncRNAs
ENSG00000236318	-4.4269	2.87658e-10	BLCA	Predicted proliferation supprssing lncRNAs
ENSG00000236384	-0.97755	0.00248721	BLCA	Predicted proliferation supprssing lncRNAs
ENSG00000236830	-0.811703	0.000116809	BLCA	Predicted proliferation supprssing lncRNAs
ENSG00000237512	-1.27777	0.000820341	BLCA	Predicted proliferation supprssing lncRNAs
ENSG00000237807	-1.40798	0.000762269	BLCA	Predicted proliferation supprssing lncRNAs
ENSG00000238279	-1.3644	5.46439e-05	BLCA	Predicted proliferation supprssing lncRNAs
ENSG00000240032	1.6959	9.94789e-08	BLCA	Predicted proliferation supprssing lncRNAs
ENSG00000242861	-1.47514	1.13008e-11	BLCA	Predicted proliferation supprssing lncRNAs
ENSG00000244041	-0.731835	8.14379e-06	BLCA	Predicted proliferation supprssing lncRNAs
ENSG00000244198	-0.455453	0.0180089	BLCA	Predicted proliferation supprssing lncRNAs
ENSG00000244479	-0.823221	4.37578e-05	BLCA	Predicted proliferation supprssing lncRNAs
ENSG00000244541	-2.28604	1.71931e-05	BLCA	Predicted proliferation supprssing lncRNAs
ENSG00000245532	-0.810096	0.0012874	BLCA	Predicted proliferation supprssing lncRNAs
ENSG00000245573	-0.960152	0.000295927	BLCA	Predicted proliferation supprssing lncRNAs
ENSG00000247317	0.606614	0.0425955	BLCA	Predicted proliferation supprssing lncRNAs
ENSG00000248429	-0.860775	0.0193835	BLCA	Predicted proliferation supprssing lncRNAs
ENSG00000250303	0.755232	0.0108131	BLCA	Predicted proliferation supprssing lncRNAs
ENSG00000250608	-1.14913	2.57591e-07	BLCA	Predicted proliferation supprssing lncRNAs
ENSG00000250786	-1.85542	4.61818e-06	BLCA	Predicted proliferation supprssing lncRNAs
ENSG00000251179	-0.673114	0.0309828	BLCA	Predicted proliferation supprssing lncRNAs
ENSG00000251396	0.583569	0.00797055	BLCA	Predicted proliferation supprssing lncRNAs
ENSG00000251432	-1.11431	3.8672e-05	BLCA	Predicted proliferation supprssing lncRNAs
ENSG00000251562	-0.731651	0.000181289	BLCA	Predicted proliferation supprssing lncRNAs
ENSG00000253552	-1.64694	3.72798e-06	BLCA	Predicted proliferation supprssing lncRNAs
ENSG00000253671	-1.25043	0.000717157	BLCA	Predicted proliferation supprssing lncRNAs
ENSG00000254109	-1.68068	6.49966e-09	BLCA	Predicted proliferation supprssing lncRNAs
ENSG00000254554	0.854179	0.000827342	BLCA	Predicted proliferation supprssing lncRNAs
ENSG00000254847	-1.26503	5.86905e-05	BLCA	Predicted proliferation supprssing lncRNAs
ENSG00000255306	-0.673419	0.00366786	BLCA	Predicted proliferation supprssing lncRNAs
ENSG00000255471	-0.980819	0.0001134	BLCA	Predicted proliferation supprssing lncRNAs
ENSG00000256894	-1.24661	0.000587553	BLCA	Predicted proliferation supprssing lncRNAs
ENSG00000257038	-1.05323	0.000202705	BLCA	Predicted proliferation supprssing lncRNAs
ENSG00000257671	-2.53043	2.08524e-05	BLCA	Predicted proliferation supprssing lncRNAs
ENSG00000257829	1.16184	0.00731705	BLCA	Predicted proliferation supprssing lncRNAs
ENSG00000258711	-0.927206	0.00725705	BLCA	Predicted proliferation supprssing lncRNAs
ENSG00000258789	0.577214	0.0320419	BLCA	Predicted proliferation supprssing lncRNAs
ENSG00000258793	1.07177	0.00126294	BLCA	Predicted proliferation supprssing lncRNAs
ENSG00000258955	-0.944049	0.0430099	BLCA	Predicted proliferation supprssing lncRNAs
ENSG00000259005	1.14692	0.000217864	BLCA	Predicted proliferation supprssing lncRNAs
ENSG00000259146	0.69138	0.00460789	BLCA	Predicted proliferation supprssing lncRNAs
ENSG00000260077	0.498605	0.0298463	BLCA	Predicted proliferation supprssing lncRNAs
ENSG00000260118	-1.23395	3.09906e-05	BLCA	Predicted proliferation supprssing lncRNAs
ENSG00000260160	-0.685434	0.00111038	BLCA	Predicted proliferation supprssing lncRNAs
ENSG00000260633	0.740646	0.0157135	BLCA	Predicted proliferation supprssing lncRNAs
ENSG00000260911	-1.06434	0.000552949	BLCA	Predicted proliferation supprssing lncRNAs
ENSG00000260971	-0.505952	0.0410336	BLCA	Predicted proliferation supprssing lncRNAs
ENSG00000261051	1.02859	0.000404066	BLCA	Predicted proliferation supprssing lncRNAs
ENSG00000261656	-0.898092	0.00421288	BLCA	Predicted proliferation supprssing lncRNAs
ENSG00000261888	-1.25678	0.000235781	BLCA	Predicted proliferation supprssing lncRNAs
ENSG00000263718	-2.48379	4.15589e-09	BLCA	Predicted proliferation supprssing lncRNAs
ENSG00000265413	-1.56437	1.9746e-06	BLCA	Predicted proliferation supprssing lncRNAs
ENSG00000266970	0.811342	0.0112827	BLCA	Predicted proliferation supprssing lncRNAs
ENSG00000267082	-0.812548	0.000158288	BLCA	Predicted proliferation supprssing lncRNAs
ENSG00000267519	-0.517741	0.0352903	BLCA	Predicted proliferation supprssing lncRNAs
ENSG00000269976	-0.930672	0.00606904	BLCA	Predicted proliferation supprssing lncRNAs
ENSG00000270210	-1.11737	4.42227e-05	BLCA	Predicted proliferation supprssing lncRNAs
ENSG00000270557	-0.61618	0.0251944	BLCA	Predicted proliferation supprssing lncRNAs
ENSG00000271259	-1.87922	4.05628e-09	BLCA	Predicted proliferation supprssing lncRNAs
ENSG00000271324	-0.762803	2.19475e-05	BLCA	Predicted proliferation supprssing lncRNAs
ENSG00000271327	-1.39216	1.26265e-06	BLCA	Predicted proliferation supprssing lncRNAs
ENSG00000271344	-1.02703	0.000641304	BLCA	Predicted proliferation supprssing lncRNAs
ENSG00000272482	-0.863108	0.0170046	BLCA	Predicted proliferation supprssing lncRNAs
ENSG00000272512	-0.961718	0.0142638	BLCA	Predicted proliferation supprssing lncRNAs
ENSG00000272953	-0.969009	0.000229745	BLCA	Predicted proliferation supprssing lncRNAs
ENSG00000273113	-1.15589	0.000632541	BLCA	Predicted proliferation supprssing lncRNAs
ENSG00000273305	-1.02773	0.00655254	BLCA	Predicted proliferation supprssing lncRNAs
ENSG00000273443	0.806914	0.0358377	BLCA	Predicted proliferation supprssing lncRNAs
ENSG00000163597	0.85153	1.68488e-11	BLCA	Predicted proliferation inducing lncRNAs
ENSG00000203362	0.52323	0.00053704	BLCA	Predicted proliferation inducing lncRNAs
ENSG00000215417	0.786501	0.000355588	BLCA	Predicted proliferation inducing lncRNAs
ENSG00000224635	0.592051	0.0471338	BLCA	Predicted proliferation inducing lncRNAs
ENSG00000224738	1.16356	1.44492e-06	BLCA	Predicted proliferation inducing lncRNAs
ENSG00000225675	1.62898	2.20134e-08	BLCA	Predicted proliferation inducing lncRNAs
ENSG00000226688	0.751243	1.01351e-06	BLCA	Predicted proliferation inducing lncRNAs
ENSG00000226950	-0.522806	0.0104884	BLCA	Predicted proliferation inducing lncRNAs
ENSG00000227598	0.698158	0.00755207	BLCA	Predicted proliferation inducing lncRNAs
ENSG00000227963	0.730155	2.48733e-06	BLCA	Predicted proliferation inducing lncRNAs
ENSG00000231607	0.646021	0.00145744	BLCA	Predicted proliferation inducing lncRNAs
ENSG00000232956	0.562998	1.77691e-05	BLCA	Predicted proliferation inducing lncRNAs
ENSG00000234129	1.35872	4.35155e-14	BLCA	Predicted proliferation inducing lncRNAs
ENSG00000234160	1.47619	1.55808e-10	BLCA	Predicted proliferation inducing lncRNAs
ENSG00000234171	0.657852	0.000982122	BLCA	Predicted proliferation inducing lncRNAs
ENSG00000234264	1.86197	2.83508e-14	BLCA	Predicted proliferation inducing lncRNAs
ENSG00000234327	0.823108	0.00148371	BLCA	Predicted proliferation inducing lncRNAs
ENSG00000234753	1.28665	0.000202193	BLCA	Predicted proliferation inducing lncRNAs
ENSG00000245248	1.42048	1.30905e-08	BLCA	Predicted proliferation inducing lncRNAs
ENSG00000249655	0.749486	0.00670896	BLCA	Predicted proliferation inducing lncRNAs
ENSG00000254694	1.01723	0.00143994	BLCA	Predicted proliferation inducing lncRNAs
ENSG00000255121	1.33558	2.44503e-08	BLCA	Predicted proliferation inducing lncRNAs
ENSG00000255717	0.671505	5.29366e-06	BLCA	Predicted proliferation inducing lncRNAs
ENSG00000257167	1.62369	6.43768e-15	BLCA	Predicted proliferation inducing lncRNAs
ENSG00000258017	1.08163	0.000271142	BLCA	Predicted proliferation inducing lncRNAs
ENSG00000258857	1.0691	0.00233731	BLCA	Predicted proliferation inducing lncRNAs
ENSG00000259093	0.748688	0.00035766	BLCA	Predicted proliferation inducing lncRNAs
ENSG00000260213	0.494408	0.00725705	BLCA	Predicted proliferation inducing lncRNAs
ENSG00000260773	-0.663846	0.00841383	BLCA	Predicted proliferation inducing lncRNAs
ENSG00000262222	1.35421	3.27525e-06	BLCA	Predicted proliferation inducing lncRNAs
ENSG00000262703	1.3312	1.66732e-06	BLCA	Predicted proliferation inducing lncRNAs
ENSG00000263013	0.662733	0.00141529	BLCA	Predicted proliferation inducing lncRNAs
ENSG00000263731	0.885636	2.95957e-07	BLCA	Predicted proliferation inducing lncRNAs
ENSG00000266469	-0.811007	0.0415018	BLCA	Predicted proliferation inducing lncRNAs
ENSG00000266969	0.963862	0.000213733	BLCA	Predicted proliferation inducing lncRNAs
ENSG00000267040	0.421159	0.0369875	BLCA	Predicted proliferation inducing lncRNAs
ENSG00000269534	0.674603	0.0352903	BLCA	Predicted proliferation inducing lncRNAs
ENSG00000269688	0.754446	0.0129689	BLCA	Predicted proliferation inducing lncRNAs
ENSG00000269974	0.978526	5.15288e-06	BLCA	Predicted proliferation inducing lncRNAs
ENSG00000273162	0.787668	0.000192515	BLCA	Predicted proliferation inducing lncRNAs
ENSG00000185186	-0.337324	0.00496535	BRCA	Predicted proliferation supprssing lncRNAs
ENSG00000186056	-0.514729	3.2212e-07	BRCA	Predicted proliferation supprssing lncRNAs
ENSG00000198221	0.574413	3.60566e-06	BRCA	Predicted proliferation supprssing lncRNAs
ENSG00000204054	-0.571572	3.4178e-15	BRCA	Predicted proliferation supprssing lncRNAs
ENSG00000214145	-0.32744	0.0323012	BRCA	Predicted proliferation supprssing lncRNAs
ENSG00000215244	-0.86053	7.3676e-13	BRCA	Predicted proliferation supprssing lncRNAs
ENSG00000223685	-0.732765	4.47159e-08	BRCA	Predicted proliferation supprssing lncRNAs
ENSG00000224805	-0.999907	4.03209e-15	BRCA	Predicted proliferation supprssing lncRNAs
ENSG00000224818	-0.831423	5.48973e-15	BRCA	Predicted proliferation supprssing lncRNAs
ENSG00000224897	-0.394139	0.000288571	BRCA	Predicted proliferation supprssing lncRNAs
ENSG00000225302	-0.821498	3.39986e-20	BRCA	Predicted proliferation supprssing lncRNAs
ENSG00000225506	-0.507571	2.87279e-05	BRCA	Predicted proliferation supprssing lncRNAs
ENSG00000225511	-1.27375	5.29413e-23	BRCA	Predicted proliferation supprssing lncRNAs
ENSG00000226026	-0.613789	1.65322e-11	BRCA	Predicted proliferation supprssing lncRNAs
ENSG00000227192	-0.481066	0.000819286	BRCA	Predicted proliferation supprssing lncRNAs
ENSG00000227533	-0.232399	0.0387305	BRCA	Predicted proliferation supprssing lncRNAs
ENSG00000228288	0.74499	1.22757e-11	BRCA	Predicted proliferation supprssing lncRNAs
ENSG00000228526	-0.812294	2.26506e-11	BRCA	Predicted proliferation supprssing lncRNAs
ENSG00000228791	-0.61243	3.89158e-11	BRCA	Predicted proliferation supprssing lncRNAs
ENSG00000228812	-0.522938	0.00876873	BRCA	Predicted proliferation supprssing lncRNAs
ENSG00000229109	-1.35713	1.64471e-22	BRCA	Predicted proliferation supprssing lncRNAs
ENSG00000229647	-0.5598	1.17191e-05	BRCA	Predicted proliferation supprssing lncRNAs
ENSG00000229931	-0.77107	9.3629e-09	BRCA	Predicted proliferation supprssing lncRNAs
ENSG00000230479	-0.640372	1.24392e-05	BRCA	Predicted proliferation supprssing lncRNAs
ENSG00000230939	-0.712319	2.15751e-11	BRCA	Predicted proliferation supprssing lncRNAs
ENSG00000230943	0.359694	0.016805	BRCA	Predicted proliferation supprssing lncRNAs
ENSG00000231160	-1.06313	3.0652e-16	BRCA	Predicted proliferation supprssing lncRNAs
ENSG00000231312	-0.510639	5.47058e-15	BRCA	Predicted proliferation supprssing lncRNAs
ENSG00000231324	0.63272	0.0153301	BRCA	Predicted proliferation supprssing lncRNAs
ENSG00000231367	0.662949	0.0025521	BRCA	Predicted proliferation supprssing lncRNAs
ENSG00000231574	-0.641748	0.00579365	BRCA	Predicted proliferation supprssing lncRNAs
ENSG00000231948	-0.343229	0.0113362	BRCA	Predicted proliferation supprssing lncRNAs
ENSG00000231969	-0.667544	2.05862e-05	BRCA	Predicted proliferation supprssing lncRNAs
ENSG00000232453	-0.366057	4.51651e-05	BRCA	Predicted proliferation supprssing lncRNAs
ENSG00000232536	-0.816255	7.85893e-08	BRCA	Predicted proliferation supprssing lncRNAs
ENSG00000233006	-1.20341	1.1314e-31	BRCA	Predicted proliferation supprssing lncRNAs
ENSG00000233030	0.655851	7.58886e-05	BRCA	Predicted proliferation supprssing lncRNAs
ENSG00000233077	0.744909	7.98777e-08	BRCA	Predicted proliferation supprssing lncRNAs
ENSG00000233237	-2.05068	3.7782e-27	BRCA	Predicted proliferation supprssing lncRNAs
ENSG00000233621	-0.962459	2.7195e-28	BRCA	Predicted proliferation supprssing lncRNAs
ENSG00000233818	-0.352622	0.00714296	BRCA	Predicted proliferation supprssing lncRNAs
ENSG00000233895	-1.13605	1.62371e-18	BRCA	Predicted proliferation supprssing lncRNAs
ENSG00000234546	-0.754832	2.43834e-12	BRCA	Predicted proliferation supprssing lncRNAs
ENSG00000234807	-1.09416	1.05243e-15	BRCA	Predicted proliferation supprssing lncRNAs
ENSG00000234869	-0.803835	2.95463e-08	BRCA	Predicted proliferation supprssing lncRNAs
ENSG00000234899	1.25962	5.23713e-09	BRCA	Predicted proliferation supprssing lncRNAs
ENSG00000235027	-0.382241	0.0215431	BRCA	Predicted proliferation supprssing lncRNAs
ENSG00000235609	-0.786326	1.17431e-12	BRCA	Predicted proliferation supprssing lncRNAs
ENSG00000235790	-0.606245	4.11849e-07	BRCA	Predicted proliferation supprssing lncRNAs
ENSG00000235947	-2.12488	1.09745e-24	BRCA	Predicted proliferation supprssing lncRNAs
ENSG00000236039	-1.23963	2.63464e-08	BRCA	Predicted proliferation supprssing lncRNAs
ENSG00000236204	-0.343714	9.31832e-05	BRCA	Predicted proliferation supprssing lncRNAs
ENSG00000236318	-0.579814	0.0445685	BRCA	Predicted proliferation supprssing lncRNAs
ENSG00000236830	-0.666969	2.78609e-10	BRCA	Predicted proliferation supprssing lncRNAs
ENSG00000237807	-0.509796	0.00887151	BRCA	Predicted proliferation supprssing lncRNAs
ENSG00000240006	0.454752	0.0382848	BRCA	Predicted proliferation supprssing lncRNAs
ENSG00000240032	0.737456	9.98492e-06	BRCA	Predicted proliferation supprssing lncRNAs
ENSG00000240875	-1.40715	3.27526e-21	BRCA	Predicted proliferation supprssing lncRNAs
ENSG00000241288	-0.50691	1.39484e-05	BRCA	Predicted proliferation supprssing lncRNAs
ENSG00000242861	-0.524872	4.35985e-08	BRCA	Predicted proliferation supprssing lncRNAs
ENSG00000244041	-0.302293	3.80283e-05	BRCA	Predicted proliferation supprssing lncRNAs
ENSG00000244198	-0.274291	0.00170461	BRCA	Predicted proliferation supprssing lncRNAs
ENSG00000244479	-0.556897	6.82056e-09	BRCA	Predicted proliferation supprssing lncRNAs
ENSG00000244541	0.458694	0.0256823	BRCA	Predicted proliferation supprssing lncRNAs
ENSG00000245532	-1.18757	1.1439e-20	BRCA	Predicted proliferation supprssing lncRNAs
ENSG00000245573	-0.921091	2.46527e-19	BRCA	Predicted proliferation supprssing lncRNAs
ENSG00000246640	-1.20129	4.87707e-26	BRCA	Predicted proliferation supprssing lncRNAs
ENSG00000247317	0.620341	2.23672e-05	BRCA	Predicted proliferation supprssing lncRNAs
ENSG00000248429	-2.56456	3.01858e-40	BRCA	Predicted proliferation supprssing lncRNAs
ENSG00000248787	-0.610328	2.53039e-06	BRCA	Predicted proliferation supprssing lncRNAs
ENSG00000249348	-0.834194	1.82417e-25	BRCA	Predicted proliferation supprssing lncRNAs
ENSG00000250602	-0.492516	2.1393e-05	BRCA	Predicted proliferation supprssing lncRNAs
ENSG00000250608	-1.53983	1.41284e-28	BRCA	Predicted proliferation supprssing lncRNAs
ENSG00000250786	-1.0599	6.37435e-11	BRCA	Predicted proliferation supprssing lncRNAs
ENSG00000251396	0.588821	8.74808e-08	BRCA	Predicted proliferation supprssing lncRNAs
ENSG00000251432	-0.746671	2.65622e-12	BRCA	Predicted proliferation supprssing lncRNAs
ENSG00000251562	-0.463604	9.91327e-06	BRCA	Predicted proliferation supprssing lncRNAs
ENSG00000251603	0.416929	9.11984e-06	BRCA	Predicted proliferation supprssing lncRNAs
ENSG00000253552	-0.511343	0.00049217	BRCA	Predicted proliferation supprssing lncRNAs
ENSG00000253671	-1.2399	1.88484e-14	BRCA	Predicted proliferation supprssing lncRNAs
ENSG00000253944	-0.781555	1.75738e-06	BRCA	Predicted proliferation supprssing lncRNAs
ENSG00000254109	-0.689852	5.43189e-08	BRCA	Predicted proliferation supprssing lncRNAs
ENSG00000254286	0.223693	0.0328079	BRCA	Predicted proliferation supprssing lncRNAs
ENSG00000254333	-0.81592	1.13637e-05	BRCA	Predicted proliferation supprssing lncRNAs
ENSG00000254837	-0.301321	1.19949e-05	BRCA	Predicted proliferation supprssing lncRNAs
ENSG00000254847	-1.01932	2.98462e-12	BRCA	Predicted proliferation supprssing lncRNAs
ENSG00000255100	0.412095	0.018518	BRCA	Predicted proliferation supprssing lncRNAs
ENSG00000255471	-1.10847	3.18483e-19	BRCA	Predicted proliferation supprssing lncRNAs
ENSG00000257038	-1.40399	1.17201e-32	BRCA	Predicted proliferation supprssing lncRNAs
ENSG00000257086	0.391402	0.000105927	BRCA	Predicted proliferation supprssing lncRNAs
ENSG00000257298	-1.01915	3.18703e-20	BRCA	Predicted proliferation supprssing lncRNAs
ENSG00000257829	0.968724	3.63815e-06	BRCA	Predicted proliferation supprssing lncRNAs
ENSG00000258279	1.37332	1.0755e-20	BRCA	Predicted proliferation supprssing lncRNAs
ENSG00000258457	-0.755514	4.18685e-09	BRCA	Predicted proliferation supprssing lncRNAs
ENSG00000258789	-1.39939	1.42297e-20	BRCA	Predicted proliferation supprssing lncRNAs
ENSG00000258955	-0.354735	0.0155877	BRCA	Predicted proliferation supprssing lncRNAs
ENSG00000259146	-0.343301	0.00288546	BRCA	Predicted proliferation supprssing lncRNAs
ENSG00000259275	-1.12117	1.91935e-16	BRCA	Predicted proliferation supprssing lncRNAs
ENSG00000259345	-0.742387	1.66366e-05	BRCA	Predicted proliferation supprssing lncRNAs
ENSG00000259354	-1.30997	1.80893e-14	BRCA	Predicted proliferation supprssing lncRNAs
ENSG00000259450	-1.06615	4.69857e-10	BRCA	Predicted proliferation supprssing lncRNAs
ENSG00000259604	0.957472	1.11446e-05	BRCA	Predicted proliferation supprssing lncRNAs
ENSG00000260032	-0.360923	1.34481e-10	BRCA	Predicted proliferation supprssing lncRNAs
ENSG00000260077	0.375784	7.48679e-06	BRCA	Predicted proliferation supprssing lncRNAs
ENSG00000260160	-0.492276	3.02916e-10	BRCA	Predicted proliferation supprssing lncRNAs
ENSG00000260641	-0.639901	0.000379982	BRCA	Predicted proliferation supprssing lncRNAs
ENSG00000260911	-1.04927	1.6551e-12	BRCA	Predicted proliferation supprssing lncRNAs
ENSG00000260941	-0.439915	0.000455888	BRCA	Predicted proliferation supprssing lncRNAs
ENSG00000260971	0.429816	0.000281244	BRCA	Predicted proliferation supprssing lncRNAs
ENSG00000260989	-1.1274	4.73658e-08	BRCA	Predicted proliferation supprssing lncRNAs
ENSG00000261051	0.716858	1.01827e-07	BRCA	Predicted proliferation supprssing lncRNAs
ENSG00000261068	-0.291769	0.0225516	BRCA	Predicted proliferation supprssing lncRNAs
ENSG00000261888	-1.21256	1.36046e-19	BRCA	Predicted proliferation supprssing lncRNAs
ENSG00000262903	0.698719	1.83332e-05	BRCA	Predicted proliferation supprssing lncRNAs
ENSG00000263680	1.80453	2.71401e-23	BRCA	Predicted proliferation supprssing lncRNAs
ENSG00000265413	-1.0368	5.67159e-17	BRCA	Predicted proliferation supprssing lncRNAs
ENSG00000265519	-1.27719	3.33884e-36	BRCA	Predicted proliferation supprssing lncRNAs
ENSG00000266010	1.00324	1.53988e-10	BRCA	Predicted proliferation supprssing lncRNAs
ENSG00000266903	-0.474269	0.00493084	BRCA	Predicted proliferation supprssing lncRNAs
ENSG00000266970	0.405922	0.0081877	BRCA	Predicted proliferation supprssing lncRNAs
ENSG00000267082	-0.5857	9.05979e-09	BRCA	Predicted proliferation supprssing lncRNAs
ENSG00000267288	-0.845342	9.70576e-09	BRCA	Predicted proliferation supprssing lncRNAs
ENSG00000268621	0.569891	0.00162515	BRCA	Predicted proliferation supprssing lncRNAs
ENSG00000269895	-1.01547	3.43176e-15	BRCA	Predicted proliferation supprssing lncRNAs
ENSG00000270001	-0.666111	6.12354e-06	BRCA	Predicted proliferation supprssing lncRNAs
ENSG00000270210	-0.298568	0.0115861	BRCA	Predicted proliferation supprssing lncRNAs
ENSG00000271259	-1.17948	7.71245e-17	BRCA	Predicted proliferation supprssing lncRNAs
ENSG00000271324	-0.744112	4.6183e-17	BRCA	Predicted proliferation supprssing lncRNAs
ENSG00000271327	-0.872107	1.99476e-12	BRCA	Predicted proliferation supprssing lncRNAs
ENSG00000271344	-0.2902	0.0203172	BRCA	Predicted proliferation supprssing lncRNAs
ENSG00000272081	0.192121	0.00911578	BRCA	Predicted proliferation supprssing lncRNAs
ENSG00000272088	0.485647	0.00548964	BRCA	Predicted proliferation supprssing lncRNAs
ENSG00000272341	-0.899637	1.48689e-15	BRCA	Predicted proliferation supprssing lncRNAs
ENSG00000272512	1.05868	1.1004e-10	BRCA	Predicted proliferation supprssing lncRNAs
ENSG00000272668	-1.06877	5.98799e-12	BRCA	Predicted proliferation supprssing lncRNAs
ENSG00000272695	-0.675277	1.37606e-07	BRCA	Predicted proliferation supprssing lncRNAs
ENSG00000272824	-1.27285	6.3984e-11	BRCA	Predicted proliferation supprssing lncRNAs
ENSG00000272913	-0.556596	6.81264e-12	BRCA	Predicted proliferation supprssing lncRNAs
ENSG00000272950	-0.43201	0.000979598	BRCA	Predicted proliferation supprssing lncRNAs
ENSG00000273033	-0.613007	7.92182e-18	BRCA	Predicted proliferation supprssing lncRNAs
ENSG00000163597	0.734337	4.7393e-27	BRCA	Predicted proliferation inducing lncRNAs
ENSG00000178440	-0.246332	0.0140343	BRCA	Predicted proliferation inducing lncRNAs
ENSG00000196756	0.868006	1.40553e-25	BRCA	Predicted proliferation inducing lncRNAs
ENSG00000203362	1.04191	3.65222e-33	BRCA	Predicted proliferation inducing lncRNAs
ENSG00000215417	0.816643	1.34485e-11	BRCA	Predicted proliferation inducing lncRNAs
ENSG00000224635	0.902518	9.44631e-12	BRCA	Predicted proliferation inducing lncRNAs
ENSG00000224738	0.705937	9.0932e-12	BRCA	Predicted proliferation inducing lncRNAs
ENSG00000225163	0.547679	0.000479153	BRCA	Predicted proliferation inducing lncRNAs
ENSG00000225675	1.3099	1.34291e-16	BRCA	Predicted proliferation inducing lncRNAs
ENSG00000226688	0.222058	0.00135855	BRCA	Predicted proliferation inducing lncRNAs
ENSG00000226950	0.549074	8.24334e-10	BRCA	Predicted proliferation inducing lncRNAs
ENSG00000227963	0.399935	5.55628e-08	BRCA	Predicted proliferation inducing lncRNAs
ENSG00000228302	0.212493	0.0339111	BRCA	Predicted proliferation inducing lncRNAs
ENSG00000230747	-0.287325	0.0367949	BRCA	Predicted proliferation inducing lncRNAs
ENSG00000231607	0.584754	1.60041e-10	BRCA	Predicted proliferation inducing lncRNAs
ENSG00000232956	0.753377	6.60846e-27	BRCA	Predicted proliferation inducing lncRNAs
ENSG00000234129	1.0173	2.36302e-29	BRCA	Predicted proliferation inducing lncRNAs
ENSG00000234160	0.465866	4.09216e-06	BRCA	Predicted proliferation inducing lncRNAs
ENSG00000234171	0.574768	3.4055e-13	BRCA	Predicted proliferation inducing lncRNAs
ENSG00000234327	0.703911	7.63275e-10	BRCA	Predicted proliferation inducing lncRNAs
ENSG00000234753	2.02537	2.13675e-34	BRCA	Predicted proliferation inducing lncRNAs
ENSG00000236991	-0.787919	1.10548e-09	BRCA	Predicted proliferation inducing lncRNAs
ENSG00000237976	0.645626	9.72724e-08	BRCA	Predicted proliferation inducing lncRNAs
ENSG00000242125	0.516136	0.000122108	BRCA	Predicted proliferation inducing lncRNAs
ENSG00000244332	1.42336	2.8715e-21	BRCA	Predicted proliferation inducing lncRNAs
ENSG00000245248	1.34443	1.28322e-27	BRCA	Predicted proliferation inducing lncRNAs
ENSG00000247092	0.390405	6.70569e-06	BRCA	Predicted proliferation inducing lncRNAs
ENSG00000247240	-0.123885	0.044159	BRCA	Predicted proliferation inducing lncRNAs
ENSG00000249655	0.452727	0.00066925	BRCA	Predicted proliferation inducing lncRNAs
ENSG00000250988	0.397539	3.39021e-07	BRCA	Predicted proliferation inducing lncRNAs
ENSG00000251221	0.676418	1.3252e-06	BRCA	Predicted proliferation inducing lncRNAs
ENSG00000254694	-0.525981	0.000322573	BRCA	Predicted proliferation inducing lncRNAs
ENSG00000255121	0.235859	0.0156346	BRCA	Predicted proliferation inducing lncRNAs
ENSG00000255717	1.09363	6.02156e-36	BRCA	Predicted proliferation inducing lncRNAs
ENSG00000257167	1.49645	9.70375e-42	BRCA	Predicted proliferation inducing lncRNAs
ENSG00000257285	-0.507694	9.75921e-05	BRCA	Predicted proliferation inducing lncRNAs
ENSG00000257497	0.818313	9.52451e-10	BRCA	Predicted proliferation inducing lncRNAs
ENSG00000258857	0.442016	0.013385	BRCA	Predicted proliferation inducing lncRNAs
ENSG00000259093	0.581473	2.18052e-12	BRCA	Predicted proliferation inducing lncRNAs
ENSG00000260213	0.373033	0.000169467	BRCA	Predicted proliferation inducing lncRNAs
ENSG00000260773	-0.450498	0.000137073	BRCA	Predicted proliferation inducing lncRNAs
ENSG00000261373	1.22489	4.86878e-10	BRCA	Predicted proliferation inducing lncRNAs
ENSG00000262222	0.454032	0.00201079	BRCA	Predicted proliferation inducing lncRNAs
ENSG00000262703	1.31376	2.87763e-25	BRCA	Predicted proliferation inducing lncRNAs
ENSG00000263013	0.376463	0.000265001	BRCA	Predicted proliferation inducing lncRNAs
ENSG00000263731	0.898633	1.29845e-21	BRCA	Predicted proliferation inducing lncRNAs
ENSG00000264577	0.26628	0.00622159	BRCA	Predicted proliferation inducing lncRNAs
ENSG00000266402	1.02395	4.02366e-16	BRCA	Predicted proliferation inducing lncRNAs
ENSG00000266969	0.898017	7.13251e-10	BRCA	Predicted proliferation inducing lncRNAs
ENSG00000267150	0.508719	1.84301e-05	BRCA	Predicted proliferation inducing lncRNAs
ENSG00000269534	0.736158	1.3786e-06	BRCA	Predicted proliferation inducing lncRNAs
ENSG00000269688	0.315871	0.0158543	BRCA	Predicted proliferation inducing lncRNAs
ENSG00000269947	-0.269588	0.00430871	BRCA	Predicted proliferation inducing lncRNAs
ENSG00000269951	0.450572	0.000358027	BRCA	Predicted proliferation inducing lncRNAs
ENSG00000269974	1.78509	1.99513e-35	BRCA	Predicted proliferation inducing lncRNAs
ENSG00000270083	0.406733	3.42888e-05	BRCA	Predicted proliferation inducing lncRNAs
ENSG00000272716	0.891606	1.77558e-13	BRCA	Predicted proliferation inducing lncRNAs
ENSG00000273162	1.03412	3.55879e-19	BRCA	Predicted proliferation inducing lncRNAs
ENSG00000146666	0.964101	0.000174436	HNSC	Predicted proliferation supprssing lncRNAs
ENSG00000185168	-0.93395	2.20839e-05	HNSC	Predicted proliferation supprssing lncRNAs
ENSG00000186056	0.655338	0.00187121	HNSC	Predicted proliferation supprssing lncRNAs
ENSG00000188660	0.36861	0.0353873	HNSC	Predicted proliferation supprssing lncRNAs
ENSG00000204054	0.415801	0.000719935	HNSC	Predicted proliferation supprssing lncRNAs
ENSG00000214922	0.740091	2.98414e-06	HNSC	Predicted proliferation supprssing lncRNAs
ENSG00000224409	-0.923602	0.000151108	HNSC	Predicted proliferation supprssing lncRNAs
ENSG00000224596	-0.366472	0.0344061	HNSC	Predicted proliferation supprssing lncRNAs
ENSG00000224818	-0.483536	4.84954e-05	HNSC	Predicted proliferation supprssing lncRNAs
ENSG00000225302	0.508116	0.0280198	HNSC	Predicted proliferation supprssing lncRNAs
ENSG00000225511	-0.437713	0.0183012	HNSC	Predicted proliferation supprssing lncRNAs
ENSG00000225764	1.62035	2.24824e-08	HNSC	Predicted proliferation supprssing lncRNAs
ENSG00000227210	0.772451	0.000122641	HNSC	Predicted proliferation supprssing lncRNAs
ENSG00000228288	-0.703768	7.71167e-05	HNSC	Predicted proliferation supprssing lncRNAs
ENSG00000228526	0.903442	1.15566e-05	HNSC	Predicted proliferation supprssing lncRNAs
ENSG00000228917	0.49853	0.0140225	HNSC	Predicted proliferation supprssing lncRNAs
ENSG00000230939	0.483178	0.0473342	HNSC	Predicted proliferation supprssing lncRNAs
ENSG00000231160	0.505163	0.0254461	HNSC	Predicted proliferation supprssing lncRNAs
ENSG00000231324	0.682292	0.00805597	HNSC	Predicted proliferation supprssing lncRNAs
ENSG00000231742	0.538151	0.0307071	HNSC	Predicted proliferation supprssing lncRNAs
ENSG00000232453	-1.34449	3.90594e-13	HNSC	Predicted proliferation supprssing lncRNAs
ENSG00000232536	0.537077	0.0104636	HNSC	Predicted proliferation supprssing lncRNAs
ENSG00000232679	-1.62343	1.25205e-09	HNSC	Predicted proliferation supprssing lncRNAs
ENSG00000233006	0.413332	0.001813	HNSC	Predicted proliferation supprssing lncRNAs
ENSG00000233621	-0.728131	7.76482e-08	HNSC	Predicted proliferation supprssing lncRNAs
ENSG00000234546	0.713828	0.000200242	HNSC	Predicted proliferation supprssing lncRNAs
ENSG00000234869	0.527491	0.0074662	HNSC	Predicted proliferation supprssing lncRNAs
ENSG00000235385	-0.874769	0.00966589	HNSC	Predicted proliferation supprssing lncRNAs
ENSG00000235609	-0.433775	0.00376916	HNSC	Predicted proliferation supprssing lncRNAs
ENSG00000235947	0.671019	0.00189036	HNSC	Predicted proliferation supprssing lncRNAs
ENSG00000236204	0.584456	0.000554732	HNSC	Predicted proliferation supprssing lncRNAs
ENSG00000238279	0.545015	0.0188989	HNSC	Predicted proliferation supprssing lncRNAs
ENSG00000240006	1.14567	0.000158077	HNSC	Predicted proliferation supprssing lncRNAs
ENSG00000240032	0.724994	0.00347177	HNSC	Predicted proliferation supprssing lncRNAs
ENSG00000242861	0.375666	0.0228981	HNSC	Predicted proliferation supprssing lncRNAs
ENSG00000244479	0.347392	0.0361423	HNSC	Predicted proliferation supprssing lncRNAs
ENSG00000244541	-1.14946	2.34308e-05	HNSC	Predicted proliferation supprssing lncRNAs
ENSG00000245573	0.454138	0.0200522	HNSC	Predicted proliferation supprssing lncRNAs
ENSG00000246640	0.440904	0.00999576	HNSC	Predicted proliferation supprssing lncRNAs
ENSG00000247317	0.960964	2.47596e-07	HNSC	Predicted proliferation supprssing lncRNAs
ENSG00000249348	0.296436	0.020353	HNSC	Predicted proliferation supprssing lncRNAs
ENSG00000250509	1.31277	3.91064e-05	HNSC	Predicted proliferation supprssing lncRNAs
ENSG00000251179	-0.487333	0.0173716	HNSC	Predicted proliferation supprssing lncRNAs
ENSG00000253671	1.05414	4.14023e-06	HNSC	Predicted proliferation supprssing lncRNAs
ENSG00000253944	0.884402	1.11875e-05	HNSC	Predicted proliferation supprssing lncRNAs
ENSG00000255306	0.718634	7.05596e-05	HNSC	Predicted proliferation supprssing lncRNAs
ENSG00000255471	-0.379154	0.0355067	HNSC	Predicted proliferation supprssing lncRNAs
ENSG00000257038	-0.490143	0.0158511	HNSC	Predicted proliferation supprssing lncRNAs
ENSG00000257086	-0.553066	0.00046657	HNSC	Predicted proliferation supprssing lncRNAs
ENSG00000257298	0.334458	0.0400089	HNSC	Predicted proliferation supprssing lncRNAs
ENSG00000257829	1.18133	6.40242e-05	HNSC	Predicted proliferation supprssing lncRNAs
ENSG00000258279	-0.611896	0.00731258	HNSC	Predicted proliferation supprssing lncRNAs
ENSG00000258457	0.427307	0.00475506	HNSC	Predicted proliferation supprssing lncRNAs
ENSG00000258711	-0.763109	0.000103887	HNSC	Predicted proliferation supprssing lncRNAs
ENSG00000259005	0.59415	0.00434888	HNSC	Predicted proliferation supprssing lncRNAs
ENSG00000259345	0.847526	3.61396e-07	HNSC	Predicted proliferation supprssing lncRNAs
ENSG00000259450	0.486233	0.00608592	HNSC	Predicted proliferation supprssing lncRNAs
ENSG00000259604	0.639398	0.0164512	HNSC	Predicted proliferation supprssing lncRNAs
ENSG00000260077	0.727229	3.38589e-05	HNSC	Predicted proliferation supprssing lncRNAs
ENSG00000260633	0.619755	0.000291596	HNSC	Predicted proliferation supprssing lncRNAs
ENSG00000261051	0.811223	2.35004e-05	HNSC	Predicted proliferation supprssing lncRNAs
ENSG00000261068	-0.67561	0.00285572	HNSC	Predicted proliferation supprssing lncRNAs
ENSG00000261105	1.05679	0.000107912	HNSC	Predicted proliferation supprssing lncRNAs
ENSG00000261888	-1.02834	3.0464e-07	HNSC	Predicted proliferation supprssing lncRNAs
ENSG00000263680	0.760066	4.14023e-06	HNSC	Predicted proliferation supprssing lncRNAs
ENSG00000266903	0.784174	0.000263012	HNSC	Predicted proliferation supprssing lncRNAs
ENSG00000266970	0.520694	0.00651518	HNSC	Predicted proliferation supprssing lncRNAs
ENSG00000267082	0.462039	0.00844588	HNSC	Predicted proliferation supprssing lncRNAs
ENSG00000267288	0.56608	0.000440187	HNSC	Predicted proliferation supprssing lncRNAs
ENSG00000267922	-0.864391	0.00255801	HNSC	Predicted proliferation supprssing lncRNAs
ENSG00000268460	-0.74307	0.00320237	HNSC	Predicted proliferation supprssing lncRNAs
ENSG00000268621	-1.60999	7.79674e-06	HNSC	Predicted proliferation supprssing lncRNAs
ENSG00000270210	-0.7571	2.5816e-05	HNSC	Predicted proliferation supprssing lncRNAs
ENSG00000270557	0.552179	0.0106936	HNSC	Predicted proliferation supprssing lncRNAs
ENSG00000271324	-0.435499	0.00254654	HNSC	Predicted proliferation supprssing lncRNAs
ENSG00000271327	0.455066	0.0153756	HNSC	Predicted proliferation supprssing lncRNAs
ENSG00000272088	1.04677	4.70317e-05	HNSC	Predicted proliferation supprssing lncRNAs
ENSG00000272512	0.62043	0.00805597	HNSC	Predicted proliferation supprssing lncRNAs
ENSG00000272824	-0.754802	0.000834835	HNSC	Predicted proliferation supprssing lncRNAs
ENSG00000272913	0.761756	0.000238422	HNSC	Predicted proliferation supprssing lncRNAs
ENSG00000272953	0.512653	0.0216047	HNSC	Predicted proliferation supprssing lncRNAs
ENSG00000273305	0.715788	0.00187121	HNSC	Predicted proliferation supprssing lncRNAs
ENSG00000273443	0.552833	0.0143923	HNSC	Predicted proliferation supprssing lncRNAs
ENSG00000163597	0.526043	2.007e-12	HNSC	Predicted proliferation inducing lncRNAs
ENSG00000178440	0.863009	1.81024e-06	HNSC	Predicted proliferation inducing lncRNAs
ENSG00000196756	0.749666	1.0113e-07	HNSC	Predicted proliferation inducing lncRNAs
ENSG00000203362	0.929328	7.24347e-15	HNSC	Predicted proliferation inducing lncRNAs
ENSG00000203875	0.39884	0.0224913	HNSC	Predicted proliferation inducing lncRNAs
ENSG00000215417	0.815948	3.98309e-05	HNSC	Predicted proliferation inducing lncRNAs
ENSG00000224635	0.676814	0.000643179	HNSC	Predicted proliferation inducing lncRNAs
ENSG00000224738	1.08574	1.96754e-12	HNSC	Predicted proliferation inducing lncRNAs
ENSG00000225163	1.34417	3.04866e-09	HNSC	Predicted proliferation inducing lncRNAs
ENSG00000225675	0.895915	1.06608e-05	HNSC	Predicted proliferation inducing lncRNAs
ENSG00000226688	0.763893	3.70062e-17	HNSC	Predicted proliferation inducing lncRNAs
ENSG00000226950	0.877351	2.02424e-07	HNSC	Predicted proliferation inducing lncRNAs
ENSG00000227598	1.42601	3.78726e-14	HNSC	Predicted proliferation inducing lncRNAs
ENSG00000228302	0.705367	4.12631e-05	HNSC	Predicted proliferation inducing lncRNAs
ENSG00000231607	1.27441	8.72397e-22	HNSC	Predicted proliferation inducing lncRNAs
ENSG00000232956	0.368383	0.0109521	HNSC	Predicted proliferation inducing lncRNAs
ENSG00000233016	0.613732	7.70362e-06	HNSC	Predicted proliferation inducing lncRNAs
ENSG00000233844	1.60869	1.68473e-10	HNSC	Predicted proliferation inducing lncRNAs
ENSG00000234129	1.29874	4.21409e-23	HNSC	Predicted proliferation inducing lncRNAs
ENSG00000234160	0.768722	9.49394e-09	HNSC	Predicted proliferation inducing lncRNAs
ENSG00000234171	0.580091	9.95424e-05	HNSC	Predicted proliferation inducing lncRNAs
ENSG00000234264	1.34445	1.49541e-14	HNSC	Predicted proliferation inducing lncRNAs
ENSG00000234327	0.419321	0.0199438	HNSC	Predicted proliferation inducing lncRNAs
ENSG00000234753	1.60628	6.5876e-11	HNSC	Predicted proliferation inducing lncRNAs
ENSG00000236200	1.22186	2.72421e-13	HNSC	Predicted proliferation inducing lncRNAs
ENSG00000237718	0.660574	0.000171095	HNSC	Predicted proliferation inducing lncRNAs
ENSG00000237976	0.44198	0.022259	HNSC	Predicted proliferation inducing lncRNAs
ENSG00000242125	0.650209	0.00240775	HNSC	Predicted proliferation inducing lncRNAs
ENSG00000247092	0.47556	0.00139781	HNSC	Predicted proliferation inducing lncRNAs
ENSG00000247240	0.904829	9.37506e-21	HNSC	Predicted proliferation inducing lncRNAs
ENSG00000249637	0.621723	2.17922e-06	HNSC	Predicted proliferation inducing lncRNAs
ENSG00000250988	0.696624	5.10367e-07	HNSC	Predicted proliferation inducing lncRNAs
ENSG00000254694	0.693953	0.000793302	HNSC	Predicted proliferation inducing lncRNAs
ENSG00000255121	1.00983	7.17743e-10	HNSC	Predicted proliferation inducing lncRNAs
ENSG00000255717	1.26016	1.2276e-17	HNSC	Predicted proliferation inducing lncRNAs
ENSG00000255857	0.926726	9.1905e-14	HNSC	Predicted proliferation inducing lncRNAs
ENSG00000257167	1.83622	1.41536e-26	HNSC	Predicted proliferation inducing lncRNAs
ENSG00000257497	0.630805	0.000327345	HNSC	Predicted proliferation inducing lncRNAs
ENSG00000258017	1.00649	2.42529e-06	HNSC	Predicted proliferation inducing lncRNAs
ENSG00000258857	1.02108	1.359e-05	HNSC	Predicted proliferation inducing lncRNAs
ENSG00000259093	0.867243	4.21409e-23	HNSC	Predicted proliferation inducing lncRNAs
ENSG00000259469	0.771829	1.22458e-05	HNSC	Predicted proliferation inducing lncRNAs
ENSG00000260773	1.12161	2.26845e-07	HNSC	Predicted proliferation inducing lncRNAs
ENSG00000261373	0.806734	0.000342979	HNSC	Predicted proliferation inducing lncRNAs
ENSG00000261428	0.501404	0.00037198	HNSC	Predicted proliferation inducing lncRNAs
ENSG00000262222	0.743387	0.00148358	HNSC	Predicted proliferation inducing lncRNAs
ENSG00000262703	1.86984	1.34798e-20	HNSC	Predicted proliferation inducing lncRNAs
ENSG00000263013	0.387216	0.0110702	HNSC	Predicted proliferation inducing lncRNAs
ENSG00000263731	0.732407	3.15018e-08	HNSC	Predicted proliferation inducing lncRNAs
ENSG00000264577	1.00863	1.1056e-08	HNSC	Predicted proliferation inducing lncRNAs
ENSG00000266402	0.616285	0.00193198	HNSC	Predicted proliferation inducing lncRNAs
ENSG00000266801	0.52239	0.00296774	HNSC	Predicted proliferation inducing lncRNAs
ENSG00000266969	1.03739	1.34982e-07	HNSC	Predicted proliferation inducing lncRNAs
ENSG00000269534	0.921468	1.06214e-05	HNSC	Predicted proliferation inducing lncRNAs
ENSG00000269688	0.910683	3.3487e-05	HNSC	Predicted proliferation inducing lncRNAs
ENSG00000269947	0.71032	6.14081e-05	HNSC	Predicted proliferation inducing lncRNAs
ENSG00000269951	0.968881	6.46516e-08	HNSC	Predicted proliferation inducing lncRNAs
ENSG00000269974	1.6262	8.61139e-14	HNSC	Predicted proliferation inducing lncRNAs
ENSG00000270083	1.01837	9.25359e-07	HNSC	Predicted proliferation inducing lncRNAs
ENSG00000270141	0.598182	0.0117	HNSC	Predicted proliferation inducing lncRNAs
ENSG00000272716	0.574	0.00125753	HNSC	Predicted proliferation inducing lncRNAs
ENSG00000273162	1.20473	3.33919e-13	HNSC	Predicted proliferation inducing lncRNAs
ENSG00000273449	0.818068	1.93509e-05	HNSC	Predicted proliferation inducing lncRNAs
ENSG00000146666	1.39335	4.32702e-10	KIRC	Predicted proliferation supprssing lncRNAs
ENSG00000185186	1.10488	4.25595e-06	KIRC	Predicted proliferation supprssing lncRNAs
ENSG00000186056	0.444177	0.00907436	KIRC	Predicted proliferation supprssing lncRNAs
ENSG00000204054	-0.23443	0.0338075	KIRC	Predicted proliferation supprssing lncRNAs
ENSG00000204362	1.18959	0.00146622	KIRC	Predicted proliferation supprssing lncRNAs
ENSG00000223685	-0.430545	0.0278597	KIRC	Predicted proliferation supprssing lncRNAs
ENSG00000223829	1.58762	5.8549e-07	KIRC	Predicted proliferation supprssing lncRNAs
ENSG00000223975	1.31539	1.44403e-05	KIRC	Predicted proliferation supprssing lncRNAs
ENSG00000224596	0.789492	2.10586e-05	KIRC	Predicted proliferation supprssing lncRNAs
ENSG00000224818	0.481458	0.00701959	KIRC	Predicted proliferation supprssing lncRNAs
ENSG00000224897	0.4673	0.00256698	KIRC	Predicted proliferation supprssing lncRNAs
ENSG00000225506	0.518902	0.00868422	KIRC	Predicted proliferation supprssing lncRNAs
ENSG00000225511	1.20775	7.29339e-06	KIRC	Predicted proliferation supprssing lncRNAs
ENSG00000225764	0.543706	0.0396853	KIRC	Predicted proliferation supprssing lncRNAs
ENSG00000228288	0.497445	0.00955752	KIRC	Predicted proliferation supprssing lncRNAs
ENSG00000228791	-0.67842	4.21578e-05	KIRC	Predicted proliferation supprssing lncRNAs
ENSG00000229512	0.510687	0.020223	KIRC	Predicted proliferation supprssing lncRNAs
ENSG00000229647	1.31189	1.7362e-11	KIRC	Predicted proliferation supprssing lncRNAs
ENSG00000230479	1.16724	4.79625e-08	KIRC	Predicted proliferation supprssing lncRNAs
ENSG00000230943	1.46915	5.23985e-10	KIRC	Predicted proliferation supprssing lncRNAs
ENSG00000231187	0.500041	0.00806169	KIRC	Predicted proliferation supprssing lncRNAs
ENSG00000232679	2.48898	3.14714e-12	KIRC	Predicted proliferation supprssing lncRNAs
ENSG00000233077	1.2287	4.19836e-13	KIRC	Predicted proliferation supprssing lncRNAs
ENSG00000233237	-0.76738	8.15744e-06	KIRC	Predicted proliferation supprssing lncRNAs
ENSG00000233818	1.17874	4.70957e-08	KIRC	Predicted proliferation supprssing lncRNAs
ENSG00000233901	0.707152	0.000935556	KIRC	Predicted proliferation supprssing lncRNAs
ENSG00000234807	-0.486869	0.0121571	KIRC	Predicted proliferation supprssing lncRNAs
ENSG00000234869	0.65386	0.000395759	KIRC	Predicted proliferation supprssing lncRNAs
ENSG00000234899	-0.501617	0.0114985	KIRC	Predicted proliferation supprssing lncRNAs
ENSG00000235027	0.547155	0.0238828	KIRC	Predicted proliferation supprssing lncRNAs
ENSG00000235385	1.49868	4.87209e-07	KIRC	Predicted proliferation supprssing lncRNAs
ENSG00000235609	0.244355	0.0304621	KIRC	Predicted proliferation supprssing lncRNAs
ENSG00000235770	0.996077	5.19143e-10	KIRC	Predicted proliferation supprssing lncRNAs
ENSG00000235790	0.809296	3.88455e-05	KIRC	Predicted proliferation supprssing lncRNAs
ENSG00000235947	-0.836019	0.00168619	KIRC	Predicted proliferation supprssing lncRNAs
ENSG00000236039	1.14096	4.50548e-05	KIRC	Predicted proliferation supprssing lncRNAs
ENSG00000236064	0.885775	0.015411	KIRC	Predicted proliferation supprssing lncRNAs
ENSG00000237807	1.23982	1.28259e-08	KIRC	Predicted proliferation supprssing lncRNAs
ENSG00000238279	0.666772	0.00736953	KIRC	Predicted proliferation supprssing lncRNAs
ENSG00000240032	1.15421	9.15597e-07	KIRC	Predicted proliferation supprssing lncRNAs
ENSG00000240875	-0.861364	3.00443e-08	KIRC	Predicted proliferation supprssing lncRNAs
ENSG00000245573	-0.512367	1.02186e-06	KIRC	Predicted proliferation supprssing lncRNAs
ENSG00000246640	0.680503	4.96439e-05	KIRC	Predicted proliferation supprssing lncRNAs
ENSG00000250303	-0.52424	0.00839464	KIRC	Predicted proliferation supprssing lncRNAs
ENSG00000250509	1.18063	0.00010938	KIRC	Predicted proliferation supprssing lncRNAs
ENSG00000251179	1.71324	9.95868e-11	KIRC	Predicted proliferation supprssing lncRNAs
ENSG00000251396	0.5456	9.54778e-05	KIRC	Predicted proliferation supprssing lncRNAs
ENSG00000251603	-1.04534	4.52329e-16	KIRC	Predicted proliferation supprssing lncRNAs
ENSG00000253671	-0.573642	0.0225688	KIRC	Predicted proliferation supprssing lncRNAs
ENSG00000254109	-0.553898	0.0009058	KIRC	Predicted proliferation supprssing lncRNAs
ENSG00000254286	-0.457575	0.0087688	KIRC	Predicted proliferation supprssing lncRNAs
ENSG00000254837	-0.257284	0.0104784	KIRC	Predicted proliferation supprssing lncRNAs
ENSG00000255100	1.03597	2.65906e-05	KIRC	Predicted proliferation supprssing lncRNAs
ENSG00000255306	0.486416	0.0122225	KIRC	Predicted proliferation supprssing lncRNAs
ENSG00000255345	1.53738	4.91737e-11	KIRC	Predicted proliferation supprssing lncRNAs
ENSG00000255471	-0.391275	0.0248281	KIRC	Predicted proliferation supprssing lncRNAs
ENSG00000256894	0.523935	0.00801652	KIRC	Predicted proliferation supprssing lncRNAs
ENSG00000257038	-0.370913	0.0286501	KIRC	Predicted proliferation supprssing lncRNAs
ENSG00000257086	0.938838	1.0494e-06	KIRC	Predicted proliferation supprssing lncRNAs
ENSG00000257671	-0.773047	0.0216738	KIRC	Predicted proliferation supprssing lncRNAs
ENSG00000257859	0.524612	0.00713618	KIRC	Predicted proliferation supprssing lncRNAs
ENSG00000258410	0.77706	1.30743e-05	KIRC	Predicted proliferation supprssing lncRNAs
ENSG00000258789	-0.45782	0.0185215	KIRC	Predicted proliferation supprssing lncRNAs
ENSG00000258793	1.51364	5.30992e-06	KIRC	Predicted proliferation supprssing lncRNAs
ENSG00000258955	0.84816	0.000310547	KIRC	Predicted proliferation supprssing lncRNAs
ENSG00000259604	0.689985	0.00232964	KIRC	Predicted proliferation supprssing lncRNAs
ENSG00000260604	1.10068	3.66864e-06	KIRC	Predicted proliferation supprssing lncRNAs
ENSG00000261051	0.783962	0.000104752	KIRC	Predicted proliferation supprssing lncRNAs
ENSG00000262903	0.930909	0.00272948	KIRC	Predicted proliferation supprssing lncRNAs
ENSG00000263718	0.608044	0.000933095	KIRC	Predicted proliferation supprssing lncRNAs
ENSG00000266010	0.882311	2.31557e-05	KIRC	Predicted proliferation supprssing lncRNAs
ENSG00000266970	1.36985	5.36271e-11	KIRC	Predicted proliferation supprssing lncRNAs
ENSG00000268460	1.33672	7.56571e-10	KIRC	Predicted proliferation supprssing lncRNAs
ENSG00000268621	1.75611	3.32862e-09	KIRC	Predicted proliferation supprssing lncRNAs
ENSG00000268812	2.19384	1.83422e-09	KIRC	Predicted proliferation supprssing lncRNAs
ENSG00000270001	0.580369	0.000419426	KIRC	Predicted proliferation supprssing lncRNAs
ENSG00000270210	0.454536	0.0174064	KIRC	Predicted proliferation supprssing lncRNAs
ENSG00000271324	-0.466997	0.000922337	KIRC	Predicted proliferation supprssing lncRNAs
ENSG00000272081	0.421734	6.02389e-05	KIRC	Predicted proliferation supprssing lncRNAs
ENSG00000272482	-0.461496	0.014335	KIRC	Predicted proliferation supprssing lncRNAs
ENSG00000272695	-0.473119	0.0244393	KIRC	Predicted proliferation supprssing lncRNAs
ENSG00000272824	0.705331	0.00181856	KIRC	Predicted proliferation supprssing lncRNAs
ENSG00000272913	0.472668	0.00703312	KIRC	Predicted proliferation supprssing lncRNAs
ENSG00000273305	0.489975	0.0330386	KIRC	Predicted proliferation supprssing lncRNAs
ENSG00000273443	0.816809	0.000269298	KIRC	Predicted proliferation supprssing lncRNAs
ENSG00000163597	0.576403	2.03989e-07	KIRC	Predicted proliferation inducing lncRNAs
ENSG00000196756	0.604727	3.85308e-07	KIRC	Predicted proliferation inducing lncRNAs
ENSG00000203362	0.30106	0.0254195	KIRC	Predicted proliferation inducing lncRNAs
ENSG00000224635	0.587459	0.0051028	KIRC	Predicted proliferation inducing lncRNAs
ENSG00000225163	0.996353	2.68275e-06	KIRC	Predicted proliferation inducing lncRNAs
ENSG00000225675	0.930881	1.02224e-05	KIRC	Predicted proliferation inducing lncRNAs
ENSG00000227963	0.277891	0.0144191	KIRC	Predicted proliferation inducing lncRNAs
ENSG00000230747	0.551553	0.000812522	KIRC	Predicted proliferation inducing lncRNAs
ENSG00000231607	0.371988	0.00175472	KIRC	Predicted proliferation inducing lncRNAs
ENSG00000232956	0.796052	2.73658e-09	KIRC	Predicted proliferation inducing lncRNAs
ENSG00000234327	0.687663	3.54642e-06	KIRC	Predicted proliferation inducing lncRNAs
ENSG00000236200	0.455932	0.00836982	KIRC	Predicted proliferation inducing lncRNAs
ENSG00000237976	0.594164	0.000156247	KIRC	Predicted proliferation inducing lncRNAs
ENSG00000242125	1.08682	2.79501e-05	KIRC	Predicted proliferation inducing lncRNAs
ENSG00000245248	0.349011	0.0271344	KIRC	Predicted proliferation inducing lncRNAs
ENSG00000247240	0.200154	0.0152298	KIRC	Predicted proliferation inducing lncRNAs
ENSG00000249655	0.4647	0.0288234	KIRC	Predicted proliferation inducing lncRNAs
ENSG00000250988	0.304465	0.0347664	KIRC	Predicted proliferation inducing lncRNAs
ENSG00000254300	1.12801	0.00161865	KIRC	Predicted proliferation inducing lncRNAs
ENSG00000255717	0.510614	0.000304686	KIRC	Predicted proliferation inducing lncRNAs
ENSG00000257167	0.971855	5.57867e-12	KIRC	Predicted proliferation inducing lncRNAs
ENSG00000258857	-0.521715	0.0322938	KIRC	Predicted proliferation inducing lncRNAs
ENSG00000259093	0.594228	0.000124161	KIRC	Predicted proliferation inducing lncRNAs
ENSG00000261373	0.885043	0.000485649	KIRC	Predicted proliferation inducing lncRNAs
ENSG00000264577	0.934636	3.50018e-05	KIRC	Predicted proliferation inducing lncRNAs
ENSG00000266402	0.576965	0.00493807	KIRC	Predicted proliferation inducing lncRNAs
ENSG00000266469	0.668306	0.0274174	KIRC	Predicted proliferation inducing lncRNAs
ENSG00000269534	0.838075	0.000216	KIRC	Predicted proliferation inducing lncRNAs
ENSG00000269947	0.456594	0.00137115	KIRC	Predicted proliferation inducing lncRNAs
ENSG00000269974	1.31056	1.1044e-09	KIRC	Predicted proliferation inducing lncRNAs
ENSG00000272716	0.379705	0.0336724	KIRC	Predicted proliferation inducing lncRNAs
ENSG00000273162	1.00394	7.66106e-08	KIRC	Predicted proliferation inducing lncRNAs
ENSG00000273449	0.494742	0.028386	KIRC	Predicted proliferation inducing lncRNAs
ENSG00000175147	1.39354	8.54633e-06	LIHC	Predicted proliferation supprssing lncRNAs
ENSG00000186056	1.23614	1.98253e-09	LIHC	Predicted proliferation supprssing lncRNAs
ENSG00000198221	0.543919	0.0186929	LIHC	Predicted proliferation supprssing lncRNAs
ENSG00000214922	0.950039	0.000150585	LIHC	Predicted proliferation supprssing lncRNAs
ENSG00000215244	1.32168	9.68602e-07	LIHC	Predicted proliferation supprssing lncRNAs
ENSG00000224596	0.761695	0.0050091	LIHC	Predicted proliferation supprssing lncRNAs
ENSG00000225506	0.650071	0.0158751	LIHC	Predicted proliferation supprssing lncRNAs
ENSG00000227192	-1.02336	0.00555547	LIHC	Predicted proliferation supprssing lncRNAs
ENSG00000227210	0.804184	0.00848933	LIHC	Predicted proliferation supprssing lncRNAs
ENSG00000228812	-3.69666	2.11338e-11	LIHC	Predicted proliferation supprssing lncRNAs
ENSG00000229512	1.39231	3.34224e-05	LIHC	Predicted proliferation supprssing lncRNAs
ENSG00000230943	0.986389	0.00261646	LIHC	Predicted proliferation supprssing lncRNAs
ENSG00000231187	0.754153	0.0358046	LIHC	Predicted proliferation supprssing lncRNAs
ENSG00000231367	0.664966	0.0160274	LIHC	Predicted proliferation supprssing lncRNAs
ENSG00000231948	-1.68455	5.6254e-05	LIHC	Predicted proliferation supprssing lncRNAs
ENSG00000231969	-0.859805	0.0165002	LIHC	Predicted proliferation supprssing lncRNAs
ENSG00000233818	1.86442	1.98253e-09	LIHC	Predicted proliferation supprssing lncRNAs
ENSG00000234807	-0.705729	0.0248116	LIHC	Predicted proliferation supprssing lncRNAs
ENSG00000234869	0.861563	0.00210242	LIHC	Predicted proliferation supprssing lncRNAs
ENSG00000235027	0.713574	0.0197867	LIHC	Predicted proliferation supprssing lncRNAs
ENSG00000235609	-0.394293	0.0493908	LIHC	Predicted proliferation supprssing lncRNAs
ENSG00000235947	1.08729	0.0050091	LIHC	Predicted proliferation supprssing lncRNAs
ENSG00000236039	1.16407	0.00667644	LIHC	Predicted proliferation supprssing lncRNAs
ENSG00000236384	1.29629	3.00867e-05	LIHC	Predicted proliferation supprssing lncRNAs
ENSG00000236830	0.85574	2.92067e-07	LIHC	Predicted proliferation supprssing lncRNAs
ENSG00000237512	1.10878	0.00216387	LIHC	Predicted proliferation supprssing lncRNAs
ENSG00000237807	1.00053	0.00909175	LIHC	Predicted proliferation supprssing lncRNAs
ENSG00000240006	-1.05221	0.0355035	LIHC	Predicted proliferation supprssing lncRNAs
ENSG00000240032	1.31134	0.000248531	LIHC	Predicted proliferation supprssing lncRNAs
ENSG00000240875	-1.23151	0.000148343	LIHC	Predicted proliferation supprssing lncRNAs
ENSG00000241288	1.28623	8.96125e-09	LIHC	Predicted proliferation supprssing lncRNAs
ENSG00000242861	1.00128	3.94999e-07	LIHC	Predicted proliferation supprssing lncRNAs
ENSG00000244041	0.868037	1.26444e-06	LIHC	Predicted proliferation supprssing lncRNAs
ENSG00000244479	0.754648	0.0072069	LIHC	Predicted proliferation supprssing lncRNAs
ENSG00000245532	0.608158	0.00702003	LIHC	Predicted proliferation supprssing lncRNAs
ENSG00000245573	-0.784479	0.000232	LIHC	Predicted proliferation supprssing lncRNAs
ENSG00000248787	0.894387	0.000899035	LIHC	Predicted proliferation supprssing lncRNAs
ENSG00000250509	1.30479	0.010253	LIHC	Predicted proliferation supprssing lncRNAs
ENSG00000250786	0.947077	0.0221073	LIHC	Predicted proliferation supprssing lncRNAs
ENSG00000251432	0.716493	0.00178189	LIHC	Predicted proliferation supprssing lncRNAs
ENSG00000251562	0.8358	7.76858e-05	LIHC	Predicted proliferation supprssing lncRNAs
ENSG00000251603	1.19052	0.00041068	LIHC	Predicted proliferation supprssing lncRNAs
ENSG00000253227	2.51317	9.9211e-08	LIHC	Predicted proliferation supprssing lncRNAs
ENSG00000253671	1.03079	0.00559599	LIHC	Predicted proliferation supprssing lncRNAs
ENSG00000254286	0.742505	0.00137525	LIHC	Predicted proliferation supprssing lncRNAs
ENSG00000254333	-1.44326	0.00453203	LIHC	Predicted proliferation supprssing lncRNAs
ENSG00000254837	0.544851	0.000688561	LIHC	Predicted proliferation supprssing lncRNAs
ENSG00000255306	1.65055	5.10893e-11	LIHC	Predicted proliferation supprssing lncRNAs
ENSG00000255471	-1.61358	9.21319e-10	LIHC	Predicted proliferation supprssing lncRNAs
ENSG00000258457	0.482225	0.0104352	LIHC	Predicted proliferation supprssing lncRNAs
ENSG00000258793	2.74638	6.9112e-06	LIHC	Predicted proliferation supprssing lncRNAs
ENSG00000258955	1.28878	0.000191037	LIHC	Predicted proliferation supprssing lncRNAs
ENSG00000259005	0.808646	0.00420024	LIHC	Predicted proliferation supprssing lncRNAs
ENSG00000259345	1.4468	3.5099e-05	LIHC	Predicted proliferation supprssing lncRNAs
ENSG00000259450	0.763789	0.0112512	LIHC	Predicted proliferation supprssing lncRNAs
ENSG00000260032	0.279208	0.0458369	LIHC	Predicted proliferation supprssing lncRNAs
ENSG00000260077	0.504154	0.0102352	LIHC	Predicted proliferation supprssing lncRNAs
ENSG00000260118	0.853274	0.0014028	LIHC	Predicted proliferation supprssing lncRNAs
ENSG00000260160	1.00517	6.91483e-06	LIHC	Predicted proliferation supprssing lncRNAs
ENSG00000260604	1.69739	6.32889e-06	LIHC	Predicted proliferation supprssing lncRNAs
ENSG00000260911	0.728993	0.0142489	LIHC	Predicted proliferation supprssing lncRNAs
ENSG00000260941	1.12247	0.000260896	LIHC	Predicted proliferation supprssing lncRNAs
ENSG00000261051	1.30496	2.00189e-06	LIHC	Predicted proliferation supprssing lncRNAs
ENSG00000261068	1.10244	0.000330034	LIHC	Predicted proliferation supprssing lncRNAs
ENSG00000261105	1.1996	0.00799466	LIHC	Predicted proliferation supprssing lncRNAs
ENSG00000261888	0.716742	0.0207717	LIHC	Predicted proliferation supprssing lncRNAs
ENSG00000262903	0.964787	0.00747826	LIHC	Predicted proliferation supprssing lncRNAs
ENSG00000263680	3.09563	5.21093e-09	LIHC	Predicted proliferation supprssing lncRNAs
ENSG00000266903	0.550006	0.0421882	LIHC	Predicted proliferation supprssing lncRNAs
ENSG00000266970	1.43213	0.000475721	LIHC	Predicted proliferation supprssing lncRNAs
ENSG00000267288	1.89239	1.04617e-10	LIHC	Predicted proliferation supprssing lncRNAs
ENSG00000267519	0.988712	0.0011732	LIHC	Predicted proliferation supprssing lncRNAs
ENSG00000269976	-1.70168	2.07433e-05	LIHC	Predicted proliferation supprssing lncRNAs
ENSG00000270001	0.726838	0.00522526	LIHC	Predicted proliferation supprssing lncRNAs
ENSG00000270557	1.4793	4.33659e-07	LIHC	Predicted proliferation supprssing lncRNAs
ENSG00000271133	1.72728	0.000189722	LIHC	Predicted proliferation supprssing lncRNAs
ENSG00000271259	1.5299	6.05284e-07	LIHC	Predicted proliferation supprssing lncRNAs
ENSG00000271324	0.460288	0.0221413	LIHC	Predicted proliferation supprssing lncRNAs
ENSG00000271327	1.4579	2.94252e-08	LIHC	Predicted proliferation supprssing lncRNAs
ENSG00000272088	1.57995	7.40898e-05	LIHC	Predicted proliferation supprssing lncRNAs
ENSG00000272512	1.81813	1.0688e-06	LIHC	Predicted proliferation supprssing lncRNAs
ENSG00000272668	1.22516	0.000625192	LIHC	Predicted proliferation supprssing lncRNAs
ENSG00000272715	0.637665	0.0440769	LIHC	Predicted proliferation supprssing lncRNAs
ENSG00000272824	0.799655	0.0123226	LIHC	Predicted proliferation supprssing lncRNAs
ENSG00000272950	-1.09117	0.00113363	LIHC	Predicted proliferation supprssing lncRNAs
ENSG00000272953	0.859613	0.00068844	LIHC	Predicted proliferation supprssing lncRNAs
ENSG00000273033	0.698145	0.000148029	LIHC	Predicted proliferation supprssing lncRNAs
ENSG00000273443	2.00796	2.65565e-06	LIHC	Predicted proliferation supprssing lncRNAs
ENSG00000163597	0.613668	0.000427676	LIHC	Predicted proliferation inducing lncRNAs
ENSG00000178440	0.818677	0.00807155	LIHC	Predicted proliferation inducing lncRNAs
ENSG00000196756	0.958766	6.60082e-06	LIHC	Predicted proliferation inducing lncRNAs
ENSG00000203362	1.42228	8.30722e-11	LIHC	Predicted proliferation inducing lncRNAs
ENSG00000203875	0.581291	0.0333137	LIHC	Predicted proliferation inducing lncRNAs
ENSG00000215417	0.723562	0.0073716	LIHC	Predicted proliferation inducing lncRNAs
ENSG00000224738	1.59647	1.17296e-09	LIHC	Predicted proliferation inducing lncRNAs
ENSG00000226950	1.10455	0.00011158	LIHC	Predicted proliferation inducing lncRNAs
ENSG00000227598	1.31004	6.46665e-07	LIHC	Predicted proliferation inducing lncRNAs
ENSG00000227963	0.689334	0.00019319	LIHC	Predicted proliferation inducing lncRNAs
ENSG00000228302	1.34772	2.86422e-08	LIHC	Predicted proliferation inducing lncRNAs
ENSG00000230747	0.622288	0.0446806	LIHC	Predicted proliferation inducing lncRNAs
ENSG00000231607	1.57054	8.84727e-12	LIHC	Predicted proliferation inducing lncRNAs
ENSG00000232956	1.08976	2.98129e-05	LIHC	Predicted proliferation inducing lncRNAs
ENSG00000233016	1.34981	1.0878e-09	LIHC	Predicted proliferation inducing lncRNAs
ENSG00000234160	0.471887	0.0449264	LIHC	Predicted proliferation inducing lncRNAs
ENSG00000234171	0.50471	0.00590542	LIHC	Predicted proliferation inducing lncRNAs
ENSG00000234327	0.620162	0.0364986	LIHC	Predicted proliferation inducing lncRNAs
ENSG00000234753	0.973169	0.014767	LIHC	Predicted proliferation inducing lncRNAs
ENSG00000236200	1.34181	1.3717e-08	LIHC	Predicted proliferation inducing lncRNAs
ENSG00000237976	0.928495	0.00399846	LIHC	Predicted proliferation inducing lncRNAs
ENSG00000242125	2.06385	1.21755e-05	LIHC	Predicted proliferation inducing lncRNAs
ENSG00000247092	0.473487	0.0181429	LIHC	Predicted proliferation inducing lncRNAs
ENSG00000247240	0.478675	0.000654015	LIHC	Predicted proliferation inducing lncRNAs
ENSG00000249637	0.716977	0.000238029	LIHC	Predicted proliferation inducing lncRNAs
ENSG00000250988	1.10191	2.21981e-08	LIHC	Predicted proliferation inducing lncRNAs
ENSG00000251221	0.761433	0.010609	LIHC	Predicted proliferation inducing lncRNAs
ENSG00000254694	0.809695	0.0160685	LIHC	Predicted proliferation inducing lncRNAs
ENSG00000255121	0.869784	2.76125e-05	LIHC	Predicted proliferation inducing lncRNAs
ENSG00000255717	1.7589	3.40142e-20	LIHC	Predicted proliferation inducing lncRNAs
ENSG00000255857	1.08166	3.62826e-07	LIHC	Predicted proliferation inducing lncRNAs
ENSG00000257167	1.76813	3.82949e-13	LIHC	Predicted proliferation inducing lncRNAs
ENSG00000258017	1.51901	4.10308e-06	LIHC	Predicted proliferation inducing lncRNAs
ENSG00000258378	0.784686	0.00565281	LIHC	Predicted proliferation inducing lncRNAs
ENSG00000258857	1.22609	0.000600076	LIHC	Predicted proliferation inducing lncRNAs
ENSG00000259093	1.22039	4.03447e-07	LIHC	Predicted proliferation inducing lncRNAs
ENSG00000259469	1.25742	7.4317e-06	LIHC	Predicted proliferation inducing lncRNAs
ENSG00000260773	1.21426	4.26295e-05	LIHC	Predicted proliferation inducing lncRNAs
ENSG00000261373	1.43256	0.00025467	LIHC	Predicted proliferation inducing lncRNAs
ENSG00000261428	1.00821	4.89732e-05	LIHC	Predicted proliferation inducing lncRNAs
ENSG00000261886	1.01637	0.000441779	LIHC	Predicted proliferation inducing lncRNAs
ENSG00000262222	1.30276	0.000282696	LIHC	Predicted proliferation inducing lncRNAs
ENSG00000263013	1.1184	4.59434e-07	LIHC	Predicted proliferation inducing lncRNAs
ENSG00000263731	1.52887	2.21001e-11	LIHC	Predicted proliferation inducing lncRNAs
ENSG00000264577	1.81439	1.61715e-10	LIHC	Predicted proliferation inducing lncRNAs
ENSG00000266402	1.12873	3.34535e-05	LIHC	Predicted proliferation inducing lncRNAs
ENSG00000266969	1.3056	2.29134e-05	LIHC	Predicted proliferation inducing lncRNAs
ENSG00000267040	0.605351	0.00107551	LIHC	Predicted proliferation inducing lncRNAs
ENSG00000269688	1.28047	4.60676e-06	LIHC	Predicted proliferation inducing lncRNAs
ENSG00000269951	2.05959	8.48553e-10	LIHC	Predicted proliferation inducing lncRNAs
ENSG00000269974	2.23131	1.33147e-13	LIHC	Predicted proliferation inducing lncRNAs
ENSG00000270083	0.964229	0.00050265	LIHC	Predicted proliferation inducing lncRNAs
ENSG00000270141	1.54681	1.40132e-06	LIHC	Predicted proliferation inducing lncRNAs
ENSG00000272716	1.42616	1.72518e-07	LIHC	Predicted proliferation inducing lncRNAs
ENSG00000273162	2.41712	1.64707e-16	LIHC	Predicted proliferation inducing lncRNAs
ENSG00000273449	1.29842	4.22747e-07	LIHC	Predicted proliferation inducing lncRNAs
ENSG00000146666	1.81536	1.31318e-13	LUAD	Predicted proliferation supprssing lncRNAs
ENSG00000185168	-1.08578	1.07951e-06	LUAD	Predicted proliferation supprssing lncRNAs
ENSG00000186056	-0.603103	2.21329e-05	LUAD	Predicted proliferation supprssing lncRNAs
ENSG00000204054	-0.227948	0.0114322	LUAD	Predicted proliferation supprssing lncRNAs
ENSG00000205488	1.42142	8.68213e-10	LUAD	Predicted proliferation supprssing lncRNAs
ENSG00000214145	1.64072	2.28482e-14	LUAD	Predicted proliferation supprssing lncRNAs
ENSG00000223685	-0.52723	0.00303349	LUAD	Predicted proliferation supprssing lncRNAs
ENSG00000223855	-0.759389	0.000174125	LUAD	Predicted proliferation supprssing lncRNAs
ENSG00000224409	1.61774	3.03328e-07	LUAD	Predicted proliferation supprssing lncRNAs
ENSG00000224596	-0.39866	0.00583079	LUAD	Predicted proliferation supprssing lncRNAs
ENSG00000224805	-0.536037	0.00764318	LUAD	Predicted proliferation supprssing lncRNAs
ENSG00000224818	-1.20244	2.09006e-15	LUAD	Predicted proliferation supprssing lncRNAs
ENSG00000224897	0.641465	8.90977e-05	LUAD	Predicted proliferation supprssing lncRNAs
ENSG00000225302	-0.491653	3.34129e-05	LUAD	Predicted proliferation supprssing lncRNAs
ENSG00000225506	0.63383	0.000333402	LUAD	Predicted proliferation supprssing lncRNAs
ENSG00000225511	-0.504486	0.00137798	LUAD	Predicted proliferation supprssing lncRNAs
ENSG00000225764	-1.5634	1.34328e-09	LUAD	Predicted proliferation supprssing lncRNAs
ENSG00000226026	-0.808321	2.88815e-07	LUAD	Predicted proliferation supprssing lncRNAs
ENSG00000227533	0.972935	1.6359e-09	LUAD	Predicted proliferation supprssing lncRNAs
ENSG00000228288	0.371692	0.0152087	LUAD	Predicted proliferation supprssing lncRNAs
ENSG00000228526	-0.632963	5.4191e-06	LUAD	Predicted proliferation supprssing lncRNAs
ENSG00000229109	-0.688079	0.000434482	LUAD	Predicted proliferation supprssing lncRNAs
ENSG00000229647	0.640533	0.0114772	LUAD	Predicted proliferation supprssing lncRNAs
ENSG00000229951	-0.557873	0.00451269	LUAD	Predicted proliferation supprssing lncRNAs
ENSG00000230479	1.34279	2.78125e-10	LUAD	Predicted proliferation supprssing lncRNAs
ENSG00000230939	-1.09778	2.89612e-07	LUAD	Predicted proliferation supprssing lncRNAs
ENSG00000231160	-1.17897	8.23134e-11	LUAD	Predicted proliferation supprssing lncRNAs
ENSG00000231187	-0.444173	0.0111633	LUAD	Predicted proliferation supprssing lncRNAs
ENSG00000231367	-0.519864	0.00155401	LUAD	Predicted proliferation supprssing lncRNAs
ENSG00000231969	-0.50101	0.0280979	LUAD	Predicted proliferation supprssing lncRNAs
ENSG00000232453	-0.545842	0.000408587	LUAD	Predicted proliferation supprssing lncRNAs
ENSG00000232679	1.34957	1.40708e-06	LUAD	Predicted proliferation supprssing lncRNAs
ENSG00000233006	-0.658762	1.67784e-08	LUAD	Predicted proliferation supprssing lncRNAs
ENSG00000233030	0.65491	0.000684274	LUAD	Predicted proliferation supprssing lncRNAs
ENSG00000233077	0.663949	0.000658245	LUAD	Predicted proliferation supprssing lncRNAs
ENSG00000233237	-0.671992	9.63695e-05	LUAD	Predicted proliferation supprssing lncRNAs
ENSG00000233393	-0.80831	0.00211671	LUAD	Predicted proliferation supprssing lncRNAs
ENSG00000233621	-0.711163	8.6329e-08	LUAD	Predicted proliferation supprssing lncRNAs
ENSG00000233818	1.32175	5.84038e-10	LUAD	Predicted proliferation supprssing lncRNAs
ENSG00000234546	-0.600808	5.6755e-06	LUAD	Predicted proliferation supprssing lncRNAs
ENSG00000234807	-0.709209	4.87794e-05	LUAD	Predicted proliferation supprssing lncRNAs
ENSG00000234869	-0.450562	0.00611309	LUAD	Predicted proliferation supprssing lncRNAs
ENSG00000235027	-0.410249	0.033102	LUAD	Predicted proliferation supprssing lncRNAs
ENSG00000235609	0.651795	2.21471e-06	LUAD	Predicted proliferation supprssing lncRNAs
ENSG00000235770	-0.662294	0.00127384	LUAD	Predicted proliferation supprssing lncRNAs
ENSG00000235790	-0.35728	0.0291023	LUAD	Predicted proliferation supprssing lncRNAs
ENSG00000235947	-0.854726	0.000694685	LUAD	Predicted proliferation supprssing lncRNAs
ENSG00000236039	-1.88001	1.81556e-08	LUAD	Predicted proliferation supprssing lncRNAs
ENSG00000236064	0.983619	2.24083e-07	LUAD	Predicted proliferation supprssing lncRNAs
ENSG00000236318	-1.50344	2.46714e-06	LUAD	Predicted proliferation supprssing lncRNAs
ENSG00000236830	-0.657457	1.93785e-07	LUAD	Predicted proliferation supprssing lncRNAs
ENSG00000238290	0.54337	0.000755364	LUAD	Predicted proliferation supprssing lncRNAs
ENSG00000240032	1.44391	4.13011e-10	LUAD	Predicted proliferation supprssing lncRNAs
ENSG00000240875	-1.06104	4.09904e-09	LUAD	Predicted proliferation supprssing lncRNAs
ENSG00000242861	-1.06394	1.37583e-15	LUAD	Predicted proliferation supprssing lncRNAs
ENSG00000243902	-0.598274	0.00375105	LUAD	Predicted proliferation supprssing lncRNAs
ENSG00000244041	-0.400442	2.50782e-05	LUAD	Predicted proliferation supprssing lncRNAs
ENSG00000244541	1.74701	2.48484e-12	LUAD	Predicted proliferation supprssing lncRNAs
ENSG00000245532	-0.685508	0.000147916	LUAD	Predicted proliferation supprssing lncRNAs
ENSG00000245573	-1.13669	5.35988e-17	LUAD	Predicted proliferation supprssing lncRNAs
ENSG00000246640	-0.806728	1.59108e-06	LUAD	Predicted proliferation supprssing lncRNAs
ENSG00000249348	-0.433199	2.96815e-06	LUAD	Predicted proliferation supprssing lncRNAs
ENSG00000250602	-0.75313	6.03288e-06	LUAD	Predicted proliferation supprssing lncRNAs
ENSG00000250608	-0.495988	0.000798308	LUAD	Predicted proliferation supprssing lncRNAs
ENSG00000250786	-1.64669	2.74614e-15	LUAD	Predicted proliferation supprssing lncRNAs
ENSG00000251179	-1.01956	7.66238e-08	LUAD	Predicted proliferation supprssing lncRNAs
ENSG00000251396	0.53004	0.000589472	LUAD	Predicted proliferation supprssing lncRNAs
ENSG00000251432	-0.356182	0.0399562	LUAD	Predicted proliferation supprssing lncRNAs
ENSG00000251562	-0.647577	4.64285e-05	LUAD	Predicted proliferation supprssing lncRNAs
ENSG00000251603	-0.530323	1.81792e-05	LUAD	Predicted proliferation supprssing lncRNAs
ENSG00000253227	1.90374	1.29808e-11	LUAD	Predicted proliferation supprssing lncRNAs
ENSG00000253552	0.655859	0.00119688	LUAD	Predicted proliferation supprssing lncRNAs
ENSG00000253671	-1.76277	1.51661e-10	LUAD	Predicted proliferation supprssing lncRNAs
ENSG00000253944	-0.866904	0.00317039	LUAD	Predicted proliferation supprssing lncRNAs
ENSG00000254109	-1.90993	5.47912e-23	LUAD	Predicted proliferation supprssing lncRNAs
ENSG00000254333	-0.88126	0.000692867	LUAD	Predicted proliferation supprssing lncRNAs
ENSG00000254554	1.53591	4.76566e-15	LUAD	Predicted proliferation supprssing lncRNAs
ENSG00000254847	-1.54923	6.62477e-15	LUAD	Predicted proliferation supprssing lncRNAs
ENSG00000255100	1.33737	3.83889e-09	LUAD	Predicted proliferation supprssing lncRNAs
ENSG00000255306	-0.827153	4.05041e-06	LUAD	Predicted proliferation supprssing lncRNAs
ENSG00000255345	-1.30291	1.3632e-07	LUAD	Predicted proliferation supprssing lncRNAs
ENSG00000257038	-1.13801	1.41326e-12	LUAD	Predicted proliferation supprssing lncRNAs
ENSG00000257086	0.301578	0.0365723	LUAD	Predicted proliferation supprssing lncRNAs
ENSG00000257443	-0.663223	0.00675947	LUAD	Predicted proliferation supprssing lncRNAs
ENSG00000257671	-0.896594	0.000793499	LUAD	Predicted proliferation supprssing lncRNAs
ENSG00000258279	0.818931	0.000912277	LUAD	Predicted proliferation supprssing lncRNAs
ENSG00000258789	-0.597271	0.00137716	LUAD	Predicted proliferation supprssing lncRNAs
ENSG00000259005	-1.56594	3.94337e-11	LUAD	Predicted proliferation supprssing lncRNAs
ENSG00000259604	0.844164	0.00354174	LUAD	Predicted proliferation supprssing lncRNAs
ENSG00000260077	-0.659611	7.89799e-07	LUAD	Predicted proliferation supprssing lncRNAs
ENSG00000260118	-1.36311	1.27408e-14	LUAD	Predicted proliferation supprssing lncRNAs
ENSG00000260160	-0.436471	0.000612142	LUAD	Predicted proliferation supprssing lncRNAs
ENSG00000260641	-0.315101	0.0498069	LUAD	Predicted proliferation supprssing lncRNAs
ENSG00000260911	-0.758419	0.00025491	LUAD	Predicted proliferation supprssing lncRNAs
ENSG00000260971	0.782066	7.09781e-07	LUAD	Predicted proliferation supprssing lncRNAs
ENSG00000261051	1.18656	2.62546e-13	LUAD	Predicted proliferation supprssing lncRNAs
ENSG00000261656	-0.762609	0.000936785	LUAD	Predicted proliferation supprssing lncRNAs
ENSG00000261888	-0.615517	0.000695994	LUAD	Predicted proliferation supprssing lncRNAs
ENSG00000263680	1.35189	1.37605e-10	LUAD	Predicted proliferation supprssing lncRNAs
ENSG00000263718	-0.775875	0.000643295	LUAD	Predicted proliferation supprssing lncRNAs
ENSG00000265413	-1.19158	1.45242e-11	LUAD	Predicted proliferation supprssing lncRNAs
ENSG00000265519	-0.493054	0.000145984	LUAD	Predicted proliferation supprssing lncRNAs
ENSG00000266010	-1.71327	1.23847e-11	LUAD	Predicted proliferation supprssing lncRNAs
ENSG00000266903	0.604416	0.000761624	LUAD	Predicted proliferation supprssing lncRNAs
ENSG00000266970	0.947081	4.48136e-07	LUAD	Predicted proliferation supprssing lncRNAs
ENSG00000267082	-0.605934	1.98077e-06	LUAD	Predicted proliferation supprssing lncRNAs
ENSG00000267288	0.536171	0.0183803	LUAD	Predicted proliferation supprssing lncRNAs
ENSG00000267519	-0.654609	0.000164031	LUAD	Predicted proliferation supprssing lncRNAs
ENSG00000270001	-0.607548	0.000400732	LUAD	Predicted proliferation supprssing lncRNAs
ENSG00000271259	-0.949676	8.5383e-06	LUAD	Predicted proliferation supprssing lncRNAs
ENSG00000271324	-0.568532	1.03286e-05	LUAD	Predicted proliferation supprssing lncRNAs
ENSG00000271327	-0.536597	0.000576834	LUAD	Predicted proliferation supprssing lncRNAs
ENSG00000272081	-0.964337	8.27202e-10	LUAD	Predicted proliferation supprssing lncRNAs
ENSG00000272341	-0.479264	6.17254e-05	LUAD	Predicted proliferation supprssing lncRNAs
ENSG00000272482	-0.561423	0.0082072	LUAD	Predicted proliferation supprssing lncRNAs
ENSG00000272668	-0.860554	0.000227945	LUAD	Predicted proliferation supprssing lncRNAs
ENSG00000272695	-0.511593	0.00384909	LUAD	Predicted proliferation supprssing lncRNAs
ENSG00000272913	-0.270472	0.0333003	LUAD	Predicted proliferation supprssing lncRNAs
ENSG00000272950	-0.426211	0.00327397	LUAD	Predicted proliferation supprssing lncRNAs
ENSG00000273033	-0.346648	0.00167497	LUAD	Predicted proliferation supprssing lncRNAs
ENSG00000273113	-0.971832	1.32502e-06	LUAD	Predicted proliferation supprssing lncRNAs
ENSG00000273305	-0.902243	1.63365e-06	LUAD	Predicted proliferation supprssing lncRNAs
ENSG00000273443	1.29882	3.37554e-07	LUAD	Predicted proliferation supprssing lncRNAs
ENSG00000163597	0.4477	1.66155e-08	LUAD	Predicted proliferation inducing lncRNAs
ENSG00000196756	0.697719	2.19338e-10	LUAD	Predicted proliferation inducing lncRNAs
ENSG00000203362	0.331087	0.00327939	LUAD	Predicted proliferation inducing lncRNAs
ENSG00000224635	0.511403	0.00714085	LUAD	Predicted proliferation inducing lncRNAs
ENSG00000224738	0.676872	4.04438e-07	LUAD	Predicted proliferation inducing lncRNAs
ENSG00000225163	0.91439	8.87295e-06	LUAD	Predicted proliferation inducing lncRNAs
ENSG00000225675	0.839608	5.67606e-05	LUAD	Predicted proliferation inducing lncRNAs
ENSG00000226688	0.206932	0.0196865	LUAD	Predicted proliferation inducing lncRNAs
ENSG00000227598	0.426505	0.0169394	LUAD	Predicted proliferation inducing lncRNAs
ENSG00000231607	0.977875	1.01186e-14	LUAD	Predicted proliferation inducing lncRNAs
ENSG00000232956	0.431709	0.000372066	LUAD	Predicted proliferation inducing lncRNAs
ENSG00000233844	0.686575	0.00610098	LUAD	Predicted proliferation inducing lncRNAs
ENSG00000234129	1.05205	2.10026e-17	LUAD	Predicted proliferation inducing lncRNAs
ENSG00000234171	0.76404	5.07321e-11	LUAD	Predicted proliferation inducing lncRNAs
ENSG00000234327	0.582478	9.01608e-05	LUAD	Predicted proliferation inducing lncRNAs
ENSG00000236200	0.270899	0.0355004	LUAD	Predicted proliferation inducing lncRNAs
ENSG00000236308	-0.517025	0.00513217	LUAD	Predicted proliferation inducing lncRNAs
ENSG00000245248	0.511747	0.00841338	LUAD	Predicted proliferation inducing lncRNAs
ENSG00000247092	0.469863	0.000110958	LUAD	Predicted proliferation inducing lncRNAs
ENSG00000247240	0.314381	0.00107066	LUAD	Predicted proliferation inducing lncRNAs
ENSG00000255121	0.49061	0.000812071	LUAD	Predicted proliferation inducing lncRNAs
ENSG00000255717	0.958015	7.92792e-17	LUAD	Predicted proliferation inducing lncRNAs
ENSG00000257167	2.08366	4.76139e-34	LUAD	Predicted proliferation inducing lncRNAs
ENSG00000257497	0.363277	0.0452713	LUAD	Predicted proliferation inducing lncRNAs
ENSG00000258017	0.77445	3.17454e-05	LUAD	Predicted proliferation inducing lncRNAs
ENSG00000258344	0.891786	1.05244e-05	LUAD	Predicted proliferation inducing lncRNAs
ENSG00000259093	0.500035	6.62036e-05	LUAD	Predicted proliferation inducing lncRNAs
ENSG00000259469	0.749113	2.69446e-05	LUAD	Predicted proliferation inducing lncRNAs
ENSG00000260213	0.470522	2.62739e-05	LUAD	Predicted proliferation inducing lncRNAs
ENSG00000260260	-0.414179	0.0042111	LUAD	Predicted proliferation inducing lncRNAs
ENSG00000260773	-0.615607	0.000434196	LUAD	Predicted proliferation inducing lncRNAs
ENSG00000261373	1.16877	1.13661e-08	LUAD	Predicted proliferation inducing lncRNAs
ENSG00000262222	-0.354188	0.0362549	LUAD	Predicted proliferation inducing lncRNAs
ENSG00000262703	1.1585	1.23695e-10	LUAD	Predicted proliferation inducing lncRNAs
ENSG00000263013	-0.351256	0.00839959	LUAD	Predicted proliferation inducing lncRNAs
ENSG00000263731	0.667407	8.87716e-09	LUAD	Predicted proliferation inducing lncRNAs
ENSG00000264577	0.336422	0.0119368	LUAD	Predicted proliferation inducing lncRNAs
ENSG00000266402	0.565116	0.000771397	LUAD	Predicted proliferation inducing lncRNAs
ENSG00000266969	0.477312	0.00437159	LUAD	Predicted proliferation inducing lncRNAs
ENSG00000267150	0.356269	0.0454185	LUAD	Predicted proliferation inducing lncRNAs
ENSG00000269534	0.626888	0.00199737	LUAD	Predicted proliferation inducing lncRNAs
ENSG00000269974	1.61979	3.92528e-19	LUAD	Predicted proliferation inducing lncRNAs
ENSG00000270083	-0.338231	0.0229693	LUAD	Predicted proliferation inducing lncRNAs
ENSG00000270141	0.667671	0.00132729	LUAD	Predicted proliferation inducing lncRNAs
ENSG00000272716	0.759997	2.31517e-05	LUAD	Predicted proliferation inducing lncRNAs
ENSG00000273162	1.26791	6.13657e-19	LUAD	Predicted proliferation inducing lncRNAs
ENSG00000223685	0.484778	0.0220424	OV	Predicted proliferation supprssing lncRNAs
ENSG00000224805	-0.568558	0.0314567	OV	Predicted proliferation supprssing lncRNAs
ENSG00000226026	-0.406482	0.0232284	OV	Predicted proliferation supprssing lncRNAs
ENSG00000228791	0.688825	0.00340047	OV	Predicted proliferation supprssing lncRNAs
ENSG00000231742	0.580084	0.036281	OV	Predicted proliferation supprssing lncRNAs
ENSG00000232679	-1.27978	0.00536907	OV	Predicted proliferation supprssing lncRNAs
ENSG00000233006	-0.423552	0.0180953	OV	Predicted proliferation supprssing lncRNAs
ENSG00000233077	0.538659	0.0122925	OV	Predicted proliferation supprssing lncRNAs
ENSG00000233393	1.03074	0.0219792	OV	Predicted proliferation supprssing lncRNAs
ENSG00000233901	-0.59056	0.0440833	OV	Predicted proliferation supprssing lncRNAs
ENSG00000234807	-0.720871	0.00951772	OV	Predicted proliferation supprssing lncRNAs
ENSG00000235770	-0.554164	0.00521771	OV	Predicted proliferation supprssing lncRNAs
ENSG00000236830	0.384668	0.00258869	OV	Predicted proliferation supprssing lncRNAs
ENSG00000240032	0.964038	0.00332614	OV	Predicted proliferation supprssing lncRNAs
ENSG00000245532	-0.568435	0.0495157	OV	Predicted proliferation supprssing lncRNAs
ENSG00000249348	-0.323726	0.0290654	OV	Predicted proliferation supprssing lncRNAs
ENSG00000254109	-0.553043	0.0441112	OV	Predicted proliferation supprssing lncRNAs
ENSG00000254837	0.407695	0.00750237	OV	Predicted proliferation supprssing lncRNAs
ENSG00000256894	-0.787413	0.00794364	OV	Predicted proliferation supprssing lncRNAs
ENSG00000257671	-1.19823	0.000492948	OV	Predicted proliferation supprssing lncRNAs
ENSG00000257829	-0.742775	0.0397406	OV	Predicted proliferation supprssing lncRNAs
ENSG00000258955	-1.05984	0.000491662	OV	Predicted proliferation supprssing lncRNAs
ENSG00000260971	0.994084	9.35193e-06	OV	Predicted proliferation supprssing lncRNAs
ENSG00000261051	0.831543	0.00160491	OV	Predicted proliferation supprssing lncRNAs
ENSG00000261656	-1.0114	0.00040969	OV	Predicted proliferation supprssing lncRNAs
ENSG00000263680	0.613783	0.027892	OV	Predicted proliferation supprssing lncRNAs
ENSG00000266903	0.540471	0.0375198	OV	Predicted proliferation supprssing lncRNAs
ENSG00000268621	-1.05213	0.045507	OV	Predicted proliferation supprssing lncRNAs
ENSG00000270557	0.515143	0.0327727	OV	Predicted proliferation supprssing lncRNAs
ENSG00000272138	1.071	0.000347102	OV	Predicted proliferation supprssing lncRNAs
ENSG00000272512	1.30351	0.000312081	OV	Predicted proliferation supprssing lncRNAs
ENSG00000272695	-0.541945	0.0416773	OV	Predicted proliferation supprssing lncRNAs
ENSG00000272950	-0.702798	0.0140662	OV	Predicted proliferation supprssing lncRNAs
ENSG00000273113	-0.549832	0.0393076	OV	Predicted proliferation supprssing lncRNAs
ENSG00000196756	0.351396	0.0335515	OV	Predicted proliferation inducing lncRNAs
ENSG00000203362	0.956454	1.50397e-09	OV	Predicted proliferation inducing lncRNAs
ENSG00000215417	0.928026	3.03227e-05	OV	Predicted proliferation inducing lncRNAs
ENSG00000224738	0.952776	4.18025e-09	OV	Predicted proliferation inducing lncRNAs
ENSG00000225163	0.730398	0.0145514	OV	Predicted proliferation inducing lncRNAs
ENSG00000226688	0.247362	0.0388183	OV	Predicted proliferation inducing lncRNAs
ENSG00000227598	0.953537	0.000159381	OV	Predicted proliferation inducing lncRNAs
ENSG00000231607	1.1872	6.06141e-13	OV	Predicted proliferation inducing lncRNAs
ENSG00000232956	0.295712	0.0469894	OV	Predicted proliferation inducing lncRNAs
ENSG00000234129	1.17133	1.94946e-16	OV	Predicted proliferation inducing lncRNAs
ENSG00000234160	0.409042	0.0340529	OV	Predicted proliferation inducing lncRNAs
ENSG00000234171	0.698187	1.43335e-05	OV	Predicted proliferation inducing lncRNAs
ENSG00000234264	1.84224	6.99426e-16	OV	Predicted proliferation inducing lncRNAs
ENSG00000234327	0.846606	0.000262723	OV	Predicted proliferation inducing lncRNAs
ENSG00000236200	0.73047	0.000108112	OV	Predicted proliferation inducing lncRNAs
ENSG00000237718	0.547182	0.0082937	OV	Predicted proliferation inducing lncRNAs
ENSG00000237976	0.925259	0.000142841	OV	Predicted proliferation inducing lncRNAs
ENSG00000242125	-0.752754	0.00639315	OV	Predicted proliferation inducing lncRNAs
ENSG00000244332	2.17928	6.22307e-11	OV	Predicted proliferation inducing lncRNAs
ENSG00000247092	0.517792	0.00264719	OV	Predicted proliferation inducing lncRNAs
ENSG00000247151	0.793784	5.72893e-05	OV	Predicted proliferation inducing lncRNAs
ENSG00000247240	0.441123	0.000147935	OV	Predicted proliferation inducing lncRNAs
ENSG00000251221	0.842404	0.00380229	OV	Predicted proliferation inducing lncRNAs
ENSG00000255121	0.649213	0.00111708	OV	Predicted proliferation inducing lncRNAs
ENSG00000255717	0.571783	9.1887e-06	OV	Predicted proliferation inducing lncRNAs
ENSG00000255857	0.565898	9.85417e-05	OV	Predicted proliferation inducing lncRNAs
ENSG00000257167	1.38919	1.94946e-16	OV	Predicted proliferation inducing lncRNAs
ENSG00000257285	0.534641	0.0480304	OV	Predicted proliferation inducing lncRNAs
ENSG00000258017	0.541169	0.0457765	OV	Predicted proliferation inducing lncRNAs
ENSG00000258344	0.914498	0.000233996	OV	Predicted proliferation inducing lncRNAs
ENSG00000258857	0.781661	0.0197329	OV	Predicted proliferation inducing lncRNAs
ENSG00000259093	0.838024	5.35636e-11	OV	Predicted proliferation inducing lncRNAs
ENSG00000259488	0.86123	0.00014673	OV	Predicted proliferation inducing lncRNAs
ENSG00000260213	0.511357	0.00866993	OV	Predicted proliferation inducing lncRNAs
ENSG00000261886	0.684381	0.00488307	OV	Predicted proliferation inducing lncRNAs
ENSG00000262703	1.22954	2.23129e-08	OV	Predicted proliferation inducing lncRNAs
ENSG00000263731	0.718866	1.89289e-06	OV	Predicted proliferation inducing lncRNAs
ENSG00000264577	0.591531	0.000248981	OV	Predicted proliferation inducing lncRNAs
ENSG00000266969	1.18427	1.99281e-08	OV	Predicted proliferation inducing lncRNAs
ENSG00000267150	0.623785	0.0119011	OV	Predicted proliferation inducing lncRNAs
ENSG00000268289	1.23957	0.00132191	OV	Predicted proliferation inducing lncRNAs
ENSG00000269534	0.896633	0.00014721	OV	Predicted proliferation inducing lncRNAs
ENSG00000269688	1.0482	4.91864e-05	OV	Predicted proliferation inducing lncRNAs
ENSG00000269974	1.21938	1.99281e-08	OV	Predicted proliferation inducing lncRNAs
ENSG00000272716	0.687085	0.00191355	OV	Predicted proliferation inducing lncRNAs
ENSG00000273162	1.25742	2.71068e-12	OV	Predicted proliferation inducing lncRNAs
ENSG00000273449	0.569447	0.0137152	OV	Predicted proliferation inducing lncRNAs
ENSG00000224805	-1.39054	6.69795e-05	SKCM	Predicted proliferation supprssing lncRNAs
ENSG00000224818	-1.08391	0.00399082	SKCM	Predicted proliferation supprssing lncRNAs
ENSG00000225511	-0.900676	0.0091789	SKCM	Predicted proliferation supprssing lncRNAs
ENSG00000226332	0.846405	0.0138909	SKCM	Predicted proliferation supprssing lncRNAs
ENSG00000228526	-0.828263	0.0308589	SKCM	Predicted proliferation supprssing lncRNAs
ENSG00000231312	-0.383822	0.0439268	SKCM	Predicted proliferation supprssing lncRNAs
ENSG00000232453	-0.691791	0.0176283	SKCM	Predicted proliferation supprssing lncRNAs
ENSG00000234546	-1.10356	0.00215182	SKCM	Predicted proliferation supprssing lncRNAs
ENSG00000242861	-0.64324	0.0230279	SKCM	Predicted proliferation supprssing lncRNAs
ENSG00000254109	-0.750151	0.049751	SKCM	Predicted proliferation supprssing lncRNAs
ENSG00000272081	-0.415955	0.0377939	SKCM	Predicted proliferation supprssing lncRNAs
ENSG00000272950	-0.775286	0.0317208	SKCM	Predicted proliferation supprssing lncRNAs
ENSG00000272953	0.702615	0.00872272	SKCM	Predicted proliferation supprssing lncRNAs
ENSG00000196756	0.659035	0.00141348	SKCM	Predicted proliferation inducing lncRNAs
ENSG00000203362	0.903237	9.2572e-05	SKCM	Predicted proliferation inducing lncRNAs
ENSG00000215417	1.26116	0.00013607	SKCM	Predicted proliferation inducing lncRNAs
ENSG00000224635	0.847213	0.0129815	SKCM	Predicted proliferation inducing lncRNAs
ENSG00000225163	1.28106	0.0016036	SKCM	Predicted proliferation inducing lncRNAs
ENSG00000226688	0.562065	0.00127803	SKCM	Predicted proliferation inducing lncRNAs
ENSG00000227598	0.719405	0.0389184	SKCM	Predicted proliferation inducing lncRNAs
ENSG00000227963	0.822548	6.66974e-06	SKCM	Predicted proliferation inducing lncRNAs
ENSG00000228302	1.05045	0.00028969	SKCM	Predicted proliferation inducing lncRNAs
ENSG00000231607	1.17268	4.32593e-06	SKCM	Predicted proliferation inducing lncRNAs
ENSG00000233844	1.2734	0.0181412	SKCM	Predicted proliferation inducing lncRNAs
ENSG00000234129	1.21785	1.15281e-09	SKCM	Predicted proliferation inducing lncRNAs
ENSG00000234171	0.523695	0.00492026	SKCM	Predicted proliferation inducing lncRNAs
ENSG00000234264	1.52383	2.06737e-09	SKCM	Predicted proliferation inducing lncRNAs
ENSG00000234753	1.06705	0.0171571	SKCM	Predicted proliferation inducing lncRNAs
ENSG00000236200	0.683934	0.00238514	SKCM	Predicted proliferation inducing lncRNAs
ENSG00000237718	0.733476	0.0248936	SKCM	Predicted proliferation inducing lncRNAs
ENSG00000242125	1.43908	0.000647688	SKCM	Predicted proliferation inducing lncRNAs
ENSG00000245248	0.86037	0.00457285	SKCM	Predicted proliferation inducing lncRNAs
ENSG00000247092	1.00841	6.66974e-06	SKCM	Predicted proliferation inducing lncRNAs
ENSG00000247240	0.672741	1.60584e-05	SKCM	Predicted proliferation inducing lncRNAs
ENSG00000249637	0.6364	0.0136408	SKCM	Predicted proliferation inducing lncRNAs
ENSG00000250988	0.726621	0.00252999	SKCM	Predicted proliferation inducing lncRNAs
ENSG00000254694	1.16759	0.00282418	SKCM	Predicted proliferation inducing lncRNAs
ENSG00000255717	1.00477	4.48648e-05	SKCM	Predicted proliferation inducing lncRNAs
ENSG00000255857	0.435628	0.0111354	SKCM	Predicted proliferation inducing lncRNAs
ENSG00000257167	0.985438	1.34441e-05	SKCM	Predicted proliferation inducing lncRNAs
ENSG00000257497	0.933105	0.0179533	SKCM	Predicted proliferation inducing lncRNAs
ENSG00000258344	1.18888	0.000159852	SKCM	Predicted proliferation inducing lncRNAs
ENSG00000259093	0.454663	0.0289144	SKCM	Predicted proliferation inducing lncRNAs
ENSG00000260260	0.584951	0.0389184	SKCM	Predicted proliferation inducing lncRNAs
ENSG00000260773	0.813705	0.0345329	SKCM	Predicted proliferation inducing lncRNAs
ENSG00000261373	0.95842	0.0189723	SKCM	Predicted proliferation inducing lncRNAs
ENSG00000263731	0.717728	0.00119545	SKCM	Predicted proliferation inducing lncRNAs
ENSG00000264577	1.16516	4.02534e-05	SKCM	Predicted proliferation inducing lncRNAs
ENSG00000266402	0.951957	0.000211099	SKCM	Predicted proliferation inducing lncRNAs
ENSG00000266801	0.666009	0.0220303	SKCM	Predicted proliferation inducing lncRNAs
ENSG00000266969	0.836508	0.0344256	SKCM	Predicted proliferation inducing lncRNAs
ENSG00000267150	0.902612	0.00371822	SKCM	Predicted proliferation inducing lncRNAs
ENSG00000269688	1.31882	9.49554e-05	SKCM	Predicted proliferation inducing lncRNAs
ENSG00000269951	1.72802	2.06737e-09	SKCM	Predicted proliferation inducing lncRNAs
ENSG00000269974	1.9809	3.55559e-07	SKCM	Predicted proliferation inducing lncRNAs
ENSG00000270083	0.975835	0.00308413	SKCM	Predicted proliferation inducing lncRNAs
ENSG00000272716	1.2098	0.000119369	SKCM	Predicted proliferation inducing lncRNAs
ENSG00000273162	1.67799	3.55559e-07	SKCM	Predicted proliferation inducing lncRNAs
ENSG00000273449	0.917365	0.0247254	SKCM	Predicted proliferation inducing lncRNAs
ENSG00000185186	-0.670094	0.000685498	STAD	Predicted proliferation supprssing lncRNAs
ENSG00000214145	0.548565	0.0232023	STAD	Predicted proliferation supprssing lncRNAs
ENSG00000224596	-0.474186	0.01272	STAD	Predicted proliferation supprssing lncRNAs
ENSG00000224805	0.558292	0.0376107	STAD	Predicted proliferation supprssing lncRNAs
ENSG00000224818	-1.27612	8.75879e-08	STAD	Predicted proliferation supprssing lncRNAs
ENSG00000225506	0.880939	0.00268687	STAD	Predicted proliferation supprssing lncRNAs
ENSG00000226332	0.510806	0.0294286	STAD	Predicted proliferation supprssing lncRNAs
ENSG00000230479	-0.690837	0.00687904	STAD	Predicted proliferation supprssing lncRNAs
ENSG00000231160	-0.60385	0.016127	STAD	Predicted proliferation supprssing lncRNAs
ENSG00000231187	-0.75357	0.00528014	STAD	Predicted proliferation supprssing lncRNAs
ENSG00000231312	-0.333599	0.00749633	STAD	Predicted proliferation supprssing lncRNAs
ENSG00000231367	-1.56567	2.7121e-10	STAD	Predicted proliferation supprssing lncRNAs
ENSG00000233237	-1.69037	3.45023e-10	STAD	Predicted proliferation supprssing lncRNAs
ENSG00000233818	-0.747347	0.00524702	STAD	Predicted proliferation supprssing lncRNAs
ENSG00000233895	-0.609808	0.000773044	STAD	Predicted proliferation supprssing lncRNAs
ENSG00000233901	-0.757789	0.00440136	STAD	Predicted proliferation supprssing lncRNAs
ENSG00000234807	-0.617369	0.00227827	STAD	Predicted proliferation supprssing lncRNAs
ENSG00000234840	-0.662717	0.0395773	STAD	Predicted proliferation supprssing lncRNAs
ENSG00000235947	-0.980074	1.57356e-05	STAD	Predicted proliferation supprssing lncRNAs
ENSG00000236830	0.412924	0.00401738	STAD	Predicted proliferation supprssing lncRNAs
ENSG00000237512	-0.883012	0.0148008	STAD	Predicted proliferation supprssing lncRNAs
ENSG00000237807	-2.3227	1.17912e-11	STAD	Predicted proliferation supprssing lncRNAs
ENSG00000240032	-0.740984	0.00976212	STAD	Predicted proliferation supprssing lncRNAs
ENSG00000240875	-0.738666	0.0149516	STAD	Predicted proliferation supprssing lncRNAs
ENSG00000244041	0.38283	0.00640689	STAD	Predicted proliferation supprssing lncRNAs
ENSG00000245573	-0.526897	0.00367047	STAD	Predicted proliferation supprssing lncRNAs
ENSG00000248429	-1.08367	0.000260168	STAD	Predicted proliferation supprssing lncRNAs
ENSG00000249348	-0.308505	0.0251597	STAD	Predicted proliferation supprssing lncRNAs
ENSG00000250303	-0.811872	0.000425817	STAD	Predicted proliferation supprssing lncRNAs
ENSG00000251179	-0.534657	0.0427281	STAD	Predicted proliferation supprssing lncRNAs
ENSG00000251432	0.515854	0.0323778	STAD	Predicted proliferation supprssing lncRNAs
ENSG00000251603	0.938643	2.83425e-05	STAD	Predicted proliferation supprssing lncRNAs
ENSG00000253227	0.929133	0.0285568	STAD	Predicted proliferation supprssing lncRNAs
ENSG00000253438	0.669392	0.00270872	STAD	Predicted proliferation supprssing lncRNAs
ENSG00000253552	-0.567035	0.0333912	STAD	Predicted proliferation supprssing lncRNAs
ENSG00000254109	-1.14584	0.000158068	STAD	Predicted proliferation supprssing lncRNAs
ENSG00000254286	0.602497	0.00172135	STAD	Predicted proliferation supprssing lncRNAs
ENSG00000254837	0.547896	0.000738159	STAD	Predicted proliferation supprssing lncRNAs
ENSG00000254847	-1.51338	3.11672e-07	STAD	Predicted proliferation supprssing lncRNAs
ENSG00000255471	-1.62357	4.46893e-13	STAD	Predicted proliferation supprssing lncRNAs
ENSG00000256894	-1.21339	0.000132743	STAD	Predicted proliferation supprssing lncRNAs
ENSG00000257038	-1.04405	0.000350418	STAD	Predicted proliferation supprssing lncRNAs
ENSG00000257086	0.916025	6.53537e-05	STAD	Predicted proliferation supprssing lncRNAs
ENSG00000257443	0.755693	0.00252975	STAD	Predicted proliferation supprssing lncRNAs
ENSG00000258955	-0.938041	7.05068e-06	STAD	Predicted proliferation supprssing lncRNAs
ENSG00000259275	-1.58538	1.61514e-12	STAD	Predicted proliferation supprssing lncRNAs
ENSG00000259370	-0.798423	0.00825423	STAD	Predicted proliferation supprssing lncRNAs
ENSG00000260077	-0.92141	5.03347e-06	STAD	Predicted proliferation supprssing lncRNAs
ENSG00000261051	-0.792613	0.000191462	STAD	Predicted proliferation supprssing lncRNAs
ENSG00000261888	-1.05216	4.05146e-07	STAD	Predicted proliferation supprssing lncRNAs
ENSG00000262903	0.62718	0.0139955	STAD	Predicted proliferation supprssing lncRNAs
ENSG00000263680	0.713925	0.00610059	STAD	Predicted proliferation supprssing lncRNAs
ENSG00000265519	-1.49498	1.54494e-07	STAD	Predicted proliferation supprssing lncRNAs
ENSG00000267082	-0.775179	0.000141269	STAD	Predicted proliferation supprssing lncRNAs
ENSG00000267922	1.24271	0.00116227	STAD	Predicted proliferation supprssing lncRNAs
ENSG00000268621	1.18423	0.0254094	STAD	Predicted proliferation supprssing lncRNAs
ENSG00000269895	-0.92599	0.000961827	STAD	Predicted proliferation supprssing lncRNAs
ENSG00000270210	-0.938637	8.69037e-06	STAD	Predicted proliferation supprssing lncRNAs
ENSG00000272088	1.26396	0.000334154	STAD	Predicted proliferation supprssing lncRNAs
ENSG00000272482	-1.10144	0.000238279	STAD	Predicted proliferation supprssing lncRNAs
ENSG00000272695	-0.970148	3.99634e-05	STAD	Predicted proliferation supprssing lncRNAs
ENSG00000272950	-0.379495	0.0403654	STAD	Predicted proliferation supprssing lncRNAs
ENSG00000272953	0.857855	9.03904e-05	STAD	Predicted proliferation supprssing lncRNAs
ENSG00000273033	-0.531461	0.00297197	STAD	Predicted proliferation supprssing lncRNAs
ENSG00000273123	-1.43037	6.02861e-08	STAD	Predicted proliferation supprssing lncRNAs
ENSG00000273443	0.938664	0.00264054	STAD	Predicted proliferation supprssing lncRNAs
ENSG00000163597	0.668109	1.17399e-06	STAD	Predicted proliferation inducing lncRNAs
ENSG00000196756	1.27955	1.242e-13	STAD	Predicted proliferation inducing lncRNAs
ENSG00000203362	1.24409	2.70117e-12	STAD	Predicted proliferation inducing lncRNAs
ENSG00000203875	0.619806	0.000506318	STAD	Predicted proliferation inducing lncRNAs
ENSG00000215417	1.73651	1.36716e-13	STAD	Predicted proliferation inducing lncRNAs
ENSG00000224635	1.71782	9.3235e-13	STAD	Predicted proliferation inducing lncRNAs
ENSG00000224738	0.566932	0.000693343	STAD	Predicted proliferation inducing lncRNAs
ENSG00000225163	1.29084	8.10337e-06	STAD	Predicted proliferation inducing lncRNAs
ENSG00000226950	1.05667	2.69822e-10	STAD	Predicted proliferation inducing lncRNAs
ENSG00000227598	0.715744	0.000465265	STAD	Predicted proliferation inducing lncRNAs
ENSG00000228302	0.587692	0.00282655	STAD	Predicted proliferation inducing lncRNAs
ENSG00000231607	1.63166	1.26444e-16	STAD	Predicted proliferation inducing lncRNAs
ENSG00000232956	1.21671	2.09307e-20	STAD	Predicted proliferation inducing lncRNAs
ENSG00000233016	0.871527	6.75088e-09	STAD	Predicted proliferation inducing lncRNAs
ENSG00000234129	1.15448	1.57749e-14	STAD	Predicted proliferation inducing lncRNAs
ENSG00000234160	0.735923	2.79083e-05	STAD	Predicted proliferation inducing lncRNAs
ENSG00000234171	0.866643	2.13063e-07	STAD	Predicted proliferation inducing lncRNAs
ENSG00000234327	0.587625	0.000387269	STAD	Predicted proliferation inducing lncRNAs
ENSG00000234753	1.67727	9.00608e-12	STAD	Predicted proliferation inducing lncRNAs
ENSG00000236200	1.20808	2.22198e-13	STAD	Predicted proliferation inducing lncRNAs
ENSG00000244332	1.62895	2.30281e-06	STAD	Predicted proliferation inducing lncRNAs
ENSG00000245248	0.883829	0.000182199	STAD	Predicted proliferation inducing lncRNAs
ENSG00000247092	1.18558	4.10744e-13	STAD	Predicted proliferation inducing lncRNAs
ENSG00000247240	0.729536	5.98438e-08	STAD	Predicted proliferation inducing lncRNAs
ENSG00000248996	-1.04749	0.00171831	STAD	Predicted proliferation inducing lncRNAs
ENSG00000249637	0.690361	3.97171e-06	STAD	Predicted proliferation inducing lncRNAs
ENSG00000250988	1.04526	1.21265e-13	STAD	Predicted proliferation inducing lncRNAs
ENSG00000254694	1.00753	2.63501e-05	STAD	Predicted proliferation inducing lncRNAs
ENSG00000255121	0.606237	0.0028541	STAD	Predicted proliferation inducing lncRNAs
ENSG00000255717	1.72897	1.40304e-31	STAD	Predicted proliferation inducing lncRNAs
ENSG00000255857	0.695384	6.75675e-06	STAD	Predicted proliferation inducing lncRNAs
ENSG00000257167	1.13826	5.05469e-08	STAD	Predicted proliferation inducing lncRNAs
ENSG00000257497	0.543436	0.0324254	STAD	Predicted proliferation inducing lncRNAs
ENSG00000258017	1.00955	3.03047e-05	STAD	Predicted proliferation inducing lncRNAs
ENSG00000258344	0.678542	0.0125656	STAD	Predicted proliferation inducing lncRNAs
ENSG00000258378	1.07704	5.89582e-07	STAD	Predicted proliferation inducing lncRNAs
ENSG00000258857	0.987971	0.00355886	STAD	Predicted proliferation inducing lncRNAs
ENSG00000259093	1.07962	6.87254e-12	STAD	Predicted proliferation inducing lncRNAs
ENSG00000259254	1.47747	2.50426e-10	STAD	Predicted proliferation inducing lncRNAs
ENSG00000260260	0.887584	3.62357e-09	STAD	Predicted proliferation inducing lncRNAs
ENSG00000260773	0.849194	0.00282197	STAD	Predicted proliferation inducing lncRNAs
ENSG00000261373	1.83353	2.7323e-13	STAD	Predicted proliferation inducing lncRNAs
ENSG00000262222	0.79832	0.000733331	STAD	Predicted proliferation inducing lncRNAs
ENSG00000262703	1.23056	2.56136e-07	STAD	Predicted proliferation inducing lncRNAs
ENSG00000263013	0.805371	0.000105142	STAD	Predicted proliferation inducing lncRNAs
ENSG00000263731	1.17328	2.28957e-13	STAD	Predicted proliferation inducing lncRNAs
ENSG00000264577	1.24052	9.25938e-12	STAD	Predicted proliferation inducing lncRNAs
ENSG00000266402	1.49555	2.08202e-14	STAD	Predicted proliferation inducing lncRNAs
ENSG00000266969	1.58365	7.6196e-11	STAD	Predicted proliferation inducing lncRNAs
ENSG00000267040	-0.363208	0.0365576	STAD	Predicted proliferation inducing lncRNAs
ENSG00000269534	1.17411	3.86237e-06	STAD	Predicted proliferation inducing lncRNAs
ENSG00000269947	0.678146	0.00143193	STAD	Predicted proliferation inducing lncRNAs
ENSG00000269951	1.20365	9.98994e-09	STAD	Predicted proliferation inducing lncRNAs
ENSG00000269974	1.88236	1.42257e-14	STAD	Predicted proliferation inducing lncRNAs
ENSG00000270141	0.805139	0.000898939	STAD	Predicted proliferation inducing lncRNAs
ENSG00000272716	1.17192	4.72448e-08	STAD	Predicted proliferation inducing lncRNAs
ENSG00000273162	1.80645	1.0667e-23	STAD	Predicted proliferation inducing lncRNAs
ENSG00000273449	0.739884	0.000996976	STAD	Predicted proliferation inducing lncRNAs
ENSG00000186056	-0.894372	0.000149895	UCEC	Predicted proliferation supprssing lncRNAs
ENSG00000204054	-0.801205	3.12538e-09	UCEC	Predicted proliferation supprssing lncRNAs
ENSG00000224596	-0.499372	0.00600155	UCEC	Predicted proliferation supprssing lncRNAs
ENSG00000224897	0.560362	0.00259694	UCEC	Predicted proliferation supprssing lncRNAs
ENSG00000225302	-0.689994	0.0384237	UCEC	Predicted proliferation supprssing lncRNAs
ENSG00000228526	-0.887223	0.0122347	UCEC	Predicted proliferation supprssing lncRNAs
ENSG00000231160	-0.834434	0.000436659	UCEC	Predicted proliferation supprssing lncRNAs
ENSG00000231713	-0.85446	0.00835264	UCEC	Predicted proliferation supprssing lncRNAs
ENSG00000234546	-0.647701	0.0131088	UCEC	Predicted proliferation supprssing lncRNAs
ENSG00000234899	-0.644039	0.00129269	UCEC	Predicted proliferation supprssing lncRNAs
ENSG00000235770	-0.343372	0.0185047	UCEC	Predicted proliferation supprssing lncRNAs
ENSG00000236830	-0.571814	0.000824164	UCEC	Predicted proliferation supprssing lncRNAs
ENSG00000240875	-1.13907	3.40684e-05	UCEC	Predicted proliferation supprssing lncRNAs
ENSG00000245573	-0.378448	0.019346	UCEC	Predicted proliferation supprssing lncRNAs
ENSG00000248429	-1.29709	1.13526e-05	UCEC	Predicted proliferation supprssing lncRNAs
ENSG00000249348	0.853402	1.3629e-05	UCEC	Predicted proliferation supprssing lncRNAs
ENSG00000251396	-0.849332	0.00397498	UCEC	Predicted proliferation supprssing lncRNAs
ENSG00000251432	-0.845412	0.000123432	UCEC	Predicted proliferation supprssing lncRNAs
ENSG00000254109	-1.27333	4.49389e-05	UCEC	Predicted proliferation supprssing lncRNAs
ENSG00000254837	0.28467	0.0373125	UCEC	Predicted proliferation supprssing lncRNAs
ENSG00000259354	-0.750364	0.0085688	UCEC	Predicted proliferation supprssing lncRNAs
ENSG00000260032	0.582024	1.4451e-08	UCEC	Predicted proliferation supprssing lncRNAs
ENSG00000265519	0.718442	0.00261322	UCEC	Predicted proliferation supprssing lncRNAs
ENSG00000273443	1.17994	0.00273566	UCEC	Predicted proliferation supprssing lncRNAs
ENSG00000163597	0.814089	4.27467e-10	UCEC	Predicted proliferation inducing lncRNAs
ENSG00000196756	0.592119	3.11189e-05	UCEC	Predicted proliferation inducing lncRNAs
ENSG00000203875	0.488146	0.0175733	UCEC	Predicted proliferation inducing lncRNAs
ENSG00000215417	1.61271	1.43707e-09	UCEC	Predicted proliferation inducing lncRNAs
ENSG00000224635	0.675954	0.0106217	UCEC	Predicted proliferation inducing lncRNAs
ENSG00000224738	0.651854	0.001058	UCEC	Predicted proliferation inducing lncRNAs
ENSG00000231607	1.71025	8.66013e-18	UCEC	Predicted proliferation inducing lncRNAs
ENSG00000232956	0.557001	6.68837e-07	UCEC	Predicted proliferation inducing lncRNAs
ENSG00000234160	1.04213	1.7782e-09	UCEC	Predicted proliferation inducing lncRNAs
ENSG00000234171	0.476736	0.000220924	UCEC	Predicted proliferation inducing lncRNAs
ENSG00000234264	2.10921	2.28367e-14	UCEC	Predicted proliferation inducing lncRNAs
ENSG00000236200	0.390561	0.00622681	UCEC	Predicted proliferation inducing lncRNAs
ENSG00000247151	0.588531	0.000240342	UCEC	Predicted proliferation inducing lncRNAs
ENSG00000247240	0.671502	6.80896e-13	UCEC	Predicted proliferation inducing lncRNAs
ENSG00000255717	1.07991	2.66115e-14	UCEC	Predicted proliferation inducing lncRNAs
ENSG00000257167	1.55903	1.40923e-11	UCEC	Predicted proliferation inducing lncRNAs
ENSG00000259488	1.29183	3.44103e-06	UCEC	Predicted proliferation inducing lncRNAs
ENSG00000261373	0.62743	0.00392643	UCEC	Predicted proliferation inducing lncRNAs
ENSG00000264577	0.936924	3.60433e-07	UCEC	Predicted proliferation inducing lncRNAs
ENSG00000266402	1.42263	2.84058e-05	UCEC	Predicted proliferation inducing lncRNAs
ENSG00000267150	1.2215	4.45212e-06	UCEC	Predicted proliferation inducing lncRNAs
ENSG00000270141	1.61278	7.32223e-05	UCEC	Predicted proliferation inducing lncRNAs
FDR$: False Discovery Rate determined from meta-analysis tool RobustRankAggreg
