# Supplementary material for: Systematic lncRNA mapping to genome-wide co-essential modules uncovers cancer dependency on uncharacterized lncRNAs
Source: eLife. 2022 Jun 13;11:e77357. doi: 10.7554/eLife.77357 (PMC9191893; doi:10.7554/eLife.77357)
Supplement: Figure 3—source data 1. [file elife-77357-fig3-data1.xlsx]

## Sheet: Figure 3-source data 1
Figure 3-source data 1: qRT-PCR for Figure 3F				Mitra et al.
A549										A549										A549										A549										H460
PSLR-1										PSLR-2										BAX										AchR										PSLR-1
Sample	Primer	Ct	Avg Ct	Delta Ct	2(-Delta Ct)	AVG Q	STDEV	SEM		Sample	Primer	Ct	Avg Ct	Delta Ct	2(-Delta Ct)	AVG Q	STDEV	SEM		Sample	Primer	Ct	Avg Ct	Delta Ct	2(-Delta Ct)	AVG Q	STDEV	SEM		Sample	Primer	Ct	Avg Ct	Delta Ct	2(-Delta Ct)	AVG Q	STDEV	SEM		Sample	Primer	Ct	Avg Ct	Delta Ct	2(-Delta Ct)	AVG Q	STDEV	SEM
Untreated	B-ACTIN	13.822	13.7921							Untreated	B-ACTIN	13.822	13.7921							Untreated	B-ACTIN	13.822	13.7921							Untreated	B-ACTIN	13.822	13.7921							Untreated	B-ACTIN	14.3613	14.3815
		13.7986										13.7986										13.7986										13.7986										14.3989
		13.7558										13.7558										13.7558										13.7558										14.3843
	PSLR-1	32.9645	32.9377	19.1723	1.69261e-06	1.72448e-06	3.05985e-08	1.76661e-08			PSLR-2	35.9873	35.9591	22.1952	2.08245e-07	2.12383e-07	3.58616e-09	2.07047e-09			BAX	19.9468	19.9375	6.15465	0.0140368	0.0141284	0.000217495	0.000125571			AchR	33.4246	33.2683	19.6325	1.23035e-06	1.37838e-06	1.75113e-07	1.01102e-07			PSLR-1	24.9354	24.9174	10.5539	0.000665198	0.000673609	7.35638e-06	4.24721e-06
		32.9134		19.1212	1.75362e-06							35.946		22.1538	2.14306e-07							19.9535		6.16135	0.0139717							33.0714		19.2793	1.57168e-06							24.9061		10.5246	0.000678845
		32.9353		19.1431	1.72721e-06							35.944		22.1519	2.14597e-07							19.9123		6.12012	0.0143767							33.3089		19.5168	1.33311e-06							24.9105		10.529	0.000676782
Cisplatin	B-ACTIN	13.5892	13.5625							Cisplatin	B-ACTIN	13.5892	13.5625							Cisplatin	B-ACTIN	13.5892	13.5625							Cisplatin	B-ACTIN	13.5892	13.5625							Cisplatin	B-ACTIN	15.453	15.3779
10uM		13.5613								10uM		13.5613								10uM		13.5613								10uM		13.5613								10uM		15.3628
6hr		13.537								6hr		13.537								6hr		13.537								6hr		13.537								6hr		15.3178
	PSLR-1	32.981	32.9547	19.4185	1.42706e-06	1.45368e-06	4.13339e-08	2.38642e-08			PSLR-2	34.5261	34.55	20.9636	4.89007e-07	4.81132e-07	1.52592e-08	8.80988e-09			BAX	19.2889	19.2475	5.72641	0.0188877	0.0194412	0.000487109	0.000281233			AchR	33.2889	33.2475	19.7264	1.15282e-06	1.1866e-06	2.97308e-08	1.71651e-08			PSLR-1	26.3584	26.3285	10.9805	0.000494918	0.000505367	1.15765e-05	6.68368e-06
		32.9079		19.3454	1.5013e-06							34.6033		21.0408	4.63545e-07							19.2205		5.65801	0.0198047							33.2205		19.658	1.20878e-06							26.334		10.9561	0.000503371
		32.9753		19.4128	1.43269e-06							34.5207		20.9582	4.90846e-07							19.2332		5.67071	0.0196312							33.2332		19.6707	1.19819e-06							26.2931		10.9153	0.000517811
Cisplatin	B-ACTIN	13.7986	13.8526							Cisplatin	B-ACTIN	13.7986	13.8526							Cisplatin	B-ACTIN	13.7986	13.8526							Cisplatin	B-ACTIN	13.7986	13.8526							Cisplatin	B-ACTIN	15.9335	15.9135
10uM		13.9139								10uM		13.9139								10uM		13.9139								10uM		13.9139								10uM		15.9105
12hr		13.8454								12hr		13.8454								12hr		13.8454								12hr		13.8454								12hr		15.8965
	PSLR-1	32.5755	32.4829	18.7229	2.31131e-06	2.47445e-06	2.77556e-07	1.60247e-07			PSLR-2	34.2933	34.2309	20.4407	7.0265e-07	7.34317e-07	3.64451e-08	2.10416e-08			BAX	18.6819	18.6981	4.82928	0.0351755	0.0347919	0.000915733	0.000528699			AchR	33.6819	33.6981	19.8293	1.07347e-06	1.06176e-06	2.7946e-08	1.61346e-08			PSLR-1	25.8002	25.8274	9.8867	0.00105635	0.001037	3.34745e-05	1.93265e-05
		32.5719		18.7192	2.31711e-06							34.2459		20.3932	7.26147e-07							18.7417		4.88911	0.0337467							33.7417		19.8891	1.02987e-06							25.8817		9.96817	0.000998345
		32.3014		18.4488	2.79492e-06							34.1535		20.3009	7.74153e-07							18.6706		4.81793	0.0354534							33.6706		19.8179	1.08195e-06							25.8003		9.88676	0.0010563
Cisplatin	B-ACTIN	14.5089	14.5226							Cisplatin	B-ACTIN	14.5089	14.5226							Cisplatin	B-ACTIN	14.5089	14.5226							Cisplatin	B-ACTIN	14.5089	14.5226							Cisplatin	B-ACTIN	17.0598	17.0992
10uM		14.5098								10uM		14.5098								10uM		14.5098								10uM		14.5098								10uM		17.0351
24hr		14.5492								24hr		14.5492								24hr		14.5492								24hr		14.5492								24hr		17.2027
	PSLR-1	31.0977	31.0822	16.5751	1.02423e-05	1.03566e-05	3.35964e-07	1.93969e-07			PSLR-2	34.1526	34.1468	19.6299	1.23254e-06	1.23751e-06	1.16569e-08	6.73011e-09			BAX	18.4284	18.4106	3.90573	0.0667204	0.0675534	0.00110206	0.000636274			AchR	34.4284	34.4106	19.9057	1.01807e-06	1.03078e-06	1.68161e-08	9.70876e-09			PSLR-1	25.1638	25.2026	8.06461	0.00373518	0.00363873	0.00016855	9.73126e-05
		31.1189		16.5963	1.00927e-05							34.1313		19.6087	1.25083e-06							18.384		3.86138	0.068803							34.384		19.8614	1.04985e-06							25.2808		8.18165	0.00344411
		31.03		16.5073	1.07348e-05							34.1565		19.6339	1.22916e-06							18.4194		3.89675	0.0671367							34.4194		19.8968	1.02443e-06							25.1631		8.06394	0.00373691
Nutlin	B-ACTIN	13.8831	13.8212							Nutlin	B-ACTIN	13.8831	13.8212							Nutlin	B-ACTIN	13.8831	13.8212							Nutlin	B-ACTIN	13.8831	13.8212							Nutlin	B-ACTIN	15.0927	15.0169
10uM		13.7998								10uM		13.7998								10uM		13.7998								10uM		13.7998								10uM		14.9679
6hr		13.7806								6hr		13.7806								6hr		13.7806								6hr		13.7806								6hr		14.99
	PSLR-1	32.1493	32.171	18.3282	3.03862e-06	2.99355e-06	4.70924e-08	2.71888e-08			PSLR-2	33.8195	33.8378	19.9984	9.54758e-07	9.44584e-07	7.14427e-08	4.12474e-08			BAX	18.7335	18.7627	4.91232	0.0332081	0.0325505	0.000936596	0.000540744			AchR	33.7335	33.7627	19.9123	1.01343e-06	9.93361e-07	2.85826e-08	1.65022e-08			PSLR-1	25.1213	25.0286	10.1044	0.000908384	0.000969623	5.33011e-05	3.07734e-05
		32.169		18.3479	2.99736e-06							33.956		20.1348	8.68599e-07							18.7441		4.92291	0.0329652							33.7441		19.9229	1.00602e-06							24.9746		9.95777	0.00100557
		32.1946		18.3735	2.94466e-06							33.7378		19.9167	1.01039e-06							18.8107		4.98951	0.0314781							33.8107		19.9895	9.60635e-07							24.99		9.97314	0.000994914
Nutlin	B-ACTIN	13.9201	13.943							Nutlin	B-ACTIN	13.9201	13.943							Nutlin	B-ACTIN	13.9201	13.943							Nutlin	B-ACTIN	13.9201	13.943							Nutlin	B-ACTIN	15.7318	15.6693
10uM		13.9656								10uM		13.9656								10uM		13.9656								10uM		13.9656								10uM		15.566
12hr		13.9432								12hr		13.9432								12hr		13.9432								12hr		13.9432								12hr		15.71
	PSLR-1	30.7659	30.8949	16.8229	8.626e-06	7.90393e-06	6.25614e-07	3.61198e-07			PSLR-2	33.2319	33.2168	19.2889	1.56118e-06	1.57772e-06	1.72366e-08	9.95156e-09			BAX	18.834	18.7973	4.891	0.0337025	0.0345758	0.000791625	0.000457045			AchR	33.834	33.7973	19.891	1.02852e-06	1.05517e-06	2.41585e-08	1.39479e-08			PSLR-1	24.9059	24.928	9.23663	0.00165767	0.00163264	3.04751e-05	1.75948e-05
		30.9559		17.0129	7.56155e-06							33.2005		19.2575	1.59557e-06							18.7886		4.84566	0.0347785							33.7886		19.8457	1.06136e-06							24.9582		9.28888	0.0015987
		30.963		17.02	7.52423e-06							33.2179		19.2749	1.57639e-06							18.7694		4.82638	0.0352464							33.7694		19.8264	1.07563e-06							24.92		9.25073	0.00164155
Nutlin	B-ACTIN	14.0338	14.0926							Nutlin	B-ACTIN	14.0338	14.0926							Nutlin	B-ACTIN	14.0338	14.0926							Nutlin	B-ACTIN	14.0338	14.0926							Nutlin	B-ACTIN	16.0338	15.9634
10uM		14.1088								10uM		14.1088								10uM		14.1088								10uM		14.1088								10uM		15.9063
24hr		14.1352								24hr		14.1352								24hr		14.1352								24hr		14.1352								24hr		15.95
	PSLR-1	30.0914	30.0714	15.9988	1.52717e-05	1.54868e-05	3.22043e-07	1.85932e-07			PSLR-2	32.8929	32.8299	18.8002	2.19061e-06	2.2895e-06	9.10522e-08	5.2569e-08			BAX	18.9217	18.918	4.82904	0.0351815	0.0352696	8.58862e-05	4.95864e-05			AchR	33.9217	33.918	19.829	1.07365e-06	1.07634e-06	2.62104e-09	1.51326e-09			PSLR-1	25.3922	25.3496	9.42881	0.00145093	0.00149486	4.43913e-05	2.56293e-05
		30.0857		15.9931	1.53317e-05							32.7794		18.6868	2.36986e-06							18.9179		4.82524	0.0352743							33.9179		19.8252	1.07648e-06							25.3065		9.34314	0.00153969
		30.0371		15.9445	1.5857e-05							32.8175		18.7249	2.30803e-06							18.9146		4.82202	0.0353531							33.9146		19.822	1.07889e-06							25.35		9.38665	0.00149395
IR	B-ACTIN	14.9082	14.8058							IR	B-ACTIN	14.9082	14.8058							IR	B-ACTIN	14.9082	14.8058							IR	B-ACTIN	14.9082	14.8058							IR	B-ACTIN	15.4695	15.3454
5Gy		14.8187								5Gy		14.8187								5Gy		14.8187								5Gy		14.8187								5Gy		15.2668
6hr		14.6904								6hr		14.6904								6hr		14.6904								6hr		14.6904								6hr		15.3
	PSLR-1	33.2875	33.3563	18.4817	2.73184e-06	2.61424e-06	2.6921e-07	1.55429e-07			PSLR-2	34.688	34.5533	19.8822	1.0348e-06	1.13851e-06	9.09516e-08	5.25109e-08			BAX	19.2521	19.2556	4.44639	0.0458674	0.0457742	0.00152529	0.000880626			AchR	34.2521	34.2556	19.4464	1.39976e-06	1.39692e-06	4.65481e-08	2.68746e-08			PSLR-1	25.7105	25.6728	10.365	0.00075826	0.000778475	1.78205e-05	1.02887e-05
		33.2495		18.4437	2.80465e-06							34.4687		19.6629	1.2047e-06							19.3054		4.49967	0.0442044							34.3054		19.4997	1.34901e-06							25.6478		10.3024	0.000791911
		33.5318		18.726	2.30624e-06							34.5034		19.6976	1.17603e-06							19.2093		4.40352	0.0472507							34.2093		19.4035	1.44198e-06							25.66		10.3146	0.000785253
IR	B-ACTIN	14.6269	14.5581							IR	B-ACTIN	14.6269	14.5581							IR	B-ACTIN	14.6269	14.5581							IR	B-ACTIN	14.6269	14.5581							IR	B-ACTIN	15.999	16.0106
5Gy		14.5263								5Gy		14.5263								5Gy		14.5263								5Gy		14.5263								5Gy		16.0329
12hr		14.5211								12hr		14.5211								12hr		14.5211								12hr		14.5211								12hr		16
	PSLR-1	32.736	32.7846	18.1779	3.37222e-06	3.26697e-06	2.493e-07	1.43933e-07			PSLR-2	34.9487	34.6825	20.3906	7.27455e-07	8.89511e-07	2.02715e-07	1.17038e-07			BAX	18.9781	18.9555	4.42004	0.0467128	0.0474619	0.00113575	0.000655725			AchR	33.9781	33.9555	19.42	1.42556e-06	1.44842e-06	3.46603e-08	2.00112e-08			PSLR-1	25.7456	25.7465	9.735	0.00117347	0.00117278	5.63879e-06	3.25555e-06
		32.7046		18.1465	3.44639e-06							34.7685		20.2104	8.24263e-07							18.9722		4.41413	0.0469044							33.9722		19.4141	1.43141e-06							25.7538		9.74319	0.00116683
		32.9132		18.3551	2.98231e-06							34.3303		19.7722	1.11682e-06							18.916		4.3579	0.0487687							33.916		19.3579	1.4883e-06							25.74		9.72939	0.00117805
IR	B-ACTIN	14.7761	14.7936							IR	B-ACTIN	14.7761	14.7936							IR	B-ACTIN	14.7761	14.7936							IR	B-ACTIN	14.7761	14.7936							IR	B-ACTIN	16.3304	16.3856
5Gy		14.8177								5Gy		14.8177								5Gy		14.8177								5Gy		14.8177								5Gy		16.4565
24hr		14.7871								24hr		14.7871								24hr		14.7871								24hr		14.7871								24hr		16.37
	PSLR-1	31.8002	31.5424	17.0065	7.59487e-06	9.15177e-06	1.35352e-06	7.81454e-07			PSLR-2	33.9483	34.0014	19.1547	1.71345e-06	1.65209e-06	5.4779e-08	3.16267e-08			BAX	19.1725	19.1472	4.37889	0.0480642	0.0489241	0.00112838	0.000651471			AchR	34.1725	34.1472	19.3789	1.4668e-06	1.49304e-06	3.44355e-08	1.98813e-08			PSLR-1	25.4058	25.4343	9.02021	0.00192595	0.00188864	4.02268e-05	2.3225e-05
		31.3963		16.6026	1.00487e-05							34.0162		19.2225	1.63469e-06							19.1097		4.31612	0.0502018							34.1097		19.3161	1.53204e-06							25.467		9.08136	0.00184603
		31.4307		16.6371	9.81174e-06							34.0398		19.2462	1.60812e-06							19.1593		4.36568	0.0485063							34.1593		19.3657	1.48029e-06							25.43		9.04439	0.00189395
Etoposide	B-ACTIN	13.5892	13.5625							Etoposide	B-ACTIN	13.5892	13.5625							Etoposide	B-ACTIN	13.5892	13.5625							Etoposide	B-ACTIN	13.5892	13.5625							Etoposide	B-ACTIN	14.9164	14.8609
10uM		13.5613								10uM		13.5613								10uM		13.5613								10uM		13.5613								10uM		14.8787
6hr		13.537								6hr		13.537								6hr		13.537								6hr		13.537								6hr		14.7875
	PSLR-1	32.977	32.9431	19.4145	1.43106e-06	1.46528e-06	3.15851e-08	1.82356e-08			PSLR-2	34.4621	34.7236	20.8996	5.1121e-07	4.31153e-07	7.80272e-08	4.5049e-08			BAX	19.6916	19.6988	6.12907	0.0142879	0.014216	6.89688e-05	3.98192e-05			AchR	33.8415	33.8879	20.279	7.85974e-07	7.61278e-07	2.13944e-08	1.2352e-08			PSLR-1	24.5006	24.4857	9.63973	0.00125358	0.00126676	2.26333e-05	1.30673e-05
		32.9156		19.3531	1.4933e-06							34.9868		21.4243	3.55328e-07							19.6995		6.13698	0.0142097							33.9122		20.3497	7.48398e-07							24.456		9.59517	0.0012929
		32.9368		19.3743	1.47149e-06							34.722		21.1595	4.26922e-07							19.7055		6.14302	0.0141503							33.9101		20.3476	7.49461e-07							24.5003		9.63946	0.00125381
Etoposide	B-ACTIN	13.7986	13.8526							Etoposide	B-ACTIN	13.7986	13.8526							Etoposide	B-ACTIN	13.7986	13.8526							Etoposide	B-ACTIN	13.7986	13.8526							Etoposide	B-ACTIN	16.5397	16.4732
10uM		13.9139								10uM		13.9139								10uM		13.9139								10uM		13.9139								10uM		16.4525
12hr		13.8454								12hr		13.8454								12hr		13.8454								12hr		13.8454								12hr		16.4275
	PSLR-1	31.7857	31.5017	17.9331	3.99582e-06	4.9252e-06	9.38075e-07	5.41598e-07			PSLR-2	34.5074	34.4968	20.6548	6.05759e-07	6.20095e-07	1.35928e-07	7.8478e-08			BAX	18.1296	18.18	4.27695	0.0515836	0.0498288	0.0016065	0.000927511			AchR	33.8155	33.8138	19.9629	9.78538e-07	9.79688e-07	1.4237e-09	8.21974e-10			PSLR-1	24.8867	24.8788	8.41346	0.0029329	0.00294943	6.65105e-05	3.83999e-05
		31.4891		17.6364	4.90804e-06							34.1752		20.3225	7.62623e-07							18.1899		4.33723	0.0494724							33.8145		19.9618	9.79246e-07							24.8432		8.36997	0.00302265
		31.2304		17.3778	5.87173e-06							34.8078		20.9551	4.91903e-07							18.2206		4.36794	0.0484304							33.8115		19.9588	9.8128e-07							24.9065		8.43334	0.00289275
Etoposide	B-ACTIN	14.5089	14.5226							Etoposide	B-ACTIN	14.5089	14.5226							Etoposide	B-ACTIN	14.5089	14.5226							Etoposide	B-ACTIN	14.5089	14.5226							Etoposide	B-ACTIN	16.0967	16.1679
10uM		14.5098								10uM		14.5098								10uM		14.5098								10uM		14.5098								10uM		16.0649
24hr		14.5492								24hr		14.5492								24hr		14.5492								24hr		14.5492								24hr		16.342
	PSLR-1	30.7662	30.7829	16.2435	1.28886e-05	1.28032e-05	1.54487e-06	8.91932e-07			PSLR-2	34.8181	34.7512	20.2955	7.77039e-07	8.15843e-07	6.98037e-08	4.03012e-08			BAX	18.9552	18.939	4.43259	0.0463082	0.0468338	0.000567771	0.000327803			AchR	34.3744	34.4462	19.8517	1.0569e-06	1.00623e-06	4.43106e-08	2.55827e-08			PSLR-1	24.6237	24.5661	8.45584	0.00284799	0.00296541	0.000112778	6.51125e-05
		30.6159		16.0933	1.43036e-05							34.8237		20.301	7.74063e-07							18.9205		4.39787	0.047436							34.4911		19.9685	9.74723e-07							24.5141		8.34619	0.00307289
		30.9665		16.4439	1.12174e-05							34.6119		20.0893	8.96427e-07							18.9413		4.41867	0.0467573							34.473		19.9503	9.87071e-07							24.5606		8.39273	0.00297534
Raw Values			Rel to Untreated							Raw Values			Rel to Untreated							Raw Values			Rel to Untreated							Raw Values			Rel to Untreated							Raw Values			Rel to Untreated
AVG Q	SEM		AVG Q	SEM						AVG Q	SEM		AVG Q	SEM						AVG Q	SEM		AVG Q	SEM						AVG Q	SEM		AVG Q	SEM						AVG Q	SEM		AVG Q	SEM
1.72448e-06	1.76661e-08		1	0.0102443		p-values (2-tailed t-tests)				2.12383e-07	2.07047e-09		1	0.00974876		p-values (2-tailed t-tests)				0.0141284	0.000125571		1	0.00888782		p-values (2-tailed t-tests)				1.37838e-06	1.01102e-07		1	0.0733483						0.000673609	4.24721e-06		1	0.00630516		p-values (2-tailed t-tests)
1.45368e-06	2.38642e-08		0.842969	0.0138385		0.000801822				4.81132e-07	8.80988e-09		2.2654	0.0414812		7.65704e-06				0.0194412	0.000281233		1.37604	0.0199055		6.62747e-05				1.1866e-06	1.71651e-08		0.860864	0.0124531						0.000505367	6.68368e-06		0.750238	0.00992219		2.90205e-05
2.47445e-06	1.60247e-07		1.4349	0.0929248		0.0096477				7.34317e-07	2.10416e-08		3.45752	0.099074		1.59822e-05				0.0347919	0.000528699		2.46255	0.037421		2.85651e-06				1.06176e-06	1.61346e-08		0.770299	0.0117055						0.001037	1.93265e-05		1.53947	0.028691		5.17259e-05
1.03566e-05	1.93969e-07		6.00566	0.11248		1.5499e-06				1.23751e-06	6.73011e-09		5.82679	0.0316886		1.33517e-08				0.0675534	0.000636274		4.78139	0.0450351		1.3017e-07				1.03078e-06	9.70876e-09		0.747823	0.00704361						0.00363873	9.73126e-05		5.40185	0.144465		6.9373e-06
2.99355e-06	2.71888e-08		1.73591	0.0157664		2.54562e-06				9.44584e-07	4.12474e-08		4.44756	0.194213		5.94631e-05				0.0325505	0.000540744		2.3039	0.0382736		4.91767e-06				9.93361e-07	1.65022e-08		0.720674	0.0119722						0.000969623	3.07734e-05		1.43945	0.0456844		0.000677265
7.90393e-06	3.61198e-07		4.58337	0.209454		6.87954e-05				1.57772e-06	9.95156e-09		7.42864	0.0468567		1.84251e-08				0.0345758	0.000457045		2.44726	0.0323494		1.72618e-06				1.05517e-06	1.39479e-08		0.765515	0.0101191						0.00163264	1.75948e-05		2.42372	0.0261202		7.59487e-07
1.54868e-05	1.85932e-07		8.98057	0.107819		2.03269e-07				2.2895e-06	5.2569e-08		10.7801	0.24752		2.45877e-06				0.0352696	4.95864e-05		2.49636	0.0035097		9.9755e-09				1.07634e-06	1.51326e-09		0.780876	0.00109785						0.00149486	2.56293e-05		2.21918	0.0380478		5.96815e-06
2.61424e-06	1.55429e-07		1.51596	0.0901308		0.00471785				1.13851e-06	5.25109e-08		5.36067	0.247247		6.08901e-05				0.0457742	0.000880626		3.23987	0.0623302		3.72609e-06				1.39692e-06	2.68746e-08		1.01345	0.0194972						0.000778475	1.02887e-05		1.15568	0.015274		0.000707598
3.26697e-06	1.43933e-07		1.89447	0.0834649		0.000442311				8.89511e-07	1.17038e-07		4.18825	0.551069		0.00443727				0.0474619	0.000655725		3.35933	0.0464119		9.63019e-07				1.44842e-06	2.00112e-08		1.05082	0.0145179						0.00117278	3.25555e-06		1.74105	0.00483301		7.91902e-08
9.15177e-06	7.81454e-07		5.30698	0.453154		0.00068467				1.65209e-06	3.16267e-08		7.77883	0.148914		1.4047e-06				0.0489241	0.000651471		3.46282	0.0461108		7.91161e-07				1.49304e-06	1.98813e-08		1.08319	0.0144237						0.00188864	2.3225e-05		2.80377	0.0344784		8.53289e-07
1.46528e-06	1.82356e-08		5.26224	0.0654892		6.64898e-06				4.31153e-07	4.5049e-08		1.68074	0.175612		0.0280672				0.014216	3.98192e-05		1.06495	0.00298293		0.00638612				7.61278e-07	1.2352e-08		0.552299	0.00896128						0.00126676	1.30673e-05		1.88056	0.019399		1.72147e-06
4.9252e-06	5.41598e-07		17.6877	1.94503		0.00102138				6.20095e-07	7.8478e-08		2.41728	0.305927		0.011657				0.0498288	0.000927511		3.73277	0.0694816		2.64884e-06				9.79688e-07	8.21974e-10		0.710754	0.000596334						0.00294943	3.83999e-05		4.37856	0.0570062		4.97327e-07
1.28032e-05	8.91932e-07		45.9798	3.20317		0.000149657				8.15843e-07	4.03012e-08		3.18036	0.157104		0.000304144				0.0468338	0.000327803		3.50841	0.0245563		8.48054e-08				1.00623e-06	2.55827e-08		0.73001	0.01856						0.00296541	6.51125e-05		4.40227	0.0966622		3.92145e-06
[truncated: 27 more columns]
