# Supplementary material for: Systematic lncRNA mapping to genome-wide co-essential modules uncovers cancer dependency on uncharacterized lncRNAs
Source: eLife. 2022 Jun 13;11:e77357. doi: 10.7554/eLife.77357 (PMC9191893; doi:10.7554/eLife.77357)
Supplement: Figure 4—source data 1. [file elife-77357-fig4-data1.xlsx]

## Sheet: Figure 4-source data 1
Figure 4-source data 1: qRT-PCR for Figure 4A					Mitra et al.
PSLR-1										PSLR-2
Sample	Primer	Ct	Avg Ct	Delta Ct	2(-Delta Ct)	AVG Q	STDEV	SEM		Sample	Primer	Ct	Avg Ct	Delta Ct	2(-Delta Ct)	AVG Q	STDEV	SEM
N1	B-ACTIN	18.47	18.4633							N1	B-ACTIN	18.47	18.4633
		18.44										18.44
		18.48										18.48
	PSLR-1	27.26	27.2367	8.79667	0.00224874	0.00228564	3.99366e-05	2.30574e-05			PSLR-2	28.59	28.5067	10.1267	0.000894478	0.000948766	5.60034e-05	3.23336e-05
		27.24		8.77667	0.00228013							28.51		10.0467	0.000945479
		27.21		8.74667	0.00232804							28.42		9.95667	0.00100634
N2	B-ACTIN	18.51	18.51							N2	B-ACTIN	18.51	18.51
		18.53										18.53
		18.49										18.49
	PSLR-1	27.55	27.53	9.04	0.00189972	0.00192636	2.67044e-05	1.54178e-05			PSLR-2	28.71	28.7467	10.2	0.000850147	0.00082895	1.85748e-05	1.07242e-05
		27.51		9	0.00195312							28.77		10.26	0.000815516
		27.53		9.02	0.00192624							28.76		10.25	0.000821188
N3	B-ACTIN	18.44	18.4333							N3	B-ACTIN	18.44	18.4333
		18.44										18.44
		18.42										18.42
	PSLR-1	27.55	27.53	9.11667	0.0018014	0.0018269	4.4166e-05	2.54993e-05			PSLR-2	28.17	28.1467	9.73667	0.00117212	0.00119143	2.66971e-05	1.54136e-05
		27.55		9.11667	0.0018014							28.16		9.72667	0.00118027
		27.49		9.05667	0.0018779							28.11		9.67667	0.00122189
N4	B-ACTIN	18.37	18.36							N4	B-ACTIN	18.37	18.36
		18.35										18.35
		18.36										18.36
	PSLR-1	26.99	26.95	8.63	0.00252413	0.00259575	7.19627e-05	4.15477e-05			PSLR-2	28.61	28.6333	10.25	0.000821188	0.000808095	1.40717e-05	8.12431e-06
		26.95		8.59	0.00259509							28.66		10.3	0.000793215
		26.91		8.55	0.00266805							28.63		10.27	0.000809882
N5	B-ACTIN	18.41	18.4133							N5	B-ACTIN	18.41	18.4133
		18.42										18.42
		18.41										18.41
	PSLR-1	27.11	27.0933	8.69667	0.00241014	0.00243824	2.5773e-05	1.48801e-05			PSLR-2	28.44	28.4067	10.0267	0.000958678	0.00098128	2.3926e-05	1.38137e-05
		27.08		8.66667	0.00246078							28.41		9.99667	0.000978821
		27.09		8.67667	0.00244379							28.37		9.95667	0.00100634
LUAD-1	B-ACTIN	18.43	18.45							LUAD-1	B-ACTIN	18.43	18.45
		18.45										18.45
		18.47										18.47
	PSLR-1	29.11	29.0667	10.66	0.000618045	0.000637057	1.7784e-05	1.02676e-05			PSLR-2	30.11	30.0933	11.66	0.000309023	0.000312836	1.45509e-05	8.40094e-06
		29.03		10.58	0.000653285							30.02		11.57	0.000328914
		29.06		10.61	0.000639841							30.15		11.7	0.000300572
LUAD-2	B-ACTIN	18.33	18.3133							LUAD-2	B-ACTIN	18.33	18.3133
		18.32										18.32
		18.29										18.29
	PSLR-1	28.77	28.7467	10.4567	0.00071159	0.000723312	1.62077e-05	9.35754e-06			PSLR-2	30.77	30.7633	12.4567	0.000177897	0.000178734	2.58689e-06	1.49354e-06
		28.71		10.3967	0.000741808							30.78		12.4667	0.000176669
		28.76		10.4467	0.000716539							30.74		12.4267	0.000181635
LUAD-3	B-ACTIN	18.31	18.2967							LUAD-3	B-ACTIN	18.31	18.2967
		18.3										18.3
		18.28										18.28
	PSLR-1	29.66	29.6467	11.3633	0.000379573	0.000383106	3.05918e-06	1.76622e-06			PSLR-2	29.99	29.9667	11.6933	0.000301965	0.000306939	6.87779e-06	3.97089e-06
		29.64		11.3433	0.000384872							29.98		11.6833	0.000304065
		29.64		11.3433	0.000384872							29.93		11.6333	0.000314788
LUAD-4	B-ACTIN	18.27	18.2833							LUAD-4	B-ACTIN	18.27	18.2833
		18.27										18.27
		18.31										18.31
	PSLR-1	28.76	28.7333	10.4767	0.000701793	0.000714958	1.24499e-05	7.18794e-06			PSLR-2	30.22	30.2167	11.9367	0.000255097	0.000255688	1.02442e-06	5.91447e-07
		28.73		10.4467	0.000716539							30.21		11.9267	0.000256871
		28.71		10.4267	0.000726542							30.22		11.9367	0.000255097
LUAD-5	B-ACTIN	18.47	18.4733							LUAD-5	B-ACTIN	18.47	18.4733
		18.46										18.46
		18.49										18.49
	PSLR-1	29.59	29.53	11.1167	0.00045035	0.000469745	1.95319e-05	1.12768e-05			PSLR-2	30.69	30.7	12.2167	0.000210096	0.000208648	1.44623e-06	8.34979e-07
		29.47		10.9967	0.000489411							30.71		12.2367	0.000207203
		29.53		11.0567	0.000469474							30.7		12.2267	0.000208644
LUAD-6	B-ACTIN	18.44	18.4333							LUAD-6	B-ACTIN	18.44	18.4333
		18.41										18.41
		18.45										18.45
	PSLR-1	30.55	30.5267	12.1167	0.000225175	0.000228862	3.29188e-06	1.90057e-06			PSLR-2	31.51	31.6	13.0767	0.000115753	0.00010887	6.23442e-06	3.59944e-06
		30.51		12.0767	0.000231505							31.62		13.1867	0.000107255
		30.52		12.0867	0.000229906							31.67		13.2367	0.000103602
LUAD-7	B-ACTIN	18.52	18.53							LUAD-7	B-ACTIN	18.52	18.53
		18.51										18.51
		18.56										18.56
	PSLR-1	29.88	29.8533	11.35	0.000383098	0.000390335	1.03136e-05	5.95457e-06			PSLR-2	29.88	29.78	11.35	0.000383098	0.000411191	2.7034e-05	1.56081e-05
		29.87		11.34	0.000385762							29.69		11.16	0.000437024
		29.81		11.28	0.000402144							29.77		11.24	0.00041345
LUAD-8	B-ACTIN	18.49	18.4933							LUAD-8	B-ACTIN	18.49	18.4933
		18.51										18.51
		18.48										18.48
	PSLR-1	29.35	29.3433	10.8567	0.000539284	0.000541794	4.34637e-06	2.50938e-06			PSLR-2	30.77	30.7333	12.2767	0.000201537	0.000206779	5.81147e-06	3.35525e-06
		29.33		10.8367	0.000546812							30.74		12.2467	0.000205772
		29.35		10.8567	0.000539284							30.69		12.1967	0.000213028
LUAD-9	B-ACTIN	18.47	18.4567							LUAD-9	B-ACTIN	18.47	18.4567
		18.46										18.46
		18.44										18.44
	PSLR-1	31.22	31.2167	12.7633	0.000143831	0.00014417	1.52896e-06	8.82747e-07			PSLR-2	30.33	30.38	11.8733	0.000266545	0.000257544	7.84403e-06	4.52875e-06
		31.23		12.7733	0.000142838							30.4		11.9433	0.000253921
		31.2		12.7433	0.000145839							30.41		11.9533	0.000252167
LUAD-10	B-ACTIN	18.39	18.3567							LUAD-10	B-ACTIN	18.39	18.3567
		18.33										18.33
		18.35										18.35
	PSLR-1	29.97	29.9833	11.6133	0.000319182	0.000316298	7.00662e-06	4.04527e-06			PSLR-2	30.55	30.54	12.1933	0.000213521	0.00021503	3.9608e-06	2.28677e-06
		29.96		11.6033	0.000321402							30.51		12.1533	0.000219524
		30.02		11.6633	0.000308309							30.56		12.2033	0.000212046
