# Supplementary material for: Systematic lncRNA mapping to genome-wide co-essential modules uncovers cancer dependency on uncharacterized lncRNAs
Source: eLife. 2022 Jun 13;11:e77357. doi: 10.7554/eLife.77357 (PMC9191893; doi:10.7554/eLife.77357)
Supplement: Figure 5—source data 1. [file elife-77357-fig5-data1.xlsx]

## Sheet: Figure 5-source data 1
Figure 5-source data 1: MTT for Figure 5A					Mitra et al.
A549									H460
Time (hr)	Cells					AVG	STDEV		Time (hr)	Cells					AVG	STDEV
0	MALAT1	0.185	0.19	0.186	0.183	0.186	0.00294392		0	MALAT1	0.209	0.213	0.205	0.207	0.2085	0.00341565
24		0.353	0.36	0.33	0.359	0.3505	0.0140119		24		0.417	0.413	0.419	0.413	0.4155	0.003
48		0.567	0.588	0.56	0.569	0.571	0.0119722		48		0.731	0.731	0.699	0.693	0.7135	0.0203552
72		0.781	0.778	0.791	0.799	0.78725	0.00960469		72		0.922	0.931	0.917	0.925	0.92375	0.00585235
96		1.121	1.132	1.114	1.123	1.1225	0.0074162		96		1.345	1.255	1.333	1.347	1.32	0.0437721
0	VECTOR	0.193	0.184	0.192	0.181	0.1875	0.00591608		0	VECTOR	0.217	0.227	0.221	0.215	0.22	0.0052915
24		0.288	0.276	0.281	0.269	0.2785	0.00802081		24		0.354	0.348	0.334	0.328	0.341	0.0120554
48		0.432	0.441	0.428	0.425	0.4315	0.00695222		48		0.507	0.487	0.485	0.509	0.497	0.0127541
72		0.611	0.62	0.61	0.606	0.61175	0.00590903		72		0.735	0.743	0.729	0.77	0.74425	0.0180993
96		0.865	0.857	0.859	0.844	0.85625	0.0088459		96		1.069	1.034	1.032	1.042	1.04425	0.0170563
0	PSLR-1	0.179	0.167	0.195	0.166	0.17675	0.0135247		0	PSLR-1	0.203	0.19	0.214	0.19	0.19925	0.0115866
24		0.201	0.199	0.191	0.197	0.197	0.00432049		24		0.245	0.242	0.241	0.241	0.24225	0.00189297
48		0.259	0.264	0.233	0.251	0.25175	0.0135984		48		0.313	0.317	0.322	0.315	0.31675	0.00386221
72		0.366	0.374	0.381	0.369	0.3725	0.00655744		72		0.431	0.422	0.434	0.421	0.427	0.00648074
96		0.457	0.475	0.481	0.468	0.47025	0.0103078		96		0.522	0.534	0.551	0.512	0.52975	0.0167804
0	PSLR-2	0.19	0.18	0.2	0.17	0.185	0.0129099		0	PSLR-2	0.214	0.203	0.219	0.194	0.2075	0.0112101
24		0.216	0.211	0.237	0.203	0.21675	0.014523		24		0.24	0.234	0.256	0.227	0.23925	0.0123659
48		0.256	0.262	0.255	0.244	0.25425	0.0075		48		0.28	0.285	0.274	0.268	0.27675	0.00736546
72		0.381	0.391	0.387	0.396	0.38875	0.00634429		72		0.358	0.374	0.369	0.351	0.363	0.0104243
96		0.567	0.549	0.535	0.549	0.55	0.0131149		96		0.567	0.584	0.591	0.599	0.58525	0.0136229
p-values (2-tailed t-tests)									p-values (2-tailed t-tests)
VECTOR vs MALAT1			0.000110767						VECTOR vs MALAT1			2.03684e-05
VECTOR vs PSLR-1			1.95991e-06						VECTOR vs PSLR-1			3.53919e-06
VECTOR vs PSLR-2			0.000302781						VECTOR vs PSLR-2			2.25634e-05
