# Supplementary material for: Systematic lncRNA mapping to genome-wide co-essential modules uncovers cancer dependency on uncharacterized lncRNAs
Source: eLife. 2022 Jun 13;11:e77357. doi: 10.7554/eLife.77357 (PMC9191893; doi:10.7554/eLife.77357)
Supplement: Figure 5—source data 2. [file elife-77357-fig5-data2.xlsx]

## Sheet: Figure 5-source data 2
Figure 5-source data 2: Colony Number for Figure 5B							Mitra et al.
A549				AVG	STDEV	SEM		p-values (2-tailed t-tests)
VECTOR	111	113	105	109.667	4.16333	2.4037
MALAT1	128	120	131	126.333	5.68624	3.28295		VECTOR vs MALAT1			0.0148998
PSLR-1	39	46	46	43.6667	4.04145	2.33333		VECTOR vs PSLR-1			3.91481e-05
PSLR-2	60	60	50	56.6667	5.7735	3.33333		VECTOR vs PSLR-2			0.000208468
H460
VECTOR	137	156	148	147	9.53939	5.50757
MALAT1	170	175	201	182	16.6433	9.60902		VECTOR vs MALAT1			0.0341798
PSLR-1	53	68	56	59	7.93725	4.58258		VECTOR vs PSLR-1			0.000252387
PSLR-2	82	76	74	77.3333	4.16333	2.4037		VECTOR vs PSLR-2			0.000316295
