# Supplementary material for: Systematic lncRNA mapping to genome-wide co-essential modules uncovers cancer dependency on uncharacterized lncRNAs
Source: eLife. 2022 Jun 13;11:e77357. doi: 10.7554/eLife.77357 (PMC9191893; doi:10.7554/eLife.77357)
Supplement: Figure 5—source data 3. [file elife-77357-fig5-data3.xlsx]

## Sheet: Figure 5-source data 3
Figure 5-source data 3: Live Cell Number for Figure 5C							Mitra et al.
A549
VECTOR	MALAT1	PSLR-1	PSLR-2		p-values (2-tailed t-tests)
210000	250000	125000	150000		MALAT1 vs VECTOR			0.000576521
220000	280000	130000	140000		PSLR-1 vs VECTOR			5.1551e-06
205000	275000	120000	135000		PSLR-2 vs VECTOR			2.67886e-05
200000	255000	135000	150000
H460
VECTOR	MALAT1	PSLR-1	PSLR-2		p-values (2-tailed t-tests)
280000	335000	160000	220000		MALAT1 vs VECTOR			2.9038e-05
275000	330000	155000	205000		PSLR-1 vs VECTOR			4.86115e-08
283000	325000	165000	205000		PSLR-2 vs VECTOR			3.28478e-06
287000	320000	153000	210000
