# Supplementary material for: Systematic lncRNA mapping to genome-wide co-essential modules uncovers cancer dependency on uncharacterized lncRNAs
Source: eLife. 2022 Jun 13;11:e77357. doi: 10.7554/eLife.77357 (PMC9191893; doi:10.7554/eLife.77357)
Supplement: Figure 5—source data 4. [file elife-77357-fig5-data4.xlsx]

## Sheet: Figure 5-source data 4
Figure 5-source data 4: Cell Cycle for Figure 5D							Mitra et al.
A549
	G1				S				G2M
VECTOR	58	72.8	57.9	47.4	15.5	17.8	18.1	22.3	26.9	9.91	22.8	27.9
MALAT1	53.6	65.5	51.4	38.3	23	23.7	25.5	26.8	26.1	8.59	23.2	32.9
PSLR-1	26.8	31.7	33	20.9	6.5	7.26	7.27	5.83	64.1	60.5	59.1	72
PSLR-2	32.7	36	27.9	36.9	11.1	11.6	6.45	17.6	53.9	50.8	62.6	44.1
p-values (2-tailed t-tests)
MALAT1 vs VECTOR for S			0.00881956
PSLR-1 vs VECTOR for G2M			0.000162568
PSLR-2 vs VECTOR for G2M			0.00153485
H460
	G1				S				G2M
VECTOR	63.2	72.3	65.5	51.1	19.9	17.8	22.1	24.4	16.3	9.19	11.7	23
MALAT1	49.9	57.5	52.3	44.9	36.5	30.5	30.7	28	13.5	10.3	15.7	25.2
PSLR-1	27	27.9	46.2	11.6	5.72	5.93	12.2	8.15	67.1	65.4	40.8	78.6
PSLR-2	38.8	41.1	28.5	46.9	9.94	12.8	6.56	6.2	52.1	45.8	64.4	46.1
p-values (2-tailed t-tests)
MALAT1 vs VECTOR for S			0.00399529
PSLR-1 vs VECTOR for G2M			0.00134121
PSLR-2 vs VECTOR for G2M			0.000427216
