# Supplementary material for: Systematic lncRNA mapping to genome-wide co-essential modules uncovers cancer dependency on uncharacterized lncRNAs
Source: eLife. 2022 Jun 13;11:e77357. doi: 10.7554/eLife.77357 (PMC9191893; doi:10.7554/eLife.77357)
Supplement: Figure 6—source data 1. [file elife-77357-fig6-data1.xlsx]

## Sheet: Figure 6B
Figure 6-source data 1: qRT-PCR for Figure 6B							Mitra et al.
CDKN1A										GADD45A										SFN/14-3-3-sigma										CDK1										CCNA2
Sample	Primer	Ct	Avg Ct	Delta Ct	2(-Delta Ct)	AVG Q	STDEV	SEM		Sample	Primer	Ct	Avg Ct	Delta Ct	2(-Delta Ct)	AVG Q	STDEV	SEM		Sample	Primer	Ct	Avg Ct	Delta Ct	2(-Delta Ct)	AVG Q	STDEV	SEM		Sample	Primer	Ct	Avg Ct	Delta Ct	2(-Delta Ct)	AVG Q	STDEV	SEM		Sample	Primer	Ct	Avg Ct	Delta Ct	2(-Delta Ct)	AVG Q	STDEV	SEM
A549	B-ACTIN	16.6229	16.4035							A549	B-ACTIN	16.6229	16.4035							A549	B-ACTIN	16.6229	16.4035							A549	B-ACTIN	16.6229	16.4035							A549	B-ACTIN	16.6229	16.4035
		16.3026										16.3026										16.3026										16.3026										16.3026
Vector		16.2851								Vector		16.2851								Vector		16.2851								Vector		16.2851								Vector		16.2851
	CDKN1A	24.1325	24.1258	7.72894	0.00471365	0.00473573	6.42217e-05	3.70784e-05			GADD45A	26.2985	26.2005	9.89495	0.00105032	0.00112927	0.000135115	7.80084e-05			14-3-3-σ	26.9307	26.9355	10.5272	0.000677639	0.000675429	5.30202e-06	3.06113e-06			CDK1	20.9609	20.6947	4.55734	0.0424722	0.0517779	0.0105877	0.00611284			CCNA2	23.7284	23.7284	7.32483	0.00623744	0.00624416	0.000354721	0.000204798
		24.1039		7.70032	0.00480808							26.2959		9.89238	0.0010522							26.9484		10.5449	0.00066938							20.7381		4.33456	0.049564							23.8104		7.40682	0.00589285
		24.1411		7.73759	0.00468546							26.0072		9.6037	0.00128528							26.9273		10.5237	0.000679269							20.3852		3.98171	0.0632976							23.6464		7.24284	0.00660219
A549	B-ACTIN	16.6227	16.5605							A549	B-ACTIN	16.6227	16.5605							A549	B-ACTIN	16.6227	16.5605							A549	B-ACTIN	16.6227	16.5605							A549	B-ACTIN	16.6227	16.5605
		16.4918										16.4918										16.4918										16.4918										16.4918
PSLR-1		16.5669								PSLR-1		16.5669								PSLR-1		16.5669								PSLR-1		16.5669								PSLR-1		16.5669
	CDKN1A	19.037	18.963	2.47652	0.179678	0.189256	0.00838793	0.00484277			GADD45A	21.0378	21.2614	4.47734	0.0448937	0.0389794	0.00759621	0.00438568			14-3-3-σ	21.6283	21.4546	5.06779	0.0298155	0.0337715	0.00377955	0.00218212			CDK1	23.3728	23.1615	6.81239	0.00889749	0.0103562	0.00127448	0.000735823			CCNA2	26.6418	26.8126	10.0813	0.000923052	0.00082291	8.69841e-05	5.02203e-05
		18.9353		2.37484	0.192798							21.5996		5.03919	0.0304126							21.3034		4.74292	0.0373455							23.0338		6.47338	0.0112543							26.8855		10.3251	0.000779547
		18.9168		2.3563	0.195291							21.1466		4.58617	0.0416318							21.4323		4.87182	0.0341536							23.0778		6.51731	0.0109167							26.9106		10.3501	0.000766132
A549	B-ACTIN	16.3417	16.1354							A549	B-ACTIN	16.3417	16.1354							A549	B-ACTIN	16.3417	16.1354							A549	B-ACTIN	16.3417	16.1354							A549	B-ACTIN	16.3417	16.1354
		16.0187										16.0187										16.0187										16.0187										16.0187
PSLR-2		16.0457								PSLR-2		16.0457								PSLR-2		16.0457								PSLR-2		16.0457								PSLR-2		16.0457
	CDKN1A	18.2895	18.1598	2.1541	0.224673	0.246299	0.0187533	0.0108272			GADD45A	22.8656	22.876	6.73024	0.00941877	0.00935648	0.000373609	0.000215703			14-3-3-σ	20.7303	20.7938	4.59495	0.0413793	0.0396387	0.00215438	0.00124383			CDK1	25.3079	25.5621	9.17249	0.00173303	0.00146612	0.000243796	0.000140755			CCNA2	28.3944	28.2724	12.259	0.000204014	0.000222443	1.65363e-05	9.54722e-06
		18.0895		1.95416	0.25807							22.9384		6.80299	0.00895564							20.7682		4.63281	0.0403075							25.7733		9.63791	0.00125516							28.1844		12.049	0.000235985
		18.1003		1.96492	0.256154							22.8239		6.68854	0.00969503							20.8828		4.74742	0.0372292							25.6053		9.46991	0.00141018							28.2383		12.1029	0.000227329
H460	B-ACTIN	15.7716	15.7149							H460	B-ACTIN	15.7716	15.7149							H460	B-ACTIN	15.7716	15.7149							H460	B-ACTIN	15.7716	15.7149							H460	B-ACTIN	15.7716	15.7149
		15.6629										15.6629										15.6629								48hr		15.6629										15.6629
Vector		15.7102								Vector		15.7102								Vector		15.7102								Vector		15.7102								Vector		15.7102
	CDKN1A	23.6392	23.6731	7.92428	0.00411675	0.00402188	9.97479e-05	5.75895e-05			GADD45A	25.7088	25.8691	9.99394	0.000980673	0.000880416	8.86091e-05	5.11585e-05			14-3-3-σ	22.0828	21.9493	6.36795	0.0121076	0.0133101	0.00104738	0.000604707			CDK1	19.4089	19.2718	3.69404	0.0772649	0.0851736	0.007195	0.00415404			CCNA2	21.9054	22.0397	6.19052	0.013692	0.0125021	0.00103059	0.000595013
		23.7106		7.99571	0.00391788							25.9801		10.2652	0.000812596							21.871		6.15608	0.0140228							19.1676		3.45274	0.0913318							22.1047		6.38984	0.0119252
		23.6695		7.95464	0.004031							25.9186		10.2037	0.00084798							21.8941		6.17919	0.0138							19.239		3.5241	0.0869243							22.1091		6.3942	0.0118892
H460	B-ACTIN	17.87	17.8223							H460	B-ACTIN	17.87	17.8223							H460	B-ACTIN	17.87	17.8223							H460	B-ACTIN	17.87	17.8223							H460	B-ACTIN	17.87	17.8223
		17.8029										17.8029										17.8029										17.8029										17.8029
PSLR-1		17.794								PSLR-1		17.794								PSLR-1		17.794								PSLR-1		17.794								PSLR-1		17.794
	CDKN1A	18.3955	18.59	0.573184	0.672132	0.59336	0.100522	0.0580363			GADD45A	20.2074	20.2526	2.38512	0.191429	0.185631	0.00754232	0.00435456			14-3-3-σ	21.8766	21.8504	4.05431	0.0601909	0.0613054	0.00139827	0.000807293			CDK1	22.7684	22.7789	4.94608	0.03244	0.0322069	0.00043542	0.00025139			CCNA2	26.9117	27.019	9.08945	0.00183571	0.00170657	0.000111863	6.45839e-05
		18.8807		1.05846	0.480144							20.2307		2.40842	0.188362							21.8609		4.03858	0.060851							22.7668		4.94447	0.0324762							27.0704		9.24809	0.00164455
		18.4939		0.671613	0.627804							20.3196		2.49733	0.177104							21.8137		3.99138	0.0628744							22.8015		4.97917	0.0317046							27.0749		9.25256	0.00163946
H460	B-ACTIN	17.9107	17.7532							H460	B-ACTIN	17.9107	17.7532							H460	B-ACTIN	17.9107	17.7532							H460	B-ACTIN	17.9107	17.7532							H460	B-ACTIN	17.9107	17.7532
		17.7119										17.7119										17.7119										17.7119										17.7119
PSLR-2		17.6369								PSLR-2		17.6369								PSLR-2		17.6369								PSLR-2		17.6369								PSLR-2		17.6369
	CDKN1A	21.5963	21.6643	3.84317	0.0696772	0.06654	0.00375725	0.00216925			GADD45A	22.6666	22.6409	4.91347	0.0331816	0.0338637	0.00296582	0.00171232			14-3-3-σ	23.015	23.0113	5.26185	0.0260631	0.0261315	0.000353219	0.000203931			CDK1	23.8877	23.6053	6.13455	0.0142336	0.0174766	0.00285727	0.00164964			CCNA2	25.2092	25.3571	7.45607	0.00569506	0.00515473	0.000477998	0.000275972
		21.756		4.00286	0.0623762							22.7509		4.99777	0.0312984							22.9903		5.2371	0.026514							23.5038		5.75067	0.0185727							25.4022		7.64903	0.00498209
		21.6407		3.88755	0.0675666							22.5052		4.752	0.0371112							23.0287		5.2755	0.0258176							23.4244		5.67127	0.0196236							25.4598		7.70665	0.00478703
Fold-change (indiv values)										Fold-change (indiv values)										Fold-change (indiv values)										Fold-change (indiv values)										Fold-change (indiv values)
Cells	lncRNA	AVG Q	p-values (2-tailed t-tests)			indiv log2 values				Cells	lncRNA	AVG Q	p-values (2-tailed t-tests)			indiv log2 values				Cells	lncRNA	AVG Q	p-values (2-tailed t-tests)			indiv log2 values				Cells	lncRNA	AVG Q	p-values (2-tailed t-tests)			indiv log2 values				Cells	lncRNA	AVG Q	p-values (2-tailed t-tests)			log2 values
A549	PSLR-1	37.9409	2.83409e-06			5.24568				A549	PSLR-1	39.7547	0.000991717			5.31305				A549	PSLR-1	44.143	0.000110174			5.46411				A549	PSLR-1	0.17184	0.00254271			-2.54087				A549	PSLR-1	0.147826	1.35959e-05			-2.75802
		40.7114				5.34736						26.9312				4.75121						55.2916				5.78899						0.217357				-2.20186						0.124844				-3.0018
		41.2379				5.3659						36.8662				5.20423						50.5658				5.66009						0.210838				-2.24579						0.122696				-3.02684
	PSLR-2	47.4421	2.38954e-05			5.5681					PSLR-2	8.3406	3.60648e-06			3.06015					PSLR-2	61.2637	6.18929e-06			5.93696					PSLR-2	0.0334704	0.00118934			-4.90097					PSLR-2	0.0326727	8.00037e-06			-4.93577
		54.4943				5.76803						7.93048				2.98741						59.6769				5.8991						0.0242413				-5.36639						0.0377929				-4.72574
		54.0897				5.75728						8.58523				3.10186						55.1193				5.78449						0.0272351				-5.19839						0.0364067				-4.77965
H460	PSLR-1	167.119	0.000529572			7.38473				H460	PSLR-1	217.43	1.84541e-06			7.7644				H460	PSLR-1	4.52219	1.16696e-06			2.17702				H460	PSLR-1	0.380869	0.000219548			-1.39264				H460	PSLR-1	0.146832	5.55396e-05			-2.76777
		119.383				6.89945						213.946				7.7411						4.57178				2.19276						0.381294				-1.39102						0.131542				-2.92641
		156.097				7.2863						201.16				7.6522						4.7238				2.23995						0.372235				-1.42572						0.131134				-2.93088
	PSLR-2	17.3245	8.63965e-06			4.11475					PSLR-2	37.6886	4.2886e-05			5.23605					PSLR-2	1.95814	3.62249e-05			0.969485					PSLR-2	0.167113	0.000110773			-2.5811					PSLR-2	0.455527	0.000361602			-1.13439
		15.5092				3.95505						35.5495				5.15176						1.99202				0.994229						0.218057				-2.19722						0.398499				-1.32735
		16.7998				4.07037						42.1518				5.39752						1.93969				0.955828						0.230395				-2.11782						0.382897				-1.38497
[truncated: 18 more columns]
