# Supplementary material for: Systematic lncRNA mapping to genome-wide co-essential modules uncovers cancer dependency on uncharacterized lncRNAs
Source: eLife. 2022 Jun 13;11:e77357. doi: 10.7554/eLife.77357 (PMC9191893; doi:10.7554/eLife.77357)
Supplement: Supplementary file 1. — (a) Long noncoding RNAs (lncRNAs) that have significantly enriched positive associations with essential genes. (b) lncRNAs that have significantly enriched negative associations with essential genes. (c) Reannotation of co-essential modules using cancer Hallmark gene set enrichment analysis. Genes in the individual modules can be obtained from PubMed ID: 33859415. (d) Reannotation of co-essential modules using Kyoto Encyclopedia of Genes and Genome (KEGG) pathway enrichment analysis. Genes in the individual modules can be obtained from PubMed ID: 33859415. (e) Number of co-essential modules significantly enriched with indicated KEGG pathways or Hallmark genesets. Rankings of individual pathways/genesets were based on number of co-essential modules. (f) Networks of lncRNA and co-essential modules. Co-essential module details can be obtained from PubMed ID: 33859415. (g) Meta-analysis-derived potential proliferation/growth-inducing lncRNAs. (h)Meta-analysis-derived potential proliferation/growth-suppressing lncRNAs. (i) Number of pubmed hits for individual lncRNAs. PubMed was searched on September 11, 2021. (j) lncRNAs that have more than twofold expression change in one or more cancer types. (k) Proliferation/growth-suppressing lncRNAs showing consistent upregulation across RNA-seq data. (l) Proliferation/growth-inducing lncRNAs showing consistent downregulation across RNA-seq data. [file elife-77357-supp1.xlsx]

## Sheet: Supplementary file 1a
Supplementary file 1a: lncRNAs that have significantly enriched positive associations with essential genes										Mitra et al.
Ensembl ID	Symbol	Adjusted Hypergeometric P
ENSG00000269524	AC245052.7	5.79e-201
ENSG00000232762	AL355483.3	2.67e-199
ENSG00000258303	AC012464.2	1.38e-192
ENSG00000176124	DLEU1	2.96e-191
ENSG00000234171	RNASEH1-AS1	1.46e-189
ENSG00000265749	AC135178.3	6.98e-188
ENSG00000235843	AL390961.3	3.9e-187
ENSG00000196756	SNHG17	2.19e-181
ENSG00000234264	DEPDC1-AS1	5.31e-181
ENSG00000272599	AC016394.1	1.13e-180
ENSG00000224738	AC099850.1	3.56e-180
ENSG00000225230	AC008937.1	1.72e-156
ENSG00000259469	AC084757.2	1.97e-149
ENSG00000261061	AC092718.4	2.96e-144
ENSG00000272716	AL121658.1	2.41e-142
ENSG00000254873	AP001267.1	2.45e-140
ENSG00000258378	AL139021.1	2.38e-136
ENSG00000261886	AC005670.1	3.25e-134
ENSG00000264808	AC068025.1	1.92e-129
ENSG00000224635	AL391095.1	4.76e-129
ENSG00000253121	AC120042.2	1.01e-125
ENSG00000231607	DLEU2	5.77e-125
ENSG00000255647	AC093510.1	3.12e-122
ENSG00000266651	AC093484.5	4.2e-119
ENSG00000267698	AC002116.2	6.57e-116
ENSG00000228838	AL355483.2	1.8e-115
ENSG00000266969	AP002449.1	1.86e-115
ENSG00000271936	AC012073.1	3.34e-114
ENSG00000225218	AP001628.1	1.62e-113
ENSG00000233538	AC017104.3	9.06e-112
ENSG00000260213	AC092718.2	1.59e-110
ENSG00000262712	AC012676.1	6.17e-110
ENSG00000268289	AC020908.1	6.51e-110
ENSG00000259408	AC010809.2	3.97e-108
ENSG00000226950	DANCR	1.51e-105
ENSG00000272817	AL359198.1	2.26e-105
ENSG00000260955	AC100821.2	2.61e-105
ENSG00000255857	PXN-AS1	3.58e-105
ENSG00000231595	AC005224.1	4.98e-102
ENSG00000266402	SNHG25	9.98e-101
ENSG00000269846	AL136172.1	2.17e-100
ENSG00000261431	AL023803.1	3.35e-100
ENSG00000263731	AC145207.5	1.19e-99
ENSG00000234160	AL513165.1	1.53e-99
ENSG00000266801	AC009137.2	1.53e-99
ENSG00000273063	AC007250.1	2.27e-99
ENSG00000249753	AC084357.2	5.07e-97
ENSG00000266469	AC005288.1	1.22e-96
ENSG00000236200	KDM4A-AS1	4.27e-96
ENSG00000261560	AC007216.3	4.27e-96
ENSG00000243960	AL390195.1	5.28e-96
ENSG00000232623	AP000266.1	5.9e-96
ENSG00000272269	AL138724.1	1.19e-95
ENSG00000259713	AC013391.2	1.53e-93
ENSG00000225484	NUTM2B-AS1	8.06e-93
ENSG00000267321	LINC02001	8.51e-93
ENSG00000258017	AC011603.2	4.43e-92
ENSG00000261783	AC009054.2	9.36e-92
ENSG00000232956	SNHG15	1.14e-91
ENSG00000235236	AC137630.2	1.18e-91
ENSG00000228889	UBAC2-AS1	1.35e-91
ENSG00000236065	AL020995.1	2.1e-91
ENSG00000223461	AC004471.1	6.37e-91
ENSG00000271754	AL355802.3	8.6e-90
ENSG00000250988	SNHG21	3.42e-89
ENSG00000264577	AC010761.1	6.5e-86
ENSG00000267583	AC007998.3	2.8e-85
ENSG00000234753	FOXP4-AS1	8.47e-85
ENSG00000245248	USP2-AS1	6.91e-84
ENSG00000270141	TERC	3.17e-83
ENSG00000260830	AL135744.1	3.33e-83
ENSG00000272711	AC019069.1	1.1e-82
ENSG00000259254	AC022405.1	1.72e-82
ENSG00000260381	AC007610.2	2.34e-82
ENSG00000270696	AC005034.3	2.79e-82
ENSG00000268798	AC027307.3	2.06e-80
ENSG00000272263	AC034198.2	3.05e-80
ENSG00000240549	THOC7-AS1	1.62e-79
ENSG00000270159	AC018695.3	5.57e-79
ENSG00000253961	AC009563.1	3.19e-78
ENSG00000227963	AL355488.1	5.64e-78
ENSG00000248896	AC105001.1	2.62e-77
ENSG00000273306	AC018690.1	9.25e-77
ENSG00000232936	AL157400.2	2.51e-76
ENSG00000263826	AC112907.3	5.85e-76
ENSG00000249084	AC027627.1	6.94e-73
ENSG00000232335	AL354864.1	2.41e-72
ENSG00000261373	VPS9D1-AS1	9.18e-72
ENSG00000240288	GHRLOS	7.71e-71
ENSG00000257222	AC079907.1	9.25e-71
ENSG00000254791	FAR1-IT1	1.48e-70
ENSG00000261266	AC008870.3	9.81e-70
ENSG00000255348	AP001775.2	2.42e-67
ENSG00000251556	AC091887.1	3.6e-66
ENSG00000255121	AP003392.4	5.31e-66
ENSG00000247092	SNHG10	6.4e-66
ENSG00000259514	AC027243.1	9.17e-66
ENSG00000267255	AC011498.3	1.03e-65
ENSG00000272540	AL662797.3	2.31e-65
ENSG00000248476	BACH1-IT1	2.37e-65
ENSG00000236498	AC107081.2	2.52e-65
ENSG00000231177	LINC00852	4.21e-65
ENSG00000266975	FARSA-AS1	6.62e-65
ENSG00000266783	AP005136.2	7.4e-65
ENSG00000248968	AC012640.1	1.35e-64
ENSG00000254397	AC132192.1	1.47e-64
ENSG00000198468	FLVCR1-AS1	4.49e-63
ENSG00000267150	AC006557.1	7.26e-63
ENSG00000247240	UBL7-AS1	1.06e-62
ENSG00000272498	AC090948.2	1.54e-62
ENSG00000255893	AP000786.1	4.02e-62
ENSG00000254900	AC091053.2	5.08e-62
ENSG00000223692	DIP2A-IT1	5.41e-62
ENSG00000263235	AC006111.2	1.26e-61
ENSG00000271989	AL139424.1	1.61e-61
ENSG00000269951	AC090181.2	1.67e-61
ENSG00000267141	AC012615.4	1.69e-61
ENSG00000272529	AC090948.3	1.95e-61
ENSG00000256712	AC134349.1	2.28e-61
ENSG00000244332	AL138759.1	2.78e-60
ENSG00000251221	LINC01337	3.07e-60
ENSG00000258731	AL356020.1	3.11e-60
ENSG00000259768	AC004943.2	4.45e-60
ENSG00000235319	AC012360.1	9.97e-60
ENSG00000242125	SNHG3	1.58e-59
ENSG00000266126	AC005730.3	5.89e-59
ENSG00000235795	AC093157.2	5.93e-59
ENSG00000237934	AL590729.1	1.3e-58
ENSG00000270137	AF230666.2	1.99e-58
ENSG00000259287	AC010809.1	2.42e-57
ENSG00000236896	AL354726.1	2.43e-57
ENSG00000272945	AL356299.2	2.72e-57
ENSG00000260259	LINC02166	3.11e-57
ENSG00000261140	AC093525.4	7.63e-57
ENSG00000254694	AP001893.1	1.18e-56
ENSG00000235530	AC087294.1	5.86e-56
ENSG00000266897	AC005546.1	1.38e-55
ENSG00000256442	AC010186.1	2.32e-55
ENSG00000262777	AC032044.1	2.77e-55
ENSG00000260060	AC009088.1	8.63e-55
ENSG00000250027	AC022272.1	1.01e-54
ENSG00000261428	AC097461.1	1.07e-54
ENSG00000257596	AC078778.1	1.09e-54
ENSG00000255717	SNHG1	1.48e-54
ENSG00000269974	AC091057.3	1.98e-54
ENSG00000261216	AC007216.2	3.34e-54
ENSG00000227598	Z94721.1	4.05e-54
ENSG00000234578	AL355483.4	1.07e-53
ENSG00000225163	LINC00618	1.32e-53
ENSG00000258344	AC078778.2	1.48e-53
ENSG00000228802	AC073641.1	2.7e-53
ENSG00000225675	LINC01771	6.62e-53
ENSG00000226920	AL160004.1	1.25e-52
ENSG00000253754	AC087620.1	2.28e-52
ENSG00000224888	AC138028.2	3.38e-52
ENSG00000231724	AC112907.1	3.53e-52
ENSG00000250734	AL391335.1	9.58e-52
ENSG00000205790	DPP9-AS1	4.04e-51
ENSG00000267655	AC125437.1	4.58e-51
ENSG00000245970	AP003352.1	5.83e-51
ENSG00000263013	AC133065.4	5.95e-51
ENSG00000237605	AL591846.2	2.5e-50
ENSG00000273466	AC012510.1	2.79e-50
ENSG00000265415	AC099850.3	6.74e-50
ENSG00000231125	AF129075.1	1.47e-49
ENSG00000228192	AL512353.1	1.53e-49
ENSG00000261433	AC002347.1	2.5e-49
ENSG00000272800	AC021851.1	6.99e-49
ENSG00000239608	RUVBL1-AS1	7.06e-49
ENSG00000260608	AC024270.4	7.69e-49
ENSG00000273216	AC002059.1	8.6e-49
ENSG00000261008	LINC01572	1.03e-48
ENSG00000266601	AC018521.6	2.68e-48
ENSG00000245322	AC097460.1	3.58e-48
ENSG00000241818	AC123768.1	4.55e-48
ENSG00000226180	AC010536.1	1.06e-47
ENSG00000236618	PITPNA-AS1	1.57e-47
ENSG00000234327	AC012146.1	1.67e-47
ENSG00000258365	AC073655.2	2.19e-47
ENSG00000228817	BACH1-IT2	4.73e-47
ENSG00000268536	AC005523.1	4.89e-47
ENSG00000269570	AP001350.1	6.11e-47
ENSG00000242349	NPPA-AS1	1.29e-46
ENSG00000235079	ZRANB2-AS1	3.33e-46
ENSG00000226688	ENTPD1-AS1	8.38e-46
ENSG00000237756	AL592435.1	1.17e-45
ENSG00000259083	AL132639.3	1.71e-45
ENSG00000259659	AC009996.1	2.27e-45
ENSG00000231073	AL590133.1	3.46e-45
ENSG00000261762	AC027228.2	8.09e-45
ENSG00000234129	AC073529.1	1.74e-44
ENSG00000257497	AC121761.1	1.89e-44
ENSG00000239791	AC002310.2	2.23e-44
ENSG00000255692	AC002563.1	3.64e-44
ENSG00000236308	AL138921.2	6.68e-44
ENSG00000255237	AC138230.1	7.13e-44
ENSG00000253695	AC011008.1	8.82e-44
ENSG00000269940	AL049840.3	1.02e-43
ENSG00000223821	AL603910.1	1.44e-43
ENSG00000273353	AL008718.3	2.49e-43
ENSG00000255198	SNHG9	3.89e-43
ENSG00000273056	AL354694.1	4.09e-43
ENSG00000234832	AL096677.1	9.62e-43
ENSG00000260190	AL807752.5	1.3e-42
ENSG00000262251	AC087388.1	2.27e-42
ENSG00000238062	SPATA3-AS1	3.4e-42
ENSG00000273338	AC103591.3	3.92e-42
ENSG00000235806	AF241728.1	9.71e-42
ENSG00000269534	AC011466.3	1.08e-41
ENSG00000236519	LINC01424	1.24e-41
ENSG00000228302	AL512770.1	1.37e-41
ENSG00000262147	AC124283.2	1.5e-41
ENSG00000261441	AC124068.2	1.64e-41
ENSG00000229983	AL606468.1	2.14e-41
ENSG00000229587	AL158825.2	2.96e-41
ENSG00000266717	AC134407.1	4.93e-41
ENSG00000224707	E2F3-IT1	1.9e-40
ENSG00000215417	MIR17HG	4.82e-40
ENSG00000257964	AC020612.3	7e-40
ENSG00000244380	AC134772.1	7.31e-40
ENSG00000262837	AC027801.5	1.7e-39
ENSG00000272186	AP003392.6	2.21e-39
ENSG00000269901	AC010531.5	7.87e-39
ENSG00000256628	ZBTB11-AS1	2.24e-38
ENSG00000254208	AC011773.1	5.45e-38
ENSG00000263727	AP001178.1	5.46e-38
ENSG00000257303	AC073896.2	8.24e-38
ENSG00000269983	AC146944.4	1.36e-37
ENSG00000256008	AC125616.1	1.51e-37
ENSG00000271751	AP003392.5	1.51e-37
ENSG00000233296	AC092159.2	1.81e-37
ENSG00000259396	AC087721.1	3.1e-37
ENSG00000226706	AL161452.1	3.99e-37
ENSG00000267356	AC006557.3	5.61e-37
ENSG00000226645	AP006216.1	6.77e-37
ENSG00000260304	AC009088.2	1.58e-36
ENSG00000225798	AC025918.1	2.65e-36
ENSG00000267040	AC027097.1	4.43e-36
ENSG00000226800	CACTIN-AS1	4.62e-36
ENSG00000249655	AC008434.1	7.37e-36
ENSG00000262202	AC007952.4	1.22e-35
ENSG00000237054	PRMT5-AS1	1.87e-35
ENSG00000260100	AL512604.3	2e-35
ENSG00000260018	AC040169.1	2.13e-35
ENSG00000257135	AC007249.2	2.69e-35
ENSG00000219665	AC008770.1	3.39e-35
ENSG00000260924	LINC01311	3.41e-35
ENSG00000239335	LLPH-AS1	9.57e-35
ENSG00000272604	AC073073.2	1.26e-34
ENSG00000232648	AC107214.1	1.4e-34
ENSG00000272707	AC046143.2	1.63e-34
ENSG00000235908	RHOA-IT1	1.75e-34
ENSG00000232995	RGS5	2.43e-34
ENSG00000269321	AC011466.2	2.73e-34
ENSG00000254760	AC008750.1	3.99e-34
ENSG00000260260	SNHG19	6.68e-34
ENSG00000228701	TNKS2-AS1	7.05e-34
ENSG00000262222	AC133065.2	1.16e-33
ENSG00000260814	AC073657.1	1.21e-33
ENSG00000271870	AC024060.1	1.73e-33
ENSG00000271840	AL031281.2	2.4e-33
ENSG00000260743	AC007823.1	4.38e-33
ENSG00000232732	AC097717.1	9.63e-33
ENSG00000237718	AC009095.1	9.66e-33
ENSG00000248774	AC097534.1	1.52e-32
ENSG00000269947	AC135178.5	5.71e-32
ENSG00000176912	TYMSOS	2.57e-31
ENSG00000270062	AL606834.3	2.57e-31
ENSG00000203644	AC083799.1	3.62e-31
ENSG00000203362	AL355802.1	5.53e-31
ENSG00000259652	AC090181.1	6.42e-31
ENSG00000247228	AC009060.1	7.07e-31
ENSG00000256538	AC046130.2	1.26e-30
ENSG00000260773	AC055855.2	1.26e-30
ENSG00000269535	AC010320.4	1.78e-30
ENSG00000264235	AP005329.1	1.82e-30
ENSG00000272593	AL359091.2	2.42e-30
ENSG00000248559	AC109454.2	2.63e-30
ENSG00000235381	AL596202.1	3.06e-30
ENSG00000260442	ATP2A1-AS1	3.17e-30
ENSG00000269958	AL049840.4	3.53e-30
ENSG00000245482	AC046130.1	4.54e-30
ENSG00000269148	AC092301.1	4.64e-30
ENSG00000256897	AC018410.2	7.03e-30
ENSG00000261079	AC009053.2	1.08e-29
ENSG00000257953	AC083805.2	1.22e-29
ENSG00000273162	AL133215.2	1.3e-29
ENSG00000229832	AL360091.1	1.76e-29
ENSG00000271964	AC090948.1	1.85e-29
ENSG00000205664	BX890604.1	2.24e-29
ENSG00000260708	AL118516.1	2.69e-29
ENSG00000260671	AC010536.2	4.98e-29
ENSG00000261351	AC116913.1	6.44e-29
ENSG00000267758	AC099811.4	1.26e-28
ENSG00000264273	AC107982.2	1.46e-28
ENSG00000227215	AL355613.1	2.08e-28
ENSG00000263884	AP000845.1	2.38e-28
ENSG00000213279	Z97192.2	2.61e-28
ENSG00000224046	AC005076.1	2.88e-28
ENSG00000235910	APOA1-AS	4.71e-28
ENSG00000163597	SNHG16	4.94e-28
ENSG00000269656	NOP53-AS1	5.43e-28
ENSG00000268375	AC010325.2	9.86e-28
ENSG00000258454	AC016526.2	1.01e-27
ENSG00000177340	FLJ13224	1.11e-27
ENSG00000219410	AC125494.1	1.35e-27
ENSG00000255135	AP002360.2	4.49e-27
ENSG00000250057	AC114781.2	4.51e-27
ENSG00000254428	AP003392.1	7.13e-27
ENSG00000260063	AL512408.1	7.34e-27
ENSG00000233844	KCNQ5-IT1	1.02e-26
ENSG00000236991	EDRF1-AS1	1.29e-26
ENSG00000262514	AC020978.7	1.36e-26
ENSG00000247151	CSTF3-AS1	1.39e-26
ENSG00000271828	AC008937.3	1.92e-26
ENSG00000263393	AC011825.2	4.23e-26
ENSG00000267100	ILF3-AS1	5.51e-26
ENSG00000163009	C2orf48	7.56e-26
ENSG00000271851	AC087501.5	1.71e-25
ENSG00000236194	AC099811.1	2.41e-25
ENSG00000273450	AL139124.1	2.6e-25
ENSG00000260698	AL591848.3	2.86e-25
ENSG00000244513	AC109587.1	2.87e-25
ENSG00000267096	AC008735.1	2.98e-25
ENSG00000233016	SNHG7	7.09e-25
ENSG00000254671	STT3A-AS1	8.79e-25
ENSG00000258908	AL355075.3	9.37e-25
ENSG00000186615	KTN1-AS1	1.19e-24
ENSG00000232656	IDI2-AS1	1.23e-24
ENSG00000128254	C22orf24	1.24e-24
ENSG00000260806	AL163051.1	1.33e-24
ENSG00000257167	TMPO-AS1	1.65e-24
ENSG00000260388	LINC00562	1.91e-24
ENSG00000230185	C9orf147	7.72e-24
ENSG00000175611	LINC00476	8.03e-24
ENSG00000268945	AC010422.2	8.82e-24
ENSG00000228352	AL354989.1	8.85e-24
ENSG00000260252	AC009087.1	9.7e-24
ENSG00000253829	AC067817.2	9.74e-24
ENSG00000227071	FOCAD-AS1	1.02e-23
ENSG00000231074	HCG18	1.55e-23
ENSG00000225470	JPX	2.56e-23
ENSG00000259093	AL137191.1	3.3e-23
ENSG00000267298	AC006116.5	4.88e-23
ENSG00000270067	AC008536.1	5.14e-23
ENSG00000249637	AC008438.1	1.16e-22
ENSG00000271862	AC104118.1	1.22e-22
ENSG00000253633	AP002852.2	1.3e-22
ENSG00000258857	AL359397.1	1.39e-22
ENSG00000261071	AL441883.1	1.41e-22
ENSG00000253618	GRPEL2-AS1	1.53e-22
ENSG00000214248	AC010336.1	1.89e-22
ENSG00000257475	AC068888.2	2.02e-22
ENSG00000253744	AC025442.1	2.2e-22
ENSG00000236364	AL358115.1	4.55e-22
ENSG00000228629	AC092295.1	5.03e-22
ENSG00000250365	AL139353.2	5.55e-22
ENSG00000236472	AC002401.1	5.67e-22
ENSG00000180846	CSNK1G2-AS1	6.44e-22
ENSG00000259209	AC004943.1	8.26e-22
ENSG00000244327	AC109992.2	8.42e-22
ENSG00000256299	AC073912.2	8.91e-22
ENSG00000260545	AC026771.1	9.98e-22
ENSG00000259994	AL353796.1	1.09e-21
ENSG00000268583	AC011466.1	1.17e-21
ENSG00000271843	AC012557.1	1.28e-21
ENSG00000236545	AP001619.2	1.76e-21
ENSG00000183308	AC005037.1	1.86e-21
ENSG00000267030	AC011498.2	1.95e-21
ENSG00000265010	AC087301.1	3.38e-21
ENSG00000235111	Z97192.3	4.56e-21
ENSG00000256690	AP001160.1	4.74e-21
ENSG00000250081	AC025176.1	5.04e-21
ENSG00000259767	AC022558.1	5.07e-21
ENSG00000231871	IPO9-AS1	5.41e-21
ENSG00000260005	AC027601.1	9.96e-21
ENSG00000255441	AC008750.2	1.35e-20
ENSG00000231993	EP300-AS1	1.42e-20
ENSG00000261167	AC107027.3	1.48e-20
ENSG00000262380	AC026401.2	1.63e-20
ENSG00000233184	AC093157.1	1.83e-20
ENSG00000268266	AC003005.2	2.3e-20
ENSG00000273449	AC093788.1	2.54e-20
ENSG00000226647	AL365356.1	2.9e-20
ENSG00000265800	AC022211.3	6.16e-20
ENSG00000253390	AC104561.1	6.19e-20
ENSG00000237015	AL031186.1	7.25e-20
ENSG00000260589	STAM-AS1	7.38e-20
ENSG00000226803	AL136311.1	9.68e-20
ENSG00000270049	AC009061.2	9.98e-20
ENSG00000272994	AC012360.3	1.16e-19
ENSG00000228369	TXNDC12-AS1	1.21e-19
ENSG00000264829	AC087749.2	1.4e-19
ENSG00000267197	AC011461.1	1.99e-19
ENSG00000255933	AC117500.3	2.33e-19
ENSG00000176349	AC104129.1	2.67e-19
ENSG00000232233	LINC02043	2.68e-19
ENSG00000272909	AL122035.2	2.8e-19
ENSG00000272476	AL024507.2	3.73e-19
ENSG00000255094	AC090159.1	3.76e-19
ENSG00000196951	SCOC-AS1	4.47e-19
ENSG00000236088	COX10-AS1	5.14e-19
ENSG00000261396	AC027682.5	6.56e-19
ENSG00000225037	EIF1AX-AS1	7.48e-19
ENSG00000257285	AL132780.1	1.08e-18
ENSG00000237424	FOXD2-AS1	1.11e-18
ENSG00000253986	AC104561.3	1.17e-18
ENSG00000260448	LCMT1-AS1	1.18e-18
ENSG00000247137	AP000873.2	1.47e-18
ENSG00000188511	C22orf34	1.71e-18
ENSG00000260804	LINC01963	2.06e-18
ENSG00000232832	LMLN-AS1	2.78e-18
ENSG00000254034	INTS9-AS1	2.87e-18
ENSG00000260651	AF213884.3	3.22e-18
ENSG00000251323	AP003086.1	3.61e-18
ENSG00000270184	AC018695.4	3.71e-18
ENSG00000243819	RN7SL832P	3.95e-18
ENSG00000272367	AC018754.1	6.15e-18
ENSG00000231731	AC010976.1	6.15e-18
ENSG00000266936	AC011442.1	6.57e-18
ENSG00000272308	AC104113.1	1.13e-17
ENSG00000268889	AC008750.7	1.36e-17
ENSG00000272518	AC036214.2	1.53e-17
ENSG00000270195	AC016773.1	1.61e-17
ENSG00000257913	DDN-AS1	1.64e-17
ENSG00000203993	ARRDC1-AS1	1.74e-17
ENSG00000269937	AC093525.7	1.84e-17
ENSG00000178440	LINC00843	1.86e-17
ENSG00000223374	AC005104.1	1.94e-17
ENSG00000267751	AC009005.1	2.02e-17
ENSG00000269482	Z69720.1	2.85e-17
ENSG00000187904	AC097382.1	2.97e-17
ENSG00000265458	AC132938.3	3.07e-17
ENSG00000273343	AC007663.4	3.96e-17
ENSG00000255308	AC009652.2	6.98e-17
ENSG00000228485	GRK5-IT1	7.26e-17
ENSG00000259488	AC023355.1	1.01e-16
ENSG00000263843	AC022211.2	1.07e-16
ENSG00000233589	AL138789.1	1.19e-16
ENSG00000240889	NDUFB2-AS1	1.45e-16
ENSG00000237126	AC073254.1	1.54e-16
ENSG00000269688	AC008982.2	1.65e-16
ENSG00000234912	SNHG20	1.67e-16
ENSG00000260196	AC124798.1	2.03e-16
ENSG00000263924	AC022960.1	2.07e-16
ENSG00000272483	AC022001.3	2.47e-16
ENSG00000272087	AC080013.4	2.51e-16
ENSG00000260360	AL353708.1	2.73e-16
ENSG00000229388	LINC01715	3.2e-16
ENSG00000227540	DNAJC9-AS1	3.22e-16
ENSG00000235852	AC005540.1	4.67e-16
ENSG00000225822	UBXN7-AS1	5.41e-16
ENSG00000254420	AP003086.2	6.33e-16
ENSG00000248468	AC107027.1	6.74e-16
ENSG00000266289	AC012213.3	7.5e-16
ENSG00000203321	C9orf41-AS1	9.86e-16
ENSG00000231327	LINC01816	1.03e-15
ENSG00000258384	AC068831.3	1.17e-15
ENSG00000260277	AC009019.1	1.61e-15
ENSG00000230433	AL031770.1	2.09e-15
ENSG00000237200	ZBTB40-IT1	2.54e-15
ENSG00000248275	TRIM52-AS1	2.59e-15
ENSG00000237976	AL391069.3	2.67e-15
ENSG00000231365	AL359915.2	2.79e-15
ENSG00000257740	AC073896.3	2.79e-15
ENSG00000237356	AL365295.1	2.88e-15
ENSG00000261777	AC012184.3	4.63e-15
ENSG00000259364	AC013356.3	5.23e-15
ENSG00000237399	PITRM1-AS1	5.88e-15
ENSG00000236643	AL354928.1	1.05e-14
ENSG00000264270	AC087749.1	1.47e-14
ENSG00000259326	AC116158.1	1.55e-14
ENSG00000267249	AP005482.3	1.59e-14
ENSG00000228237	EFCAB14-AS1	1.64e-14
ENSG00000249868	AC136777.1	1.98e-14
ENSG00000253738	OTUD6B-AS1	2.25e-14
ENSG00000271199	AL353804.2	2.25e-14
ENSG00000228124	AL096678.1	3.12e-14
ENSG00000246323	AC113382.1	3.32e-14
ENSG00000246089	AC016065.1	3.37e-14
ENSG00000239653	PSMD6-AS2	3.61e-14
ENSG00000272583	AL592494.3	3.84e-14
ENSG00000271991	AC013400.1	3.98e-14
ENSG00000259187	AC122108.1	4.58e-14
ENSG00000254433	AP001001.1	4.93e-14
ENSG00000216895	AC009403.1	5.38e-14
ENSG00000248925	AC021087.1	8.54e-14
ENSG00000258904	AL157871.5	8.54e-14
ENSG00000230530	LIMD1-AS1	8.58e-14
ENSG00000230555	AL450326.1	1.1e-13
ENSG00000260423	LINC02367	1.31e-13
ENSG00000245711	NADK2-AS1	1.39e-13
ENSG00000245534	RORA-AS1	1.41e-13
ENSG00000244184	AC091153.3	1.45e-13
ENSG00000233922	LINC01694	2.02e-13
ENSG00000224870	AL391244.1	2.07e-13
ENSG00000261430	AL031600.2	2.26e-13
ENSG00000203875	SNHG5	2.32e-13
ENSG00000263657	AC023389.1	4.24e-13
ENSG00000263823	AC009831.1	5.86e-13
ENSG00000272037	AP002907.1	7.09e-13
ENSG00000234945	GTF3C2-AS1	7.75e-13
ENSG00000263786	AC022211.1	7.88e-13
ENSG00000243410	PSMD6-AS1	8.16e-13
ENSG00000253476	AC091185.1	8.48e-13
ENSG00000232907	DLGAP4-AS1	8.84e-13
ENSG00000230747	AC021188.1	9.77e-13
ENSG00000259623	AC125257.1	1.03e-12
ENSG00000230002	ALMS1-IT1	1.11e-12
ENSG00000228434	AC004951.1	1.51e-12
ENSG00000228906	AL353804.1	1.63e-12
ENSG00000228397	LINC01635	1.77e-12
ENSG00000270083	AL021878.2	1.92e-12
ENSG00000249664	AC027338.1	2.05e-12
ENSG00000272455	AL391244.3	2.42e-12
ENSG00000227245	AC092042.1	2.48e-12
ENSG00000235078	AC231981.1	2.76e-12
ENSG00000269949	AC069307.1	2.81e-12
ENSG00000254641	AC091564.3	2.93e-12
ENSG00000262703	AC009121.1	3.18e-12
ENSG00000270673	YTHDF3-AS1	3.51e-12
ENSG00000251666	ZNF346-IT1	4.1e-12
ENSG00000249532	AC106864.1	5.13e-12
ENSG00000245025	AC107959.1	6.51e-12
ENSG00000269825	AC022150.4	9.14e-12
ENSG00000259684	AC084756.1	9.46e-12
ENSG00000263276	AC020978.8	1.1e-11
ENSG00000248996	AC145098.1	1.36e-11
ENSG00000205559	CHKB-AS1	1.4e-11
ENSG00000268218	AC137932.3	1.45e-11
ENSG00000259212	AC103739.1	1.52e-11
ENSG00000260898	ADPGK-AS1	1.53e-11
ENSG00000228343	AC115618.2	1.66e-11
ENSG00000270638	AL023806.1	2.3e-11
ENSG00000234917	AC098484.2	2.53e-11
ENSG00000246174	KCTD21-AS1	2.67e-11
ENSG00000272129	AL359715.4	2.72e-11
ENSG00000260927	AC009107.2	2.76e-11
ENSG00000258725	PRC1-AS1	3.21e-11
ENSG00000224875	AC083949.1	3.88e-11
ENSG00000272843	AC211476.2	4.9e-11
ENSG00000232754	AL035658.1	5.4e-11
ENSG00000225527	AL450384.1	5.69e-11
ENSG00000261096	AC073476.3	5.94e-11
ENSG00000228382	ITPKB-IT1	7.47e-11
ENSG00000258172	AC073655.1	8.29e-11
ENSG00000262171	AC130651.2	9.59e-11
ENSG00000273342	AP000553.2	9.69e-11
ENSG00000255139	AP000442.2	9.78e-11

## Sheet: Supplementary file 1b
Supplementary file 1b: lncRNAs that have significantly enriched negative associations with essential genes										Mitra et al.
Ensembl ID	Symbol	Adjusted Hypergeometric P
ENSG00000227192	AL023581.2	1.02e-107
ENSG00000261105	LMO7-AS1	2.47e-103
ENSG00000235609	AF127577.4	2.71e-102
ENSG00000273123	AC020634.1	5.14e-102
ENSG00000224899	AC019155.3	9.57e-100
ENSG00000254333	NDST1-AS1	4.04e-99
ENSG00000261656	BEAN1-AS1	2.54e-98
ENSG00000214145	LINC00887	2.54e-98
ENSG00000242578	AC073288.2	8.38e-97
ENSG00000177112	MRVI1-AS1	3.66e-96
ENSG00000251432	AC108062.1	3.17e-92
ENSG00000251381	LINC00958	6.8e-92
ENSG00000269976	AC012065.3	7.6e-92
ENSG00000223975	AP001048.1	3.97e-89
ENSG00000272824	AC245100.7	2.61e-88
ENSG00000272582	AL031587.3	1.74e-86
ENSG00000261888	AC144831.1	2.82e-86
ENSG00000224897	POT1-AS1	6.38e-86
ENSG00000235947	EGOT	1.38e-85
ENSG00000269946	AL158152.2	3.12e-85
ENSG00000272950	AC093799.2	1.53e-84
ENSG00000228288	PCAT6	3.88e-82
ENSG00000272459	AC139795.3	1.61e-81
ENSG00000248727	LINC01948	1.71e-81
ENSG00000255306	AC004923.4	3.12e-81
ENSG00000227533	SLC2A1-AS1	3.84e-80
ENSG00000225511	LINC00475	3.73e-79
ENSG00000260179	AL162741.1	3.99e-79
ENSG00000233393	AP000688.2	6.79e-78
ENSG00000259717	LINC00677	3.05e-76
ENSG00000224596	ZMIZ1-AS1	3.45e-76
ENSG00000223855	HRAT92	3.64e-75
ENSG00000182165	TP53TG1	3.62e-73
ENSG00000234840	LINC01239	3.34e-72
ENSG00000234546	LINC01759/GUARDIN	3.7e-71
ENSG00000267919	AC009955.2	9.67e-71
ENSG00000263627	PPP4R1-AS1	2.33e-69
ENSG00000258667	HIF1A-AS2	2.78e-68
ENSG00000236548	RNF217-AS1	5.36e-68
ENSG00000270000	AC005479.3	7.07e-68
ENSG00000240875	LINC00886	9.05e-68
ENSG00000236318	AC019117.2	2.66e-67
ENSG00000231324	AP000696.1	3.33e-67
ENSG00000272523	LINC01023	4.75e-67
ENSG00000234807	LINC01135	1.47e-66
ENSG00000221845	C7orf65	4.86e-66
ENSG00000231574	LINC02015	5.1e-64
ENSG00000230943	LINC02541	5.92e-64
ENSG00000236064	AL034399.2	2.26e-63
ENSG00000234869	AL021392.1	5.41e-61
ENSG00000232079	LINC01697	8.24e-61
ENSG00000257086	AP001453.3	1.41e-60
ENSG00000259065	AC005520.2	1.82e-60
ENSG00000250303	AP002884.3	7.12e-59
ENSG00000270001	AL121894.2	2.06e-58
ENSG00000229109	AL137847.1	8.93e-58
ENSG00000255345	AP002957.1	1.39e-57
ENSG00000272715	AL157904.1	2.53e-57
ENSG00000267922	AC007785.1	4.53e-57
ENSG00000268460	AC006262.1	6.27e-57
ENSG00000236039	AC019117.1	9.37e-56
ENSG00000251562	MALAT1	1.29e-55
ENSG00000231367	AC011247.1	1.29e-55
ENSG00000259005	AC005479.2	2.42e-55
ENSG00000228526	MIR34AHG	4.55e-55
ENSG00000270210	AC104695.2	7.79e-55
ENSG00000260911	AC135050.3	8.38e-55
ENSG00000267892	AC022144.1	2.23e-54
ENSG00000250602	AC093535.1	3.89e-54
ENSG00000254531	FLJ20021	8.24e-54
ENSG00000223829	AC004870.2	1.22e-52
ENSG00000253102	AC004707.1	1.58e-52
ENSG00000258793	AL355102.4	1.89e-52
ENSG00000235271	LINC01422	1.91e-52
ENSG00000231969	AC007364.1	1.53e-51
ENSG00000237512	UNC5B-AS1	1.57e-51
ENSG00000233895	AL121761.1	1.95e-51
ENSG00000258955	LINC00519	8.33e-51
ENSG00000250174	MYLK-AS2	6.41e-50
ENSG00000236204	LINC01376	9.36e-50
ENSG00000265752	AC010754.1	1.68e-49
ENSG00000228221	LINC00578	2.06e-49
ENSG00000257595	LINC02356	2.08e-49
ENSG00000185186	LINC00313	5.14e-49
ENSG00000271133	AC004130.1	6.04e-49
ENSG00000226496	LINC00323	1.4e-48
ENSG00000231948	HS1BP3-IT1	1.5e-48
ENSG00000260581	AC011374.1	1.52e-48
ENSG00000224116	INHBA-AS1	2.22e-48
ENSG00000231312	AC007388.1	2.99e-48
ENSG00000251396	LINC01301	4.65e-48
ENSG00000203392	AC105020.1	1.96e-47
ENSG00000267582	AC020916.2	8.12e-47
ENSG00000272482	AC254633.1	1.06e-46
ENSG00000237529	AL137847.2	2.07e-46
ENSG00000235770	LINC00607	3.02e-46
ENSG00000271259	AC010201.1	3.3e-46
ENSG00000266680	AL135905.2	3.48e-46
ENSG00000227482	AL157702.2	5e-46
ENSG00000257443	AC068305.3	6.78e-46
ENSG00000273305	AC009237.15	7.12e-46
ENSG00000269899	AC025857.2	7.53e-46
ENSG00000229512	AC068580.1	3.08e-45
ENSG00000232774	FLJ22447	5.84e-45
ENSG00000272668	AL590560.2	7.68e-45
ENSG00000249407	IL20RB-AS1	1.45e-44
ENSG00000267852	AC119396.2	2.66e-44
ENSG00000226328	NUP50-AS1	3.5e-44
ENSG00000259345	AC013652.1	5.88e-44
ENSG00000265413	AP001094.2	7.25e-44
ENSG00000233006	MIR3936HG	8.23e-44
ENSG00000268423	AC093503.1	1.46e-43
ENSG00000226386	PARD3-AS1	1.49e-43
ENSG00000272941	AC083862.2	1.73e-43
ENSG00000272279	AL512329.2	3.34e-43
ENSG00000243062	AL359853.3	3.71e-43
ENSG00000231013	AC013275.1	3.93e-43
ENSG00000231713	AF064860.2	4.44e-43
ENSG00000188660	LINC00319	4.67e-43
ENSG00000255438	AL354813.1	6.12e-43
ENSG00000267151	MIR2117HG	6.39e-43
ENSG00000249348	UGDH-AS1	1.21e-42
ENSG00000225981	AC102953.1	2.43e-42
ENSG00000268621	IGFL2-AS1	7.27e-42
ENSG00000236384	LINC00479	1.67e-41
ENSG00000271344	AC018638.6	2.04e-41
ENSG00000225643	AL606491.1	2.59e-41
ENSG00000267052	AC005050.1	3.8e-41
ENSG00000233452	STXBP5-AS1	3.8e-41
ENSG00000238042	LINC02257	6.77e-41
ENSG00000263745	AP005230.1	8.59e-41
ENSG00000243902	ELFN2	9.72e-41
ENSG00000268603	AC053503.5	1.3e-40
ENSG00000273248	AC010997.5	1.67e-40
ENSG00000232229	LINC00865	8.29e-39
ENSG00000258711	AL358334.2	8.63e-39
ENSG00000259450	AC113146.2	1.13e-38
ENSG00000235790	AC114488.2	1.47e-38
ENSG00000234902	AC007879.3	1.96e-38
ENSG00000237862	Z94160.1	2.13e-38
ENSG00000233539	AC011294.1	3.26e-38
ENSG00000272933	AL391121.1	6.02e-38
ENSG00000226125	LINC01907	1.05e-37
ENSG00000259867	AC105411.1	1.62e-37
ENSG00000187185	AC092118.1	3.03e-37
ENSG00000250889	LINC01336	3.1e-37
ENSG00000197182	MIRLET7BHG	3.79e-37
ENSG00000235385	LINC02154	3.96e-37
ENSG00000265666	RARA-AS1	4.67e-37
ENSG00000257829	AC121757.1	6.77e-37
ENSG00000251603	AC092611.2	9.69e-37
ENSG00000232453	AC105277.1	1.31e-36
ENSG00000249180	AC020900.1	1.74e-36
ENSG00000236830	CBR3-AS1	2.69e-36
ENSG00000267282	AC011481.2	3.1e-36
ENSG00000259976	AC093010.3	6.06e-36
ENSG00000268743	AC008737.1	9.43e-36
ENSG00000240440	AC007879.4	1.38e-35
ENSG00000237807	AC022034.2	1.57e-35
ENSG00000186056	MATN1-AS1	2.29e-35
ENSG00000244198	AC004889.1	2.33e-35
ENSG00000229951	FLJ31356	4.55e-35
ENSG00000253210	AC040970.1	6.18e-35
ENSG00000224805	LINC00853	9.91e-35
ENSG00000234477	AC004231.1	1.38e-34
ENSG00000250608	AC010210.1	1.41e-34
ENSG00000230937	MIR205HG	2.71e-34
ENSG00000231187	AL356056.2	3.29e-34
ENSG00000245975	AC090515.2	7.54e-34
ENSG00000229893	AC005091.1	1.27e-33
ENSG00000226026	AC092802.1	1.32e-33
ENSG00000232692	AP001596.1	1.36e-33
ENSG00000224409	AC114489.1	1.5e-33
ENSG00000233901	LINC01503	1.99e-33
ENSG00000224818	AC096677.2	2.68e-33
ENSG00000240859	AC093627.4	2.85e-33
ENSG00000271327	AC010201.2	4.97e-33
ENSG00000254951	AC044810.2	8.76e-33
ENSG00000237852	AC119800.1	1.36e-32
ENSG00000204055	AL158151.1	1.72e-32
ENSG00000234584	AC019186.1	2.25e-32
ENSG00000223685	LINC00571	2.34e-32
ENSG00000234380	LINC01426	3e-32
ENSG00000225506	CYP4A22-AS1	4.49e-32
ENSG00000247934	AC022364.1	4.66e-32
ENSG00000254286	AC083923.2	6.13e-32
ENSG00000272953	AC092171.4	7.87e-32
ENSG00000248429	FAM198B-AS1	8.11e-32
ENSG00000225764	P3H2-AS1	8.21e-32
ENSG00000266958	AC005779.1	1.52e-31
ENSG00000266947	AC022916.1	1.59e-31
ENSG00000254670	AC084859.1	2.05e-31
ENSG00000224251	AL391427.1	2.05e-31
ENSG00000268707	AL158151.4	2.29e-31
ENSG00000214708	AC116407.1	5.89e-31
ENSG00000259275	AC087477.2	6.44e-31
ENSG00000204528	PSORS1C3	1.3e-30
ENSG00000233621	LINC01137	1.35e-30
ENSG00000175147	TMEM51-AS1	1.43e-30
ENSG00000272913	AC009237.14	3.54e-30
ENSG00000253666	AP000424.1	3.74e-30
ENSG00000231106	LINC01436	3.78e-30
ENSG00000271156	AC090578.1	3.79e-30
ENSG00000258586	LINC02274	4.44e-30
ENSG00000253671	AC027117.1	4.66e-30
ENSG00000228917	AL591806.1	8.22e-30
ENSG00000267082	AC011472.1	1.35e-29
ENSG00000273443	AL645608.9	1.63e-29
ENSG00000260160	AC011468.1	1.8e-29
ENSG00000251179	TMEM92-AS1	2.74e-29
ENSG00000234899	SOX9-AS1	2.89e-29
ENSG00000204054	LINC00963	3.05e-29
ENSG00000272695	GAS6-AS2	3.29e-29
ENSG00000253552	HOXA-AS2	3.31e-29
ENSG00000260552	AC023043.1	4.22e-29
ENSG00000256894	AC022509.3	5.66e-29
ENSG00000259342	AC025580.1	7.33e-29
ENSG00000230928	AL139241.1	1e-28
ENSG00000267078	AC015802.1	1.52e-28
ENSG00000249631	AC005699.1	1.98e-28
ENSG00000272088	AL512413.1	2.25e-28
ENSG00000205488	CALML3-AS1	2.7e-28
ENSG00000241599	AL627309.4	3.17e-28
ENSG00000258602	LINC01629	4.33e-28
ENSG00000203721	LINC00862	4.48e-28
ENSG00000235027	AC068580.3	4.75e-28
ENSG00000229017	LINC01277	4.81e-28
ENSG00000225330	AF064860.1	5.7e-28
ENSG00000244675	AC108676.1	6.85e-28
ENSG00000236242	MYO16-AS1	8.67e-28
ENSG00000272944	AC079834.2	1.32e-27
ENSG00000225535	LINC01393	1.67e-27
ENSG00000225886	AL445490.1	2.02e-27
ENSG00000232949	AC002480.3	2.08e-27
ENSG00000272734	ADIRF-AS1	2.43e-27
ENSG00000228791	THRB-AS1	2.87e-27
ENSG00000214922	HLA-F-AS1	3.97e-27
ENSG00000232679	LINC01705	6.87e-27
ENSG00000272341	AL137003.2	1.11e-26
ENSG00000240006	LINC02004	1.74e-26
ENSG00000244541	LINC01213	1.97e-26
ENSG00000250786	SNHG18	2.13e-26
ENSG00000269729	AC006262.2	2.13e-26
ENSG00000255847	AP003717.1	3.11e-26
ENSG00000267446	AC003070.2	3.48e-26
ENSG00000271874	AC025754.2	4.04e-26
ENSG00000247317	AC105202.1	5.41e-26
ENSG00000271857	AL096865.1	1.07e-25
ENSG00000259605	AC074212.1	1.08e-25
ENSG00000259370	AC103740.1	1.55e-25
ENSG00000273113	AC133528.1	1.6e-25
ENSG00000244041	LINC01011	2.31e-25
ENSG00000212743	AL137145.1	2.7e-25
ENSG00000260992	DOCK9-AS2	3.08e-25
ENSG00000264448	AC084346.2	3.09e-25
ENSG00000271983	AC023302.1	3.37e-25
ENSG00000228812	LAMA5-AS1	3.58e-25
ENSG00000272323	AC026801.3	5.88e-25
ENSG00000258410	AC087386.1	6.31e-25
ENSG00000262903	AC027796.4	6.38e-25
ENSG00000265478	AC107982.3	6.86e-25
ENSG00000226944	AL031847.1	7.01e-25
ENSG00000254632	AP003119.1	1.02e-24
ENSG00000272755	AC245297.2	1.02e-24
ENSG00000257042	AC008011.2	1.25e-24
ENSG00000238120	LINC01589	1.28e-24
ENSG00000255100	AP003119.2	1.32e-24
ENSG00000257556	LINC02298	1.5e-24
ENSG00000255364	SMILR	2.7e-24
ENSG00000263293	THCAT158	2.79e-24
ENSG00000233030	AC243772.2	3.79e-24
ENSG00000268287	AC008687.3	4.02e-24
ENSG00000189238	LINC00943	4.33e-24
ENSG00000257322	AC138123.2	4.33e-24
ENSG00000235831	BHLHE40-AS1	5.12e-24
ENSG00000116883	AL591845.1	5.49e-24
ENSG00000224259	LINC01133	7.23e-24
ENSG00000260118	AL157700.1	9.4e-24
ENSG00000240050	AL590542.1	1.08e-23
ENSG00000250320	AC113383.1	2.04e-23
ENSG00000273474	AL157392.4	2.59e-23
ENSG00000253944	AC027117.2	3.12e-23
ENSG00000260989	AL133297.2	3.12e-23
ENSG00000257137	C12orf80	3.5e-23
ENSG00000204362	AL590644.1	3.94e-23
ENSG00000235865	GSN-AS1	3.94e-23
ENSG00000235146	AC114498.1	4.08e-23
ENSG00000229931	AL137003.1	4.59e-23
ENSG00000265888	DSCAS	6.89e-23
ENSG00000272123	AC008966.2	7.85e-23
ENSG00000271200	AC099791.2	8.24e-23
ENSG00000227908	FLJ31104	8.7e-23
ENSG00000259732	AC092757.2	1.15e-22
ENSG00000271926	AC008972.1	1.28e-22
ENSG00000254847	AC009806.1	1.34e-22
ENSG00000272512	AL645608.8	1.4e-22
ENSG00000245532	NEAT1	1.54e-22
ENSG00000232295	AL589935.1	1.54e-22
ENSG00000245648	AC022075.1	1.59e-22
ENSG00000272138	LINC01607	1.69e-22
ENSG00000224307	AL161785.1	2.02e-22
ENSG00000248787	AC092903.2	2.23e-22
ENSG00000261040	WFDC21P	2.34e-22
ENSG00000248027	AP001351.1	2.5e-22
ENSG00000215244	AL137145.2	4.6e-22
ENSG00000272563	AC016745.2	5.03e-22
ENSG00000246640	PICART1	6.67e-22
ENSG00000266010	GATA6-AS1	6.86e-22
ENSG00000266258	LINC01909	7.28e-22
ENSG00000257261	AC008014.1	7.96e-22
ENSG00000249852	AC145676.1	1.11e-21
ENSG00000227053	AC105446.1	1.14e-21
ENSG00000245573	BDNF-AS	1.63e-21
ENSG00000258279	LINC00592	1.95e-21
ENSG00000270504	AL391422.3	2.06e-21
ENSG00000261889	AC108134.2	2.14e-21
ENSG00000146666	LINC00525	2.68e-21
ENSG00000227954	TARID	2.68e-21
ENSG00000248211	TRPC7-AS1	3.62e-21
ENSG00000237892	KLF7-IT1	4.24e-21
ENSG00000260604	AL590004.4	5.52e-21
ENSG00000225431	LINC01671	6.51e-21
ENSG00000260641	AC114811.2	6.85e-21
ENSG00000250509	AC034213.1	1.07e-20
ENSG00000259038	AL121820.2	1.27e-20
ENSG00000247157	LINC01252	1.27e-20
ENSG00000241288	AC092902.2	1.61e-20
ENSG00000267365	KCNJ2-AS1	2.34e-20
ENSG00000267288	AC138150.2	2.75e-20
ENSG00000238279	BX470102.1	3.16e-20
ENSG00000260971	AC119674.1	3.35e-20
ENSG00000261618	AC083837.1	3.95e-20
ENSG00000231107	LINC01508	4.54e-20
ENSG00000259341	AC015660.1	4.66e-20
ENSG00000236882	LINC01554	4.69e-20
ENSG00000224794	AL022326.1	6.66e-20
ENSG00000259604	AC015712.4	7.23e-20
ENSG00000271943	AC098614.4	8.91e-20
ENSG00000227199	ST7-AS1	1.33e-19
ENSG00000249899	AC025180.1	1.37e-19
ENSG00000226332	AL354836.1	1.79e-19
ENSG00000254842	LINC02551	1.79e-19
ENSG00000261051	AC107021.2	1.84e-19
ENSG00000257058	AP001363.2	2.11e-19
ENSG00000270640	AC104695.3	2.23e-19
ENSG00000257894	AC027288.3	2.24e-19
ENSG00000230939	AL591475.1	2.52e-19
ENSG00000257038	AP002761.3	2.83e-19
ENSG00000224939	LINC00184	3.15e-19
ENSG00000248599	FLJ42969	3.18e-19
ENSG00000260088	AL445483.1	3.43e-19
ENSG00000235978	AC018816.1	3.72e-19
ENSG00000273033	LINC02035	6.41e-19
ENSG00000238142	BX284668.5	6.85e-19
ENSG00000263680	AC007639.1	7.87e-19
ENSG00000230623	AC104461.1	8.11e-19
ENSG00000255471	AP001528.2	9.12e-19
ENSG00000262454	MIR193BHG	1.14e-18
ENSG00000259146	AC005476.2	1.27e-18
ENSG00000260941	LINC00622	1.43e-18
ENSG00000234997	AC016745.1	1.71e-18
ENSG00000270179	AP002840.2	1.83e-18
ENSG00000232415	AC005056.1	1.92e-18
ENSG00000257433	AC004241.1	2.52e-18
ENSG00000244479	OR2A1-AS1	2.69e-18
ENSG00000272564	AC012511.1	2.88e-18
ENSG00000225177	AL590617.2	3.01e-18
ENSG00000261243	AC022165.1	3.65e-18
ENSG00000270557	AC013731.1	3.76e-18
ENSG00000251095	AC097478.1	5.44e-18
ENSG00000260077	AC104794.2	7.97e-18
ENSG00000235899	LINC01564	9.74e-18
ENSG00000244128	LINC01322	9.88e-18
ENSG00000236601	AL732372.1	9.88e-18
ENSG00000254680	AC079329.1	1.02e-17
ENSG00000232194	Z99943.1	1.18e-17
ENSG00000229950	TFAP2A-AS1	1.53e-17
ENSG00000184809	B3GALT5-AS1	1.94e-17
ENSG00000251152	AC025539.1	2.03e-17
ENSG00000259354	AC025580.2	2.2e-17
ENSG00000268812	AC004264.1	2.25e-17
ENSG00000257859	CASC18	3.1e-17
ENSG00000185168	LINC00482	3.17e-17
ENSG00000255250	AP003059.2	3.28e-17
ENSG00000248187	AC078850.1	3.7e-17
ENSG00000234199	LINC01191	3.92e-17
ENSG00000247081	BAALC-AS1	5.07e-17
ENSG00000263011	AC108134.4	5.61e-17
ENSG00000257925	AC008083.1	6.61e-17
ENSG00000234235	BOK-AS1	6.94e-17
ENSG00000237886	NALT1	7.64e-17
ENSG00000231131	LINC01468	8.63e-17
ENSG00000259062	ACTN1-AS1	9.24e-17
ENSG00000257298	AC008147.2	1.29e-16
ENSG00000249267	LINC00939	1.29e-16
ENSG00000215039	CD27-AS1	1.43e-16
ENSG00000226334	AL359182.1	1.97e-16
ENSG00000232480	TGFB2-AS1	2.44e-16
ENSG00000205334	LINC01460	2.62e-16
ENSG00000260032	NORAD	3.12e-16
ENSG00000231742	LINC01273	3.21e-16
ENSG00000232110	AL353751.1	3.29e-16
ENSG00000231711	LINC00899	3.99e-16
ENSG00000259645	AC027237.4	4.32e-16
ENSG00000272551	AC017048.3	4.94e-16
ENSG00000267504	AC090236.2	5.34e-16
ENSG00000268108	AC008687.2	6.45e-16
ENSG00000227210	AC079145.1	8.81e-16
ENSG00000273084	AC092171.5	8.92e-16
ENSG00000253227	AC090192.2	1.22e-15
ENSG00000253438	PCAT1	1.22e-15
ENSG00000213994	AL157395.1	1.49e-15
ENSG00000240032	LNCSRLR	1.73e-15
ENSG00000229021	AL450992.1	2.1e-15
ENSG00000261729	AL133383.1	2.13e-15
ENSG00000234362	LINC01914	3.47e-15
ENSG00000272293	AC083964.1	3.5e-15
ENSG00000261379	AC010735.1	4.23e-15
ENSG00000260366	AC026803.1	4.72e-15
ENSG00000230479	AP000695.1	7.48e-15
ENSG00000265055	AC145343.1	7.65e-15
ENSG00000259649	AC027808.2	1.11e-14
ENSG00000224057	EGFR-AS1	1.48e-14
ENSG00000258789	AL162171.1	1.96e-14
ENSG00000259584	AC021755.3	2.23e-14
ENSG00000254109	RBPMS-AS1	2.43e-14
ENSG00000237772	AC092620.1	2.57e-14
ENSG00000261512	AC092368.3	2.64e-14
ENSG00000254837	AP001372.2	3.42e-14
ENSG00000266283	AC091588.3	3.45e-14
ENSG00000267737	AC087645.2	3.47e-14
ENSG00000273264	AL360219.1	4.32e-14
ENSG00000099869	IGF2-AS	4.46e-14
ENSG00000223725	AC009226.1	4.54e-14
ENSG00000266903	AC243964.2	4.55e-14
ENSG00000229873	OGFR-AS1	5.07e-14
ENSG00000237596	AL138828.1	5.57e-14
ENSG00000248538	AC022784.1	7.19e-14
ENSG00000263718	SEPTIN9-DT	7.36e-14
ENSG00000226310	AL022157.1	8.03e-14
ENSG00000198221	AFDN-AS1	9.4e-14
ENSG00000261068	AL512274.1	1.15e-13
ENSG00000261122	LINC02167	1.21e-13
ENSG00000254554	AC080023.1	2.07e-13
ENSG00000264107	AC138207.2	2.2e-13
ENSG00000253161	LINC01605	3.98e-13
ENSG00000243415	AC107021.1	4.13e-13
ENSG00000259498	AC079328.2	4.49e-13
ENSG00000225302	AC023283.1	5.35e-13
ENSG00000228208	C1orf143	5.99e-13
ENSG00000242861	AL591895.1	6.19e-13
ENSG00000269915	AP006621.4	6.55e-13
ENSG00000230084	AC006059.1	6.96e-13
ENSG00000272666	U62317.2	1.03e-12
ENSG00000232973	CYP1B1-AS1	1.18e-12
ENSG00000232536	AL365436.2	1.23e-12
ENSG00000233237	LINC00472	1.26e-12
ENSG00000238260	AL513320.1	1.37e-12
ENSG00000261334	AL353803.4	1.43e-12
ENSG00000271324	AC112220.3	1.48e-12
ENSG00000236345	AL354719.2	1.5e-12
ENSG00000254300	LINC01111	1.7e-12
ENSG00000265519	AC015922.3	2.43e-12
ENSG00000260401	AP002761.4	2.83e-12
ENSG00000267519	AC020916.1	3.22e-12
ENSG00000238290	AL034417.2	3.3e-12
ENSG00000224945	AL353150.1	3.3e-12
ENSG00000237781	AL356356.1	3.33e-12
ENSG00000232850	PTGES2-AS1	3.79e-12
ENSG00000233077	LINC01271	3.95e-12
ENSG00000231172	AC007099.1	4.13e-12
ENSG00000250551	MIR583HG	4.65e-12
ENSG00000272081	AC008972.2	4.79e-12
ENSG00000250548	AL355916.1	4.84e-12
ENSG00000271825	AC019080.3	5.83e-12
ENSG00000260633	AC010207.1	6.33e-12
ENSG00000254862	AC100771.2	6.44e-12
ENSG00000257830	AC021066.1	7.01e-12
ENSG00000204709	LINC01556	8.31e-12
ENSG00000235277	AF127577.3	1.06e-11
ENSG00000266970	AC061992.1	1.1e-11
ENSG00000237773	AC003075.1	1.14e-11
ENSG00000248846	LINC02065	1.21e-11
ENSG00000272862	AC106052.1	1.29e-11
ENSG00000177335	C8orf31	1.57e-11
ENSG00000258689	LINC01269	1.62e-11
ENSG00000255874	LINC00346	1.96e-11
ENSG00000260239	LINC02533	2.21e-11
ENSG00000272465	AL031768.1	2.85e-11
ENSG00000226149	AL356124.1	3.69e-11
ENSG00000231160	KLF3-AS1	3.81e-11
ENSG00000260228	AC009119.1	3.87e-11
ENSG00000233818	AP000695.2	5.34e-11
ENSG00000273138	AC005021.1	5.75e-11
ENSG00000257671	KRT7-AS	5.76e-11
ENSG00000206532	AC117402.1	6.1e-11
ENSG00000230825	AC005532.1	6.26e-11
ENSG00000258457	AL132780.2	8.4e-11
ENSG00000229647	MYOSLID	9.25e-11
ENSG00000269895	AP000654.1	9.25e-11

## Sheet: Supplementary file 1c
Supplementary file 1c: Reannotation of co-essential modules using cancer Hallmark gene set enrichment analysis. Genes in the individual modules can be obtained from PubMed ID: 33859415.												Mitra et al.
Module number	GeneSet	Description	P-value	FDR
176	HALLMARK_E2F_TARGETS	cell cycle progression: E2F targets	3.94689e-05	0.00197345
184	HALLMARK_PROTEIN_SECRETION	protein secretion	6.35821e-05	0.00317911
184	HALLMARK_HEME_METABOLISM	heme metabolism and erythroid lineage	0.00104067	0.0260169
192	HALLMARK_OXIDATIVE_PHOSPHORYLATION	oxidative phosphorylation and citric acid cycle	0	0
195	HALLMARK_HYPOXIA	response to hypoxia; HIF1A targets	0.000876253	0.0219063
195	HALLMARK_MTORC1_SIGNALING	mTORC1 signaling	0.000876253	0.0219063
197	HALLMARK_MYC_TARGETS_V1	MYC targets, variant 1	3.98808e-08	1.99404e-06
222	HALLMARK_OXIDATIVE_PHOSPHORYLATION	oxidative phosphorylation and citric acid cycle	1.8089e-05	0.00090445
222	HALLMARK_FATTY_ACID_METABOLISM	fatty acid metabolism	0.000191804	0.0047951
222	HALLMARK_GLYCOLYSIS	glycolysis and gluconeogenesis	0.000841	0.0140167
223	HALLMARK_MYC_TARGETS_V1	MYC targets, variant 1	0	0
223	HALLMARK_E2F_TARGETS	cell cycle progression: E2F targets	1.61046e-05	0.000402615
223	HALLMARK_G2M_CHECKPOINT	cell cycle progression: G2/M checkpoint	0.000101058	0.00131326
223	HALLMARK_MTORC1_SIGNALING	mTORC1 signaling	0.000105061	0.00131326
226	HALLMARK_MYC_TARGETS_V1	MYC targets, variant 1	1.82926e-10	9.14631e-09
226	HALLMARK_E2F_TARGETS	cell cycle progression: E2F targets	9.08862e-06	0.000227215
226	HALLMARK_G2M_CHECKPOINT	cell cycle progression: G2/M checkpoint	0.000699401	0.0116567
233	HALLMARK_UV_RESPONSE_DN	UV response: downregulated genes	7.90967e-06	0.000395483
256	HALLMARK_OXIDATIVE_PHOSPHORYLATION	oxidative phosphorylation and citric acid cycle	0	0
256	HALLMARK_ADIPOGENESIS	adipocyte development	8.25114e-06	0.000206278
262	HALLMARK_CHOLESTEROL_HOMEOSTASIS	cholesterol homeostasis	1.03263e-11	5.16315e-10
268	HALLMARK_E2F_TARGETS	cell cycle progression: E2F targets	0.000443679	0.022184
270	HALLMARK_HYPOXIA	response to hypoxia; HIF1A targets	0.000132527	0.00331318
270	HALLMARK_MTORC1_SIGNALING	mTORC1 signaling	0.000132527	0.00331318
280	HALLMARK_P53_PATHWAY	p53 pathway	0.000699679	0.0178288
280	HALLMARK_E2F_TARGETS	cell cycle progression: E2F targets	0.000713153	0.0178288
283	HALLMARK_G2M_CHECKPOINT	cell cycle progression: G2/M checkpoint	5.50902e-08	2.75451e-06
283	HALLMARK_WNT_BETA_CATENIN_SIGNALING	canonical beta catenin pathway	0.00182874	0.0457185
297	HALLMARK_G2M_CHECKPOINT	cell cycle progression: G2/M checkpoint	0.000863415	0.0431707
302	HALLMARK_TGF_BETA_SIGNALING	TGF beta signaling	1.48548e-13	7.42739e-12
302	HALLMARK_UV_RESPONSE_DN	UV response: downregulated genes	0.000451567	0.0112892
303	HALLMARK_TGF_BETA_SIGNALING	TGF beta signaling	1.73033e-10	8.65165e-09
303	HALLMARK_UV_RESPONSE_DN	UV response: downregulated genes	8.24694e-05	0.00206174
305	HALLMARK_TGF_BETA_SIGNALING	TGF beta signaling	4.24462e-09	2.12231e-07
305	HALLMARK_UV_RESPONSE_DN	UV response: downregulated genes	0.000635694	0.0158924
307	HALLMARK_NOTCH_SIGNALING	Notch signaling	1.85555e-08	9.27773e-07
307	HALLMARK_WNT_BETA_CATENIN_SIGNALING	canonical beta catenin pathway	7.71915e-08	1.92979e-06
318	HALLMARK_INTERFERON_GAMMA_RESPONSE	interferon gamma response	2.85222e-09	1.35298e-07
318	HALLMARK_IL6_JAK_STAT3_SIGNALING	IL6 STAT3 signaling during acute phase response	5.41193e-09	1.35298e-07
318	HALLMARK_INTERFERON_ALPHA_RESPONSE	interferon alpha response	1.17058e-08	1.95097e-07
329	HALLMARK_E2F_TARGETS	cell cycle progression: E2F targets	0.000255597	0.0127798
345	HALLMARK_PROTEIN_SECRETION	protein secretion	1.06637e-06	5.33185e-05
354	HALLMARK_MITOTIC_SPINDLE	cell cycle progression: mitotic spindle assembly	1.51671e-06	7.58355e-05
366	HALLMARK_INTERFERON_GAMMA_RESPONSE	interferon gamma response	0.000269758	0.0134879
367	HALLMARK_MYC_TARGETS_V2	MYC targets, variant 2	1.86389e-06	9.31947e-05
367	HALLMARK_UNFOLDED_PROTEIN_RESPONSE	unfolded protein response; ER stress	0.000852031	0.0213008
383	HALLMARK_PI3K_AKT_MTOR_SIGNALING	PI3K signaling via AKT to mTORC1	0.000254106	0.0127053
386	HALLMARK_UNFOLDED_PROTEIN_RESPONSE	unfolded protein response; ER stress	1.38539e-05	0.000692694
392	HALLMARK_UNFOLDED_PROTEIN_RESPONSE	unfolded protein response; ER stress	0.000120547	0.00602736
394	HALLMARK_COMPLEMENT	complement cascade	0.000876253	0.0438127
397	HALLMARK_IL6_JAK_STAT3_SIGNALING	IL6 STAT3 signaling during acute phase response	0.000250164	0.0109234
397	HALLMARK_PI3K_AKT_MTOR_SIGNALING	PI3K signaling via AKT to mTORC1	0.000436938	0.0109234
403	HALLMARK_E2F_TARGETS	cell cycle progression: E2F targets	0.000132527	0.00662637
405	HALLMARK_ANDROGEN_RESPONSE	androgen response	0.000389514	0.0194757
454	HALLMARK_PROTEIN_SECRETION	protein secretion	9.8867e-05	0.00494335
462	HALLMARK_APICAL_JUNCTION	apical junction complex consisting of adherens and tight junctions	6.17715e-06	0.000308858
462	HALLMARK_TGF_BETA_SIGNALING	TGF beta signaling	0.000360346	0.00900866
471	HALLMARK_APICAL_JUNCTION	apical junction complex consisting of adherens and tight junctions	4.58821e-05	0.00229411
471	HALLMARK_MITOTIC_SPINDLE	cell cycle progression: mitotic spindle assembly	0.000546032	0.0136508
474	HALLMARK_E2F_TARGETS	cell cycle progression: E2F targets	0.000362719	0.0181359
479	HALLMARK_MYC_TARGETS_V1	MYC targets, variant 1	4.09628e-12	2.04814e-10
479	HALLMARK_MTORC1_SIGNALING	mTORC1 signaling	0.000567195	0.0141799
479	HALLMARK_UNFOLDED_PROTEIN_RESPONSE	unfolded protein response; ER stress	0.00299501	0.0492794
479	HALLMARK_E2F_TARGETS	cell cycle progression: E2F targets	0.00394235	0.0492794
492	HALLMARK_MITOTIC_SPINDLE	cell cycle progression: mitotic spindle assembly	5.89023e-05	0.00294511
505	HALLMARK_E2F_TARGETS	cell cycle progression: E2F targets	0.000876253	0.0438127
507	HALLMARK_MITOTIC_SPINDLE	cell cycle progression: mitotic spindle assembly	2.04928e-05	0.00102464
507	HALLMARK_E2F_TARGETS	cell cycle progression: E2F targets	0.000443679	0.011092
518	HALLMARK_DNA_REPAIR	DNA repair	0.000361465	0.0180142
518	HALLMARK_G2M_CHECKPOINT	cell cycle progression: G2/M checkpoint	0.00106063	0.0180142
518	HALLMARK_E2F_TARGETS	cell cycle progression: E2F targets	0.00108085	0.0180142
519	HALLMARK_PANCREAS_BETA_CELLS	genes specific to pancreatic beta cells	2.09509e-05	0.00104755
528	HALLMARK_APOPTOSIS	programmed cell death; caspase pathway	3.23173e-06	0.000161587
533	HALLMARK_NOTCH_SIGNALING	Notch signaling	9.64394e-05	0.00482197
533	HALLMARK_WNT_BETA_CATENIN_SIGNALING	canonical beta catenin pathway	0.000219407	0.00548517
534	HALLMARK_OXIDATIVE_PHOSPHORYLATION	oxidative phosphorylation and citric acid cycle	1.74107e-08	8.70536e-07
534	HALLMARK_PROTEIN_SECRETION	protein secretion	0.000133184	0.00332961
534	HALLMARK_UV_RESPONSE_UP	UV response: upregulated genes	0.000903372	0.0150562
543	HALLMARK_G2M_CHECKPOINT	cell cycle progression: G2/M checkpoint	0.000357342	0.0178671
544	HALLMARK_MYC_TARGETS_V1	MYC targets, variant 1	6.96845e-05	0.00348423
549	HALLMARK_INTERFERON_ALPHA_RESPONSE	interferon alpha response	5.64511e-07	2.82255e-05
551	HALLMARK_GLYCOLYSIS	glycolysis and gluconeogenesis	1.27869e-08	6.39343e-07
551	HALLMARK_HYPOXIA	response to hypoxia; HIF1A targets	0.000745115	0.0186279
559	HALLMARK_MYC_TARGETS_V1	MYC targets, variant 1	2.85222e-09	1.42611e-07
560	HALLMARK_E2F_TARGETS	cell cycle progression: E2F targets	0.000443679	0.022184
572	HALLMARK_TNFA_SIGNALING_VIA_NFKB	TNFA signaling via NF_B	4.58821e-05	0.00229411
577	HALLMARK_UNFOLDED_PROTEIN_RESPONSE	unfolded protein response; ER stress	6.05794e-06	0.000302897
580	HALLMARK_PI3K_AKT_MTOR_SIGNALING	PI3K signaling via AKT to mTORC1	1.21341e-05	0.000606707
580	HALLMARK_INTERFERON_GAMMA_RESPONSE	interferon gamma response	0.00294232	0.0490386
580	HALLMARK_ALLOGRAFT_REJECTION	allograft rejection	0.00294232	0.0490386
581	HALLMARK_G2M_CHECKPOINT	cell cycle progression: G2/M checkpoint	6.58773e-10	1.71483e-08
581	HALLMARK_MITOTIC_SPINDLE	cell cycle progression: mitotic spindle assembly	6.85932e-10	1.71483e-08
581	HALLMARK_E2F_TARGETS	cell cycle progression: E2F targets	1.51671e-06	2.52785e-05
584	HALLMARK_UNFOLDED_PROTEIN_RESPONSE	unfolded protein response; ER stress	1.38539e-05	0.000692694
584	HALLMARK_MYC_TARGETS_V2	MYC targets, variant 2	7.43012e-05	0.00185753
595	HALLMARK_P53_PATHWAY	p53 pathway	0.000250674	0.00638991
595	HALLMARK_E2F_TARGETS	cell cycle progression: E2F targets	0.000255597	0.00638991
640	HALLMARK_E2F_TARGETS	cell cycle progression: E2F targets	0.000876253	0.0438127
642	HALLMARK_OXIDATIVE_PHOSPHORYLATION	oxidative phosphorylation and citric acid cycle	6.17715e-06	0.000308858
642	HALLMARK_ADIPOGENESIS	adipocyte development	0.00156375	0.0390938
715	HALLMARK_MYC_TARGETS_V1	MYC targets, variant 1	9.21485e-14	4.60743e-12
725	HALLMARK_MYC_TARGETS_V1	MYC targets, variant 1	1.51671e-06	7.58355e-05
725	HALLMARK_E2F_TARGETS	cell cycle progression: E2F targets	0.000713153	0.0178288
726	HALLMARK_E2F_TARGETS	cell cycle progression: E2F targets	0.000876253	0.0438127
739	HALLMARK_IL6_JAK_STAT3_SIGNALING	IL6 STAT3 signaling during acute phase response	2.9333e-09	1.46665e-07
739	HALLMARK_INTERFERON_GAMMA_RESPONSE	interferon gamma response	3.90416e-08	9.76041e-07
739	HALLMARK_INTERFERON_ALPHA_RESPONSE	interferon alpha response	2.62959e-07	4.38265e-06
752	HALLMARK_G2M_CHECKPOINT	cell cycle progression: G2/M checkpoint	3.11709e-06	0.000155854
752	HALLMARK_E2F_TARGETS	cell cycle progression: E2F targets	0.00108085	0.0270212
755	HALLMARK_E2F_TARGETS	cell cycle progression: E2F targets	9.45826e-06	0.000472913
755	HALLMARK_DNA_REPAIR	DNA repair	0.00194258	0.0485646
757	HALLMARK_E2F_TARGETS	cell cycle progression: E2F targets	0.00156375	0.0390938
757	HALLMARK_MYC_TARGETS_V1	MYC targets, variant 1	0.00156375	0.0390938
779	HALLMARK_MYC_TARGETS_V1	MYC targets, variant 1	3.77476e-15	1.88738e-13
779	HALLMARK_E2F_TARGETS	cell cycle progression: E2F targets	2.31941e-05	0.000579853
779	HALLMARK_G2M_CHECKPOINT	cell cycle progression: G2/M checkpoint	0.00132746	0.0221243
787	HALLMARK_G2M_CHECKPOINT	cell cycle progression: G2/M checkpoint	1.99593e-05	0.000997963
794	HALLMARK_UNFOLDED_PROTEIN_RESPONSE	unfolded protein response; ER stress	2.71567e-05	0.00135784
795	HALLMARK_MYC_TARGETS_V2	MYC targets, variant 2	2.03055e-09	1.01527e-07
799	HALLMARK_E2F_TARGETS	cell cycle progression: E2F targets	9.38477e-05	0.00469238
836	HALLMARK_MYC_TARGETS_V1	MYC targets, variant 1	2.53131e-14	1.26565e-12
868	HALLMARK_MYC_TARGETS_V1	MYC targets, variant 1	4.09628e-12	2.04814e-10
921	HALLMARK_PI3K_AKT_MTOR_SIGNALING	PI3K signaling via AKT to mTORC1	7.95153e-06	0.000397577
935	HALLMARK_MYC_TARGETS_V1	MYC targets, variant 1	0.000255597	0.0127798
947	HALLMARK_UNFOLDED_PROTEIN_RESPONSE	unfolded protein response; ER stress	6.56585e-05	0.00328292
952	HALLMARK_MYC_TARGETS_V1	MYC targets, variant 1	7.77556e-11	3.88778e-09
958	HALLMARK_MYC_TARGETS_V2	MYC targets, variant 2	0.000512691	0.0256346
969	HALLMARK_TNFA_SIGNALING_VIA_NFKB	TNFA signaling via NF_B	5.67824e-08	2.83912e-06
976	HALLMARK_MYC_TARGETS_V2	MYC targets, variant 2	1.37156e-07	6.85778e-06
993	HALLMARK_OXIDATIVE_PHOSPHORYLATION	oxidative phosphorylation and citric acid cycle	2.43307e-07	1.21653e-05
1004	HALLMARK_UNFOLDED_PROTEIN_RESPONSE	unfolded protein response; ER stress	7.82652e-05	0.00391326
1004	HALLMARK_MTORC1_SIGNALING	mTORC1 signaling	0.000713153	0.0178288
1006	HALLMARK_MYC_TARGETS_V2	MYC targets, variant 2	0.000512691	0.0256346
1007	HALLMARK_PI3K_AKT_MTOR_SIGNALING	PI3K signaling via AKT to mTORC1	2.0282e-05	0.0010141
1007	HALLMARK_COMPLEMENT	complement cascade	0.000255597	0.00638991
1013	HALLMARK_G2M_CHECKPOINT	cell cycle progression: G2/M checkpoint	3.8509e-08	1.92545e-06
1033	HALLMARK_UNFOLDED_PROTEIN_RESPONSE	unfolded protein response; ER stress	0.000852031	0.0426015
1036	HALLMARK_MYC_TARGETS_V1	MYC targets, variant 1	4.21885e-15	2.10942e-13
1036	HALLMARK_E2F_TARGETS	cell cycle progression: E2F targets	0.000567195	0.0141799
1039	HALLMARK_MYC_TARGETS_V1	MYC targets, variant 1	9.45826e-06	0.000472913
1067	HALLMARK_OXIDATIVE_PHOSPHORYLATION	oxidative phosphorylation and citric acid cycle	0.000362719	0.0181359
1105	HALLMARK_MYC_TARGETS_V1	MYC targets, variant 1	1.60732e-10	8.03659e-09
1105	HALLMARK_MTORC1_SIGNALING	mTORC1 signaling	0.00166891	0.0417228
1126	HALLMARK_PI3K_AKT_MTOR_SIGNALING	PI3K signaling via AKT to mTORC1	0.000129309	0.00646543
1126	HALLMARK_COMPLEMENT	complement cascade	0.000876253	0.0219063
1132	HALLMARK_UV_RESPONSE_DN	UV response: downregulated genes	0.000201706	0.0100853
1168	HALLMARK_MYC_TARGETS_V1	MYC targets, variant 1	6.96845e-05	0.00348423
1187	HALLMARK_G2M_CHECKPOINT	cell cycle progression: G2/M checkpoint	1.06585e-06	5.32924e-05
1187	HALLMARK_WNT_BETA_CATENIN_SIGNALING	canonical beta catenin pathway	0.00131423	0.0328557
1194	HALLMARK_DNA_REPAIR	DNA repair	0.000729892	0.0364946
1196	HALLMARK_IL6_JAK_STAT3_SIGNALING	IL6 STAT3 signaling during acute phase response	1.15895e-06	5.79473e-05
1196	HALLMARK_INTERFERON_GAMMA_RESPONSE	interferon gamma response	0.00108085	0.0270212
1201	HALLMARK_P53_PATHWAY	p53 pathway	0.000435216	0.011092
1201	HALLMARK_E2F_TARGETS	cell cycle progression: E2F targets	0.000443679	0.011092
1225	HALLMARK_DNA_REPAIR	DNA repair	0.000374346	0.0187173
1226	HALLMARK_DNA_REPAIR	DNA repair	1.88001e-05	0.000940003
1288	HALLMARK_INTERFERON_ALPHA_RESPONSE	interferon alpha response	0.000485505	0.0242753
1303	HALLMARK_MYC_TARGETS_V1	MYC targets, variant 1	2.04928e-05	0.00102464
1303	HALLMARK_E2F_TARGETS	cell cycle progression: E2F targets	0.000443679	0.011092
1325	HALLMARK_E2F_TARGETS	cell cycle progression: E2F targets	0.000713153	0.0178288
1325	HALLMARK_MYC_TARGETS_V1	MYC targets, variant 1	0.000713153	0.0178288
1339	HALLMARK_ANGIOGENESIS	blood vessel formation	0.00019606	0.00669256
1339	HALLMARK_WNT_BETA_CATENIN_SIGNALING	canonical beta catenin pathway	0.000267702	0.00669256
1360	HALLMARK_MITOTIC_SPINDLE	cell cycle progression: mitotic spindle assembly	2.04928e-05	0.00102464
1360	HALLMARK_E2F_TARGETS	cell cycle progression: E2F targets	0.000443679	0.011092
1399	HALLMARK_E2F_TARGETS	cell cycle progression: E2F targets	2.04928e-05	0.00102464
1420	HALLMARK_REACTIVE_OXIGEN_SPECIES_PATHWAY	reactive oxygen species pathway	1.2958e-05	0.0006479
1420	HALLMARK_MTORC1_SIGNALING	mTORC1 signaling	0.000876253	0.0219063
1424	HALLMARK_MYC_TARGETS_V1	MYC targets, variant 1	5.89023e-05	0.00294511
1440	HALLMARK_TNFA_SIGNALING_VIA_NFKB	TNFA signaling via NF_B	2.03627e-05	0.00101814
1442	HALLMARK_IL6_JAK_STAT3_SIGNALING	IL6 STAT3 signaling during acute phase response	0.000124906	0.0062453
1442	HALLMARK_INTERFERON_GAMMA_RESPONSE	interferon gamma response	0.000269758	0.00674394
1448	HALLMARK_E2F_TARGETS	cell cycle progression: E2F targets	2.87645e-09	1.43823e-07
1448	HALLMARK_MYC_TARGETS_V1	MYC targets, variant 1	9.45826e-06	0.000236457
1448	HALLMARK_MYC_TARGETS_V2	MYC targets, variant 2	0.000117764	0.00196273
1448	HALLMARK_G2M_CHECKPOINT	cell cycle progression: G2/M checkpoint	0.000250674	0.00313342
1463	HALLMARK_UNFOLDED_PROTEIN_RESPONSE	unfolded protein response; ER stress	1.38539e-05	0.000692694
1483	HALLMARK_HEME_METABOLISM	heme metabolism and erythroid lineage	0.000352017	0.0176008
1496	HALLMARK_E2F_TARGETS	cell cycle progression: E2F targets	2.04928e-05	0.00102464
1498	HALLMARK_G2M_CHECKPOINT	cell cycle progression: G2/M checkpoint	0.000863415	0.0219063
1498	HALLMARK_E2F_TARGETS	cell cycle progression: E2F targets	0.000876253	0.0219063
1500	HALLMARK_MYC_TARGETS_V1	MYC targets, variant 1	0.000876253	0.0438127
1501	HALLMARK_MYC_TARGETS_V1	MYC targets, variant 1	1.02141e-14	5.10703e-13
1502	HALLMARK_E2F_TARGETS	cell cycle progression: E2F targets	5.89023e-05	0.00294511
1502	HALLMARK_G2M_CHECKPOINT	cell cycle progression: G2/M checkpoint	0.00166908	0.0417271
1503	HALLMARK_MYC_TARGETS_V1	MYC targets, variant 1	2.22045e-16	1.11022e-14
1504	HALLMARK_PROTEIN_SECRETION	protein secretion	1.06637e-06	5.33185e-05
1515	HALLMARK_MYC_TARGETS_V1	MYC targets, variant 1	0.000255597	0.0127798
1526	HALLMARK_MYC_TARGETS_V2	MYC targets, variant 2	1.37156e-07	6.85778e-06
1528	HALLMARK_MYC_TARGETS_V2	MYC targets, variant 2	8.73602e-06	0.000436801
1551	HALLMARK_INTERFERON_ALPHA_RESPONSE	interferon alpha response	2.26252e-07	1.13126e-05
1569	HALLMARK_G2M_CHECKPOINT	cell cycle progression: G2/M checkpoint	1.99593e-05	0.000997963
1580	HALLMARK_MYC_TARGETS_V1	MYC targets, variant 1	1.54539e-07	7.72693e-06
1580	HALLMARK_E2F_TARGETS	cell cycle progression: E2F targets	0.000546032	0.0136508
1619	HALLMARK_P53_PATHWAY	p53 pathway	3.59274e-06	0.000179637
1619	HALLMARK_E2F_TARGETS	cell cycle progression: E2F targets	0.000132527	0.00331318
1639	HALLMARK_E2F_TARGETS	cell cycle progression: E2F targets	0.000876253	0.0438127
1655	HALLMARK_G2M_CHECKPOINT	cell cycle progression: G2/M checkpoint	1.84458e-07	9.22288e-06
1674	HALLMARK_MYC_TARGETS_V1	MYC targets, variant 1	2.53131e-14	1.26565e-12
1674	HALLMARK_MTORC1_SIGNALING	mTORC1 signaling	0.00263111	0.0438518
1674	HALLMARK_E2F_TARGETS	cell cycle progression: E2F targets	0.00263111	0.0438518
1675	HALLMARK_DNA_REPAIR	DNA repair	0.000729892	0.0364946
1683	HALLMARK_MYC_TARGETS_V1	MYC targets, variant 1	0.000362719	0.0181359
1696	HALLMARK_MITOTIC_SPINDLE	cell cycle progression: mitotic spindle assembly	0.000876253	0.0438127
1765	HALLMARK_MYC_TARGETS_V1	MYC targets, variant 1	5.42633e-12	2.71316e-10
1765	HALLMARK_MTORC1_SIGNALING	mTORC1 signaling	0.000190412	0.00476031
1765	HALLMARK_E2F_TARGETS	cell cycle progression: E2F targets	0.00166891	0.0278152
1779	HALLMARK_MYC_TARGETS_V1	MYC targets, variant 1	1.74107e-08	8.70536e-07
1779	HALLMARK_E2F_TARGETS	cell cycle progression: E2F targets	0.000180053	0.00450132
1781	HALLMARK_MITOTIC_SPINDLE	cell cycle progression: mitotic spindle assembly	0.000362719	0.0181359
1787	HALLMARK_MYC_TARGETS_V2	MYC targets, variant 2	2.20478e-06	0.000110239
1793	HALLMARK_PROTEIN_SECRETION	protein secretion	0.00140607	0.0486525
1793	HALLMARK_UNFOLDED_PROTEIN_RESPONSE	unfolded protein response; ER stress	0.0019461	0.0486525
1800	HALLMARK_MITOTIC_SPINDLE	cell cycle progression: mitotic spindle assembly	0.000876253	0.0438127
1826	HALLMARK_HYPOXIA	response to hypoxia; HIF1A targets	3.90416e-08	9.76041e-07
1826	HALLMARK_GLYCOLYSIS	glycolysis and gluconeogenesis	3.90416e-08	9.76041e-07
1826	HALLMARK_MTORC1_SIGNALING	mTORC1 signaling	9.74663e-07	1.62444e-05
1861	HALLMARK_APOPTOSIS	programmed cell death; caspase pathway	0.000898565	0.0361383
1861	HALLMARK_TNFA_SIGNALING_VIA_NFKB	TNFA signaling via NF_B	0.0016936	0.0361383
1861	HALLMARK_TGF_BETA_SIGNALING	TGF beta signaling	0.0021683	0.0361383
1869	HALLMARK_G2M_CHECKPOINT	cell cycle progression: G2/M checkpoint	0.000357342	0.00906797
1869	HALLMARK_MITOTIC_SPINDLE	cell cycle progression: mitotic spindle assembly	0.000362719	0.00906797
1870	HALLMARK_MYC_TARGETS_V1	MYC targets, variant 1	1.11022e-16	5.55112e-15
1872	HALLMARK_WNT_BETA_CATENIN_SIGNALING	canonical beta catenin pathway	0.000128286	0.00641429
1876	HALLMARK_PANCREAS_BETA_CELLS	genes specific to pancreatic beta cells	0.000799316	0.0399658
1926	HALLMARK_HEDGEHOG_SIGNALING	Hedgehog signaling	0.00039009	0.0195045
1929	HALLMARK_PROTEIN_SECRETION	protein secretion	1.06637e-06	5.33185e-05
1952	HALLMARK_OXIDATIVE_PHOSPHORYLATION	oxidative phosphorylation and citric acid cycle	0.000876253	0.0438127
1966	HALLMARK_APOPTOSIS	programmed cell death; caspase pathway	0.000461741	0.0230871
1986	HALLMARK_MYC_TARGETS_V1	MYC targets, variant 1	6.30612e-07	3.15306e-05
2002	HALLMARK_PROTEIN_SECRETION	protein secretion	6.35821e-05	0.00317911
2002	HALLMARK_HEME_METABOLISM	heme metabolism and erythroid lineage	0.00104067	0.0260169
2011	HALLMARK_MYC_TARGETS_V1	MYC targets, variant 1	0.000362719	0.0181359
2030	HALLMARK_MYC_TARGETS_V1	MYC targets, variant 1	0.000443679	0.022184
2067	HALLMARK_PROTEIN_SECRETION	protein secretion	9.8867e-05	0.00494335
2072	HALLMARK_OXIDATIVE_PHOSPHORYLATION	oxidative phosphorylation and citric acid cycle	3.91103e-09	1.95552e-07
2086	HALLMARK_MYC_TARGETS_V1	MYC targets, variant 1	2.03627e-05	0.00101814
2099	HALLMARK_PI3K_AKT_MTOR_SIGNALING	PI3K signaling via AKT to mTORC1	2.0282e-05	0.0010141
2104	HALLMARK_OXIDATIVE_PHOSPHORYLATION	oxidative phosphorylation and citric acid cycle	0	0
2104	HALLMARK_ADIPOGENESIS	adipocyte development	0.000841	0.021025
2108	HALLMARK_CHOLESTEROL_HOMEOSTASIS	cholesterol homeostasis	1.20189e-09	6.00945e-08
2109	HALLMARK_BILE_ACID_METABOLISM	biosynthesis of bile acids	6.09424e-12	3.04712e-10
2109	HALLMARK_PEROXISOME	peroxisomes	2.05877e-10	5.14693e-09
2123	HALLMARK_ANDROGEN_RESPONSE	androgen response	0.00052659	0.0263295
2138	HALLMARK_TGF_BETA_SIGNALING	TGF beta signaling	0.000444109	0.0222054
2139	HALLMARK_TGF_BETA_SIGNALING	TGF beta signaling	0.000444109	0.0222054
2144	HALLMARK_NOTCH_SIGNALING	Notch signaling	3.50899e-06	0.000175449
2144	HALLMARK_WNT_BETA_CATENIN_SIGNALING	canonical beta catenin pathway	0.000881513	0.0220378
2241	HALLMARK_XENOBIOTIC_METABOLISM	metabolism of xenobiotics	0.000362719	0.0181359
2243	HALLMARK_UNFOLDED_PROTEIN_RESPONSE	unfolded protein response; ER stress	1.67299e-05	0.000836497
2250	HALLMARK_HYPOXIA	response to hypoxia; HIF1A targets	3.68341e-06	6.13902e-05
2250	HALLMARK_MTORC1_SIGNALING	mTORC1 signaling	3.68341e-06	6.13902e-05
2250	HALLMARK_GLYCOLYSIS	glycolysis and gluconeogenesis	3.68341e-06	6.13902e-05
2281	HALLMARK_MYC_TARGETS_V1	MYC targets, variant 1	9.38477e-05	0.00469238
2434	HALLMARK_P53_PATHWAY	p53 pathway	1.99593e-05	0.000509068
2434	HALLMARK_E2F_TARGETS	cell cycle progression: E2F targets	2.03627e-05	0.000509068
2446	HALLMARK_OXIDATIVE_PHOSPHORYLATION	oxidative phosphorylation and citric acid cycle	4.2239e-06	0.000211195
2449	HALLMARK_OXIDATIVE_PHOSPHORYLATION	oxidative phosphorylation and citric acid cycle	4.2239e-06	0.000211195
2450	HALLMARK_OXIDATIVE_PHOSPHORYLATION	oxidative phosphorylation and citric acid cycle	8.43235e-09	4.21617e-07
2463	HALLMARK_GLYCOLYSIS	glycolysis and gluconeogenesis	3.90416e-08	1.95208e-06
2483	HALLMARK_TGF_BETA_SIGNALING	TGF beta signaling	0.000149218	0.00746089
2485	HALLMARK_E2F_TARGETS	cell cycle progression: E2F targets	9.38477e-05	0.00469238
2489	HALLMARK_INTERFERON_GAMMA_RESPONSE	interferon gamma response	0.000876253	0.0438127
2493	HALLMARK_ANGIOGENESIS	blood vessel formation	0.000646788	0.0323394
2526	HALLMARK_PI3K_AKT_MTOR_SIGNALING	PI3K signaling via AKT to mTORC1	0.000254106	0.0127053
2526	HALLMARK_ALLOGRAFT_REJECTION	allograft rejection	0.0016936	0.0423401
2537	HALLMARK_TGF_BETA_SIGNALING	TGF beta signaling	0.000444109	0.0222054
2558	HALLMARK_HYPOXIA	response to hypoxia; HIF1A targets	0.000876253	0.0219063
2558	HALLMARK_MTORC1_SIGNALING	mTORC1 signaling	0.000876253	0.0219063
2565	HALLMARK_MYC_TARGETS_V1	MYC targets, variant 1	0.000362719	0.0181359
2592	HALLMARK_MITOTIC_SPINDLE	cell cycle progression: mitotic spindle assembly	5.89023e-05	0.00294511
2670	HALLMARK_CHOLESTEROL_HOMEOSTASIS	cholesterol homeostasis	1.43635e-07	7.18173e-06
2799	HALLMARK_G2M_CHECKPOINT	cell cycle progression: G2/M checkpoint	1.84458e-07	9.22288e-06
2805	HALLMARK_MYC_TARGETS_V1	MYC targets, variant 1	2.03627e-05	0.00101814
2842	HALLMARK_E2F_TARGETS	cell cycle progression: E2F targets	0.000362719	0.0181359
2848	HALLMARK_APICAL_JUNCTION	apical junction complex consisting of adherens and tight junctions	0.000362719	0.0181359
2929	HALLMARK_MITOTIC_SPINDLE	cell cycle progression: mitotic spindle assembly	0.000362719	0.0181359
2931	HALLMARK_GLYCOLYSIS	glycolysis and gluconeogenesis	0.000362719	0.0181359
2969	HALLMARK_OXIDATIVE_PHOSPHORYLATION	oxidative phosphorylation and citric acid cycle	8.43235e-09	4.21617e-07
2970	HALLMARK_OXIDATIVE_PHOSPHORYLATION	oxidative phosphorylation and citric acid cycle	9.38477e-05	0.00469238
2982	HALLMARK_MYC_TARGETS_V1	MYC targets, variant 1	0.000362719	0.0181359
2983	HALLMARK_MYC_TARGETS_V1	MYC targets, variant 1	5.89023e-05	0.00294511
2989	HALLMARK_OXIDATIVE_PHOSPHORYLATION	oxidative phosphorylation and citric acid cycle	0	0
2995	HALLMARK_OXIDATIVE_PHOSPHORYLATION	oxidative phosphorylation and citric acid cycle	9.38477e-05	0.00469238
2999	HALLMARK_HEME_METABOLISM	heme metabolism and erythroid lineage	5.344e-08	2.672e-06
2999	HALLMARK_FATTY_ACID_METABOLISM	fatty acid metabolism	0.00142219	0.0355548
3015	HALLMARK_ANGIOGENESIS	blood vessel formation	0.000646788	0.0323394
3022	HALLMARK_OXIDATIVE_PHOSPHORYLATION	oxidative phosphorylation and citric acid cycle	2.185e-07	1.0925e-05
3022	HALLMARK_ADIPOGENESIS	adipocyte development	0.000255597	0.00638991
3122	HALLMARK_P53_PATHWAY	p53 pathway	9.24399e-05	0.004622
3159	HALLMARK_OXIDATIVE_PHOSPHORYLATION	oxidative phosphorylation and citric acid cycle	3.74e-10	1.87e-08
3159	HALLMARK_FATTY_ACID_METABOLISM	fatty acid metabolism	1.10128e-06	2.7532e-05
3159	HALLMARK_ADIPOGENESIS	adipocyte development	0.00286441	0.0477402
3245	HALLMARK_PI3K_AKT_MTOR_SIGNALING	PI3K signaling via AKT to mTORC1	5.26426e-05	0.00263213
3250	HALLMARK_UNFOLDED_PROTEIN_RESPONSE	unfolded protein response; ER stress	0.000659853	0.0329927
3300	HALLMARK_UNFOLDED_PROTEIN_RESPONSE	unfolded protein response; ER stress	1.67299e-05	0.000836497
3320	HALLMARK_MYC_TARGETS_V2	MYC targets, variant 2	0.000172367	0.00861834
3342	HALLMARK_IL6_JAK_STAT3_SIGNALING	IL6 STAT3 signaling during acute phase response	7.15722e-07	3.57861e-05
3342	HALLMARK_INTERFERON_GAMMA_RESPONSE	interferon gamma response	0.000876253	0.0219063
3455	HALLMARK_GLYCOLYSIS	glycolysis and gluconeogenesis	2.03627e-05	0.00101814
3467	HALLMARK_REACTIVE_OXIGEN_SPECIES_PATHWAY	reactive oxygen species pathway	0.00036525	0.0182625
3523	HALLMARK_PROTEIN_SECRETION	protein secretion	0.000475495	0.0164963
3523	HALLMARK_UNFOLDED_PROTEIN_RESPONSE	unfolded protein response; ER stress	0.000659853	0.0164963
3524	HALLMARK_OXIDATIVE_PHOSPHORYLATION	oxidative phosphorylation and citric acid cycle	4.2239e-06	0.000211195
3533	HALLMARK_MYC_TARGETS_V1	MYC targets, variant 1	9.38477e-05	0.00469238
3610	HALLMARK_HYPOXIA	response to hypoxia; HIF1A targets	9.38477e-05	0.00234619
3610	HALLMARK_MTORC1_SIGNALING	mTORC1 signaling	9.38477e-05	0.00234619
3647	HALLMARK_MTORC1_SIGNALING	mTORC1 signaling	0.000876253	0.0219063
3647	HALLMARK_MYC_TARGETS_V1	MYC targets, variant 1	0.000876253	0.0219063
3676	HALLMARK_IL6_JAK_STAT3_SIGNALING	IL6 STAT3 signaling during acute phase response	4.85927e-06	0.000242963
3676	HALLMARK_INTERFERON_GAMMA_RESPONSE	interferon gamma response	0.000132527	0.00331318
3676	HALLMARK_INTERFERON_ALPHA_RESPONSE	interferon alpha response	0.000345573	0.00575956
3713	HALLMARK_OXIDATIVE_PHOSPHORYLATION	oxidative phosphorylation and citric acid cycle	2.03627e-05	0.00101814
3737	HALLMARK_INTERFERON_ALPHA_RESPONSE	interferon alpha response	5.64511e-07	1.57653e-05
3737	HALLMARK_INTERFERON_GAMMA_RESPONSE	interferon gamma response	6.30612e-07	1.57653e-05
3737	HALLMARK_IL6_JAK_STAT3_SIGNALING	IL6 STAT3 signaling during acute phase response	1.69673e-05	0.000282789
3742	HALLMARK_EPITHELIAL_MESENCHYMAL_TRANSITION	epithelial mesenchymal transition	0.000362719	0.0181359
3751	HALLMARK_E2F_TARGETS	cell cycle progression: E2F targets	0.000362719	0.0181359
3823	HALLMARK_E2F_TARGETS	cell cycle progression: E2F targets	0.000876253	0.0438127
3967	HALLMARK_MITOTIC_SPINDLE	cell cycle progression: mitotic spindle assembly	0.000362719	0.0181359
3981	HALLMARK_E2F_TARGETS	cell cycle progression: E2F targets	9.38477e-05	0.00469238
3981	HALLMARK_MYC_TARGETS_V2	MYC targets, variant 2	0.000512691	0.0128173
4045	HALLMARK_OXIDATIVE_PHOSPHORYLATION	oxidative phosphorylation and citric acid cycle	9.38477e-05	0.00469238
4060	HALLMARK_OXIDATIVE_PHOSPHORYLATION	oxidative phosphorylation and citric acid cycle	2.03627e-05	0.00101814
4121	HALLMARK_GLYCOLYSIS	glycolysis and gluconeogenesis	1.05443e-07	5.27213e-06
4121	HALLMARK_HYPOXIA	response to hypoxia; HIF1A targets	0.00108085	0.0270212
4152	HALLMARK_NOTCH_SIGNALING	Notch signaling	0.000510152	0.0220378
4152	HALLMARK_WNT_BETA_CATENIN_SIGNALING	canonical beta catenin pathway	0.000881513	0.0220378
4195	HALLMARK_E2F_TARGETS	cell cycle progression: E2F targets	0.000876253	0.0438127
4265	HALLMARK_GLYCOLYSIS	glycolysis and gluconeogenesis	6.30612e-07	3.15306e-05
4300	HALLMARK_OXIDATIVE_PHOSPHORYLATION	oxidative phosphorylation and citric acid cycle	1.65064e-11	8.25318e-10
4303	HALLMARK_HYPOXIA	response to hypoxia; HIF1A targets	0.000362719	0.0181359
4352	HALLMARK_APOPTOSIS	programmed cell death; caspase pathway	4.87773e-05	0.00243887
4406	HALLMARK_MYC_TARGETS_V1	MYC targets, variant 1	9.38477e-05	0.00469238
4454	HALLMARK_INTERFERON_GAMMA_RESPONSE	interferon gamma response	5.89023e-05	0.00294511
4454	HALLMARK_IL6_JAK_STAT3_SIGNALING	IL6 STAT3 signaling during acute phase response	0.000145033	0.00362583
4492	HALLMARK_ANGIOGENESIS	blood vessel formation	0.000646788	0.0323394
4509	HALLMARK_NOTCH_SIGNALING	Notch signaling	0.000510152	0.0220378
4509	HALLMARK_WNT_BETA_CATENIN_SIGNALING	canonical beta catenin pathway	0.000881513	0.0220378
4530	HALLMARK_IL2_STAT5_SIGNALING	IL2 STAT5 signaling	5.89023e-05	0.00294511
4548	HALLMARK_TGF_BETA_SIGNALING	TGF beta signaling	0.000444109	0.0222054
4566	HALLMARK_MYC_TARGETS_V1	MYC targets, variant 1	9.38477e-05	0.00469238
4580	HALLMARK_MYC_TARGETS_V1	MYC targets, variant 1	9.38477e-05	0.00469238
4646	HALLMARK_MYC_TARGETS_V1	MYC targets, variant 1	5.89023e-05	0.00294511
4739	HALLMARK_TGF_BETA_SIGNALING	TGF beta signaling	0.000149218	0.00746089
4740	HALLMARK_TGF_BETA_SIGNALING	TGF beta signaling	1.77234e-06	8.86172e-05
4759	HALLMARK_MYC_TARGETS_V1	MYC targets, variant 1	2.03627e-05	0.00101814
4762	HALLMARK_MYC_TARGETS_V1	MYC targets, variant 1	1.09296e-06	5.46481e-05
5039	HALLMARK_CHOLESTEROL_HOMEOSTASIS	cholesterol homeostasis	7.11656e-09	3.55828e-07
5071	HALLMARK_P53_PATHWAY	p53 pathway	0.000357342	0.00906797
5071	HALLMARK_E2F_TARGETS	cell cycle progression: E2F targets	0.000362719	0.00906797
5081	HALLMARK_ANGIOGENESIS	blood vessel formation	0.00039009	0.0195045
5082	HALLMARK_APOPTOSIS	programmed cell death; caspase pathway	4.87773e-05	0.00243887
5093	HALLMARK_PI3K_AKT_MTOR_SIGNALING	PI3K signaling via AKT to mTORC1	0.000254106	0.0127053
5096	HALLMARK_MYC_TARGETS_V2	MYC targets, variant 2	0.000172367	0.00861834
5111	HALLMARK_MYC_TARGETS_V1	MYC targets, variant 1	0.000362719	0.0181359
5114	HALLMARK_UNFOLDED_PROTEIN_RESPONSE	unfolded protein response; ER stress	0.000659853	0.0329927
5125	HALLMARK_PROTEIN_SECRETION	protein secretion	0.000475495	0.0237747
5229	HALLMARK_PROTEIN_SECRETION	protein secretion	0.000475495	0.0237747

## Sheet: Supplementary file 1d
Supplementary file 1d: Reannotation of co-essential modules using KEGG pathway enrichment analysis. Genes in the individual modules can be obtained from PubMed ID: 33859415.														Mitra et al.
Module number	KEGG pathway ID	Description	P-value	FDR
172	hsa00140	Steroid hormone biosynthesis	0.00011162	0.0363882
176	hsa03013	RNA transport	0	0
184	hsa04961	Endocrine and other factor-regulated calcium reabsorption	4.93161e-13	1.60771e-10
184	hsa04721	Synaptic vesicle cycle	4.2889e-12	6.99091e-10
184	hsa04144	Endocytosis	2.96794e-11	3.22516e-09
184	hsa05016	Huntington disease	4.75733e-07	3.53287e-05
184	hsa04216	Ferroptosis	5.41851e-07	3.53287e-05
189	hsa03460	Fanconi anemia pathway	2.71785e-09	8.86018e-07
189	hsa03440	Homologous recombination	0.000184822	0.0301261
190	hsa00910	Nitrogen metabolism	1.26877e-05	0.00413618
192	hsa04714	Thermogenesis	0	0
192	hsa05016	Huntington disease	0	0
192	hsa05010	Alzheimer disease	0	0
192	hsa04932	Non-alcoholic fatty liver disease (NAFLD)	0	0
192	hsa05012	Parkinson disease	0	0
194	hsa04726	Serotonergic synapse	8.88108e-06	0.00124562
194	hsa00565	Ether lipid metabolism	1.26203e-05	0.00124562
194	hsa04611	Platelet activation	1.38355e-05	0.00124562
194	hsa04913	Ovarian steroidogenesis	1.55344e-05	0.00124562
194	hsa00592	alpha-Linolenic acid metabolism	1.91046e-05	0.00124562
195	hsa01200	Carbon metabolism	1.86194e-05	0.00606992
195	hsa01100	Metabolic pathways	0.000104065	0.0131091
195	hsa00010	Glycolysis / Gluconeogenesis	0.000122364	0.0131091
195	hsa00061	Fatty acid biosynthesis	0.000160847	0.0131091
195	hsa04152	AMPK signaling pathway	0.00065674	0.0387932
197	hsa03050	Proteasome	4.23041e-08	1.37911e-05
197	hsa03040	Spliceosome	0.000211684	0.0236766
197	hsa03010	Ribosome	0.000217883	0.0236766
207	hsa00650	Butanoate metabolism	7.89718e-05	0.0257448
207	hsa04960	Aldosterone-regulated sodium reabsorption	0.000240764	0.0392445
221	hsa00500	Starch and sucrose metabolism	0.000107186	0.0287466
221	hsa00980	Metabolism of xenobiotics by cytochrome P450	0.00017636	0.0287466
222	hsa01100	Metabolic pathways	0	0
222	hsa01200	Carbon metabolism	1.84417e-11	2.202e-09
222	hsa00020	Citrate cycle (TCA cycle)	2.02638e-11	2.202e-09
222	hsa00670	One carbon pool by folate	3.5703e-09	2.90979e-07
222	hsa00520	Amino sugar and nucleotide sugar metabolism	9.70589e-07	6.32824e-05
223	hsa03040	Spliceosome	0	0
223	hsa03050	Proteasome	1.9984e-15	3.25739e-13
223	hsa00240	Pyrimidine metabolism	2.91402e-05	0.00316657
223	hsa03020	RNA polymerase	0.000152688	0.0115042
223	hsa03010	Ribosome	0.000176444	0.0115042
224	hsa05170	Human immunodeficiency virus 1 infection	7.74794e-05	0.0252583
226	hsa03010	Ribosome	3.9968e-15	1.30296e-12
233	hsa04068	FoxO signaling pathway	2.09349e-06	0.000527447
233	hsa04213	Longevity regulating pathway	3.23587e-06	0.000527447
233	hsa04141	Protein processing in endoplasmic reticulum	6.2923e-06	0.000683763
233	hsa04211	Longevity regulating pathway	1.37871e-05	0.00106775
233	hsa04151	PI3K-Akt signaling pathway	1.63766e-05	0.00106775
236	hsa04062	Chemokine signaling pathway	8.49325e-07	0.00027688
236	hsa04060	Cytokine-cytokine receptor interaction	2.27243e-05	0.00370406
238	hsa04740	Olfactory transduction	8.06828e-09	2.63026e-06
254	hsa05322	Systemic lupus erythematosus	2.66652e-07	8.69285e-05
254	hsa05034	Alcoholism	3.42504e-05	0.00558281
256	hsa01100	Metabolic pathways	0	0
256	hsa04714	Thermogenesis	0	0
256	hsa05016	Huntington disease	0	0
256	hsa05010	Alzheimer disease	0	0
256	hsa04932	Non-alcoholic fatty liver disease (NAFLD)	0	0
260	hsa04144	Endocytosis	4.08946e-08	1.33317e-05
262	hsa00100	Steroid biosynthesis	6.92611e-09	2.25791e-06
262	hsa01100	Metabolic pathways	3.37163e-08	5.49576e-06
262	hsa00900	Terpenoid backbone biosynthesis	2.84632e-06	0.0003093
262	hsa01212	Fatty acid metabolism	3.13714e-05	0.00255677
262	hsa00061	Fatty acid biosynthesis	0.000131735	0.00858914
268	hsa03460	Fanconi anemia pathway	0	0
268	hsa03440	Homologous recombination	4.99822e-13	8.14711e-11
268	hsa03030	DNA replication	0.000237916	0.0258535
270	hsa01100	Metabolic pathways	7.32361e-06	0.0023875
270	hsa01200	Carbon metabolism	1.86194e-05	0.00303496
270	hsa00010	Glycolysis / Gluconeogenesis	0.000122364	0.0131091
270	hsa00061	Fatty acid biosynthesis	0.000160847	0.0131091
270	hsa04152	AMPK signaling pathway	0.00065674	0.0387932
278	hsa03018	RNA degradation	1.21555e-05	0.00396268
280	hsa04115	p53 signaling pathway	1.13447e-11	3.69837e-09
280	hsa04110	Cell cycle	1.53519e-06	0.000250235
280	hsa05206	MicroRNAs in cancer	3.93755e-06	0.000407163
280	hsa04218	Cellular senescence	5.40971e-06	0.000407163
280	hsa01524	Platinum drug resistance	6.24483e-06	0.000407163
283	hsa04110	Cell cycle	9.39162e-09	3.06167e-06
283	hsa04218	Cellular senescence	2.01268e-06	0.000328067
283	hsa04914	Progesterone-mediated oocyte maturation	0.000373243	0.0405591
288	hsa04810	Regulation of actin cytoskeleton	3.49994e-06	0.00114098
291	hsa03013	RNA transport	7.62993e-05	0.0248736
302	hsa04350	TGF-beta signaling pathway	0	0
302	hsa04390	Hippo signaling pathway	6.8146e-08	1.11078e-05
302	hsa04550	Signaling pathways regulating pluripotency of stem cells	1.68967e-06	0.000183611
302	hsa04060	Cytokine-cytokine receptor interaction	6.54701e-05	0.00533581
302	hsa04520	Adherens junction	0.000192141	0.0105084
303	hsa04350	TGF-beta signaling pathway	0	0
303	hsa04330	Notch signaling pathway	2.1639e-06	0.000352716
303	hsa04390	Hippo signaling pathway	1.0106e-05	0.000749266
303	hsa04520	Adherens junction	1.1112e-05	0.000749266
303	hsa05212	Pancreatic cancer	1.30803e-05	0.000749266
305	hsa04350	TGF-beta signaling pathway	8.75536e-10	2.85425e-07
305	hsa04330	Notch signaling pathway	5.33394e-07	8.69432e-05
305	hsa04520	Adherens junction	2.76824e-06	0.000224386
305	hsa05212	Pancreatic cancer	3.26291e-06	0.000224386
305	hsa05220	Chronic myeloid leukemia	3.44151e-06	0.000224386
307	hsa04330	Notch signaling pathway	1.11022e-16	3.61933e-14
307	hsa04658	Th1 and Th2 cell differentiation	1.1376e-06	0.000185428
307	hsa04520	Adherens junction	1.47053e-05	0.00118935
307	hsa05212	Pancreatic cancer	1.73044e-05	0.00118935
307	hsa05220	Chronic myeloid leukemia	1.82415e-05	0.00118935
318	hsa05160	Hepatitis C	6.93334e-13	1.21193e-10
318	hsa05162	Measles	7.43516e-13	1.21193e-10
318	hsa05164	Influenza A	7.91323e-12	8.59904e-10
318	hsa05169	Epstein-Barr virus infection	3.42242e-11	2.78927e-09
318	hsa05165	Human papillomavirus infection	1.03946e-10	6.77728e-09
329	hsa04110	Cell cycle	3.97785e-07	0.000129678
335	hsa00030	Pentose phosphate pathway	4.86153e-08	1.58486e-05
335	hsa01200	Carbon metabolism	2.2417e-07	3.65397e-05
335	hsa01100	Metabolic pathways	3.37078e-05	0.00366291
335	hsa01230	Biosynthesis of amino acids	0.000120102	0.00978829
343	hsa04920	Adipocytokine signaling pathway	0.000169269	0.0284836
343	hsa05202	Transcriptional misregulation in cancer	0.000174746	0.0284836
343	hsa04064	NF-kappa B signaling pathway	0.000436465	0.0288236
343	hsa04625	C-type lectin receptor signaling pathway	0.000569426	0.0288236
343	hsa05166	Human T-cell leukemia virus 1 infection	0.000585468	0.0288236
345	hsa04142	Lysosome	3.0077e-07	9.8051e-05
345	hsa05170	Human immunodeficiency virus 1 infection	4.4974e-06	0.000733077
345	hsa04961	Endocrine and other factor-regulated calcium reabsorption	2.9432e-05	0.00319828
366	hsa04630	JAK-STAT signaling pathway	6.93605e-05	0.0226115
367	hsa03008	Ribosome biogenesis in eukaryotes	3.21965e-15	1.0496e-12
376	hsa04141	Protein processing in endoplasmic reticulum	0.000110988	0.0361821
377	hsa04141	Protein processing in endoplasmic reticulum	4.51493e-05	0.0147187
382	hsa04150	mTOR signaling pathway	4.66294e-15	1.52012e-12
383	hsa04150	mTOR signaling pathway	0	0
383	hsa04140	Autophagy	1.79726e-06	0.000292954
383	hsa04211	Longevity regulating pathway	1.37871e-05	0.0014982
383	hsa04115	p53 signaling pathway	0.000248011	0.0202129
384	hsa01522	Endocrine resistance	1.53613e-07	5.00777e-05
384	hsa05223	Non-small cell lung cancer	7.05293e-06	0.000503566
384	hsa05166	Human T-cell leukemia virus 1 infection	7.18915e-06	0.000503566
384	hsa05214	Glioma	8.80009e-06	0.000503566
384	hsa05218	Melanoma	9.18079e-06	0.000503566
391	hsa00510	N-Glycan biosynthesis	2.70429e-08	8.81597e-06
392	hsa00510	N-Glycan biosynthesis	0	0
392	hsa04141	Protein processing in endoplasmic reticulum	9.17044e-14	1.49478e-11
392	hsa01100	Metabolic pathways	3.75537e-05	0.00408084
395	hsa04210	Apoptosis	6.40286e-06	0.00208733
395	hsa04115	p53 signaling pathway	0.000288261	0.0469866
397	hsa04014	Ras signaling pathway	2.86215e-13	9.33063e-11
397	hsa05211	Renal cell carcinoma	5.95524e-13	9.70704e-11
397	hsa05220	Chronic myeloid leukemia	1.2037e-12	1.29934e-10
397	hsa01521	EGFR tyrosine kinase inhibitor resistance	1.59428e-12	1.29934e-10
397	hsa04012	ErbB signaling pathway	2.70872e-12	1.76609e-10
403	hsa03440	Homologous recombination	3.40932e-09	1.11144e-06
403	hsa03460	Fanconi anemia pathway	1.28725e-06	0.000209821
403	hsa04218	Cellular senescence	9.74109e-05	0.0105853
404	hsa03013	RNA transport	5.84474e-09	1.90539e-06
405	hsa04110	Cell cycle	1.50502e-10	4.90635e-08
405	hsa04934	Cushing syndrome	8.10964e-08	1.06798e-05
405	hsa04218	Cellular senescence	9.82806e-08	1.06798e-05
405	hsa05223	Non-small cell lung cancer	2.12376e-07	1.1167e-05
405	hsa05214	Glioma	2.85839e-07	1.1167e-05
408	hsa04392	Hippo signaling pathway	2.97558e-09	9.7004e-07
408	hsa04390	Hippo signaling pathway	1.44494e-05	0.00235526
411	hsa03040	Spliceosome	1.01808e-07	3.31894e-05
411	hsa03018	RNA degradation	8.74396e-07	0.000142527
413	hsa04120	Ubiquitin mediated proteolysis	4.33613e-08	1.41358e-05
413	hsa04914	Progesterone-mediated oocyte maturation	8.23792e-05	0.0131373
413	hsa04110	Cell cycle	0.000161194	0.0131373
413	hsa04114	Oocyte meiosis	0.000161194	0.0131373
413	hsa04962	Vasopressin-regulated water reabsorption	0.000737289	0.0480712
440	hsa04310	Wnt signaling pathway	1.56099e-07	5.08884e-05
440	hsa05224	Breast cancer	3.19149e-05	0.00353947
440	hsa05226	Gastric cancer	3.25718e-05	0.00353947
440	hsa05225	Hepatocellular carcinoma	4.68115e-05	0.00381514
440	hsa05213	Endometrial cancer	0.000371411	0.0204175
454	hsa05134	Legionellosis	4.05281e-06	0.00132122
462	hsa04530	Tight junction	9.54792e-15	3.11262e-12
462	hsa04520	Adherens junction	1.05049e-09	1.7123e-07
462	hsa04390	Hippo signaling pathway	8.39653e-09	9.12423e-07
462	hsa04015	Rap1 signaling pathway	8.24088e-08	6.71632e-06
462	hsa04670	Leukocyte transendothelial migration	7.12789e-07	4.64739e-05
466	hsa04392	Hippo signaling pathway	1.58861e-05	0.00517888
466	hsa04611	Platelet activation	4.95528e-05	0.00807711
466	hsa04360	Axon guidance	0.000195604	0.0212556
466	hsa04810	Regulation of actin cytoskeleton	0.000415765	0.0338848
467	hsa04742	Taste transduction	8.14996e-05	0.0265689
471	hsa04510	Focal adhesion	0	0
471	hsa04810	Regulation of actin cytoskeleton	3.21965e-15	4.1019e-13
471	hsa05100	Bacterial invasion of epithelial cells	3.77476e-15	4.1019e-13
471	hsa05131	Shigellosis	2.69106e-08	2.19321e-06
471	hsa04670	Leukocyte transendothelial migration	7.12789e-07	4.64739e-05
473	hsa05225	Hepatocellular carcinoma	0	0
473	hsa04714	Thermogenesis	3.80979e-10	6.20996e-08
474	hsa00310	Lysine degradation	2.01881e-06	0.000658131
474	hsa05202	Transcriptional misregulation in cancer	6.46665e-05	0.0105406
475	hsa04392	Hippo signaling pathway	1.58861e-05	0.00517888
475	hsa04390	Hippo signaling pathway	0.000119232	0.0194349
476	hsa04120	Ubiquitin mediated proteolysis	1.70683e-06	0.000556427
479	hsa03050	Proteasome	3.77971e-11	1.23219e-08
479	hsa03010	Ribosome	7.36061e-10	1.19978e-07
479	hsa03040	Spliceosome	3.81155e-06	0.000414188
492	hsa04810	Regulation of actin cytoskeleton	5.75405e-10	1.8166e-07
492	hsa04270	Vascular smooth muscle contraction	1.51305e-09	1.8166e-07
492	hsa04611	Platelet activation	1.67172e-09	1.8166e-07
492	hsa04530	Tight junction	1.18608e-08	9.66657e-07
492	hsa05163	Human cytomegalovirus infection	3.09119e-06	0.000201546
493	hsa04120	Ubiquitin mediated proteolysis	1.70683e-06	0.000556427
505	hsa00310	Lysine degradation	7.91998e-07	0.000258191
505	hsa05202	Transcriptional misregulation in cancer	2.35801e-06	0.000384356
511	hsa04145	Phagosome	3.5289e-05	0.0115042
511	hsa04962	Vasopressin-regulated water reabsorption	0.000213104	0.034736
514	hsa04915	Estrogen signaling pathway	0	0
517	hsa04810	Regulation of actin cytoskeleton	7.02993e-13	2.29176e-10
517	hsa04270	Vascular smooth muscle contraction	9.27535e-11	1.13269e-08
517	hsa04611	Platelet activation	1.04235e-10	1.13269e-08
517	hsa04530	Tight junction	6.2737e-08	5.11307e-06
517	hsa04510	Focal adhesion	1.6072e-07	1.04789e-05
518	hsa03460	Fanconi anemia pathway	0	0
518	hsa03440	Homologous recombination	0	0
519	hsa04970	Salivary secretion	4.39849e-08	1.43391e-05
521	hsa03040	Spliceosome	4.61098e-12	1.50318e-09
522	hsa04130	SNARE interactions in vesicular transport	3.7257e-07	0.000121458
527	hsa05033	Nicotine addiction	6.14757e-07	0.000200411
527	hsa04727	GABAergic synapse	6.79409e-06	0.000817081
527	hsa05032	Morphine addiction	7.51915e-06	0.000817081
527	hsa04723	Retrograde endocannabinoid signaling	3.25718e-05	0.0026546
527	hsa04080	Neuroactive ligand-receptor interaction	0.000212678	0.0138666
528	hsa04215	Apoptosis	2.13672e-08	6.96571e-06
528	hsa04210	Apoptosis	1.13894e-07	1.85647e-05
528	hsa01524	Platinum drug resistance	6.35111e-07	6.90154e-05
528	hsa05210	Colorectal cancer	1.23199e-06	0.000100407
528	hsa05206	MicroRNAs in cancer	1.14239e-05	0.000744836
533	hsa04330	Notch signaling pathway	1.72925e-10	5.63735e-08
533	hsa05010	Alzheimer disease	0.000245877	0.0328321
533	hsa05165	Human papillomavirus infection	0.000302136	0.0328321
534	hsa04145	Phagosome	0	0
534	hsa00190	Oxidative phosphorylation	0	0
534	hsa05323	Rheumatoid arthritis	0	0
534	hsa05120	Epithelial cell signaling in Helicobacter pylori infection	0	0
534	hsa04721	Synaptic vesicle cycle	0	0
535	hsa04144	Endocytosis	9.15161e-09	2.98343e-06
535	hsa04145	Phagosome	0.000294779	0.048049
551	hsa00534	Glycosaminoglycan biosynthesis	0	0
551	hsa00532	Glycosaminoglycan biosynthesis	1.24304e-07	2.02616e-05
551	hsa01100	Metabolic pathways	6.79352e-06	0.000738229
557	hsa01100	Metabolic pathways	0	0
557	hsa01200	Carbon metabolism	1.75337e-08	2.85799e-06
557	hsa00670	One carbon pool by folate	8.26504e-08	8.98135e-06
557	hsa00230	Purine metabolism	5.86156e-07	4.74151e-05
557	hsa00020	Citrate cycle (TCA cycle)	7.27225e-07	4.74151e-05
559	hsa03010	Ribosome	0	0
560	hsa03460	Fanconi anemia pathway	0	0
560	hsa03440	Homologous recombination	1.77636e-15	2.89546e-13
570	hsa03040	Spliceosome	1.02141e-14	3.32978e-12
572	hsa04064	NF-kappa B signaling pathway	0	0
572	hsa04621	NOD-like receptor signaling pathway	6.66134e-16	1.0858e-13
572	hsa04622	RIG-I-like receptor signaling pathway	3.57492e-14	3.88474e-12
572	hsa05169	Epstein-Barr virus infection	3.41949e-13	2.78688e-11
572	hsa04657	IL-17 signaling pathway	3.55491e-11	2.3178e-09
573	hsa03018	RNA degradation	1.90502e-07	6.21035e-05
574	hsa04662	B cell receptor signaling pathway	3.38096e-08	1.10219e-05
577	hsa03008	Ribosome biogenesis in eukaryotes	0	0
577	hsa03013	RNA transport	6.87335e-10	1.12036e-07
577	hsa03018	RNA degradation	2.12778e-05	0.00231219
578	hsa00514	Other types of O-glycan biosynthesis	1.90535e-05	0.00621146
580	hsa04064	NF-kappa B signaling pathway	0	0
580	hsa04621	NOD-like receptor signaling pathway	2.22045e-16	3.61933e-14
580	hsa04668	TNF signaling pathway	1.29408e-12	1.40623e-10
580	hsa04622	RIG-I-like receptor signaling pathway	1.9833e-12	1.61639e-10
580	hsa04380	Osteoclast differentiation	5.20595e-12	3.39428e-10
583	hsa03460	Fanconi anemia pathway	9.35627e-08	3.05014e-05
584	hsa03008	Ribosome biogenesis in eukaryotes	0	0
584	hsa03018	RNA degradation	1.1898e-05	0.00193937
584	hsa03013	RNA transport	0.000219341	0.023835
590	hsa04919	Thyroid hormone signaling pathway	3.91928e-08	1.27768e-05
590	hsa03022	Basal transcription factors	1.22506e-06	0.000199686
595	hsa04115	p53 signaling pathway	5.27733e-12	1.72041e-09
595	hsa04110	Cell cycle	9.57776e-07	0.000156117
595	hsa05206	MicroRNAs in cancer	2.46398e-06	0.000267752
595	hsa04218	Cellular senescence	3.38913e-06	0.000276214
595	hsa01524	Platinum drug resistance	4.35638e-06	0.000284036
596	hsa04919	Thyroid hormone signaling pathway	3.47739e-10	1.13363e-07
596	hsa03022	Basal transcription factors	6.06804e-05	0.0098909
600	hsa04919	Thyroid hormone signaling pathway	1.73195e-12	5.64615e-10
604	hsa00510	N-Glycan biosynthesis	2.41406e-10	7.86984e-08
604	hsa04141	Protein processing in endoplasmic reticulum	2.88054e-09	4.69529e-07
604	hsa05166	Human T-cell leukemia virus 1 infection	1.85121e-06	0.000201165
604	hsa01523	Antifolate resistance	3.78638e-06	0.00030859
604	hsa04064	NF-kappa B signaling pathway	1.81314e-05	0.00118217
606	hsa05203	Viral carcinogenesis	0	0
606	hsa05034	Alcoholism	0	0
606	hsa05322	Systemic lupus erythematosus	0	0
606	hsa04217	Necroptosis	1.51943e-09	1.23833e-07
606	hsa05202	Transcriptional misregulation in cancer	8.48801e-07	5.53418e-05
619	hsa03018	RNA degradation	4.90061e-06	0.0015976
634	hsa04915	Estrogen signaling pathway	2.01617e-13	6.5727e-11
643	hsa04740	Olfactory transduction	3.51752e-07	0.000114671
644	hsa00510	N-Glycan biosynthesis	1.24953e-07	4.07347e-05
644	hsa01100	Metabolic pathways	1.05796e-06	0.000172447
644	hsa00520	Amino sugar and nucleotide sugar metabolism	1.47767e-05	0.00160574
657	hsa03020	RNA polymerase	1.39168e-06	0.000453686
657	hsa00240	Pyrimidine metabolism	5.04833e-05	0.00822878
657	hsa00230	Purine metabolism	0.000255494	0.0277637
684	hsa05310	Asthma	4.03206e-09	1.28545e-06
684	hsa05330	Allograft rejection	9.44435e-09	1.28545e-06
684	hsa05332	Graft-versus-host disease	1.29485e-08	1.28545e-06
684	hsa04940	Type I diabetes mellitus	1.57724e-08	1.28545e-06
684	hsa04672	Intestinal immune network for IgA production	2.70429e-08	1.76319e-06
715	hsa03050	Proteasome	3.71189e-09	1.21008e-06
715	hsa03040	Spliceosome	2.61567e-06	0.000426355
715	hsa00970	Aminoacyl-tRNA biosynthesis	0.000336527	0.0365693
717	hsa03015	mRNA surveillance pathway	7.51915e-06	0.00245124
725	hsa03050	Proteasome	7.68955e-05	0.0151449
725	hsa03040	Spliceosome	9.29132e-05	0.0151449
726	hsa00310	Lysine degradation	1.34425e-07	4.38227e-05
726	hsa05202	Transcriptional misregulation in cancer	1.36664e-05	0.00222762
739	hsa05160	Hepatitis C	2.45741e-11	4.26083e-09
739	hsa05162	Measles	2.61401e-11	4.26083e-09
739	hsa04630	JAK-STAT signaling pathway	1.37019e-10	1.48894e-08
739	hsa05164	Influenza A	2.11728e-10	1.72558e-08
739	hsa05169	Epstein-Barr virus infection	7.73604e-10	5.0439e-08
743	hsa03015	mRNA surveillance pathway	3.37965e-07	7.97861e-05
743	hsa05142	Chagas disease (American trypanosomiasis)	5.36056e-07	7.97861e-05
743	hsa04071	Sphingolipid signaling pathway	9.6456e-07	7.97861e-05
743	hsa04152	AMPK signaling pathway	1.03207e-06	7.97861e-05
743	hsa04728	Dopaminergic synapse	1.46846e-06	7.97861e-05
748	hsa05310	Asthma	5.26404e-05	0.0171608
749	hsa05202	Transcriptional misregulation in cancer	2.35801e-06	0.000768712
749	hsa05221	Acute myeloid leukemia	8.19231e-05	0.0133535
749	hsa05200	Pathways in cancer	0.000354472	0.0385193
752	hsa04110	Cell cycle	0	0
752	hsa04218	Cellular senescence	1.86517e-14	3.04023e-12
752	hsa05222	Small cell lung cancer	1.36124e-12	1.47922e-10
752	hsa05203	Viral carcinogenesis	1.40232e-11	1.14289e-09
752	hsa04115	p53 signaling pathway	2.15205e-09	1.40314e-07
754	hsa03040	Spliceosome	1.07059e-07	3.49011e-05
755	hsa03030	DNA replication	4.64799e-11	1.51525e-08
755	hsa03410	Base excision repair	1.21908e-08	1.98709e-06
755	hsa03420	Nucleotide excision repair	5.28919e-08	5.74759e-06
755	hsa00240	Pyrimidine metabolism	8.74539e-05	0.0071275
755	hsa00230	Purine metabolism	0.00043925	0.0286391
756	hsa05130	Pathogenic Escherichia coli infection	4.05281e-06	0.00132122
756	hsa04540	Gap junction	1.68363e-05	0.00274432
756	hsa04145	Phagosome	8.68672e-05	0.00943957
759	hsa05221	Acute myeloid leukemia	8.11575e-05	0.0220211
759	hsa05146	Amoebiasis	0.000172531	0.0220211
759	hsa04620	Toll-like receptor signaling pathway	0.000202648	0.0220211
768	hsa03020	RNA polymerase	1.34803e-09	4.39456e-07
768	hsa00240	Pyrimidine metabolism	1.73569e-07	2.82917e-05
768	hsa00230	Purine metabolism	1.55549e-06	0.00016903
779	hsa03050	Proteasome	1.80189e-11	5.87417e-09
779	hsa03040	Spliceosome	1.23494e-07	2.01296e-05
787	hsa04110	Cell cycle	1.91287e-05	0.00623597
789	hsa05218	Melanoma	1.77488e-06	0.000578611
789	hsa05216	Thyroid cancer	1.42059e-05	0.00123051
789	hsa04380	Osteoclast differentiation	1.77305e-05	0.00123051
789	hsa05219	Bladder cancer	1.94333e-05	0.00123051
789	hsa04650	Natural killer cell mediated cytotoxicity	1.94344e-05	0.00123051
793	hsa05221	Acute myeloid leukemia	3.87319e-05	0.0126266
795	hsa03008	Ribosome biogenesis in eukaryotes	1.31093e-05	0.00427365
808	hsa00600	Sphingolipid metabolism	1.88643e-10	6.14977e-08
808	hsa04071	Sphingolipid signaling pathway	2.22242e-06	0.000362254
808	hsa01100	Metabolic pathways	5.92064e-06	0.000643377
810	hsa05310	Asthma	1.34803e-09	4.30331e-07
810	hsa05330	Allograft rejection	3.15994e-09	4.30331e-07
810	hsa05332	Graft-versus-host disease	4.33382e-09	4.30331e-07
810	hsa04940	Type I diabetes mellitus	5.28013e-09	4.30331e-07
810	hsa04672	Intestinal immune network for IgA production	9.05916e-09	5.90657e-07
813	hsa04934	Cushing syndrome	9.03271e-05	0.0294466
814	hsa04144	Endocytosis	1.55431e-15	5.06706e-13
814	hsa04217	Necroptosis	2.7181e-10	4.4305e-08
815	hsa04144	Endocytosis	2.90012e-12	9.45441e-10
815	hsa04721	Synaptic vesicle cycle	8.24546e-09	1.34401e-06
815	hsa04145	Phagosome	6.20448e-08	6.74221e-06
815	hsa05110	Vibrio cholerae infection	1.355e-07	1.10433e-05
815	hsa04966	Collecting duct acid secretion	5.62779e-07	3.51847e-05
831	hsa01521	EGFR tyrosine kinase inhibitor resistance	6.40291e-08	2.08735e-05
831	hsa05205	Proteoglycans in cancer	2.61215e-06	0.000425781
831	hsa04012	ErbB signaling pathway	1.51633e-05	0.00123776
831	hsa05215	Prostate cancer	2.25787e-05	0.00123776
831	hsa01522	Endocrine resistance	2.32869e-05	0.00123776
836	hsa03050	Proteasome	1.97065e-13	6.42431e-11
836	hsa03040	Spliceosome	1.93246e-10	3.14991e-08
836	hsa03020	RNA polymerase	1.01501e-05	0.00110298
836	hsa00240	Pyrimidine metabolism	8.16011e-05	0.00665049
840	hsa03013	RNA transport	2.85216e-12	9.29805e-10
845	hsa03018	RNA degradation	4.90061e-06	0.0015976
846	hsa03015	mRNA surveillance pathway	2.74981e-10	8.96438e-08
861	hsa05218	Melanoma	6.00577e-07	0.000195788
861	hsa04380	Osteoclast differentiation	6.07454e-06	0.000544107
861	hsa04650	Natural killer cell mediated cytotoxicity	6.66274e-06	0.000544107
861	hsa05216	Thyroid cancer	6.67616e-06	0.000544107
861	hsa05219	Bladder cancer	9.14038e-06	0.000595953
868	hsa03050	Proteasome	1.03917e-13	3.38769e-11
868	hsa03040	Spliceosome	3.13682e-12	5.11302e-10
881	hsa03015	mRNA surveillance pathway	0	0
898	hsa04137	Mitophagy	8.61086e-08	2.12948e-05
898	hsa04520	Adherens junction	1.30643e-07	2.12948e-05
898	hsa03008	Ribosome biogenesis in eukaryotes	2.10851e-07	2.29125e-05
898	hsa04064	NF-kappa B signaling pathway	4.02209e-07	3.278e-05
898	hsa05162	Measles	1.51401e-06	9.87133e-05
902	hsa04330	Notch signaling pathway	0.000127496	0.0415636
921	hsa04810	Regulation of actin cytoskeleton	4.66294e-15	1.52012e-12
921	hsa05100	Bacterial invasion of epithelial cells	3.20854e-14	5.22993e-12
921	hsa04666	Fc gamma R-mediated phagocytosis	1.0836e-09	1.17751e-07
921	hsa05131	Shigellosis	6.88511e-09	5.61136e-07
921	hsa04510	Focal adhesion	9.46829e-09	6.17333e-07
935	hsa03010	Ribosome	1.66533e-14	5.42899e-12
947	hsa03018	RNA degradation	1.36557e-14	4.45177e-12
952	hsa03050	Proteasome	2.23782e-07	7.29529e-05
952	hsa03040	Spliceosome	2.61567e-06	0.000426355
956	hsa05211	Renal cell carcinoma	3.25029e-06	0.00105959
956	hsa04066	HIF-1 signaling pathway	9.99883e-06	0.00162981
958	hsa03013	RNA transport	1.1825e-07	3.85494e-05
958	hsa03008	Ribosome biogenesis in eukaryotes	4.87818e-07	7.95144e-05
976	hsa03008	Ribosome biogenesis in eukaryotes	9.67372e-07	0.000315363
978	hsa05131	Shigellosis	8.61086e-08	2.80714e-05
978	hsa04810	Regulation of actin cytoskeleton	1.02584e-05	0.00167212
978	hsa05132	Salmonella infection	3.11474e-05	0.00338468
978	hsa04270	Vascular smooth muscle contraction	8.66941e-05	0.00706557
978	hsa04921	Oxytocin signaling pathway	0.000171068	0.0111062
987	hsa00510	N-Glycan biosynthesis	3.33067e-16	1.0858e-13
987	hsa04141	Protein processing in endoplasmic reticulum	1.07129e-10	1.7462e-08
1004	hsa00250	Alanine, aspartate and glutamate metabolism	3.11988e-07	0.000101708
1004	hsa00220	Arginine biosynthesis	5.83031e-06	0.00075629
1004	hsa01230	Biosynthesis of amino acids	6.95973e-06	0.00075629
1004	hsa00400	Phenylalanine, tyrosine and tryptophan biosynthesis	2.94226e-05	0.00239794
1004	hsa00330	Arginine and proline metabolism	8.33827e-05	0.00543655
1007	hsa05221	Acute myeloid leukemia	1.17506e-12	1.76647e-10
1007	hsa04014	Ras signaling pathway	1.531e-12	1.76647e-10
1007	hsa05211	Renal cell carcinoma	1.62559e-12	1.76647e-10
1007	hsa05220	Chronic myeloid leukemia	3.28271e-12	2.67541e-10
1007	hsa01521	EGFR tyrosine kinase inhibitor resistance	4.3463e-12	2.83379e-10
1010	hsa04962	Vasopressin-regulated water reabsorption	8.23732e-07	0.000268537
1010	hsa05132	Salmonella infection	6.3375e-06	0.00103301
1010	hsa04145	Phagosome	3.5289e-05	0.00383474
1013	hsa04110	Cell cycle	4.88498e-15	1.5925e-12
1013	hsa04218	Cellular senescence	7.20579e-12	1.17454e-09
1013	hsa05222	Small cell lung cancer	1.30524e-11	1.41837e-09
1013	hsa05215	Prostate cancer	1.65203e-07	9.26835e-06
1013	hsa05169	Epstein-Barr virus infection	1.70583e-07	9.26835e-06
1014	hsa04120	Ubiquitin mediated proteolysis	1.70683e-06	0.000556427
1016	hsa05160	Hepatitis C	1.46846e-06	0.000478717
1016	hsa04730	Long-term depression	1.04996e-05	0.00171144
1016	hsa05142	Chagas disease (American trypanosomiasis)	5.19969e-05	0.00565033
1016	hsa04071	Sphingolipid signaling pathway	8.04284e-05	0.00655492
1016	hsa04261	Adrenergic signaling in cardiomyocytes	0.000145658	0.0094969
1027	hsa03018	RNA degradation	4.90061e-06	0.0015976
1028	hsa05211	Renal cell carcinoma	4.06686e-12	1.3258e-09
1028	hsa04066	HIF-1 signaling pathway	4.02915e-11	6.56752e-09
1028	hsa05200	Pathways in cancer	8.96507e-07	9.74204e-05
1035	hsa03013	RNA transport	3.22976e-10	1.0529e-07
1036	hsa03050	Proteasome	4.66294e-15	1.52012e-12
1036	hsa03040	Spliceosome	1.45257e-11	2.36769e-09
1037	hsa03018	RNA degradation	4.90061e-06	0.0015976
1048	hsa03022	Basal transcription factors	0	0
1048	hsa05168	Herpes simplex infection	9.3e-09	1.5159e-06
1062	hsa04810	Regulation of actin cytoskeleton	9.70376e-05	0.0316342
1075	hsa03050	Proteasome	0	0
1075	hsa05169	Epstein-Barr virus infection	7.88258e-15	1.28486e-12
1084	hsa04392	Hippo signaling pathway	1.98765e-07	6.47974e-05
1084	hsa04390	Hippo signaling pathway	0.000164183	0.0267619
1105	hsa03050	Proteasome	1.3842e-11	4.5125e-09
1105	hsa03010	Ribosome	4.9668e-09	8.09588e-07
1105	hsa03040	Spliceosome	0.000298653	0.0324537
1111	hsa00563	Glycosylphosphatidylinositol (GPI)-anchor biosynthesis	0	0
1111	hsa01100	Metabolic pathways	4.93028e-12	8.03635e-10
1111	hsa00510	N-Glycan biosynthesis	2.4407e-05	0.00265222
1126	hsa05213	Endometrial cancer	1.48977e-09	1.71725e-07
1126	hsa05221	Acute myeloid leukemia	2.8976e-09	1.71725e-07
1126	hsa05223	Non-small cell lung cancer	2.8976e-09	1.71725e-07
1126	hsa04664	Fc epsilon RI signaling pathway	3.37745e-09	1.71725e-07
1126	hsa05211	Renal cell carcinoma	3.64005e-09	1.71725e-07
1132	hsa05206	MicroRNAs in cancer	2.96046e-08	9.53545e-06
1132	hsa01521	EGFR tyrosine kinase inhibitor resistance	5.84997e-08	9.53545e-06
1132	hsa05215	Prostate cancer	1.65203e-07	1.38919e-05
1132	hsa04151	PI3K-Akt signaling pathway	1.70452e-07	1.38919e-05
1132	hsa04140	Autophagy	6.6373e-07	4.20455e-05
1151	hsa04310	Wnt signaling pathway	3.12668e-05	0.00281958
1151	hsa05224	Breast cancer	3.19149e-05	0.00281958
1151	hsa05226	Gastric cancer	3.25718e-05	0.00281958
1151	hsa04150	mTOR signaling pathway	3.45961e-05	0.00281958
1151	hsa05225	Hepatocellular carcinoma	4.68115e-05	0.00305211
1162	hsa03022	Basal transcription factors	0	0
1162	hsa05168	Herpes simplex infection	2.03654e-07	3.31956e-05
1166	hsa04740	Olfactory transduction	6.76812e-05	0.0220641
1186	hsa04934	Cushing syndrome	3.67022e-05	0.0119649
1187	hsa04110	Cell cycle	1.75609e-09	5.72487e-07
1187	hsa04218	Cellular senescence	2.6113e-05	0.00425642
1187	hsa04914	Progesterone-mediated oocyte maturation	0.000193822	0.021062
1187	hsa04114	Oocyte meiosis	0.000377296	0.0307496
1189	hsa04961	Endocrine and other factor-regulated calcium reabsorption	4.09004e-05	0.00403771
1189	hsa04927	Cortisol synthesis and secretion	7.62767e-05	0.00403771
1189	hsa04924	Renin secretion	7.86982e-05	0.00403771
1189	hsa04720	Long-term potentiation	8.36547e-05	0.00403771
1189	hsa04918	Thyroid hormone synthesis	0.000102194	0.00403771
1193	hsa04150	mTOR signaling pathway	2.9976e-15	9.77218e-13
1193	hsa04151	PI3K-Akt signaling pathway	1.65995e-11	2.70572e-09
1193	hsa05167	Kaposi sarcoma-associated herpesvirus infection	1.82186e-10	1.97975e-08
1193	hsa04725	Cholinergic synapse	2.70973e-10	2.20843e-08
1193	hsa05170	Human immunodeficiency virus 1 infection	5.20303e-10	3.39237e-08
1194	hsa03020	RNA polymerase	0	0
1194	hsa04623	Cytosolic DNA-sensing pathway	1.11022e-16	1.80966e-14
1194	hsa00240	Pyrimidine metabolism	9.10383e-15	9.89283e-13
1194	hsa00230	Purine metabolism	1.37979e-12	1.12452e-10
1194	hsa01100	Metabolic pathways	6.71985e-05	0.00438134
1196	hsa04630	JAK-STAT signaling pathway	1.88165e-11	6.13418e-09
1196	hsa04550	Signaling pathways regulating pluripotency of stem cells	1.27095e-07	2.07166e-05
1196	hsa04659	Th17 cell differentiation	0.000164461	0.0134036
1196	hsa04931	Insulin resistance	0.000164461	0.0134036
1196	hsa05160	Hepatitis C	0.000299614	0.0195348
1201	hsa04115	p53 signaling pathway	5.27733e-12	1.72041e-09
1201	hsa04110	Cell cycle	9.57776e-07	0.000156117
1201	hsa05206	MicroRNAs in cancer	2.46398e-06	0.000267752
1201	hsa04218	Cellular senescence	3.38913e-06	0.000276214
1201	hsa01524	Platinum drug resistance	4.35638e-06	0.000284036
1220	hsa00030	Pentose phosphate pathway	2.92529e-08	9.53645e-06
1220	hsa01200	Carbon metabolism	1.13529e-07	1.85052e-05
1220	hsa01230	Biosynthesis of amino acids	8.4699e-05	0.00920396
1225	hsa03022	Basal transcription factors	7.54952e-15	2.46114e-12
1225	hsa03420	Nucleotide excision repair	4.34042e-12	7.07488e-10
1225	hsa05203	Viral carcinogenesis	6.40566e-05	0.00696082
1226	hsa03022	Basal transcription factors	0	0
1226	hsa03420	Nucleotide excision repair	3.4972e-14	5.70044e-12
1226	hsa05203	Viral carcinogenesis	3.45877e-06	0.000375853
1230	hsa04950	Maturity onset diabetes of the young	7.34551e-05	0.0239464
1247	hsa04144	Endocytosis	2.44249e-15	7.96252e-13
1247	hsa04140	Autophagy	0.000141548	0.0230722
1251	hsa05310	Asthma	0.000105001	0.0156631
1251	hsa05330	Allograft rejection	0.000158539	0.0156631
1251	hsa05332	Graft-versus-host disease	0.000184822	0.0156631
1251	hsa04940	Type I diabetes mellitus	0.000203455	0.0156631
1251	hsa04672	Intestinal immune network for IgA production	0.000264672	0.0156631
1252	hsa05410	Hypertrophic cardiomyopathy (HCM)	1.64387e-05	0.00535901
1252	hsa05412	Arrhythmogenic right ventricular cardiomyopathy (ARVC)	0.000174109	0.0283797
1252	hsa05414	Dilated cardiomyopathy (DCM)	0.00041151	0.0447174
1274	hsa01212	Fatty acid metabolism	3.41084e-07	0.000111193
1274	hsa01040	Biosynthesis of unsaturated fatty acids	5.38664e-06	0.000810721
1274	hsa00062	Fatty acid elongation	7.46063e-06	0.000810721
1274	hsa01100	Metabolic pathways	3.37078e-05	0.00274718
1274	hsa00061	Fatty acid biosynthesis	0.000131735	0.00858914
1278	hsa04742	Taste transduction	7.70863e-05	0.0251301
1282	hsa04217	Necroptosis	4.273e-05	0.01393
1285	hsa05166	Human T-cell leukemia virus 1 infection	4.0994e-08	1.33641e-05
1285	hsa05202	Transcriptional misregulation in cancer	7.10722e-06	0.000933361
1285	hsa05169	Epstein-Barr virus infection	1.03886e-05	0.000933361
1285	hsa04064	NF-kappa B signaling pathway	1.24959e-05	0.000933361
1285	hsa01523	Antifolate resistance	1.50451e-05	0.000933361
1286	hsa04740	Olfactory transduction	6.76812e-05	0.0220641
1303	hsa03010	Ribosome	3.66966e-07	0.000119631
1308	hsa04919	Thyroid hormone signaling pathway	7.64216e-05	0.0249134
1321	hsa03008	Ribosome biogenesis in eukaryotes	7.00288e-10	2.28294e-07
1321	hsa03013	RNA transport	2.41487e-06	0.000393624
1328	hsa03022	Basal transcription factors	0	0
1328	hsa05168	Herpes simplex infection	1.17213e-06	0.000191058
1333	hsa04962	Vasopressin-regulated water reabsorption	0.000213104	0.014106
1333	hsa04961	Endocrine and other factor-regulated calcium reabsorption	0.000243381	0.014106
1333	hsa04913	Ovarian steroidogenesis	0.000264672	0.014106
1333	hsa04923	Regulation of lipolysis in adipocytes	0.000321767	0.014106
1333	hsa04213	Longevity regulating pathway	0.000424573	0.014106
1334	hsa04150	mTOR signaling pathway	3.0087e-14	9.80838e-12
1334	hsa04140	Autophagy	1.38385e-10	2.25567e-08
1334	hsa04910	Insulin signaling pathway	2.24177e-10	2.43606e-08
1334	hsa05215	Prostate cancer	2.11205e-09	1.55964e-07
1334	hsa05231	Choline metabolism in cancer	2.39208e-09	1.55964e-07
1335	hsa03018	RNA degradation	4.18801e-05	0.0136529
1337	hsa04150	mTOR signaling pathway	0	0
1337	hsa04211	Longevity regulating pathway	0.000199945	0.032591
1339	hsa04330	Notch signaling pathway	0.000127496	0.0415636
1346	hsa04144	Endocytosis	1.23826e-06	0.000403671
1354	hsa05166	Human T-cell leukemia virus 1 infection	3.79331e-08	7.6226e-06
1354	hsa04064	NF-kappa B signaling pathway	4.67644e-08	7.6226e-06
1354	hsa05169	Epstein-Barr virus infection	1.70963e-07	1.85779e-05
1354	hsa04920	Adipocytokine signaling pathway	3.76437e-07	3.06797e-05
1354	hsa01523	Antifolate resistance	6.19145e-07	4.03683e-05
1360	hsa04110	Cell cycle	4.84265e-06	0.00157871
1367	hsa04137	Mitophagy	7.86982e-05	0.0256556
1367	hsa04668	TNF signaling pathway	0.000226825	0.0369725
1375	hsa05202	Transcriptional misregulation in cancer	5.97659e-06	0.00162637
1375	hsa00310	Lysine degradation	9.97776e-06	0.00162637
1399	hsa03460	Fanconi anemia pathway	0	0
1399	hsa03440	Homologous recombination	4.65304e-09	7.58445e-07
1399	hsa03030	DNA replication	7.00295e-06	0.000760987
1399	hsa03420	Nucleotide excision repair	0.000593035	0.0483324
1400	hsa03450	Non-homologous end-joining	8.84462e-06	0.00288334
1406	hsa03430	Mismatch repair	9.57242e-06	0.00312061
1406	hsa03030	DNA replication	2.38365e-05	0.00388535
1406	hsa03420	Nucleotide excision repair	4.09004e-05	0.00444451
1416	hsa04810	Regulation of actin cytoskeleton	1.57197e-08	5.12462e-06
1416	hsa04611	Platelet activation	5.18106e-06	0.000844513
1416	hsa04072	Phospholipase D signaling pathway	1.02601e-05	0.00111493
1416	hsa05200	Pathways in cancer	8.89903e-05	0.00725271
1416	hsa04270	Vascular smooth muscle contraction	0.000236883	0.0154447
1420	hsa00450	Selenocompound metabolism	2.04059e-12	6.65232e-10
1423	hsa04110	Cell cycle	1.1776e-06	0.000383897
1424	hsa03018	RNA degradation	4.82503e-13	1.57296e-10
1424	hsa03040	Spliceosome	2.04343e-11	3.33079e-09
1429	hsa05218	Melanoma	6.00577e-07	0.000195788
1429	hsa04380	Osteoclast differentiation	6.07454e-06	0.000544107
1429	hsa04650	Natural killer cell mediated cytotoxicity	6.66274e-06	0.000544107
1429	hsa05216	Thyroid cancer	6.67616e-06	0.000544107
1429	hsa05219	Bladder cancer	9.14038e-06	0.000595953
1431	hsa04150	mTOR signaling pathway	0	0
1431	hsa04140	Autophagy	4.21092e-08	6.8638e-06
1431	hsa04211	Longevity regulating pathway	0.000107074	0.0116354
1438	hsa05218	Melanoma	2.00598e-08	6.5395e-06
1438	hsa05216	Thyroid cancer	1.16619e-07	1.90089e-05
1438	hsa05219	Bladder cancer	1.78344e-07	1.93801e-05
1438	hsa04650	Natural killer cell mediated cytotoxicity	4.1234e-07	3.36057e-05
1438	hsa05213	Endometrial cancer	7.38794e-07	3.94929e-05
1439	hsa04010	MAPK signaling pathway	1.06399e-07	3.46862e-05
1439	hsa04912	GnRH signaling pathway	1.98887e-05	0.00324186
1439	hsa04218	Cellular senescence	0.000101249	0.0110024
1439	hsa05169	Epstein-Barr virus infection	0.000199782	0.0162822
1439	hsa05014	Amyotrophic lateral sclerosis (ALS)	0.000475933	0.0310308
1440	hsa04912	GnRH signaling pathway	1.68864e-06	0.000540151
1440	hsa04668	TNF signaling pathway	3.31381e-06	0.000540151
1440	hsa04380	Osteoclast differentiation	6.07454e-06	0.000660101
1440	hsa04012	ErbB signaling pathway	8.278e-05	0.00603428
1440	hsa05166	Human T-cell leukemia virus 1 infection	9.25502e-05	0.00603428
1441	hsa04540	Gap junction	9.92742e-08	3.23634e-05
1441	hsa04010	MAPK signaling pathway	1.28597e-05	0.00209613
1441	hsa04912	GnRH signaling pathway	1.98887e-05	0.00216124
1441	hsa04722	Neurotrophin signaling pathway	4.17403e-05	0.00340183
1441	hsa04921	Oxytocin signaling pathway	8.68672e-05	0.00566374
1442	hsa04630	JAK-STAT signaling pathway	2.14035e-06	0.000697754
1442	hsa05220	Chronic myeloid leukemia	0.000170511	0.0277933
1442	hsa04659	Th17 cell differentiation	0.000469195	0.0382394
1442	hsa04931	Insulin resistance	0.000469195	0.0382394
1448	hsa03030	DNA replication	9.54792e-15	3.11262e-12
1448	hsa04110	Cell cycle	2.18038e-11	3.55402e-09
1463	hsa03018	RNA degradation	8.88178e-16	2.89546e-13
1463	hsa03008	Ribosome biogenesis in eukaryotes	9.46986e-06	0.00154359
1478	hsa00670	One carbon pool by folate	6.22367e-10	2.02892e-07
1478	hsa01523	Antifolate resistance	1.39168e-06	0.000226843
1494	hsa04520	Adherens junction	9.6708e-05	0.0315268
1494	hsa04670	Leukocyte transendothelial migration	0.000235187	0.0383354
1496	hsa03030	DNA replication	4.66294e-15	1.52012e-12
1496	hsa03410	Base excision repair	7.24463e-08	1.18087e-05
1496	hsa03420	Nucleotide excision repair	2.9432e-05	0.00319828
1496	hsa00240	Pyrimidine metabolism	0.000290863	0.0237053
1499	hsa05218	Melanoma	1.82309e-05	0.00594329
1499	hsa04380	Osteoclast differentiation	0.000102544	0.0119404
1499	hsa04650	Natural killer cell mediated cytotoxicity	0.000109881	0.0119404
1499	hsa05216	Thyroid cancer	0.000373151	0.0247783
1499	hsa04024	cAMP signaling pathway	0.000380035	0.0247783
1500	hsa03010	Ribosome	0.000128596	0.0419222
1501	hsa03050	Proteasome	4.74731e-13	1.54762e-10
1501	hsa03040	Spliceosome	1.08294e-08	1.76519e-06
1501	hsa03010	Ribosome	3.29918e-06	0.000358511
1503	hsa03050	Proteasome	3.57603e-13	1.16579e-10
1503	hsa03040	Spliceosome	1.45257e-11	2.36769e-09
1503	hsa03010	Ribosome	3.66389e-05	0.00398143
1504	hsa05134	Legionellosis	8.06215e-06	0.00262826
1505	hsa05202	Transcriptional misregulation in cancer	1.20395e-06	0.000392487
1505	hsa00310	Lysine degradation	4.11851e-05	0.00671316
1514	hsa03450	Non-homologous end-joining	1.55664e-07	5.07465e-05
1514	hsa03030	DNA replication	3.84937e-06	0.000627447
1516	hsa04010	MAPK signaling pathway	1.06399e-07	3.46862e-05
1516	hsa04912	GnRH signaling pathway	1.98887e-05	0.00324186
1516	hsa04218	Cellular senescence	0.000101249	0.0110024
1516	hsa05169	Epstein-Barr virus infection	0.000199782	0.0162822
1516	hsa05014	Amyotrophic lateral sclerosis (ALS)	0.000475933	0.0310308
1525	hsa03008	Ribosome biogenesis in eukaryotes	2.66038e-11	8.67285e-09
1525	hsa03013	RNA transport	0.0001595	0.0259985
1526	hsa03008	Ribosome biogenesis in eukaryotes	7.16561e-05	0.0233599
1530	hsa04120	Ubiquitin mediated proteolysis	1.70683e-06	0.000556427
1546	hsa05163	Human cytomegalovirus infection	0.000114321	0.0372688
1571	hsa04915	Estrogen signaling pathway	1.72444e-06	0.000562166
1578	hsa04137	Mitophagy	2.88969e-08	7.15178e-06
1578	hsa04520	Adherens junction	4.38759e-08	7.15178e-06
1578	hsa03008	Ribosome biogenesis in eukaryotes	7.08845e-08	7.70279e-06
1578	hsa04064	NF-kappa B signaling pathway	1.35426e-07	1.10372e-05
1578	hsa05162	Measles	5.11879e-07	3.33745e-05
1580	hsa03010	Ribosome	0	0
1604	hsa04210	Apoptosis	6.40286e-06	0.00208733
1604	hsa04115	p53 signaling pathway	0.000288261	0.0469866
1619	hsa04115	p53 signaling pathway	5.27733e-12	1.72041e-09
1619	hsa04110	Cell cycle	9.57776e-07	0.000156117
1619	hsa05206	MicroRNAs in cancer	2.46398e-06	0.000267752
1619	hsa04218	Cellular senescence	3.38913e-06	0.000276214
1619	hsa01524	Platinum drug resistance	4.35638e-06	0.000284036
1628	hsa04360	Axon guidance	3.71796e-05	0.0121205
1633	hsa00970	Aminoacyl-tRNA biosynthesis	1.13384e-05	0.00369632
1639	hsa00310	Lysine degradation	1.73603e-05	0.00565944
1642	hsa04142	Lysosome	9.10447e-05	0.0296806
1655	hsa04110	Cell cycle	4.32915e-09	1.4113e-06
1655	hsa04218	Cellular senescence	1.11766e-06	0.000182178
1655	hsa04914	Progesterone-mediated oocyte maturation	6.37871e-06	0.000693153
1655	hsa04114	Oocyte meiosis	1.56336e-05	0.00127414
1658	hsa00590	Arachidonic acid metabolism	7.38931e-05	0.0240891
1661	hsa04014	Ras signaling pathway	4.06355e-11	1.32472e-08
1661	hsa04010	MAPK signaling pathway	2.80596e-10	4.57371e-08
1661	hsa05221	Acute myeloid leukemia	1.28574e-08	1.39717e-06
1661	hsa05220	Chronic myeloid leukemia	2.64264e-08	2.09826e-06
1661	hsa01521	EGFR tyrosine kinase inhibitor resistance	3.21819e-08	2.09826e-06
1674	hsa03050	Proteasome	3.33067e-15	1.0858e-12
1674	hsa03040	Spliceosome	1.01164e-11	1.64897e-09
1677	hsa04740	Olfactory transduction	4.16524e-05	0.0135787
1679	hsa03020	RNA polymerase	0	0
1679	hsa04623	Cytosolic DNA-sensing pathway	2.22045e-16	3.61933e-14
1679	hsa00240	Pyrimidine metabolism	2.53131e-14	2.75069e-12
1679	hsa00230	Purine metabolism	3.78442e-12	3.0843e-10
1679	hsa01100	Metabolic pathways	0.000158164	0.0103123
1682	hsa00970	Aminoacyl-tRNA biosynthesis	7.94738e-10	2.59085e-07
1683	hsa03018	RNA degradation	3.73503e-11	1.21762e-08
1683	hsa03040	Spliceosome	9.09531e-10	1.48253e-07
1689	hsa04720	Long-term potentiation	7.38201e-06	0.00125854
1689	hsa05031	Amphetamine addiction	7.72111e-06	0.00125854
1689	hsa03015	mRNA surveillance pathway	1.86273e-05	0.00192443
1689	hsa04750	Inflammatory mediator regulation of TRP channels	2.40096e-05	0.00192443
1689	hsa04931	Insulin resistance	3.03324e-05	0.00192443
1693	hsa03015	mRNA surveillance pathway	3.69166e-05	0.00716421
1693	hsa04071	Sphingolipid signaling pathway	8.04284e-05	0.00716421
1693	hsa04152	AMPK signaling pathway	8.45711e-05	0.00716421
1693	hsa04114	Oocyte meiosis	9.32728e-05	0.00716421
1693	hsa04728	Dopaminergic synapse	0.000109881	0.00716421
1696	hsa04530	Tight junction	7.69661e-07	0.00025091
1696	hsa04810	Regulation of actin cytoskeleton	2.35752e-06	0.000384275
1696	hsa04270	Vascular smooth muscle contraction	8.62227e-06	0.000750122
1696	hsa04611	Platelet activation	9.20395e-06	0.000750122
1696	hsa05130	Pathogenic Escherichia coli infection	3.33194e-05	0.00217242
1700	hsa00520	Amino sugar and nucleotide sugar metabolism	1.07531e-06	0.00035055
1706	hsa04141	Protein processing in endoplasmic reticulum	0.000110988	0.0361821
1724	hsa04122	Sulfur relay system	3.00648e-12	9.80114e-10
1731	hsa04137	Mitophagy	5.81845e-09	1.44114e-06
1731	hsa04520	Adherens junction	8.84138e-09	1.44114e-06
1731	hsa03008	Ribosome biogenesis in eukaryotes	1.42981e-08	1.55373e-06
1731	hsa04064	NF-kappa B signaling pathway	2.73592e-08	2.22978e-06
1731	hsa05162	Measles	1.03839e-07	6.7703e-06
1738	hsa03010	Ribosome	5.43868e-07	0.000177301
1750	hsa03010	Ribosome	2.8127e-09	9.1694e-07
1750	hsa03008	Ribosome biogenesis in eukaryotes	0.000106621	0.0173792
1763	hsa03010	Ribosome	4.86444e-12	1.58581e-09
1765	hsa03010	Ribosome	4.44089e-16	1.44773e-13
1765	hsa03050	Proteasome	2.3252e-11	3.79007e-09
1765	hsa03040	Spliceosome	0.000396708	0.0431089
1767	hsa03008	Ribosome biogenesis in eukaryotes	0	0
1767	hsa03013	RNA transport	2.70894e-14	4.41558e-12
1779	hsa03010	Ribosome	0	0
1781	hsa04810	Regulation of actin cytoskeleton	1.57197e-08	4.75718e-06
1781	hsa04071	Sphingolipid signaling pathway	5.57124e-08	4.75718e-06
1781	hsa04270	Vascular smooth muscle contraction	6.32341e-08	4.75718e-06
1781	hsa04611	Platelet activation	6.86824e-08	4.75718e-06
1781	hsa05200	Pathways in cancer	7.29629e-08	4.75718e-06
1788	hsa04142	Lysosome	6.86824e-08	2.23905e-05
1788	hsa05170	Human immunodeficiency virus 1 infection	1.04852e-06	0.000170908
1793	hsa04141	Protein processing in endoplasmic reticulum	8.48782e-06	0.0022874
1793	hsa05134	Legionellosis	1.40331e-05	0.0022874
1795	hsa05143	African trypanosomiasis	0.000134257	0.0437678
1800	hsa04810	Regulation of actin cytoskeleton	1.57197e-08	5.12462e-06
1800	hsa04270	Vascular smooth muscle contraction	6.32341e-08	7.46349e-06
1800	hsa04611	Platelet activation	6.86824e-08	7.46349e-06
1800	hsa04530	Tight junction	3.48661e-07	2.84159e-05
1800	hsa05163	Human cytomegalovirus infection	5.66816e-05	0.00369564
1826	hsa01200	Carbon metabolism	0	0
1826	hsa00010	Glycolysis / Gluconeogenesis	6.66134e-16	1.0858e-13
1826	hsa01230	Biosynthesis of amino acids	1.55431e-15	1.68902e-13
1826	hsa00030	Pentose phosphate pathway	8.51119e-12	6.93662e-10
1826	hsa01100	Metabolic pathways	2.23097e-09	1.45459e-07
1831	hsa04310	Wnt signaling pathway	3.12668e-05	0.00281958
1831	hsa05224	Breast cancer	3.19149e-05	0.00281958
1831	hsa05226	Gastric cancer	3.25718e-05	0.00281958
1831	hsa04150	mTOR signaling pathway	3.45961e-05	0.00281958
1831	hsa05225	Hepatocellular carcinoma	4.68115e-05	0.00305211
1851	hsa00510	N-Glycan biosynthesis	4.56979e-05	0.0148975
1855	hsa03022	Basal transcription factors	3.74573e-05	0.0122111
1861	hsa04210	Apoptosis	1.13894e-07	3.71294e-05
1861	hsa04217	Necroptosis	2.73946e-07	4.46533e-05
1861	hsa05142	Chagas disease (American trypanosomiasis)	2.44795e-06	0.000266011
1861	hsa04668	TNF signaling pathway	3.31381e-06	0.000270076
1861	hsa05162	Measles	6.86789e-06	0.000447786
1870	hsa03050	Proteasome	1.97065e-13	6.42431e-11
1870	hsa03040	Spliceosome	6.95055e-12	1.13294e-09
1870	hsa03020	RNA polymerase	0.000351155	0.0381589
1872	hsa04330	Notch signaling pathway	1.25254e-08	4.08329e-06
1872	hsa05165	Human papillomavirus infection	0.000201899	0.0329095
1876	hsa03060	Protein export	9.51723e-05	0.0310262
1878	hsa00310	Lysine degradation	4.78092e-07	0.000155858
1878	hsa05202	Transcriptional misregulation in cancer	1.20395e-06	0.000196244
1900	hsa03020	RNA polymerase	1.34803e-09	4.39456e-07
1900	hsa00240	Pyrimidine metabolism	1.73569e-07	2.82917e-05
1900	hsa00230	Purine metabolism	1.55549e-06	0.00016903
1929	hsa05134	Legionellosis	4.05281e-06	0.00132122
1961	hsa01523	Antifolate resistance	1.75936e-05	0.00573551
1966	hsa04210	Apoptosis	0.000122861	0.0268075
1966	hsa05206	MicroRNAs in cancer	0.000164463	0.0268075
1966	hsa04215	Apoptosis	0.000278413	0.0302542
1967	hsa04120	Ubiquitin mediated proteolysis	6.22839e-05	0.0203045
1979	hsa04120	Ubiquitin mediated proteolysis	2.52599e-05	0.00823474
1986	hsa03010	Ribosome	1.50065e-08	4.8921e-06
1999	hsa04720	Long-term potentiation	0.000249468	0.0320894
1999	hsa05031	Amphetamine addiction	0.000257004	0.0320894
1999	hsa03015	mRNA surveillance pathway	0.000461017	0.0320894
1999	hsa04750	Inflammatory mediator regulation of TRP channels	0.000545724	0.0320894
1999	hsa04931	Insulin resistance	0.000637499	0.0320894
2002	hsa04961	Endocrine and other factor-regulated calcium reabsorption	4.7055e-11	1.53399e-08
2002	hsa04721	Synaptic vesicle cycle	2.94384e-10	4.79846e-08
2002	hsa04144	Endocytosis	6.32985e-10	6.87844e-08
2002	hsa05016	Huntington disease	2.61931e-07	2.13473e-05
2002	hsa04216	Ferroptosis	3.7662e-07	2.45556e-05
2012	hsa03013	RNA transport	5.84474e-09	1.90539e-06
2013	hsa05221	Acute myeloid leukemia	8.11575e-05	0.0264573
2014	hsa04110	Cell cycle	1.8522e-08	3.01908e-06
2014	hsa04114	Oocyte meiosis	1.8522e-08	3.01908e-06
2014	hsa04390	Hippo signaling pathway	6.8146e-08	7.4052e-06
2014	hsa05203	Viral carcinogenesis	3.33332e-07	2.71666e-05
2014	hsa05130	Pathogenic Escherichia coli infection	1.38698e-06	9.0431e-05
2023	hsa03018	RNA degradation	2.41204e-05	0.00786326
2030	hsa04110	Cell cycle	5.11534e-05	0.016676
2040	hsa04962	Vasopressin-regulated water reabsorption	3.57925e-05	0.0116684
2067	hsa04961	Endocrine and other factor-regulated calcium reabsorption	5.41589e-11	1.76558e-08
2067	hsa04721	Synaptic vesicle cycle	2.47711e-10	4.03769e-08
2067	hsa05016	Huntington disease	7.35222e-08	7.98942e-06
2067	hsa04144	Endocytosis	2.38642e-07	1.94493e-05
2072	hsa03010	Ribosome	0	0
2072	hsa00970	Aminoacyl-tRNA biosynthesis	0	0
2086	hsa03050	Proteasome	8.82478e-07	0.000287688
2099	hsa04666	Fc gamma R-mediated phagocytosis	6.56475e-10	2.14011e-07
2099	hsa04810	Regulation of actin cytoskeleton	1.87045e-09	3.04883e-07
2099	hsa05131	Shigellosis	1.18902e-08	1.29207e-06
2099	hsa05100	Bacterial invasion of epithelial cells	2.30686e-08	1.88009e-06
2099	hsa05132	Salmonella infection	4.95285e-08	3.22926e-06
2102	hsa00061	Fatty acid biosynthesis	8.84462e-06	0.00288334
2102	hsa01212	Fatty acid metabolism	0.000127496	0.0207818
2104	hsa01100	Metabolic pathways	0	0
2104	hsa04714	Thermogenesis	0	0
2104	hsa05016	Huntington disease	0	0
2104	hsa05010	Alzheimer disease	0	0
2104	hsa04932	Non-alcoholic fatty liver disease (NAFLD)	0	0
2106	hsa04144	Endocytosis	3.73429e-05	0.0121738
2108	hsa00100	Steroid biosynthesis	1.50812e-07	4.91648e-05
2108	hsa00900	Terpenoid backbone biosynthesis	8.69204e-05	0.014168
2108	hsa01100	Metabolic pathways	0.000185075	0.0201115
2109	hsa04146	Peroxisome	0	0
2109	hsa01040	Biosynthesis of unsaturated fatty acids	3.47323e-07	5.66136e-05
2138	hsa04350	TGF-beta signaling pathway	1.48788e-06	0.000485049
2138	hsa04550	Signaling pathways regulating pluripotency of stem cells	6.83929e-06	0.0011148
2139	hsa04350	TGF-beta signaling pathway	0.000131895	0.0429978
2144	hsa04330	Notch signaling pathway	8.32056e-09	2.7125e-06
2144	hsa05010	Alzheimer disease	0.000123466	0.0201249
2189	hsa04928	Parathyroid hormone synthesis, secretion and action	0.000210556	0.0231363
2189	hsa04071	Sphingolipid signaling pathway	0.00026118	0.0231363
2189	hsa04270	Vascular smooth muscle contraction	0.000274687	0.0231363
2189	hsa04611	Platelet activation	0.000283881	0.0231363
2189	hsa04072	Phospholipase D signaling pathway	0.000400491	0.026112
2191	hsa01100	Metabolic pathways	1.52167e-11	4.96065e-09
2191	hsa00230	Purine metabolism	1.85355e-09	3.02129e-07
2191	hsa00670	One carbon pool by folate	9.68519e-08	1.05246e-05
2191	hsa00250	Alanine, aspartate and glutamate metabolism	1.02441e-06	8.34892e-05
2191	hsa01523	Antifolate resistance	4.58356e-05	0.00298848
2199	hsa04142	Lysosome	4.72549e-06	0.00154051
2199	hsa05170	Human immunodeficiency virus 1 infection	2.44475e-05	0.00398494
2212	hsa00061	Fatty acid biosynthesis	1.76714e-05	0.00576087
2212	hsa01212	Fatty acid metabolism	0.000253916	0.0413883
2213	hsa04146	Peroxisome	7.82754e-08	2.55178e-05
2217	hsa01100	Metabolic pathways	8.0102e-06	0.00261133
2217	hsa00230	Purine metabolism	3.63501e-05	0.00592506
2217	hsa01200	Carbon metabolism	0.000309903	0.0336761
2217	hsa00020	Citrate cycle (TCA cycle)	0.000581944	0.0474285
2224	hsa04934	Cushing syndrome	3.67022e-05	0.0119649
2238	hsa04150	mTOR signaling pathway	7.26972e-11	2.36993e-08
2238	hsa04140	Autophagy	1.33792e-06	0.000218082
2238	hsa05213	Endometrial cancer	9.47336e-06	0.00100008
2238	hsa05223	Non-small cell lung cancer	1.40142e-05	0.00100008
2238	hsa04664	Fc epsilon RI signaling pathway	1.53387e-05	0.00100008
2239	hsa04140	Autophagy	9.16803e-08	2.91532e-05
2239	hsa04150	mTOR signaling pathway	1.78854e-07	2.91532e-05
2239	hsa04211	Longevity regulating pathway	7.03036e-06	0.000763965
2239	hsa04152	AMPK signaling pathway	1.73297e-05	0.00141237
2239	hsa04714	Thermogenesis	0.000120505	0.00785692
2240	hsa04150	mTOR signaling pathway	7.26972e-11	2.36993e-08
2240	hsa04140	Autophagy	1.33792e-06	0.000218082
2240	hsa05213	Endometrial cancer	9.47336e-06	0.00100008
2240	hsa05223	Non-small cell lung cancer	1.40142e-05	0.00100008
2240	hsa04664	Fc epsilon RI signaling pathway	1.53387e-05	0.00100008
2241	hsa01100	Metabolic pathways	5.92064e-06	0.00193013
2241	hsa00770	Pantothenate and CoA biosynthesis	0.000134812	0.0219744
2250	hsa00010	Glycolysis / Gluconeogenesis	4.55191e-15	1.48392e-12
2250	hsa01200	Carbon metabolism	2.1938e-13	3.5759e-11
2250	hsa01230	Biosynthesis of amino acids	6.82632e-12	7.41793e-10
2250	hsa01100	Metabolic pathways	5.92064e-06	0.000482533
2250	hsa04066	HIF-1 signaling pathway	8.48916e-05	0.00553493
2251	hsa00510	N-Glycan biosynthesis	1.14532e-06	0.000373373
2252	hsa00510	N-Glycan biosynthesis	1.82085e-09	5.93598e-07
2254	hsa00510	N-Glycan biosynthesis	0	0
2254	hsa01100	Metabolic pathways	5.67682e-06	0.000925322
2255	hsa00510	N-Glycan biosynthesis	2.87695e-07	9.37885e-05
2257	hsa05220	Chronic myeloid leukemia	0.000321299	0.0436987
2257	hsa01521	EGFR tyrosine kinase inhibitor resistance	0.000347245	0.0436987
2257	hsa04012	ErbB signaling pathway	0.000402135	0.0436987
2267	hsa04122	Sulfur relay system	3.496e-09	1.1397e-06
2273	hsa04392	Hippo signaling pathway	9.17118e-05	0.0298981
2280	hsa04120	Ubiquitin mediated proteolysis	6.40286e-06	0.00208733
2282	hsa04120	Ubiquitin mediated proteolysis	1.17169e-07	3.81969e-05
2297	hsa03050	Proteasome	0.000111929	0.0364888
2324	hsa04142	Lysosome	7.80213e-08	2.5435e-05
2324	hsa05170	Human immunodeficiency virus 1 infection	7.03017e-07	0.000114592
2338	hsa04330	Notch signaling pathway	1.14804e-07	3.7426e-05
2338	hsa04520	Adherens junction	6.00577e-07	6.09323e-05
2338	hsa05212	Pancreatic cancer	7.086e-07	6.09323e-05
2338	hsa05220	Chronic myeloid leukemia	7.47635e-07	6.09323e-05
2338	hsa04350	TGF-beta signaling pathway	1.12041e-06	6.69383e-05
2340	hsa03460	Fanconi anemia pathway	0	0
2376	hsa04390	Hippo signaling pathway	3.67022e-05	0.00804896
2376	hsa04530	Tight junction	4.93801e-05	0.00804896
2376	hsa04015	Rap1 signaling pathway	8.78039e-05	0.00954136
2376	hsa04144	Endocytosis	0.000145657	0.011871
2376	hsa05165	Human papillomavirus infection	0.000388041	0.0253003
2380	hsa04270	Vascular smooth muscle contraction	4.49687e-06	0.000770255
2380	hsa04611	Platelet activation	4.72549e-06	0.000770255
2380	hsa04810	Regulation of actin cytoskeleton	2.47967e-05	0.00238391
2380	hsa05163	Human cytomegalovirus infection	2.92504e-05	0.00238391
2380	hsa05200	Pathways in cancer	0.000372306	0.0242744
2383	hsa05225	Hepatocellular carcinoma	1.34334e-10	4.37929e-08
2383	hsa04714	Thermogenesis	9.15517e-10	1.49229e-07
2386	hsa04120	Ubiquitin mediated proteolysis	1.17169e-07	3.81969e-05
2414	hsa00310	Lysine degradation	9.97776e-06	0.00325275
2428	hsa04140	Autophagy	0	0
2428	hsa04136	Autophagy	0	0
2428	hsa04211	Longevity regulating pathway	0.000199945	0.0217274
2429	hsa04136	Autophagy	1.11022e-16	3.61933e-14
2429	hsa04140	Autophagy	7.32747e-15	1.19438e-12
2434	hsa04115	p53 signaling pathway	5.29854e-12	1.72732e-09
2434	hsa04110	Cell cycle	2.71997e-08	4.43356e-06
2434	hsa04218	Cellular senescence	9.82806e-08	1.06798e-05
2434	hsa01524	Platinum drug resistance	3.19985e-07	2.60788e-05
2434	hsa05219	Bladder cancer	5.73521e-06	0.000315409
2441	hsa04964	Proximal tubule bicarbonate reclamation	9.57242e-06	0.00312061
2441	hsa04960	Aldosterone-regulated sodium reabsorption	2.51986e-05	0.00314528
2441	hsa04973	Carbohydrate digestion and absorption	3.57925e-05	0.00314528
2441	hsa04961	Endocrine and other factor-regulated calcium reabsorption	4.09004e-05	0.00314528
2441	hsa04978	Mineral absorption	4.82405e-05	0.00314528
2446	hsa05110	Vibrio cholerae infection	7.76046e-14	2.52991e-11
2446	hsa04721	Synaptic vesicle cycle	3.31735e-13	5.40727e-11
2446	hsa05120	Epithelial cell signaling in Helicobacter pylori infection	5.34461e-13	5.80781e-11
2446	hsa05323	Rheumatoid arthritis	3.04001e-12	2.47761e-10
2446	hsa00190	Oxidative phosphorylation	3.34789e-11	2.18282e-09
2449	hsa05110	Vibrio cholerae infection	1.97919e-09	6.45215e-07
2449	hsa04721	Synaptic vesicle cycle	5.11912e-09	7.60535e-07
2449	hsa05120	Epithelial cell signaling in Helicobacter pylori infection	6.99879e-09	7.60535e-07
2449	hsa05323	Rheumatoid arthritis	2.19592e-08	1.78967e-06
2449	hsa00190	Oxidative phosphorylation	1.07059e-07	6.98023e-06
2450	hsa05120	Epithelial cell signaling in Helicobacter pylori infection	0	0
2450	hsa04721	Synaptic vesicle cycle	0	0
2450	hsa05110	Vibrio cholerae infection	0	0
2450	hsa04966	Collecting duct acid secretion	0	0
2450	hsa05323	Rheumatoid arthritis	4.44089e-16	2.89546e-14
2453	hsa04218	Cellular senescence	4.11659e-05	0.0134201
2456	hsa04141	Protein processing in endoplasmic reticulum	3.36526e-09	1.09708e-06
2457	hsa03018	RNA degradation	1.21555e-05	0.00396268
2461	hsa00250	Alanine, aspartate and glutamate metabolism	0.000134257	0.0437678
2463	hsa00534	Glycosaminoglycan biosynthesis	0	0
2463	hsa00532	Glycosaminoglycan biosynthesis	5.57437e-08	9.08622e-06
2463	hsa01100	Metabolic pathways	4.19324e-05	0.00455666
2463	hsa05205	Proteoglycans in cancer	0.00057521	0.0468796
2465	hsa03410	Base excision repair	8.51966e-08	1.81733e-05
2465	hsa03030	DNA replication	1.11493e-07	1.81733e-05
2465	hsa03420	Nucleotide excision repair	2.53201e-07	2.75145e-05
2465	hsa00240	Pyrimidine metabolism	2.60228e-06	0.000212085
2465	hsa00230	Purine metabolism	1.34747e-05	0.000878553
2467	hsa00601	Glycosphingolipid biosynthesis	3.97496e-05	0.0129584
2483	hsa04350	TGF-beta signaling pathway	0.000131895	0.0429978
2485	hsa03440	Homologous recombination	8.7031e-10	2.83721e-07
2485	hsa03460	Fanconi anemia pathway	1.54113e-06	0.000251204
2489	hsa04659	Th17 cell differentiation	1.22645e-05	0.00399823
2493	hsa04510	Focal adhesion	8.57593e-08	1.58707e-05
2493	hsa04810	Regulation of actin cytoskeleton	1.20686e-07	1.58707e-05
2493	hsa05100	Bacterial invasion of epithelial cells	1.46049e-07	1.58707e-05
2493	hsa05205	Proteoglycans in cancer	7.66923e-06	0.000625042
2493	hsa05163	Human cytomegalovirus infection	1.27579e-05	0.000831813
2494	hsa05100	Bacterial invasion of epithelial cells	1.01224e-06	0.000329991
2494	hsa04670	Leukocyte transendothelial migration	3.55902e-06	0.00058012
2494	hsa04062	Chemokine signaling pathway	1.72925e-05	0.00158927
2494	hsa04510	Focal adhesion	2.02014e-05	0.00158927
2494	hsa04810	Regulation of actin cytoskeleton	2.47967e-05	0.00158927
2499	hsa04064	NF-kappa B signaling pathway	1.35426e-07	4.41488e-05
2499	hsa04622	RIG-I-like receptor signaling pathway	8.43e-06	0.00137409
2499	hsa04625	C-type lectin receptor signaling pathway	2.78465e-05	0.00302598
2509	hsa01100	Metabolic pathways	6.04572e-12	1.9709e-09
2509	hsa00230	Purine metabolism	2.18201e-08	3.55668e-06
2509	hsa00670	One carbon pool by folate	5.57437e-08	6.05748e-06
2509	hsa01523	Antifolate resistance	3.57218e-07	2.91133e-05
2509	hsa00250	Alanine, aspartate and glutamate metabolism	5.91557e-07	3.85695e-05
2511	hsa04140	Autophagy	4.52144e-07	0.000125491
2511	hsa04136	Autophagy	7.69886e-07	0.000125491
2511	hsa04371	Apelin signaling pathway	6.3665e-05	0.00691826
2526	hsa04621	NOD-like receptor signaling pathway	9.56528e-10	3.11828e-07
2526	hsa04064	NF-kappa B signaling pathway	9.29091e-07	0.000151442
2526	hsa04668	TNF signaling pathway	1.67645e-06	0.000182174
2526	hsa04217	Necroptosis	7.88971e-06	0.000643011
2526	hsa04657	IL-17 signaling pathway	6.83251e-05	0.0044548
2537	hsa04350	TGF-beta signaling pathway	1.48788e-06	0.000485049
2537	hsa04550	Signaling pathways regulating pluripotency of stem cells	6.83929e-06	0.00101286
2537	hsa04390	Hippo signaling pathway	9.32079e-06	0.00101286
2547	hsa04024	cAMP signaling pathway	2.02014e-05	0.00658565
2547	hsa05216	Thyroid cancer	7.5353e-05	0.0080572
2547	hsa05219	Bladder cancer	9.27428e-05	0.0080572
2547	hsa05213	Endometrial cancer	0.000186663	0.0080572
2547	hsa04730	Long-term depression	0.000199839	0.0080572
2553	hsa04150	mTOR signaling pathway	1.78854e-07	5.83063e-05
2558	hsa01200	Carbon metabolism	6.15348e-08	2.00604e-05
2558	hsa00010	Glycolysis / Gluconeogenesis	3.10929e-06	0.000506815
2558	hsa00030	Pentose phosphate pathway	9.82446e-05	0.0106759
2577	hsa04961	Endocrine and other factor-regulated calcium reabsorption	0.000122195	0.0359316
2577	hsa04721	Synaptic vesicle cycle	0.000220439	0.0359316
2587	hsa04150	mTOR signaling pathway	1.78854e-07	5.83063e-05
2659	hsa03013	RNA transport	1.29508e-10	4.22195e-08
2659	hsa03008	Ribosome biogenesis in eukaryotes	9.0108e-10	1.46876e-07
2670	hsa00900	Terpenoid backbone biosynthesis	1.94673e-11	6.34635e-09
2670	hsa01100	Metabolic pathways	1.88926e-07	3.07949e-05
2713	hsa04141	Protein processing in endoplasmic reticulum	2.55866e-07	8.34123e-05
2733	hsa04210	Apoptosis	6.40286e-06	0.00177029
2733	hsa04217	Necroptosis	1.08607e-05	0.00177029
2733	hsa04115	p53 signaling pathway	0.000288261	0.0313244
2759	hsa04213	Longevity regulating pathway	1.1597e-05	0.00378062
2759	hsa04211	Longevity regulating pathway	3.45311e-05	0.00562857
2759	hsa04152	AMPK signaling pathway	8.45711e-05	0.00732853
2759	hsa04140	Autophagy	0.000102544	0.00732853
2759	hsa04068	FoxO signaling pathway	0.000112401	0.00732853
2795	hsa04218	Cellular senescence	4.11659e-05	0.0134201
2796	hsa03022	Basal transcription factors	0.000111929	0.0364888
2797	hsa05222	Small cell lung cancer	2.90784e-10	9.47957e-08
2797	hsa04110	Cell cycle	3.97785e-07	6.4839e-05
2797	hsa05200	Pathways in cancer	1.90973e-06	0.000207524
2797	hsa05169	Epstein-Barr virus infection	2.77443e-06	0.000226116
2797	hsa05215	Prostate cancer	2.25787e-05	0.00147213
2798	hsa05222	Small cell lung cancer	2.90784e-10	9.47957e-08
2798	hsa04110	Cell cycle	3.97785e-07	6.4839e-05
2798	hsa05200	Pathways in cancer	1.90973e-06	0.000207524
2798	hsa05169	Epstein-Barr virus infection	2.77443e-06	0.000226116
2798	hsa05215	Prostate cancer	2.25787e-05	0.00147213
2799	hsa04110	Cell cycle	8.06221e-08	2.62828e-05
2799	hsa04218	Cellular senescence	4.11659e-05	0.00671004
2799	hsa05219	Bladder cancer	0.000184822	0.020084
2799	hsa05223	Non-small cell lung cancer	0.000481247	0.0260083
2799	hsa05214	Glioma	0.000557015	0.0260083
2808	hsa04520	Adherens junction	9.18079e-06	0.00102417
2808	hsa05212	Pancreatic cancer	1.03881e-05	0.00102417
2808	hsa05220	Chronic myeloid leukemia	1.08128e-05	0.00102417
2808	hsa04350	TGF-beta signaling pathway	1.46312e-05	0.00102417
2808	hsa05210	Colorectal cancer	1.57081e-05	0.00102417
2810	hsa04662	B cell receptor signaling pathway	4.58424e-10	1.49446e-07
2820	hsa03020	RNA polymerase	5.26404e-05	0.0171608
2835	hsa04120	Ubiquitin mediated proteolysis	1.17169e-07	3.81969e-05
2839	hsa04390	Hippo signaling pathway	8.10964e-08	2.17226e-05
2839	hsa04530	Tight junction	1.33268e-07	2.17226e-05
2839	hsa04520	Adherens junction	3.02552e-07	3.28773e-05
2839	hsa04015	Rap1 signaling pathway	2.04891e-05	0.00166986
2839	hsa04144	Endocytosis	3.99971e-05	0.00260781
2848	hsa04520	Adherens junction	3.69864e-06	0.00120576
2848	hsa05213	Endometrial cancer	0.000371411	0.0493154
2848	hsa05412	Arrhythmogenic right ventricular cardiomyopathy (ARVC)	0.000572824	0.0493154
2848	hsa05100	Bacterial invasion of epithelial cells	0.000605097	0.0493154
2892	hsa00600	Sphingolipid metabolism	0.000122195	0.0398355
2893	hsa00061	Fatty acid biosynthesis	8.84462e-06	0.00288334
2893	hsa01212	Fatty acid metabolism	0.000127496	0.0207818
2895	hsa04064	NF-kappa B signaling pathway	8.56344e-06	0.00217303
2895	hsa04668	TNF signaling pathway	1.33315e-05	0.00217303
2895	hsa04621	NOD-like receptor signaling pathway	4.76576e-05	0.00517879
2895	hsa05140	Leishmaniasis	0.000605097	0.0493154
2908	hsa04144	Endocytosis	1.23826e-06	0.000403671
2908	hsa04217	Necroptosis	4.273e-05	0.00696499
2909	hsa04144	Endocytosis	1.23826e-06	0.000403671
2911	hsa04144	Endocytosis	9.15161e-09	2.98343e-06
2912	hsa04144	Endocytosis	1.34514e-09	4.38517e-07
2931	hsa00520	Amino sugar and nucleotide sugar metabolism	8.32056e-09	2.7125e-06
2931	hsa01100	Metabolic pathways	0.000185075	0.021524
2931	hsa00051	Fructose and mannose metabolism	0.000198074	0.021524
2960	hsa01100	Metabolic pathways	1.07179e-09	3.49405e-07
2969	hsa04714	Thermogenesis	1.77636e-15	5.79092e-13
2969	hsa00190	Oxidative phosphorylation	5.16916e-08	8.31864e-06
2969	hsa05012	Parkinson disease	7.65519e-08	8.31864e-06
2969	hsa04932	Non-alcoholic fatty liver disease (NAFLD)	1.02096e-07	8.32079e-06
2969	hsa04260	Cardiac muscle contraction	1.5021e-07	9.7937e-06
2970	hsa04714	Thermogenesis	9.15517e-10	2.98459e-07
2970	hsa00190	Oxidative phosphorylation	0.000114959	0.0187382
2982	hsa03050	Proteasome	8.82478e-07	0.000287688
2983	hsa03050	Proteasome	2.77112e-13	9.03384e-11
2989	hsa04714	Thermogenesis	0	0
2989	hsa05016	Huntington disease	0	0
2989	hsa05010	Alzheimer disease	0	0
2989	hsa04932	Non-alcoholic fatty liver disease (NAFLD)	0	0
2989	hsa04723	Retrograde endocannabinoid signaling	0	0
2990	hsa04714	Thermogenesis	2.43036e-08	7.92298e-06
2992	hsa04714	Thermogenesis	3.08456e-05	0.0100557
2995	hsa04714	Thermogenesis	9.15517e-10	2.98459e-07
2995	hsa04260	Cardiac muscle contraction	2.32117e-05	0.00378351
2995	hsa00190	Oxidative phosphorylation	0.000114959	0.0105119
2995	hsa05012	Parkinson disease	0.000139719	0.0105119
2995	hsa04932	Non-alcoholic fatty liver disease (NAFLD)	0.000161225	0.0105119
2999	hsa00860	Porphyrin and chlorophyll metabolism	1.11022e-16	3.61933e-14
2999	hsa01100	Metabolic pathways	5.92064e-06	0.000965065
3008	hsa04530	Tight junction	1.41678e-06	0.000461871
3008	hsa05165	Human papillomavirus infection	2.23727e-05	0.00364675
3008	hsa04390	Hippo signaling pathway	9.03271e-05	0.00981555
3008	hsa04015	Rap1 signaling pathway	0.000214918	0.0175158
3008	hsa04144	Endocytosis	0.000355101	0.0231526
3015	hsa04510	Focal adhesion	1.03688e-11	3.38023e-09
3015	hsa05100	Bacterial invasion of epithelial cells	1.96874e-09	3.20905e-07
3015	hsa04810	Regulation of actin cytoskeleton	4.12329e-07	4.4187e-05
3015	hsa05163	Human cytomegalovirus infection	5.42171e-07	4.4187e-05
3015	hsa04062	Chemokine signaling pathway	1.45625e-05	0.000949475
3022	hsa00020	Citrate cycle (TCA cycle)	1.17422e-09	3.82794e-07
3022	hsa01200	Carbon metabolism	3.03881e-07	4.95325e-05
3022	hsa00620	Pyruvate metabolism	1.41649e-06	0.000153925
3022	hsa00630	Glyoxylate and dicarboxylate metabolism	0.000163321	0.0120669
3022	hsa01100	Metabolic pathways	0.000185075	0.0120669
3036	hsa04137	Mitophagy	5.81845e-09	1.44114e-06
3036	hsa04520	Adherens junction	8.84138e-09	1.44114e-06
3036	hsa03008	Ribosome biogenesis in eukaryotes	1.42981e-08	1.55373e-06
3036	hsa04064	NF-kappa B signaling pathway	2.73592e-08	2.22978e-06
3036	hsa05162	Measles	1.03839e-07	6.7703e-06
3049	hsa05216	Thyroid cancer	7.5353e-05	0.0187946
3049	hsa05213	Endometrial cancer	0.000186663	0.0187946
3049	hsa05217	Basal cell carcinoma	0.000220439	0.0187946
3049	hsa04520	Adherens junction	0.000288261	0.0187946
3049	hsa05412	Arrhythmogenic right ventricular cardiomyopathy (ARVC)	0.000288261	0.0187946
3055	hsa05211	Renal cell carcinoma	8.18144e-07	0.000266715
3055	hsa04066	HIF-1 signaling pathway	2.52498e-06	0.000411572
3055	hsa05200	Pathways in cancer	0.000372306	0.0404573
3060	hsa04740	Olfactory transduction	4.95217e-06	0.00161441
3070	hsa04810	Regulation of actin cytoskeleton	1.20686e-07	3.93435e-05
3091	hsa04270	Vascular smooth muscle contraction	1.77685e-05	0.00536597
3091	hsa04921	Oxytocin signaling pathway	3.5289e-05	0.00536597
3091	hsa04530	Tight junction	4.93801e-05	0.00536597
3091	hsa05130	Pathogenic Escherichia coli infection	0.000333847	0.0272086
3091	hsa05131	Shigellosis	0.00046675	0.0304321
3103	hsa03018	RNA degradation	1.29124e-08	4.20945e-06
3107	hsa00670	One carbon pool by folate	2.15307e-05	0.00701902
3107	hsa01523	Antifolate resistance	5.26404e-05	0.00858038
3108	hsa04962	Vasopressin-regulated water reabsorption	3.57925e-05	0.0116684
3111	hsa04120	Ubiquitin mediated proteolysis	6.40286e-06	0.00208733
3122	hsa04115	p53 signaling pathway	3.69864e-06	0.00120576
3141	hsa04141	Protein processing in endoplasmic reticulum	1.14792e-05	0.00374222
3155	hsa05131	Shigellosis	7.86982e-05	0.0256556
3159	hsa00020	Citrate cycle (TCA cycle)	3.33067e-16	1.0858e-13
3159	hsa01200	Carbon metabolism	7.69118e-12	1.25366e-09
3159	hsa01100	Metabolic pathways	1.88926e-07	2.053e-05
3159	hsa00190	Oxidative phosphorylation	1.25593e-05	0.00102358
3159	hsa05012	Parkinson disease	1.62853e-05	0.0010618
3185	hsa04961	Endocrine and other factor-regulated calcium reabsorption	1.0082e-06	0.000201836
3185	hsa04144	Endocytosis	1.23826e-06	0.000201836
3185	hsa04721	Synaptic vesicle cycle	2.46503e-06	0.000267866
3218	hsa04310	Wnt signaling pathway	7.93378e-06	0.000715828
3218	hsa05224	Breast cancer	8.09907e-06	0.000715828
3218	hsa05226	Gastric cancer	8.26663e-06	0.000715828
3218	hsa04150	mTOR signaling pathway	8.78317e-06	0.000715828
3218	hsa05225	Hepatocellular carcinoma	1.19043e-05	0.000776163
3236	hsa00450	Selenocompound metabolism	1.05877e-07	3.45159e-05
3245	hsa04072	Phospholipase D signaling pathway	3.05024e-09	9.94379e-07
3245	hsa05205	Proteoglycans in cancer	1.42512e-08	2.32294e-06
3245	hsa04014	Ras signaling pathway	3.17121e-08	3.00585e-06
3245	hsa05211	Renal cell carcinoma	3.68816e-08	3.00585e-06
3245	hsa01521	EGFR tyrosine kinase inhibitor resistance	6.40291e-08	4.1747e-06
3255	hsa00970	Aminoacyl-tRNA biosynthesis	0.000106964	0.0348703
3256	hsa03013	RNA transport	1.16905e-05	0.0038111
3260	hsa03010	Ribosome	5.43868e-07	0.000177301
3269	hsa03460	Fanconi anemia pathway	2.71785e-09	8.86018e-07
3269	hsa03440	Homologous recombination	0.000184822	0.0301261
3273	hsa04150	mTOR signaling pathway	0	0
3296	hsa03460	Fanconi anemia pathway	0	0
3300	hsa04141	Protein processing in endoplasmic reticulum	1.25665e-06	0.000409669
3319	hsa03018	RNA degradation	1.21555e-05	0.00396268
3323	hsa04530	Tight junction	3.88106e-08	1.26523e-05
3323	hsa04390	Hippo signaling pathway	2.80962e-06	0.000457968
3323	hsa04015	Rap1 signaling pathway	8.98039e-06	0.000975869
3323	hsa04144	Endocytosis	1.76058e-05	0.00143487
3323	hsa05165	Human papillomavirus infection	6.46465e-05	0.00421495
3324	hsa04530	Tight junction	1.33268e-07	4.34452e-05
3324	hsa04520	Adherens junction	3.02552e-07	4.9316e-05
3324	hsa04390	Hippo signaling pathway	6.44765e-06	0.000700644
3324	hsa05120	Epithelial cell signaling in Helicobacter pylori infection	2.66629e-05	0.00217303
3324	hsa04670	Leukocyte transendothelial migration	0.00011906	0.00776274
3342	hsa04380	Osteoclast differentiation	1.56438e-09	1.98752e-07
3342	hsa05160	Hepatitis C	1.75972e-09	1.98752e-07
3342	hsa05162	Measles	1.82901e-09	1.98752e-07
3342	hsa04217	Necroptosis	5.16585e-09	3.16303e-07
3342	hsa04630	JAK-STAT signaling pathway	5.16585e-09	3.16303e-07
3356	hsa00514	Other types of O-glycan biosynthesis	5.2248e-05	0.0129287
3356	hsa00601	Glycosphingolipid biosynthesis	7.9317e-05	0.0129287
3372	hsa03010	Ribosome	2.41632e-10	7.87722e-08
3406	hsa01100	Metabolic pathways	1.07481e-12	3.50387e-10
3406	hsa00230	Purine metabolism	2.07503e-11	3.3823e-09
3406	hsa00250	Alanine, aspartate and glutamate metabolism	7.86052e-07	8.54176e-05
3406	hsa00670	One carbon pool by folate	9.7438e-06	0.00079412
3406	hsa00983	Drug metabolism	0.000624392	0.0407104
3451	hsa04010	MAPK signaling pathway	1.06399e-07	3.46862e-05
3451	hsa04912	GnRH signaling pathway	1.98887e-05	0.00324186
3451	hsa04218	Cellular senescence	0.000101249	0.0110024
3451	hsa05169	Epstein-Barr virus infection	0.000199782	0.0162822
3451	hsa05014	Amyotrophic lateral sclerosis (ALS)	0.000475933	0.0310308
3455	hsa00520	Amino sugar and nucleotide sugar metabolism	1.01248e-11	3.30068e-09
3455	hsa00052	Galactose metabolism	0.000174536	0.016143
3455	hsa01100	Metabolic pathways	0.000185075	0.016143
3455	hsa00051	Fructose and mannose metabolism	0.000198074	0.016143
3467	hsa04216	Ferroptosis	1.54278e-07	4.12717e-05
3467	hsa00270	Cysteine and methionine metabolism	2.53201e-07	4.12717e-05
3467	hsa00480	Glutathione metabolism	4.32854e-07	4.70368e-05
3469	hsa01100	Metabolic pathways	3.31128e-05	0.0107948
3469	hsa00630	Glyoxylate and dicarboxylate metabolism	0.000244352	0.0398294
3469	hsa00260	Glycine, serine and threonine metabolism	0.000436541	0.0474375
3472	hsa04150	mTOR signaling pathway	2.87548e-14	9.37406e-12
3480	hsa00520	Amino sugar and nucleotide sugar metabolism	2.67579e-06	0.000872306
3480	hsa01100	Metabolic pathways	0.000185075	0.0242419
3480	hsa00250	Alanine, aspartate and glutamate metabolism	0.000223085	0.0242419
3510	hsa04727	GABAergic synapse	1.71355e-06	0.000209481
3510	hsa05032	Morphine addiction	1.89701e-06	0.000209481
3510	hsa04713	Circadian entrainment	2.2311e-06	0.000209481
3510	hsa04725	Cholinergic synapse	3.55902e-06	0.000209481
3510	hsa04724	Glutamatergic synapse	3.7549e-06	0.000209481
3513	hsa00520	Amino sugar and nucleotide sugar metabolism	1.01248e-11	3.30068e-09
3524	hsa01200	Carbon metabolism	6.15348e-08	2.00604e-05
3524	hsa00020	Citrate cycle (TCA cycle)	2.52885e-07	4.12202e-05
3524	hsa00310	Lysine degradation	0.000384372	0.0417684
3565	hsa00480	Glutathione metabolism	4.32854e-07	0.00014111
3565	hsa00982	Drug metabolism	0.000288261	0.020331
3565	hsa01524	Platinum drug resistance	0.000296354	0.020331
3565	hsa00980	Metabolism of xenobiotics by cytochrome P450	0.000321299	0.020331
3565	hsa00983	Drug metabolism	0.000347245	0.020331
3574	hsa05322	Systemic lupus erythematosus	3.34789e-11	1.09141e-08
3574	hsa05034	Alcoholism	2.12032e-10	3.45612e-08
3574	hsa04217	Necroptosis	0.000206707	0.0224622
3576	hsa03440	Homologous recombination	6.63222e-07	0.00021621
3605	hsa05203	Viral carcinogenesis	0	0
3605	hsa05034	Alcoholism	0	0
3605	hsa05322	Systemic lupus erythematosus	0	0
3605	hsa04217	Necroptosis	1.08859e-08	8.872e-07
3605	hsa05202	Transcriptional misregulation in cancer	4.1037e-08	2.67561e-06
3606	hsa05322	Systemic lupus erythematosus	1.90045e-09	6.19547e-07
3606	hsa05034	Alcoholism	8.80356e-09	1.43498e-06
3606	hsa04217	Necroptosis	1.16732e-06	0.000126849
3609	hsa05203	Viral carcinogenesis	0	0
3609	hsa05034	Alcoholism	0	0
3609	hsa05322	Systemic lupus erythematosus	0	0
3610	hsa01200	Carbon metabolism	1.56467e-05	0.00510083
3610	hsa00500	Starch and sucrose metabolism	0.000142128	0.0231669
3610	hsa00520	Amino sugar and nucleotide sugar metabolism	0.000253916	0.0275922
3610	hsa05230	Central carbon metabolism in cancer	0.00046675	0.0333106
3610	hsa00010	Glycolysis / Gluconeogenesis	0.000510898	0.0333106
3622	hsa00510	N-Glycan biosynthesis	9.05916e-09	2.95329e-06
3622	hsa01100	Metabolic pathways	0.000185075	0.0301672
3672	hsa05225	Hepatocellular carcinoma	2.68617e-07	8.75693e-05
3672	hsa04714	Thermogenesis	9.5915e-07	0.000156341
3676	hsa04380	Osteoclast differentiation	2.64821e-11	3.47393e-09
3676	hsa05160	Hepatitis C	3.05155e-11	3.47393e-09
3676	hsa05162	Measles	3.19686e-11	3.47393e-09
3676	hsa04217	Necroptosis	1.11621e-10	7.22631e-09
3676	hsa04630	JAK-STAT signaling pathway	1.11621e-10	7.22631e-09
3694	hsa04064	NF-kappa B signaling pathway	2.0344e-09	3.28613e-07
3694	hsa04625	C-type lectin receptor signaling pathway	3.2256e-09	3.28613e-07
3694	hsa04659	Th17 cell differentiation	3.72749e-09	3.28613e-07
3694	hsa01523	Antifolate resistance	4.03206e-09	3.28613e-07
3694	hsa04380	Osteoclast differentiation	9.25388e-09	6.03353e-07
3699	hsa04064	NF-kappa B signaling pathway	1.35426e-07	4.41488e-05
3699	hsa04380	Osteoclast differentiation	4.52144e-07	7.36995e-05
3699	hsa04621	NOD-like receptor signaling pathway	1.35101e-06	0.000146809
3699	hsa04622	RIG-I-like receptor signaling pathway	8.43e-06	0.000650347
3699	hsa05140	Leishmaniasis	9.97465e-06	0.000650347
3700	hsa04010	MAPK signaling pathway	1.06399e-07	2.20744e-05
3700	hsa04064	NF-kappa B signaling pathway	1.35426e-07	2.20744e-05
3700	hsa05140	Leishmaniasis	9.97465e-06	0.00088124
3700	hsa05133	Pertussis	1.08128e-05	0.00088124
3700	hsa05142	Chagas disease (American trypanosomiasis)	2.62665e-05	0.00141262
3710	hsa04550	Signaling pathways regulating pluripotency of stem cells	1.27978e-07	3.87282e-05
3710	hsa04630	JAK-STAT signaling pathway	2.37596e-07	3.87282e-05
3710	hsa04659	Th17 cell differentiation	1.22645e-05	0.00133274
3710	hsa05167	Kaposi sarcoma-associated herpesvirus infection	6.46665e-05	0.00527032
3710	hsa05203	Viral carcinogenesis	8.15775e-05	0.00531885
3717	hsa04530	Tight junction	1.25615e-05	0.00409505
3717	hsa05165	Human papillomavirus infection	0.000100495	0.0163806
3718	hsa05202	Transcriptional misregulation in cancer	6.46665e-05	0.0210813
3723	hsa04930	Type II diabetes mellitus	0.000233067	0.046137
3723	hsa04923	Regulation of lipolysis in adipocytes	0.000321767	0.046137
3723	hsa04213	Longevity regulating pathway	0.000424573	0.046137
3728	hsa01100	Metabolic pathways	1.05796e-06	0.000344894
3733	hsa04623	Cytosolic DNA-sensing pathway	6.20096e-07	0.000139329
3733	hsa04622	RIG-I-like receptor signaling pathway	8.54777e-07	0.000139329
3733	hsa04621	NOD-like receptor signaling pathway	1.21208e-05	0.00131712
3733	hsa05170	Human immunodeficiency virus 1 infection	2.44475e-05	0.00190713
3733	hsa05163	Human cytomegalovirus infection	2.92504e-05	0.00190713
3737	hsa05162	Measles	4.36873e-12	1.42421e-09
3737	hsa05164	Influenza A	2.76357e-11	4.50461e-09
3737	hsa05169	Epstein-Barr virus infection	8.69796e-11	9.45179e-09
3737	hsa04380	Osteoclast differentiation	7.20308e-10	5.40781e-08
3737	hsa05160	Hepatitis C	8.29419e-10	5.40781e-08
3739	hsa03040	Spliceosome	5.82596e-05	0.0189926
3742	hsa05412	Arrhythmogenic right ventricular cardiomyopathy (ARVC)	8.84138e-09	1.71611e-06
3742	hsa04512	ECM-receptor interaction	1.50313e-08	1.71611e-06
3742	hsa05410	Hypertrophic cardiomyopathy (HCM)	1.57924e-08	1.71611e-06
3742	hsa05414	Dilated cardiomyopathy (DCM)	2.19592e-08	1.78967e-06
3742	hsa04510	Focal adhesion	5.44782e-07	3.55198e-05
3751	hsa00310	Lysine degradation	2.01881e-06	0.000658131
3751	hsa05202	Transcriptional misregulation in cancer	6.46665e-05	0.0105406
3757	hsa00310	Lysine degradation	9.97776e-06	0.00325275
3823	hsa03013	RNA transport	2.23805e-11	7.29606e-09
3825	hsa05219	Bladder cancer	6.63222e-07	8.03838e-05
3825	hsa04014	Ras signaling pathway	1.01075e-06	8.03838e-05
3825	hsa05213	Endometrial cancer	1.91635e-06	8.03838e-05
3825	hsa04370	VEGF signaling pathway	2.01881e-06	8.03838e-05
3825	hsa04730	Long-term depression	2.12484e-06	8.03838e-05
3866	hsa04530	Tight junction	3.88106e-08	1.26523e-05
3866	hsa04810	Regulation of actin cytoskeleton	1.02584e-05	0.00167212
3866	hsa05132	Salmonella infection	3.11474e-05	0.00338468
3866	hsa04670	Leukocyte transendothelial migration	6.88069e-05	0.00494676
3866	hsa04270	Vascular smooth muscle contraction	8.66941e-05	0.00494676
3886	hsa00970	Aminoacyl-tRNA biosynthesis	2.05062e-06	0.000668502
3896	hsa04390	Hippo signaling pathway	3.99715e-09	1.30307e-06
3896	hsa04530	Tight junction	1.41678e-06	0.000230936
3896	hsa05165	Human papillomavirus infection	2.23727e-05	0.00243117
3896	hsa04015	Rap1 signaling pathway	0.000214918	0.0175158
3896	hsa04144	Endocytosis	0.000355101	0.0231526
3902	hsa04810	Regulation of actin cytoskeleton	7.16472e-07	0.00023357
3902	hsa04270	Vascular smooth muscle contraction	1.77685e-05	0.00202858
3902	hsa04611	Platelet activation	1.86679e-05	0.00202858
3902	hsa05200	Pathways in cancer	2.66884e-05	0.0020386
3902	hsa04072	Phospholipase D signaling pathway	3.12668e-05	0.0020386
3908	hsa04350	TGF-beta signaling pathway	0.000131895	0.0429978
3908	hsa04550	Signaling pathways regulating pluripotency of stem cells	0.000362882	0.0484373
3908	hsa04390	Hippo signaling pathway	0.000445742	0.0484373
3930	hsa03018	RNA degradation	1.23484e-06	0.000402556
3930	hsa03040	Spliceosome	5.98541e-06	0.000975621
3950	hsa03440	Homologous recombination	6.63222e-07	0.00021621
3954	hsa04064	NF-kappa B signaling pathway	1.35426e-07	3.18511e-05
3954	hsa04625	C-type lectin receptor signaling pathway	1.95405e-07	3.18511e-05
3954	hsa04662	B cell receptor signaling pathway	8.80009e-06	0.000956276
3954	hsa04660	T cell receptor signaling pathway	2.54992e-05	0.00207819
3956	hsa04330	Notch signaling pathway	0.000127496	0.0415636
3957	hsa00510	N-Glycan biosynthesis	2.87695e-07	9.37885e-05
3958	hsa00510	N-Glycan biosynthesis	1.82085e-09	5.93598e-07
3960	hsa04141	Protein processing in endoplasmic reticulum	1.25665e-06	0.000409669
3962	hsa04912	GnRH signaling pathway	2.50921e-08	8.18002e-06
3962	hsa04010	MAPK signaling pathway	2.65706e-06	0.000433101
3962	hsa04012	ErbB signaling pathway	6.11706e-06	0.00066472
3962	hsa04620	Toll-like receptor signaling pathway	1.12558e-05	0.000869211
3962	hsa04668	TNF signaling pathway	1.33315e-05	0.000869211
3963	hsa04540	Gap junction	1.71355e-06	0.000558618
3963	hsa04010	MAPK signaling pathway	6.61354e-05	0.0107801
3971	hsa03015	mRNA surveillance pathway	1.89701e-06	0.000310647
3971	hsa05142	Chagas disease (American trypanosomiasis)	2.68113e-06	0.000310647
3971	hsa04071	Sphingolipid signaling pathway	4.16795e-06	0.000310647
3971	hsa04152	AMPK signaling pathway	4.38538e-06	0.000310647
3971	hsa04728	Dopaminergic synapse	5.71743e-06	0.000310647
3979	hsa00061	Fatty acid biosynthesis	1.76714e-05	0.00576087
3979	hsa01212	Fatty acid metabolism	0.000253916	0.0413883
3981	hsa03030	DNA replication	1.11493e-07	3.63466e-05
3981	hsa04110	Cell cycle	4.84265e-06	0.000789353
3982	hsa03440	Homologous recombination	4.43112e-12	1.44455e-09
3989	hsa04919	Thyroid hormone signaling pathway	3.95783e-06	0.00129025
4013	hsa05218	Melanoma	3.69864e-06	0.00120576
4013	hsa04380	Osteoclast differentiation	2.10476e-05	0.00245235
4013	hsa04650	Natural killer cell mediated cytotoxicity	2.25677e-05	0.00245235
4013	hsa05216	Thyroid cancer	0.000150222	0.0120504
4013	hsa05219	Bladder cancer	0.000184822	0.0120504
4031	hsa04141	Protein processing in endoplasmic reticulum	2.55866e-07	8.34123e-05
4031	hsa00510	N-Glycan biosynthesis	0.000264672	0.0431416
4044	hsa00970	Aminoacyl-tRNA biosynthesis	0	0
4044	hsa03010	Ribosome	1.72784e-12	2.81638e-10
4045	hsa00190	Oxidative phosphorylation	0.000114959	0.0131398
4045	hsa03010	Ribosome	0.000117554	0.0131398
4045	hsa05012	Parkinson disease	0.000139719	0.0131398
4045	hsa04932	Non-alcoholic fatty liver disease (NAFLD)	0.000161225	0.0131398
4045	hsa05010	Alzheimer disease	0.00024266	0.0158214
4047	hsa00970	Aminoacyl-tRNA biosynthesis	2.06808e-07	6.74194e-05
4058	hsa00670	One carbon pool by folate	1.78013e-08	5.80324e-06
4060	hsa04714	Thermogenesis	0	0
4060	hsa00190	Oxidative phosphorylation	8.91067e-08	1.14529e-05
4060	hsa05012	Parkinson disease	1.3182e-07	1.14529e-05
4060	hsa04723	Retrograde endocannabinoid signaling	1.68746e-07	1.14529e-05
4060	hsa04932	Non-alcoholic fatty liver disease (NAFLD)	1.75658e-07	1.14529e-05
4062	hsa04150	mTOR signaling pathway	0	0
4086	hsa04662	B cell receptor signaling pathway	8.35019e-09	2.72216e-06
4086	hsa05340	Primary immunodeficiency	0.000150222	0.0244863
4087	hsa04270	Vascular smooth muscle contraction	4.49687e-06	0.000770255
4087	hsa04611	Platelet activation	4.72549e-06	0.000770255
4087	hsa04810	Regulation of actin cytoskeleton	2.47967e-05	0.00238391
4087	hsa05163	Human cytomegalovirus infection	2.92504e-05	0.00238391
4087	hsa05200	Pathways in cancer	0.000372306	0.0242744
4091	hsa04622	RIG-I-like receptor signaling pathway	3.39547e-06	0.000930561
4091	hsa05222	Small cell lung cancer	7.7718e-06	0.000930561
4091	hsa04064	NF-kappa B signaling pathway	8.56344e-06	0.000930561
4091	hsa04668	TNF signaling pathway	1.33315e-05	0.00108651
4091	hsa04217	Necroptosis	4.273e-05	0.0025894
4101	hsa00520	Amino sugar and nucleotide sugar metabolism	1.07531e-06	0.00035055
4121	hsa00534	Glycosaminoglycan biosynthesis	0	0
4121	hsa00532	Glycosaminoglycan biosynthesis	1.35719e-08	2.21222e-06
4121	hsa01100	Metabolic pathways	7.32361e-06	0.000795832
4128	hsa04064	NF-kappa B signaling pathway	2.16138e-06	0.00070461
4128	hsa05169	Epstein-Barr virus infection	2.08198e-05	0.00226241
4128	hsa05203	Viral carcinogenesis	2.08198e-05	0.00226241
4128	hsa04622	RIG-I-like receptor signaling pathway	0.00027241	0.0222014
4128	hsa05200	Pathways in cancer	0.000372306	0.0224256
4129	hsa04622	RIG-I-like receptor signaling pathway	3.39547e-06	0.000930561
4129	hsa05222	Small cell lung cancer	7.7718e-06	0.000930561
4129	hsa04064	NF-kappa B signaling pathway	8.56344e-06	0.000930561
4129	hsa04668	TNF signaling pathway	1.33315e-05	0.00108651
4129	hsa04621	NOD-like receptor signaling pathway	4.76576e-05	0.00310728
4130	hsa04622	RIG-I-like receptor signaling pathway	8.54777e-07	0.000278657
4130	hsa04623	Cytosolic DNA-sensing pathway	0.000220439	0.0165476
4130	hsa05131	Shigellosis	0.00023473	0.0165476
4130	hsa04920	Adipocytokine signaling pathway	0.000264651	0.0165476
4130	hsa04662	B cell receptor signaling pathway	0.00028028	0.0165476
4152	hsa04330	Notch signaling pathway	8.32056e-09	2.7125e-06
4152	hsa05010	Alzheimer disease	0.000123466	0.0201249
4161	hsa04142	Lysosome	7.80213e-08	2.5435e-05
4161	hsa04979	Cholesterol metabolism	0.00027565	0.0449309
4188	hsa04270	Vascular smooth muscle contraction	1.77685e-05	0.00536597
4188	hsa04921	Oxytocin signaling pathway	3.5289e-05	0.00536597
4188	hsa04530	Tight junction	4.93801e-05	0.00536597
4188	hsa05130	Pathogenic Escherichia coli infection	0.000333847	0.0272086
4188	hsa05131	Shigellosis	0.00046675	0.0304321
4192	hsa05322	Systemic lupus erythematosus	1.07059e-07	3.49011e-05
4192	hsa05034	Alcoholism	3.63497e-07	5.925e-05
4195	hsa03013	RNA transport	8.89441e-10	2.89958e-07
4211	hsa00330	Arginine and proline metabolism	3.06058e-07	9.9775e-05
4211	hsa00270	Cysteine and methionine metabolism	0.000122195	0.0189009
4211	hsa00480	Glutathione metabolism	0.000173935	0.0189009
4265	hsa00534	Glycosaminoglycan biosynthesis	0	0
4265	hsa00532	Glycosaminoglycan biosynthesis	8.65191e-09	1.41026e-06
4265	hsa01100	Metabolic pathways	1.58581e-06	0.000172325
4291	hsa01100	Metabolic pathways	3.31128e-05	0.0107948
4291	hsa00770	Pantothenate and CoA biosynthesis	9.64447e-05	0.0157205
4291	hsa04216	Ferroptosis	0.000436541	0.0474375
4291	hsa00270	Cysteine and methionine metabolism	0.000603446	0.0491809
4300	hsa04714	Thermogenesis	0	0
4300	hsa00190	Oxidative phosphorylation	1.17462e-13	1.91462e-11
4300	hsa05012	Parkinson disease	2.14495e-13	2.33085e-11
4300	hsa04932	Non-alcoholic fatty liver disease (NAFLD)	3.33733e-13	2.71992e-11
4300	hsa05010	Alzheimer disease	1.17728e-12	7.67587e-11
4303	hsa01200	Carbon metabolism	3.03881e-07	9.90651e-05
4303	hsa00010	Glycolysis / Gluconeogenesis	7.72111e-06	0.00125854
4303	hsa00030	Pentose phosphate pathway	0.000163321	0.0128304
4303	hsa00052	Galactose metabolism	0.000174536	0.0128304
4303	hsa00051	Fructose and mannose metabolism	0.000198074	0.0128304
4304	hsa00563	Glycosylphosphatidylinositol (GPI)-anchor biosynthesis	0	0
4304	hsa01100	Metabolic pathways	1.90958e-13	3.11262e-11
4330	hsa00480	Glutathione metabolism	0.000173935	0.0359316
4330	hsa00590	Arachidonic acid metabolism	0.000220439	0.0359316
4362	hsa03020	RNA polymerase	2.7995e-07	9.12638e-05
4362	hsa00240	Pyrimidine metabolism	1.03038e-05	0.00167953
4362	hsa00230	Purine metabolism	5.29479e-05	0.00575367
4368	hsa03010	Ribosome	5.95813e-05	0.0194235
4370	hsa03020	RNA polymerase	2.70409e-10	8.81533e-08
4370	hsa04623	Cytosolic DNA-sensing pathway	5.11912e-09	8.34416e-07
4370	hsa00240	Pyrimidine metabolism	3.50885e-08	3.81295e-06
4370	hsa00230	Purine metabolism	3.17031e-07	2.5838e-05
4371	hsa03020	RNA polymerase	1.00475e-12	3.27549e-10
4371	hsa04623	Cytosolic DNA-sensing pathway	4.15616e-11	6.77455e-09
4371	hsa00240	Pyrimidine metabolism	4.68361e-10	5.08953e-08
4371	hsa00230	Purine metabolism	7.41644e-09	6.0444e-07
4386	hsa04115	p53 signaling pathway	9.31292e-07	0.000303601
4394	hsa03015	mRNA surveillance pathway	1.89701e-06	0.000310647
4394	hsa05142	Chagas disease (American trypanosomiasis)	2.68113e-06	0.000310647
4394	hsa04071	Sphingolipid signaling pathway	4.16795e-06	0.000310647
4394	hsa04152	AMPK signaling pathway	4.38538e-06	0.000310647
4394	hsa04728	Dopaminergic synapse	5.71743e-06	0.000310647
4405	hsa05225	Hepatocellular carcinoma	1.19043e-05	0.00388081
4405	hsa04714	Thermogenesis	3.08456e-05	0.00502783
4440	hsa03050	Proteasome	8.82478e-07	0.000287688
4441	hsa03050	Proteasome	1.28046e-09	4.17429e-07
4441	hsa05169	Epstein-Barr virus infection	5.67187e-07	9.24515e-05
4464	hsa03020	RNA polymerase	1.75936e-05	0.00573551
4464	hsa00240	Pyrimidine metabolism	0.00019107	0.0311444
4481	hsa03440	Homologous recombination	1.11022e-16	3.61933e-14
4481	hsa03460	Fanconi anemia pathway	1.32732e-05	0.00216353
4492	hsa04510	Focal adhesion	2.74003e-13	8.9325e-11
4492	hsa05100	Bacterial invasion of epithelial cells	5.20844e-09	8.48976e-07
4492	hsa04015	Rap1 signaling pathway	9.08959e-07	8.74776e-05
4492	hsa04810	Regulation of actin cytoskeleton	1.07334e-06	8.74776e-05
4492	hsa05163	Human cytomegalovirus infection	1.40936e-06	9.189e-05
4493	hsa04390	Hippo signaling pathway	9.03271e-05	0.019776
4493	hsa04530	Tight junction	0.000121325	0.019776
4493	hsa04015	Rap1 signaling pathway	0.000214918	0.0233544
4502	hsa04390	Hippo signaling pathway	9.52255e-07	0.000230936
4502	hsa04530	Tight junction	1.41678e-06	0.000230936
4502	hsa04015	Rap1 signaling pathway	3.06149e-06	0.000332682
4502	hsa04144	Endocytosis	6.0277e-06	0.000491258
4502	hsa05165	Human papillomavirus infection	2.23727e-05	0.0014587
4509	hsa04330	Notch signaling pathway	1.01248e-11	3.30068e-09
4509	hsa05010	Alzheimer disease	1.45056e-06	0.000236441
4511	hsa04014	Ras signaling pathway	0.000125285	0.0124494
4511	hsa05219	Bladder cancer	0.000184822	0.0124494
4511	hsa05213	Endometrial cancer	0.000371411	0.0124494
4511	hsa04370	VEGF signaling pathway	0.000384372	0.0124494
4511	hsa04730	Long-term depression	0.000397553	0.0124494
4525	hsa00983	Drug metabolism	0.000116572	0.0380024
4526	hsa04150	mTOR signaling pathway	3.61793e-09	1.17945e-06
4526	hsa04140	Autophagy	5.19408e-05	0.00846635
4529	hsa05131	Shigellosis	7.86982e-05	0.0166576
4529	hsa05100	Bacterial invasion of epithelial cells	0.000102194	0.0166576
4530	hsa04662	B cell receptor signaling pathway	1.59234e-09	5.19103e-07
4548	hsa04520	Adherens junction	9.6708e-05	0.00874357
4548	hsa05212	Pancreatic cancer	0.000104994	0.00874357
4548	hsa05220	Chronic myeloid leukemia	0.000107832	0.00874357
4548	hsa04350	TGF-beta signaling pathway	0.000131895	0.00874357
4548	hsa05210	Colorectal cancer	0.000138289	0.00874357
4561	hsa01100	Metabolic pathways	3.39728e-14	1.10751e-11
4561	hsa00230	Purine metabolism	3.2687e-09	5.32797e-07
4561	hsa00670	One carbon pool by folate	1.24304e-07	1.35077e-05
4561	hsa00030	Pentose phosphate pathway	4.96133e-05	0.00357583
4561	hsa01523	Antifolate resistance	5.4844e-05	0.00357583
4562	hsa00030	Pentose phosphate pathway	5.0413e-12	1.64346e-09
4562	hsa01200	Carbon metabolism	5.61786e-09	9.15711e-07
4562	hsa01230	Biosynthesis of amino acids	1.54243e-07	1.67611e-05
4562	hsa01100	Metabolic pathways	3.31128e-05	0.00269869
4562	hsa00040	Pentose and glucuronate interconversions	0.000314667	0.0205163
4566	hsa03010	Ribosome	1.16694e-08	3.80423e-06
4568	hsa04115	p53 signaling pathway	9.18079e-06	0.00156028
4568	hsa01524	Platinum drug resistance	9.57226e-06	0.00156028
4568	hsa04110	Cell cycle	4.72252e-05	0.0051318
4568	hsa05206	MicroRNAs in cancer	8.34959e-05	0.00660143
4568	hsa04218	Cellular senescence	0.000101249	0.00660143
4571	hsa03010	Ribosome	2.41588e-05	0.00787578
4576	hsa03010	Ribosome	2.41632e-10	7.87722e-08
4578	hsa04141	Protein processing in endoplasmic reticulum	1.14792e-05	0.00374222
4578	hsa00510	N-Glycan biosynthesis	0.000132909	0.0216641
4579	hsa03013	RNA transport	5.84474e-09	1.90539e-06
4579	hsa03008	Ribosome biogenesis in eukaryotes	7.08845e-08	1.15542e-05
4580	hsa03010	Ribosome	1.10353e-07	3.5975e-05
4585	hsa03010	Ribosome	2.41588e-05	0.00787578
4586	hsa03050	Proteasome	8.82478e-07	0.000287688
4604	hsa04392	Hippo signaling pathway	2.2762e-07	7.4204e-05
4604	hsa04390	Hippo signaling pathway	3.67022e-05	0.00598246
4631	hsa04141	Protein processing in endoplasmic reticulum	1.14792e-05	0.00374222
4632	hsa04141	Protein processing in endoplasmic reticulum	2.55866e-07	8.34123e-05
4637	hsa03013	RNA transport	2.62183e-07	8.54718e-05
4646	hsa03040	Spliceosome	5.82596e-05	0.0189926
4650	hsa00670	One carbon pool by folate	7.18878e-06	0.00234354
4739	hsa04350	TGF-beta signaling pathway	1.48788e-06	0.000485049
4739	hsa04550	Signaling pathways regulating pluripotency of stem cells	6.83929e-06	0.00101286
4739	hsa04390	Hippo signaling pathway	9.32079e-06	0.00101286
4740	hsa04350	TGF-beta signaling pathway	1.48788e-06	0.000485049
4742	hsa05225	Hepatocellular carcinoma	1.34334e-10	4.37929e-08
4742	hsa04714	Thermogenesis	9.15517e-10	1.49229e-07
4743	hsa05225	Hepatocellular carcinoma	6.02513e-09	1.96419e-06
4743	hsa04714	Thermogenesis	2.96971e-08	4.84063e-06
4751	hsa03013	RNA transport	1.28754e-06	0.000419738
4754	hsa04350	TGF-beta signaling pathway	0.000131895	0.0429978
4758	hsa04144	Endocytosis	1.34514e-09	4.38517e-07
4759	hsa03050	Proteasome	1.50321e-10	4.90046e-08
4760	hsa03010	Ribosome	2.15552e-11	7.027e-09
4762	hsa03050	Proteasome	1.50321e-10	4.90046e-08
4793	hsa01521	EGFR tyrosine kinase inhibitor resistance	0.000116572	0.0380024
4798	hsa00600	Sphingolipid metabolism	0.000122195	0.0398355
4799	hsa05100	Bacterial invasion of epithelial cells	9.0461e-13	2.94903e-10
4799	hsa04510	Focal adhesion	3.90309e-10	6.36203e-08
4799	hsa04062	Chemokine signaling pathway	6.617e-08	7.19047e-06
4799	hsa04810	Regulation of actin cytoskeleton	1.20686e-07	9.83588e-06
4799	hsa05163	Human cytomegalovirus infection	1.58913e-07	1.03611e-05
4809	hsa04141	Protein processing in endoplasmic reticulum	2.55866e-07	8.34123e-05
4818	hsa04144	Endocytosis	4.08946e-08	1.33317e-05
4826	hsa05130	Pathogenic Escherichia coli infection	0.000167739	0.0335513
4826	hsa05131	Shigellosis	0.00023473	0.0335513
4826	hsa05200	Pathways in cancer	0.000372306	0.0335513
4826	hsa05132	Salmonella infection	0.000411672	0.0335513
4826	hsa04670	Leukocyte transendothelial migration	0.000698442	0.0343193
4838	hsa04115	p53 signaling pathway	9.6708e-05	0.0315268
4849	hsa03022	Basal transcription factors	3.9746e-14	1.29572e-11
4849	hsa05168	Herpes simplex infection	5.84938e-06	0.000953448
4850	hsa03022	Basal transcription factors	3.9746e-14	1.29572e-11
4850	hsa05168	Herpes simplex infection	5.94168e-08	9.68493e-06
4862	hsa04520	Adherens junction	9.6708e-05	0.0315268
4862	hsa04670	Leukocyte transendothelial migration	0.000235187	0.0383354
4866	hsa05130	Pathogenic Escherichia coli infection	5.6186e-05	0.0183166
4866	hsa04540	Gap junction	0.000144835	0.0236081
4866	hsa04210	Apoptosis	0.000347331	0.0353875
4866	hsa04145	Phagosome	0.000434202	0.0353875
4866	hsa04530	Tight junction	0.000543509	0.0354368
4893	hsa04520	Adherens junction	9.6708e-05	0.00874357
4893	hsa05212	Pancreatic cancer	0.000104994	0.00874357
4893	hsa05220	Chronic myeloid leukemia	0.000107832	0.00874357
4893	hsa04350	TGF-beta signaling pathway	0.000131895	0.00874357
4893	hsa05210	Colorectal cancer	0.000138289	0.00874357
4943	hsa04141	Protein processing in endoplasmic reticulum	3.36526e-09	1.09708e-06
4958	hsa04622	RIG-I-like receptor signaling pathway	0.00027241	0.0439275
4958	hsa04657	IL-17 signaling pathway	0.00048153	0.0439275
4958	hsa04064	NF-kappa B signaling pathway	0.000502486	0.0439275
4958	hsa04625	C-type lectin receptor signaling pathway	0.000602256	0.0439275
4958	hsa04668	TNF signaling pathway	0.000673734	0.0439275
4968	hsa04510	Focal adhesion	3.90309e-10	9.24184e-08
4968	hsa05100	Bacterial invasion of epithelial cells	5.66984e-10	9.24184e-08
4968	hsa04062	Chemokine signaling pathway	6.37062e-06	0.00066885
4968	hsa04015	Rap1 signaling pathway	8.98039e-06	0.00066885
4968	hsa04810	Regulation of actin cytoskeleton	1.02584e-05	0.00066885
5035	hsa04115	p53 signaling pathway	3.69864e-06	0.00120576
5036	hsa05216	Thyroid cancer	0.000150222	0.0189151
5036	hsa05219	Bladder cancer	0.000184822	0.0189151
5036	hsa05213	Endometrial cancer	0.000371411	0.0189151
5036	hsa05217	Basal cell carcinoma	0.000438413	0.0189151
5036	hsa05223	Non-small cell lung cancer	0.000481247	0.0189151
5039	hsa00900	Terpenoid backbone biosynthesis	9.32476e-13	3.03987e-10
5039	hsa01100	Metabolic pathways	3.31128e-05	0.00539738
5050	hsa04140	Autophagy	0	0
5050	hsa04136	Autophagy	0	0
5050	hsa04211	Longevity regulating pathway	9.63487e-06	0.00104699
5060	hsa03460	Fanconi anemia pathway	1.86999e-11	6.09618e-09
5071	hsa04115	p53 signaling pathway	4.38759e-08	1.43036e-05
5071	hsa04110	Cell cycle	4.72252e-05	0.00769771
5071	hsa04218	Cellular senescence	0.000101249	0.0110024
5071	hsa05169	Epstein-Barr virus infection	0.000199782	0.0130258
5071	hsa05203	Viral carcinogenesis	0.000199782	0.0130258
5081	hsa04510	Focal adhesion	1.46185e-08	4.76562e-06
5081	hsa04810	Regulation of actin cytoskeleton	3.49994e-06	0.000570489
5081	hsa05100	Bacterial invasion of epithelial cells	9.97465e-06	0.00108391
5081	hsa05205	Proteoglycans in cancer	0.000191047	0.0155703
5081	hsa05165	Human papillomavirus infection	0.000936544	0.045607
5087	hsa04150	mTOR signaling pathway	5.96103e-06	0.0019433
5093	hsa04810	Regulation of actin cytoskeleton	1.57197e-08	5.12462e-06
5093	hsa05130	Pathogenic Escherichia coli infection	2.00603e-07	3.26982e-05
5093	hsa05131	Shigellosis	3.96464e-07	4.30824e-05
5093	hsa05100	Bacterial invasion of epithelial cells	6.71106e-07	5.46951e-05
5093	hsa05132	Salmonella infection	1.23199e-06	8.03259e-05
5113	hsa04392	Hippo signaling pathway	2.2762e-07	7.4204e-05
5113	hsa04390	Hippo signaling pathway	3.67022e-05	0.00598246
5114	hsa00510	N-Glycan biosynthesis	0	0
5114	hsa01100	Metabolic pathways	2.46066e-05	0.00401087
5117	hsa04115	p53 signaling pathway	0.000288261	0.0483057
5117	hsa01524	Platinum drug resistance	0.000296354	0.0483057
5126	hsa04110	Cell cycle	8.06221e-08	1.31414e-05
5126	hsa04114	Oocyte meiosis	8.06221e-08	1.31414e-05
5126	hsa04390	Hippo signaling pathway	1.93649e-07	2.10432e-05
5126	hsa05203	Viral carcinogenesis	5.67187e-07	4.62257e-05
5126	hsa04151	PI3K-Akt signaling pathway	5.52853e-06	0.00036046
5127	hsa04110	Cell cycle	8.06221e-08	1.31414e-05
5127	hsa04114	Oocyte meiosis	8.06221e-08	1.31414e-05
5127	hsa04390	Hippo signaling pathway	1.93649e-07	2.10432e-05
5127	hsa05203	Viral carcinogenesis	5.67187e-07	4.62257e-05
5127	hsa04151	PI3K-Akt signaling pathway	5.52853e-06	0.00036046
5130	hsa00310	Lysine degradation	6.47368e-05	0.0211042
5130	hsa04211	Longevity regulating pathway	0.000148164	0.0241508
5140	hsa05202	Transcriptional misregulation in cancer	1.64778e-05	0.00537176
5140	hsa00310	Lysine degradation	0.000193195	0.0314908
5161	hsa03050	Proteasome	0.000111929	0.0364888

## Sheet: Supplementary file 1e
Supplementary file 1e: Number of co-essential modules significantly enriched with indicated KEGG pathways or hallmark genesets. Rankings of individual pathways/genesets were based on number of co-essential modules.																	Mitra et al.
Database	Pathway/Geneset	Rank	Number of co-essential modules
HALLMARK	HALLMARK_MYC_TARGETS_V1	1	50
HALLMARK	HALLMARK_E2F_TARGETS	2	47
KEGG	Metabolic pathways	3	45
KEGG	Ribosome	4	30
KEGG	Hippo signaling pathway	5	29
KEGG	Cell cycle	6	27
KEGG	Proteasome	7	27
KEGG	Regulation of actin cytoskeleton	8	26
KEGG	Spliceosome	9	25
HALLMARK	HALLMARK_OXIDATIVE_PHOSPHORYLATION	10	24
KEGG	Endocytosis	11	23
KEGG	NF-kappa B signaling pathway	12	21
KEGG	Cellular senescence	13	20
KEGG	Adherens junction	14	19
HALLMARK	HALLMARK_G2M_CHECKPOINT	15	19
KEGG	mTOR signaling pathway	16	19
KEGG	Protein processing in endoplasmic reticulum	17	19
KEGG	RNA degradation	18	19
KEGG	RNA transport	19	19
KEGG	Autophagy	20	18
KEGG	Ribosome biogenesis in eukaryotes	21	18
KEGG	Thermogenesis	22	18
KEGG	Tight junction	23	18
HALLMARK	HALLMARK_UNFOLDED_PROTEIN_RESPONSE	24	17
KEGG	N-Glycan biosynthesis	25	17
KEGG	p53 signaling pathway	26	17
KEGG	Carbon metabolism	27	16
KEGG	Epstein-Barr virus infection	28	16
KEGG	Purine metabolism	29	16
KEGG	TGF-beta signaling pathway	30	15
HALLMARK	HALLMARK_MTORC1_SIGNALING	31	14
KEGG	Pyrimidine metabolism	32	14
KEGG	Transcriptional misregulation in cancer	33	14
KEGG	Vascular smooth muscle contraction	34	14
KEGG	Bacterial invasion of epithelial cells	35	13
KEGG	Fanconi anemia pathway	36	13
HALLMARK	HALLMARK_MITOTIC_SPINDLE	37	13
HALLMARK	HALLMARK_MYC_TARGETS_V2	38	13
KEGG	Longevity regulating pathway	39	13
KEGG	Lysine degradation	40	13
KEGG	Necroptosis	41	13
KEGG	RNA polymerase	42	13
HALLMARK	HALLMARK_PROTEIN_SECRETION	43	12
HALLMARK	HALLMARK_TGF_BETA_SIGNALING	44	12
KEGG	Homologous recombination	45	12
KEGG	Notch signaling pathway	46	12
KEGG	Osteoclast differentiation	47	12
KEGG	Pathways in cancer	48	12
KEGG	Platelet activation	49	12
KEGG	Ubiquitin mediated proteolysis	50	12
KEGG	Viral carcinogenesis	51	12
KEGG	Basal transcription factors	52	11
KEGG	Bladder cancer	53	11
KEGG	Chronic myeloid leukemia	54	11
KEGG	Endometrial cancer	55	11
KEGG	Focal adhesion	56	11
HALLMARK	HALLMARK_INTERFERON_GAMMA_RESPONSE	57	11
KEGG	Shigellosis	58	11
KEGG	Alzheimer disease	59	10
KEGG	Antifolate resistance	60	10
HALLMARK	HALLMARK_PI3K_AKT_MTOR_SIGNALING	61	10
KEGG	Hepatocellular carcinoma	62	10
KEGG	Human cytomegalovirus infection	63	10
KEGG	Human papillomavirus infection	64	10
KEGG	Measles	65	10
KEGG	One carbon pool by folate	66	10
KEGG	Oxidative phosphorylation	67	10
KEGG	Rap1 signaling pathway	68	10
KEGG	RIG-I-like receptor signaling pathway	69	10
KEGG	Synaptic vesicle cycle	70	10
KEGG	TNF signaling pathway	71	10
KEGG	Amino sugar and nucleotide sugar metabolism	72	9
KEGG	Apoptosis	73	9
KEGG	DNA replication	74	9
KEGG	Endocrine and other factor-regulated calcium reabsorption	75	9
HALLMARK	HALLMARK_GLYCOLYSIS	76	9
HALLMARK	HALLMARK_HYPOXIA	77	9
HALLMARK	HALLMARK_IL6_JAK_STAT3_SIGNALING	78	9
HALLMARK	HALLMARK_WNT_BETA_CATENIN_SIGNALING	79	9
KEGG	mRNA surveillance pathway	80	9
KEGG	Non-alcoholic fatty liver disease (NAFLD)	81	9
KEGG	Platinum drug resistance	82	9
KEGG	Thyroid cancer	83	9
KEGG	Aminoacyl-tRNA biosynthesis	84	8
KEGG	AMPK signaling pathway	85	8
KEGG	EGFR tyrosine kinase inhibitor resistance	86	8
KEGG	Fatty acid biosynthesis	87	8
KEGG	Glycosaminoglycan biosynthesis	88	8
KEGG	Leukocyte transendothelial migration	89	8
KEGG	MAPK signaling pathway	90	8
KEGG	MicroRNAs in cancer	91	8
KEGG	Pathogenic Escherichia coli infection	92	8
KEGG	Sphingolipid signaling pathway	93	8
Database	Acute myeloid leukemia	94	7
KEGG	Alcoholism	95	7
KEGG	Glycolysis / Gluconeogenesis	96	7
HALLMARK	HALLMARK_INTERFERON_ALPHA_RESPONSE	97	7
HALLMARK	HALLMARK_P53_PATHWAY	98	7
KEGG	Hepatitis C	99	7
KEGG	Human immunodeficiency virus 1 infection	100	7
KEGG	Huntington disease	101	7
KEGG	JAK-STAT signaling pathway	102	7
KEGG	Melanoma	103	7
KEGG	NOD-like receptor signaling pathway	104	7
KEGG	Non-small cell lung cancer	105	7
KEGG	Nucleotide excision repair	106	7
KEGG	Oocyte meiosis	107	7
KEGG	Pancreatic cancer	108	7
KEGG	Parkinson disease	109	7
KEGG	Pentose phosphate pathway	110	7
KEGG	Phagosome	111	7
KEGG	Renal cell carcinoma	112	7
KEGG	Signaling pathways regulating pluripotency of stem cells	113	7
KEGG	Systemic lupus erythematosus	114	7
KEGG	Alanine, aspartate and glutamate metabolism	115	6
KEGG	B cell receptor signaling pathway	116	6
KEGG	Biosynthesis of amino acids	117	6
KEGG	Chagas disease (American trypanosomiasis)	118	6
KEGG	Citrate cycle (TCA cycle)	119	6
KEGG	Cytosolic DNA-sensing pathway	120	6
KEGG	Fatty acid metabolism	121	6
KEGG	GnRH signaling pathway	122	6
HALLMARK	HALLMARK_DNA_REPAIR	123	6
KEGG	Human T-cell leukemia virus 1 infection	124	6
KEGG	Lysosome	125	6
KEGG	Natural killer cell mediated cytotoxicity	126	6
KEGG	Olfactory transduction	127	6
KEGG	Prostate cancer	128	6
KEGG	Ras signaling pathway	129	6
KEGG	Salmonella infection	130	6
KEGG	Small cell lung cancer	131	6
KEGG	Vasopressin-regulated water reabsorption	132	6
KEGG	C-type lectin receptor signaling pathway	133	5
KEGG	Chemokine signaling pathway	134	5
KEGG	Epithelial cell signaling in Helicobacter pylori infection	135	5
KEGG	ErbB signaling pathway	136	5
HALLMARK	HALLMARK_ADIPOGENESIS	137	5
HALLMARK	HALLMARK_ANGIOGENESIS	138	5
HALLMARK	HALLMARK_APOPTOSIS	139	5
HALLMARK	HALLMARK_NOTCH_SIGNALING	140	5
HALLMARK	HALLMARK_UV_RESPONSE_DN	141	5
KEGG	Herpes simplex infection	142	5
KEGG	Mitophagy	143	5
KEGG	PI3K-Akt signaling pathway	144	5
KEGG	Proteoglycans in cancer	145	5
KEGG	Th17 cell differentiation	146	5
KEGG	Thyroid hormone signaling pathway	147	5
KEGG	Arrhythmogenic right ventricular cardiomyopathy (ARVC)	148	4
KEGG	Asthma	149	4
KEGG	Breast cancer	150	4
KEGG	Colorectal cancer	151	4
KEGG	Cushing syndrome	152	4
KEGG	Dopaminergic synapse	153	4
KEGG	Drug metabolism	154	4
KEGG	Ferroptosis	155	4
KEGG	Gap junction	156	4
KEGG	Gastric cancer	157	4
KEGG	Glutathione metabolism	158	4
HALLMARK	HALLMARK_CHOLESTEROL_HOMEOSTASIS	159	4
HALLMARK	HALLMARK_HEME_METABOLISM	160	4
HALLMARK	HALLMARK_TNFA_SIGNALING_VIA_NFKB	161	4
KEGG	HIF-1 signaling pathway	162	4
KEGG	Insulin resistance	163	4
KEGG	Legionellosis	164	4
KEGG	Long-term depression	165	4
KEGG	Oxytocin signaling pathway	166	4
KEGG	Phospholipase D signaling pathway	167	4
KEGG	Progesterone-mediated oocyte maturation	168	4
KEGG	Rheumatoid arthritis	169	4
KEGG	Terpenoid backbone biosynthesis	170	4
KEGG	Vibrio cholerae infection	171	4
KEGG	Wnt signaling pathway	172	4
KEGG	Adipocytokine signaling pathway	173	3
KEGG	Allograft rejection	174	3
KEGG	Amyotrophic lateral sclerosis (ALS)	175	3
KEGG	Base excision repair	176	3
KEGG	Cysteine and methionine metabolism	177	3
KEGG	Estrogen signaling pathway	178	3
KEGG	Fc epsilon RI signaling pathway	179	3
KEGG	Fructose and mannose metabolism	180	3
KEGG	Glioma	181	3
KEGG	Graft-versus-host disease	182	3
HALLMARK	HALLMARK_APICAL_JUNCTION	183	3
HALLMARK	HALLMARK_COMPLEMENT	184	3
HALLMARK	HALLMARK_FATTY_ACID_METABOLISM	185	3
KEGG	IL-17 signaling pathway	186	3
KEGG	Influenza A	187	3
KEGG	Intestinal immune network for IgA production	188	3
KEGG	Leishmaniasis	189	3
KEGG	Long-term potentiation	190	3
KEGG	Retrograde endocannabinoid signaling	191	3
KEGG	Sphingolipid metabolism	192	3
KEGG	Type I diabetes mellitus	193	3
KEGG	Aldosterone-regulated sodium reabsorption	194	2
KEGG	Amphetamine addiction	195	2
KEGG	Arachidonic acid metabolism	196	2
KEGG	Arginine and proline metabolism	197	2
KEGG	Axon guidance	198	2
KEGG	Basal cell carcinoma	199	2
KEGG	Biosynthesis of unsaturated fatty acids	200	2
KEGG	cAMP signaling pathway	201	2
KEGG	Cardiac muscle contraction	202	2
KEGG	Cholinergic synapse	203	2
KEGG	Collecting duct acid secretion	204	2
KEGG	Cytokine-cytokine receptor interaction	205	2
KEGG	Dilated cardiomyopathy (DCM)	206	2
KEGG	Endocrine resistance	207	2
KEGG	Fc gamma R-mediated phagocytosis	208	2
KEGG	FoxO signaling pathway	209	2
KEGG	GABAergic synapse	210	2
KEGG	Galactose metabolism	211	2
KEGG	Glycosphingolipid biosynthesis	212	2
KEGG	Glycosylphosphatidylinositol (GPI)-anchor biosynthesis	213	2
KEGG	Glyoxylate and dicarboxylate metabolism	214	2
HALLMARK	HALLMARK_ALLOGRAFT_REJECTION	215	2
HALLMARK	HALLMARK_ANDROGEN_RESPONSE	216	2
HALLMARK	HALLMARK_PANCREAS_BETA_CELLS	217	2
HALLMARK	HALLMARK_REACTIVE_OXIGEN_SPECIES_PATHWAY	218	2
KEGG	Hypertrophic cardiomyopathy (HCM)	219	2
KEGG	Inflammatory mediator regulation of TRP channels	220	2
KEGG	Kaposi sarcoma-associated herpesvirus infection	221	2
KEGG	Metabolism of xenobiotics by cytochrome P450	222	2
KEGG	Morphine addiction	223	2
KEGG	Non-homologous end-joining	224	2
KEGG	Other types of O-glycan biosynthesis	225	2
KEGG	Ovarian steroidogenesis	226	2
KEGG	Pantothenate and CoA biosynthesis	227	2
KEGG	Peroxisome	228	2
KEGG	Regulation of lipolysis in adipocytes	229	2
KEGG	Selenocompound metabolism	230	2
KEGG	Starch and sucrose metabolism	231	2
KEGG	Steroid biosynthesis	232	2
KEGG	Sulfur relay system	233	2
KEGG	Taste transduction	234	2
KEGG	Toll-like receptor signaling pathway	235	2
KEGG	VEGF signaling pathway	236	2
KEGG	Adrenergic signaling in cardiomyocytes	237	1
KEGG	African trypanosomiasis	238	1
KEGG	alpha-Linolenic acid metabolism	239	1
KEGG	Amoebiasis	240	1
KEGG	Apelin signaling pathway	241	1
KEGG	Arginine biosynthesis	242	1
KEGG	Butanoate metabolism	243	1
KEGG	Carbohydrate digestion and absorption	244	1
KEGG	Central carbon metabolism in cancer	245	1
KEGG	Cholesterol metabolism	246	1
KEGG	Choline metabolism in cancer	247	1
KEGG	Circadian entrainment	248	1
KEGG	Cortisol synthesis and secretion	249	1
KEGG	ECM-receptor interaction	250	1
KEGG	Ether lipid metabolism	251	1
KEGG	Fatty acid elongation	252	1
KEGG	Glutamatergic synapse	253	1
KEGG	Glycine, serine and threonine metabolism	254	1
HALLMARK	HALLMARK_BILE_ACID_METABOLISM	255	1
HALLMARK	HALLMARK_EPITHELIAL_MESENCHYMAL_TRANSITION	256	1
HALLMARK	HALLMARK_HEDGEHOG_SIGNALING	257	1
HALLMARK	HALLMARK_IL2_STAT5_SIGNALING	258	1
HALLMARK	HALLMARK_PEROXISOME	259	1
HALLMARK	HALLMARK_UV_RESPONSE_UP	260	1
HALLMARK	HALLMARK_XENOBIOTIC_METABOLISM	261	1
KEGG	Insulin signaling pathway	262	1
KEGG	Maturity onset diabetes of the young	263	1
KEGG	Mineral absorption	264	1
KEGG	Mismatch repair	265	1
KEGG	Neuroactive ligand-receptor interaction	266	1
KEGG	Neurotrophin signaling pathway	267	1
KEGG	Nicotine addiction	268	1
KEGG	Nitrogen metabolism	269	1
KEGG	Parathyroid hormone synthesis, secretion and action	270	1
KEGG	Pentose and glucuronate interconversions	271	1
KEGG	Pertussis	272	1
KEGG	Phenylalanine, tyrosine and tryptophan biosynthesis	273	1
KEGG	Porphyrin and chlorophyll metabolism	274	1
KEGG	Primary immunodeficiency	275	1
KEGG	Protein export	276	1
KEGG	Proximal tubule bicarbonate reclamation	277	1
KEGG	Pyruvate metabolism	278	1
KEGG	Renin secretion	279	1
KEGG	Salivary secretion	280	1
KEGG	Serotonergic synapse	281	1
KEGG	SNARE interactions in vesicular transport	282	1
KEGG	Steroid hormone biosynthesis	283	1
KEGG	T cell receptor signaling pathway	284	1
KEGG	Th1 and Th2 cell differentiation	285	1
KEGG	Thyroid hormone synthesis	286	1
KEGG	Type II diabetes mellitus	287	1

## Sheet: Supplementary file 1f
Supplementary file 1f: Networks of lncRNA and co-essential modules. Co-essential module details can be obtained from PubMed ID: 33859415.														Mitra et al.
Ensembl ID	Symbol	Module number	Direction of regulation
ENSG00000099869	IGF2-AS	581	neg
ENSG00000099869	IGF2-AS	795	neg
ENSG00000099869	IGF2-AS	1526	neg
ENSG00000099869	IGF2-AS	471	pos
ENSG00000099869	IGF2-AS	1360	neg
ENSG00000099869	IGF2-AS	1779	neg
ENSG00000099869	IGF2-AS	1528	neg
ENSG00000099869	IGF2-AS	176	neg
ENSG00000099869	IGF2-AS	559	neg
ENSG00000099869	IGF2-AS	757	neg
ENSG00000099869	IGF2-AS	725	neg
ENSG00000099869	IGF2-AS	1580	neg
ENSG00000099869	IGF2-AS	2030	neg
ENSG00000099869	IGF2-AS	226	neg
ENSG00000099869	IGF2-AS	1496	neg
ENSG00000099869	IGF2-AS	976	neg
ENSG00000099869	IGF2-AS	1105	neg
ENSG00000099869	IGF2-AS	755	neg
ENSG00000099869	IGF2-AS	1325	neg
ENSG00000099869	IGF2-AS	715	neg
ENSG00000099869	IGF2-AS	544	neg
ENSG00000099869	IGF2-AS	836	neg
ENSG00000099869	IGF2-AS	868	neg
ENSG00000099869	IGF2-AS	952	neg
ENSG00000099869	IGF2-AS	1501	neg
ENSG00000099869	IGF2-AS	479	neg
ENSG00000099869	IGF2-AS	1674	neg
ENSG00000099869	IGF2-AS	1870	neg
ENSG00000099869	IGF2-AS	1765	neg
ENSG00000099869	IGF2-AS	1036	neg
ENSG00000099869	IGF2-AS	1503	neg
ENSG00000099869	IGF2-AS	1448	neg
ENSG00000099869	IGF2-AS	223	neg
ENSG00000099869	IGF2-AS	779	neg
ENSG00000116883	AL591845.1	505	neg
ENSG00000116883	AL591845.1	1683	neg
ENSG00000116883	AL591845.1	492	pos
ENSG00000116883	AL591845.1	1696	pos
ENSG00000116883	AL591845.1	1800	pos
ENSG00000116883	AL591845.1	1303	neg
ENSG00000116883	AL591845.1	2030	neg
ENSG00000116883	AL591845.1	1424	neg
ENSG00000116883	AL591845.1	584	neg
ENSG00000116883	AL591845.1	757	neg
ENSG00000116883	AL591845.1	868	neg
ENSG00000116883	AL591845.1	725	neg
ENSG00000116883	AL591845.1	1168	neg
ENSG00000116883	AL591845.1	836	neg
ENSG00000116883	AL591845.1	197	neg
ENSG00000116883	AL591845.1	715	neg
ENSG00000116883	AL591845.1	1325	neg
ENSG00000116883	AL591845.1	544	neg
ENSG00000116883	AL591845.1	1528	neg
ENSG00000116883	AL591845.1	1503	neg
ENSG00000116883	AL591845.1	1036	neg
ENSG00000116883	AL591845.1	1674	neg
ENSG00000116883	AL591845.1	1870	neg
ENSG00000116883	AL591845.1	795	neg
ENSG00000116883	AL591845.1	779	neg
ENSG00000116883	AL591845.1	1105	neg
ENSG00000116883	AL591845.1	176	neg
ENSG00000116883	AL591845.1	952	neg
ENSG00000116883	AL591845.1	367	neg
ENSG00000116883	AL591845.1	1526	neg
ENSG00000116883	AL591845.1	1448	neg
ENSG00000116883	AL591845.1	1501	neg
ENSG00000116883	AL591845.1	935	neg
ENSG00000116883	AL591845.1	471	pos
ENSG00000116883	AL591845.1	976	neg
ENSG00000116883	AL591845.1	479	neg
ENSG00000116883	AL591845.1	226	neg
ENSG00000116883	AL591845.1	1986	neg
ENSG00000116883	AL591845.1	1580	neg
ENSG00000116883	AL591845.1	1765	neg
ENSG00000116883	AL591845.1	223	neg
ENSG00000116883	AL591845.1	1779	neg
ENSG00000116883	AL591845.1	559	neg
ENSG00000128254	C22orf24	1569	pos
ENSG00000128254	C22orf24	1013	pos
ENSG00000128254	C22orf24	329	pos
ENSG00000128254	C22orf24	1639	pos
ENSG00000128254	C22orf24	2592	pos
ENSG00000128254	C22orf24	1448	pos
ENSG00000128254	C22orf24	471	neg
ENSG00000128254	C22orf24	507	pos
ENSG00000128254	C22orf24	726	pos
ENSG00000128254	C22orf24	474	pos
ENSG00000128254	C22orf24	1498	pos
ENSG00000128254	C22orf24	403	pos
ENSG00000128254	C22orf24	755	pos
ENSG00000128254	C22orf24	505	pos
ENSG00000128254	C22orf24	354	pos
ENSG00000128254	C22orf24	268	pos
ENSG00000128254	C22orf24	518	pos
ENSG00000128254	C22orf24	560	pos
ENSG00000128254	C22orf24	1399	pos
ENSG00000146666	LINC00525	280	neg
ENSG00000146666	LINC00525	958	neg
ENSG00000146666	LINC00525	1569	neg
ENSG00000146666	LINC00525	1013	neg
ENSG00000146666	LINC00525	1503	neg
ENSG00000146666	LINC00525	2592	neg
ENSG00000146666	LINC00525	329	neg
ENSG00000146666	LINC00525	197	neg
ENSG00000146666	LINC00525	779	neg
ENSG00000146666	LINC00525	403	neg
ENSG00000146666	LINC00525	1496	neg
ENSG00000146666	LINC00525	176	neg
ENSG00000146666	LINC00525	2014	pos
ENSG00000146666	LINC00525	1986	neg
ENSG00000146666	LINC00525	223	neg
ENSG00000146666	LINC00525	1696	pos
ENSG00000146666	LINC00525	1765	neg
ENSG00000146666	LINC00525	367	neg
ENSG00000146666	LINC00525	479	neg
ENSG00000146666	LINC00525	474	neg
ENSG00000146666	LINC00525	1448	neg
ENSG00000146666	LINC00525	755	neg
ENSG00000146666	LINC00525	492	pos
ENSG00000146666	LINC00525	976	neg
ENSG00000146666	LINC00525	1498	neg
ENSG00000146666	LINC00525	354	neg
ENSG00000146666	LINC00525	1526	neg
ENSG00000146666	LINC00525	507	neg
ENSG00000146666	LINC00525	226	neg
ENSG00000146666	LINC00525	795	neg
ENSG00000146666	LINC00525	1580	neg
ENSG00000146666	LINC00525	1800	pos
ENSG00000146666	LINC00525	505	neg
ENSG00000146666	LINC00525	726	neg
ENSG00000146666	LINC00525	518	neg
ENSG00000146666	LINC00525	560	neg
ENSG00000146666	LINC00525	268	neg
ENSG00000146666	LINC00525	471	pos
ENSG00000146666	LINC00525	1399	neg
ENSG00000146666	LINC00525	1779	neg
ENSG00000146666	LINC00525	559	neg
ENSG00000163009	C2orf48	1201	pos
ENSG00000163009	C2orf48	492	neg
ENSG00000163009	C2orf48	329	pos
ENSG00000163009	C2orf48	1781	neg
ENSG00000163009	C2orf48	595	pos
ENSG00000163009	C2orf48	1569	pos
ENSG00000163009	C2orf48	868	pos
ENSG00000163009	C2orf48	1674	pos
ENSG00000163009	C2orf48	280	pos
ENSG00000163009	C2orf48	197	pos
ENSG00000163009	C2orf48	1639	pos
ENSG00000163009	C2orf48	581	pos
ENSG00000163009	C2orf48	1800	neg
ENSG00000163009	C2orf48	1360	pos
ENSG00000163009	C2orf48	1013	pos
ENSG00000163009	C2orf48	1500	pos
ENSG00000163009	C2orf48	283	pos
ENSG00000163009	C2orf48	976	pos
ENSG00000163009	C2orf48	1501	pos
ENSG00000163009	C2orf48	1496	pos
ENSG00000163009	C2orf48	1105	pos
ENSG00000163009	C2orf48	1448	pos
ENSG00000163009	C2orf48	474	pos
ENSG00000163009	C2orf48	505	pos
ENSG00000163009	C2orf48	1498	pos
ENSG00000163009	C2orf48	1503	pos
ENSG00000163009	C2orf48	795	pos
ENSG00000163009	C2orf48	779	pos
ENSG00000163009	C2orf48	176	pos
ENSG00000163009	C2orf48	726	pos
ENSG00000163009	C2orf48	2592	pos
ENSG00000163009	C2orf48	223	pos
ENSG00000163009	C2orf48	403	pos
ENSG00000163009	C2orf48	1765	pos
ENSG00000163009	C2orf48	479	pos
ENSG00000163009	C2orf48	226	pos
ENSG00000163009	C2orf48	755	pos
ENSG00000163009	C2orf48	1580	pos
ENSG00000163009	C2orf48	507	pos
ENSG00000163009	C2orf48	471	neg
ENSG00000163009	C2orf48	1779	pos
ENSG00000163009	C2orf48	518	pos
ENSG00000163009	C2orf48	560	pos
ENSG00000163009	C2orf48	1399	pos
ENSG00000163009	C2orf48	354	pos
ENSG00000163009	C2orf48	268	pos
ENSG00000163009	C2orf48	559	pos
ENSG00000163597	SNHG16	1500	pos
ENSG00000163597	SNHG16	197	pos
ENSG00000163597	SNHG16	2030	pos
ENSG00000163597	SNHG16	868	pos
ENSG00000163597	SNHG16	779	pos
ENSG00000163597	SNHG16	1303	pos
ENSG00000163597	SNHG16	725	pos
ENSG00000163597	SNHG16	1039	pos
ENSG00000163597	SNHG16	584	pos
ENSG00000163597	SNHG16	757	pos
ENSG00000163597	SNHG16	1325	pos
ENSG00000163597	SNHG16	952	pos
ENSG00000163597	SNHG16	1168	pos
ENSG00000163597	SNHG16	1674	pos
ENSG00000163597	SNHG16	1036	pos
ENSG00000163597	SNHG16	715	pos
ENSG00000163597	SNHG16	1503	pos
ENSG00000163597	SNHG16	836	pos
ENSG00000163597	SNHG16	1870	pos
ENSG00000163597	SNHG16	1501	pos
ENSG00000163597	SNHG16	958	pos
ENSG00000163597	SNHG16	1105	pos
ENSG00000163597	SNHG16	479	pos
ENSG00000163597	SNHG16	1528	pos
ENSG00000163597	SNHG16	223	pos
ENSG00000163597	SNHG16	367	pos
ENSG00000163597	SNHG16	226	pos
ENSG00000163597	SNHG16	1765	pos
ENSG00000163597	SNHG16	1986	pos
ENSG00000163597	SNHG16	795	pos
ENSG00000163597	SNHG16	976	pos
ENSG00000163597	SNHG16	935	pos
ENSG00000163597	SNHG16	1580	pos
ENSG00000163597	SNHG16	1526	pos
ENSG00000163597	SNHG16	1779	pos
ENSG00000163597	SNHG16	559	pos
ENSG00000175147	TMEM51-AS1	757	neg
ENSG00000175147	TMEM51-AS1	1619	neg
ENSG00000175147	TMEM51-AS1	1500	neg
ENSG00000175147	TMEM51-AS1	1498	neg
ENSG00000175147	TMEM51-AS1	1569	neg
ENSG00000175147	TMEM51-AS1	795	neg
ENSG00000175147	TMEM51-AS1	1360	neg
ENSG00000175147	TMEM51-AS1	581	neg
ENSG00000175147	TMEM51-AS1	1168	neg
ENSG00000175147	TMEM51-AS1	976	neg
ENSG00000175147	TMEM51-AS1	544	neg
ENSG00000175147	TMEM51-AS1	283	neg
ENSG00000175147	TMEM51-AS1	354	neg
ENSG00000175147	TMEM51-AS1	1303	neg
ENSG00000175147	TMEM51-AS1	1325	neg
ENSG00000175147	TMEM51-AS1	367	neg
ENSG00000175147	TMEM51-AS1	1526	neg
ENSG00000175147	TMEM51-AS1	474	neg
ENSG00000175147	TMEM51-AS1	1496	neg
ENSG00000175147	TMEM51-AS1	1639	neg
ENSG00000175147	TMEM51-AS1	403	neg
ENSG00000175147	TMEM51-AS1	1039	neg
ENSG00000175147	TMEM51-AS1	726	neg
ENSG00000175147	TMEM51-AS1	725	neg
ENSG00000175147	TMEM51-AS1	755	neg
ENSG00000175147	TMEM51-AS1	952	neg
ENSG00000175147	TMEM51-AS1	2030	neg
ENSG00000175147	TMEM51-AS1	584	neg
ENSG00000175147	TMEM51-AS1	176	neg
ENSG00000175147	TMEM51-AS1	715	neg
ENSG00000175147	TMEM51-AS1	935	neg
ENSG00000175147	TMEM51-AS1	1448	neg
ENSG00000175147	TMEM51-AS1	471	pos
ENSG00000175147	TMEM51-AS1	507	neg
ENSG00000175147	TMEM51-AS1	1528	neg
ENSG00000175147	TMEM51-AS1	505	neg
ENSG00000175147	TMEM51-AS1	868	neg
ENSG00000175147	TMEM51-AS1	836	neg
ENSG00000175147	TMEM51-AS1	1986	neg
ENSG00000175147	TMEM51-AS1	197	neg
ENSG00000175147	TMEM51-AS1	1674	neg
ENSG00000175147	TMEM51-AS1	518	neg
ENSG00000175147	TMEM51-AS1	1036	neg
ENSG00000175147	TMEM51-AS1	560	neg
ENSG00000175147	TMEM51-AS1	1105	neg
ENSG00000175147	TMEM51-AS1	268	neg
ENSG00000175147	TMEM51-AS1	1870	neg
ENSG00000175147	TMEM51-AS1	1399	neg
ENSG00000175147	TMEM51-AS1	1503	neg
ENSG00000175147	TMEM51-AS1	1580	neg
ENSG00000175147	TMEM51-AS1	226	neg
ENSG00000175147	TMEM51-AS1	1501	neg
ENSG00000175147	TMEM51-AS1	779	neg
ENSG00000175147	TMEM51-AS1	479	neg
ENSG00000175147	TMEM51-AS1	1765	neg
ENSG00000175147	TMEM51-AS1	1779	neg
ENSG00000175147	TMEM51-AS1	223	neg
ENSG00000175147	TMEM51-AS1	559	neg
ENSG00000175611	LINC00476	1399	pos
ENSG00000175611	LINC00476	471	neg
ENSG00000176124	DLEU1	492	neg
ENSG00000176124	DLEU1	1423	pos
ENSG00000176124	DLEU1	1800	neg
ENSG00000176124	DLEU1	471	neg
ENSG00000176124	DLEU1	1528	pos
ENSG00000176124	DLEU1	1168	pos
ENSG00000176124	DLEU1	1683	pos
ENSG00000176124	DLEU1	1448	pos
ENSG00000176124	DLEU1	1496	pos
ENSG00000176124	DLEU1	757	pos
ENSG00000176124	DLEU1	544	pos
ENSG00000176124	DLEU1	725	pos
ENSG00000176124	DLEU1	1399	pos
ENSG00000176124	DLEU1	755	pos
ENSG00000176124	DLEU1	268	pos
ENSG00000176124	DLEU1	2030	pos
ENSG00000176124	DLEU1	1424	pos
ENSG00000176124	DLEU1	952	pos
ENSG00000176124	DLEU1	197	pos
ENSG00000176124	DLEU1	560	pos
ENSG00000176124	DLEU1	715	pos
ENSG00000176124	DLEU1	518	pos
ENSG00000176124	DLEU1	1325	pos
ENSG00000176124	DLEU1	1986	pos
ENSG00000176124	DLEU1	176	pos
ENSG00000176124	DLEU1	836	pos
ENSG00000176124	DLEU1	868	pos
ENSG00000176124	DLEU1	584	pos
ENSG00000176124	DLEU1	1674	pos
ENSG00000176124	DLEU1	795	pos
ENSG00000176124	DLEU1	958	pos
ENSG00000176124	DLEU1	1870	pos
ENSG00000176124	DLEU1	1036	pos
ENSG00000176124	DLEU1	935	pos
ENSG00000176124	DLEU1	1105	pos
ENSG00000176124	DLEU1	976	pos
ENSG00000176124	DLEU1	1503	pos
ENSG00000176124	DLEU1	367	pos
ENSG00000176124	DLEU1	1526	pos
ENSG00000176124	DLEU1	779	pos
ENSG00000176124	DLEU1	226	pos
ENSG00000176124	DLEU1	1580	pos
ENSG00000176124	DLEU1	1501	pos
ENSG00000176124	DLEU1	479	pos
ENSG00000176124	DLEU1	1765	pos
ENSG00000176124	DLEU1	223	pos
ENSG00000176124	DLEU1	1779	pos
ENSG00000176124	DLEU1	559	pos
ENSG00000176349	AC104129.1	492	neg
ENSG00000176349	AC104129.1	329	pos
ENSG00000176349	AC104129.1	1800	neg
ENSG00000176349	AC104129.1	1696	neg
ENSG00000176349	AC104129.1	595	pos
ENSG00000176349	AC104129.1	507	pos
ENSG00000176349	AC104129.1	2592	pos
ENSG00000176349	AC104129.1	403	pos
ENSG00000176349	AC104129.1	176	pos
ENSG00000176349	AC104129.1	474	pos
ENSG00000176349	AC104129.1	1496	pos
ENSG00000176349	AC104129.1	1498	pos
ENSG00000176349	AC104129.1	560	pos
ENSG00000176349	AC104129.1	268	pos
ENSG00000176349	AC104129.1	518	pos
ENSG00000176349	AC104129.1	1399	pos
ENSG00000176349	AC104129.1	505	pos
ENSG00000176349	AC104129.1	755	pos
ENSG00000176349	AC104129.1	354	pos
ENSG00000176349	AC104129.1	726	pos
ENSG00000176349	AC104129.1	471	neg
ENSG00000176912	TYMSOS	779	pos
ENSG00000176912	TYMSOS	280	pos
ENSG00000176912	TYMSOS	492	neg
ENSG00000176912	TYMSOS	1696	neg
ENSG00000176912	TYMSOS	2014	neg
ENSG00000176912	TYMSOS	726	pos
ENSG00000176912	TYMSOS	581	pos
ENSG00000176912	TYMSOS	1448	pos
ENSG00000176912	TYMSOS	1360	pos
ENSG00000176912	TYMSOS	1424	pos
ENSG00000176912	TYMSOS	1498	pos
ENSG00000176912	TYMSOS	1800	neg
ENSG00000176912	TYMSOS	505	pos
ENSG00000176912	TYMSOS	1496	pos
ENSG00000176912	TYMSOS	474	pos
ENSG00000176912	TYMSOS	176	pos
ENSG00000176912	TYMSOS	403	pos
ENSG00000176912	TYMSOS	755	pos
ENSG00000176912	TYMSOS	471	neg
ENSG00000176912	TYMSOS	507	pos
ENSG00000176912	TYMSOS	354	pos
ENSG00000176912	TYMSOS	518	pos
ENSG00000176912	TYMSOS	560	pos
ENSG00000176912	TYMSOS	268	pos
ENSG00000176912	TYMSOS	1399	pos
ENSG00000177112	MRVI1-AS1	1303	neg
ENSG00000177112	MRVI1-AS1	354	neg
ENSG00000177112	MRVI1-AS1	413	neg
ENSG00000177112	MRVI1-AS1	1498	neg
ENSG00000177112	MRVI1-AS1	197	neg
ENSG00000177112	MRVI1-AS1	640	neg
ENSG00000177112	MRVI1-AS1	2030	neg
ENSG00000177112	MRVI1-AS1	752	neg
ENSG00000177112	MRVI1-AS1	1496	neg
ENSG00000177112	MRVI1-AS1	1580	neg
ENSG00000177112	MRVI1-AS1	283	neg
ENSG00000177112	MRVI1-AS1	1039	neg
ENSG00000177112	MRVI1-AS1	1360	neg
ENSG00000177112	MRVI1-AS1	226	neg
ENSG00000177112	MRVI1-AS1	1105	neg
ENSG00000177112	MRVI1-AS1	1765	neg
ENSG00000177112	MRVI1-AS1	725	neg
ENSG00000177112	MRVI1-AS1	544	neg
ENSG00000177112	MRVI1-AS1	581	neg
ENSG00000177112	MRVI1-AS1	268	neg
ENSG00000177112	MRVI1-AS1	755	neg
ENSG00000177112	MRVI1-AS1	958	neg
ENSG00000177112	MRVI1-AS1	715	neg
ENSG00000177112	MRVI1-AS1	1399	neg
ENSG00000177112	MRVI1-AS1	868	neg
ENSG00000177112	MRVI1-AS1	479	neg
ENSG00000177112	MRVI1-AS1	560	neg
ENSG00000177112	MRVI1-AS1	584	neg
ENSG00000177112	MRVI1-AS1	1528	neg
ENSG00000177112	MRVI1-AS1	507	neg
ENSG00000177112	MRVI1-AS1	1503	neg
ENSG00000177112	MRVI1-AS1	1870	neg
ENSG00000177112	MRVI1-AS1	1674	neg
ENSG00000177112	MRVI1-AS1	952	neg
ENSG00000177112	MRVI1-AS1	518	neg
ENSG00000177112	MRVI1-AS1	1448	neg
ENSG00000177112	MRVI1-AS1	836	neg
ENSG00000177112	MRVI1-AS1	1501	neg
ENSG00000177112	MRVI1-AS1	1036	neg
ENSG00000177112	MRVI1-AS1	1526	neg
ENSG00000177112	MRVI1-AS1	367	neg
ENSG00000177112	MRVI1-AS1	976	neg
ENSG00000177112	MRVI1-AS1	779	neg
ENSG00000177112	MRVI1-AS1	795	neg
ENSG00000177112	MRVI1-AS1	176	neg
ENSG00000177112	MRVI1-AS1	223	neg
ENSG00000177335	C8orf31	1168	neg
ENSG00000177335	C8orf31	367	neg
ENSG00000177335	C8orf31	280	neg
ENSG00000177335	C8orf31	1498	neg
ENSG00000177335	C8orf31	505	neg
ENSG00000177335	C8orf31	1619	neg
ENSG00000177335	C8orf31	507	neg
ENSG00000177335	C8orf31	1503	neg
ENSG00000177335	C8orf31	544	neg
ENSG00000177335	C8orf31	1528	neg
ENSG00000177335	C8orf31	560	neg
ENSG00000177335	C8orf31	268	neg
ENSG00000177335	C8orf31	518	neg
ENSG00000177335	C8orf31	1496	neg
ENSG00000177335	C8orf31	403	neg
ENSG00000177335	C8orf31	1399	neg
ENSG00000177335	C8orf31	1501	neg
ENSG00000177335	C8orf31	779	neg
ENSG00000177335	C8orf31	726	neg
ENSG00000177335	C8orf31	1986	neg
ENSG00000177335	C8orf31	1105	neg
ENSG00000177335	C8orf31	223	neg
ENSG00000177335	C8orf31	755	neg
ENSG00000177335	C8orf31	1526	neg
ENSG00000177335	C8orf31	479	neg
ENSG00000177335	C8orf31	795	neg
ENSG00000177335	C8orf31	976	neg
ENSG00000177335	C8orf31	1765	neg
ENSG00000177335	C8orf31	935	neg
ENSG00000177335	C8orf31	226	neg
ENSG00000177335	C8orf31	1580	neg
ENSG00000177335	C8orf31	1448	neg
ENSG00000177335	C8orf31	471	pos
ENSG00000177335	C8orf31	1779	neg
ENSG00000177335	C8orf31	559	neg
ENSG00000177340	FLJ13224	1696	neg
ENSG00000177340	FLJ13224	958	pos
ENSG00000177340	FLJ13224	595	pos
ENSG00000177340	FLJ13224	492	neg
ENSG00000177340	FLJ13224	280	pos
ENSG00000177340	FLJ13224	1800	neg
ENSG00000177340	FLJ13224	1498	pos
ENSG00000177340	FLJ13224	1526	pos
ENSG00000177340	FLJ13224	354	pos
ENSG00000177340	FLJ13224	1639	pos
ENSG00000177340	FLJ13224	176	pos
ENSG00000177340	FLJ13224	976	pos
ENSG00000177340	FLJ13224	474	pos
ENSG00000177340	FLJ13224	367	pos
ENSG00000177340	FLJ13224	795	pos
ENSG00000177340	FLJ13224	726	pos
ENSG00000177340	FLJ13224	505	pos
ENSG00000177340	FLJ13224	471	neg
ENSG00000178440	LINC00843	329	pos
ENSG00000178440	LINC00843	1696	neg
ENSG00000178440	LINC00843	403	pos
ENSG00000178440	LINC00843	1639	pos
ENSG00000178440	LINC00843	367	pos
ENSG00000178440	LINC00843	1800	neg
ENSG00000178440	LINC00843	2014	neg
ENSG00000178440	LINC00843	176	pos
ENSG00000178440	LINC00843	474	pos
ENSG00000178440	LINC00843	1498	pos
ENSG00000178440	LINC00843	1569	pos
ENSG00000178440	LINC00843	507	pos
ENSG00000178440	LINC00843	518	pos
ENSG00000178440	LINC00843	755	pos
ENSG00000178440	LINC00843	1448	pos
ENSG00000178440	LINC00843	2592	pos
ENSG00000178440	LINC00843	560	pos
ENSG00000178440	LINC00843	726	pos
ENSG00000178440	LINC00843	268	pos
ENSG00000178440	LINC00843	1399	pos
ENSG00000178440	LINC00843	505	pos
ENSG00000178440	LINC00843	354	pos
ENSG00000178440	LINC00843	471	neg
ENSG00000180846	CSNK1G2-AS1	507	pos
ENSG00000180846	CSNK1G2-AS1	280	pos
ENSG00000180846	CSNK1G2-AS1	958	pos
ENSG00000180846	CSNK1G2-AS1	1619	pos
ENSG00000180846	CSNK1G2-AS1	595	pos
ENSG00000180846	CSNK1G2-AS1	329	pos
ENSG00000180846	CSNK1G2-AS1	1526	pos
ENSG00000180846	CSNK1G2-AS1	403	pos
ENSG00000180846	CSNK1G2-AS1	1639	pos
ENSG00000180846	CSNK1G2-AS1	367	pos
ENSG00000180846	CSNK1G2-AS1	518	pos
ENSG00000180846	CSNK1G2-AS1	2592	pos
ENSG00000180846	CSNK1G2-AS1	1448	pos
ENSG00000180846	CSNK1G2-AS1	474	pos
ENSG00000180846	CSNK1G2-AS1	560	pos
ENSG00000180846	CSNK1G2-AS1	1498	pos
ENSG00000180846	CSNK1G2-AS1	268	pos
ENSG00000180846	CSNK1G2-AS1	1399	pos
ENSG00000180846	CSNK1G2-AS1	505	pos
ENSG00000180846	CSNK1G2-AS1	726	pos
ENSG00000180846	CSNK1G2-AS1	354	pos
ENSG00000180846	CSNK1G2-AS1	471	neg
ENSG00000182165	TP53TG1	507	neg
ENSG00000182165	TP53TG1	226	neg
ENSG00000182165	TP53TG1	1765	neg
ENSG00000182165	TP53TG1	1986	neg
ENSG00000182165	TP53TG1	1168	neg
ENSG00000182165	TP53TG1	2030	neg
ENSG00000182165	TP53TG1	479	neg
ENSG00000182165	TP53TG1	868	neg
ENSG00000182165	TP53TG1	779	neg
ENSG00000182165	TP53TG1	1503	neg
ENSG00000182165	TP53TG1	726	neg
ENSG00000182165	TP53TG1	1448	neg
ENSG00000182165	TP53TG1	1501	neg
ENSG00000182165	TP53TG1	584	neg
ENSG00000182165	TP53TG1	715	neg
ENSG00000182165	TP53TG1	1674	neg
ENSG00000182165	TP53TG1	952	neg
ENSG00000182165	TP53TG1	1870	neg
ENSG00000182165	TP53TG1	367	neg
ENSG00000182165	TP53TG1	1528	neg
ENSG00000182165	TP53TG1	958	neg
ENSG00000182165	TP53TG1	223	neg
ENSG00000182165	TP53TG1	836	neg
ENSG00000182165	TP53TG1	1036	neg
ENSG00000182165	TP53TG1	176	neg
ENSG00000182165	TP53TG1	976	neg
ENSG00000182165	TP53TG1	795	neg
ENSG00000182165	TP53TG1	1526	neg
ENSG00000183308	AC005037.1	1528	pos
ENSG00000183308	AC005037.1	559	pos
ENSG00000184809	B3GALT5-AS1	1201	neg
ENSG00000184809	B3GALT5-AS1	1399	neg
ENSG00000184809	B3GALT5-AS1	1424	neg
ENSG00000184809	B3GALT5-AS1	1496	neg
ENSG00000184809	B3GALT5-AS1	560	neg
ENSG00000184809	B3GALT5-AS1	280	neg
ENSG00000184809	B3GALT5-AS1	836	neg
ENSG00000184809	B3GALT5-AS1	1036	neg
ENSG00000184809	B3GALT5-AS1	268	neg
ENSG00000184809	B3GALT5-AS1	518	neg
ENSG00000184809	B3GALT5-AS1	725	neg
ENSG00000184809	B3GALT5-AS1	595	neg
ENSG00000184809	B3GALT5-AS1	2030	neg
ENSG00000184809	B3GALT5-AS1	715	neg
ENSG00000184809	B3GALT5-AS1	726	neg
ENSG00000184809	B3GALT5-AS1	1683	neg
ENSG00000184809	B3GALT5-AS1	868	neg
ENSG00000184809	B3GALT5-AS1	1303	neg
ENSG00000184809	B3GALT5-AS1	1619	neg
ENSG00000184809	B3GALT5-AS1	958	neg
ENSG00000184809	B3GALT5-AS1	1500	neg
ENSG00000184809	B3GALT5-AS1	952	neg
ENSG00000184809	B3GALT5-AS1	779	neg
ENSG00000184809	B3GALT5-AS1	1674	neg
ENSG00000184809	B3GALT5-AS1	1870	neg
ENSG00000184809	B3GALT5-AS1	1448	neg
ENSG00000184809	B3GALT5-AS1	197	neg
ENSG00000184809	B3GALT5-AS1	584	neg
ENSG00000184809	B3GALT5-AS1	544	neg
ENSG00000184809	B3GALT5-AS1	1168	neg
ENSG00000184809	B3GALT5-AS1	1503	neg
ENSG00000184809	B3GALT5-AS1	1501	neg
ENSG00000184809	B3GALT5-AS1	1105	neg
ENSG00000184809	B3GALT5-AS1	755	neg
ENSG00000184809	B3GALT5-AS1	223	neg
ENSG00000184809	B3GALT5-AS1	226	neg
ENSG00000184809	B3GALT5-AS1	479	neg
ENSG00000184809	B3GALT5-AS1	471	pos
ENSG00000184809	B3GALT5-AS1	1528	neg
ENSG00000184809	B3GALT5-AS1	1765	neg
ENSG00000184809	B3GALT5-AS1	935	neg
ENSG00000184809	B3GALT5-AS1	367	neg
ENSG00000184809	B3GALT5-AS1	1986	neg
ENSG00000184809	B3GALT5-AS1	976	neg
ENSG00000184809	B3GALT5-AS1	795	neg
ENSG00000184809	B3GALT5-AS1	1526	neg
ENSG00000184809	B3GALT5-AS1	1580	neg
ENSG00000184809	B3GALT5-AS1	1779	neg
ENSG00000184809	B3GALT5-AS1	559	neg
ENSG00000185168	LINC00482	1325	neg
ENSG00000185168	LINC00482	367	neg
ENSG00000185168	LINC00482	725	neg
ENSG00000185168	LINC00482	1498	neg
ENSG00000185168	LINC00482	1039	neg
ENSG00000185168	LINC00482	280	neg
ENSG00000185168	LINC00482	1013	neg
ENSG00000185168	LINC00482	1528	neg
ENSG00000185168	LINC00482	595	neg
ENSG00000185168	LINC00482	1619	neg
ENSG00000185168	LINC00482	1496	neg
ENSG00000185168	LINC00482	413	neg
ENSG00000185168	LINC00482	1303	neg
ENSG00000185168	LINC00482	283	neg
ENSG00000185168	LINC00482	1423	neg
ENSG00000185168	LINC00482	403	neg
ENSG00000185168	LINC00482	1168	neg
ENSG00000185168	LINC00482	544	neg
ENSG00000185168	LINC00482	795	neg
ENSG00000185168	LINC00482	197	neg
ENSG00000185168	LINC00482	581	neg
ENSG00000185168	LINC00482	868	neg
ENSG00000185168	LINC00482	507	neg
ENSG00000185168	LINC00482	976	neg
ENSG00000185168	LINC00482	726	neg
ENSG00000185168	LINC00482	952	neg
ENSG00000185168	LINC00482	935	neg
ENSG00000185168	LINC00482	2592	neg
ENSG00000185168	LINC00482	474	neg
ENSG00000185168	LINC00482	1448	neg
ENSG00000185168	LINC00482	715	neg
ENSG00000185168	LINC00482	1639	neg
ENSG00000185168	LINC00482	1360	neg
ENSG00000185168	LINC00482	1526	neg
ENSG00000185168	LINC00482	2030	neg
ENSG00000185168	LINC00482	354	neg
ENSG00000185168	LINC00482	505	neg
ENSG00000185168	LINC00482	1105	neg
ENSG00000185168	LINC00482	755	neg
ENSG00000185168	LINC00482	1674	neg
ENSG00000185168	LINC00482	779	neg
ENSG00000185168	LINC00482	1986	neg
ENSG00000185168	LINC00482	836	neg
ENSG00000185168	LINC00482	1870	neg
ENSG00000185168	LINC00482	1036	neg
ENSG00000185168	LINC00482	560	neg
ENSG00000185168	LINC00482	1503	neg
ENSG00000185168	LINC00482	176	neg
ENSG00000185168	LINC00482	226	neg
ENSG00000185168	LINC00482	1765	neg
ENSG00000185168	LINC00482	1580	neg
ENSG00000185168	LINC00482	268	neg
ENSG00000185168	LINC00482	1501	neg
ENSG00000185168	LINC00482	1399	neg
ENSG00000185168	LINC00482	479	neg
ENSG00000185168	LINC00482	518	neg
ENSG00000185168	LINC00482	1779	neg
ENSG00000185168	LINC00482	559	neg
ENSG00000185168	LINC00482	223	neg
ENSG00000185186	LINC00313	715	neg
ENSG00000185186	LINC00313	958	neg
ENSG00000185186	LINC00313	1168	neg
ENSG00000185186	LINC00313	1569	neg
ENSG00000185186	LINC00313	1303	neg
ENSG00000185186	LINC00313	1013	neg
ENSG00000185186	LINC00313	2014	pos
ENSG00000185186	LINC00313	595	neg
ENSG00000185186	LINC00313	1619	neg
ENSG00000185186	LINC00313	1683	neg
ENSG00000185186	LINC00313	1201	neg
ENSG00000185186	LINC00313	280	neg
ENSG00000185186	LINC00313	952	neg
ENSG00000185186	LINC00313	1696	pos
ENSG00000185186	LINC00313	544	neg
ENSG00000185186	LINC00313	1500	neg
ENSG00000185186	LINC00313	836	neg
ENSG00000185186	LINC00313	492	pos
ENSG00000185186	LINC00313	1639	neg
ENSG00000185186	LINC00313	474	neg
ENSG00000185186	LINC00313	176	neg
ENSG00000185186	LINC00313	868	neg
ENSG00000185186	LINC00313	1424	neg
ENSG00000185186	LINC00313	354	neg
ENSG00000185186	LINC00313	1036	neg
ENSG00000185186	LINC00313	1674	neg
ENSG00000185186	LINC00313	1800	pos
ENSG00000185186	LINC00313	1496	neg
ENSG00000185186	LINC00313	1448	neg
ENSG00000185186	LINC00313	507	neg
ENSG00000185186	LINC00313	1870	neg
ENSG00000185186	LINC00313	1528	neg
ENSG00000185186	LINC00313	1105	neg
ENSG00000185186	LINC00313	935	neg
ENSG00000185186	LINC00313	1498	neg
ENSG00000185186	LINC00313	505	neg
ENSG00000185186	LINC00313	403	neg
ENSG00000185186	LINC00313	584	neg
ENSG00000185186	LINC00313	1526	neg
ENSG00000185186	LINC00313	1503	neg
ENSG00000185186	LINC00313	755	neg
ENSG00000185186	LINC00313	1986	neg
ENSG00000185186	LINC00313	976	neg
ENSG00000185186	LINC00313	726	neg
ENSG00000185186	LINC00313	779	neg
ENSG00000185186	LINC00313	1501	neg
ENSG00000185186	LINC00313	518	neg
ENSG00000185186	LINC00313	268	neg
ENSG00000185186	LINC00313	197	neg
ENSG00000185186	LINC00313	795	neg
ENSG00000185186	LINC00313	560	neg
ENSG00000185186	LINC00313	1399	neg
ENSG00000185186	LINC00313	471	pos
ENSG00000185186	LINC00313	1765	neg
ENSG00000185186	LINC00313	479	neg
ENSG00000185186	LINC00313	367	neg
ENSG00000185186	LINC00313	1580	neg
ENSG00000185186	LINC00313	226	neg
ENSG00000185186	LINC00313	223	neg
ENSG00000185186	LINC00313	1779	neg
ENSG00000185186	LINC00313	559	neg
ENSG00000186056	MATN1-AS1	226	neg
ENSG00000186056	MATN1-AS1	1580	neg
ENSG00000186056	MATN1-AS1	725	neg
ENSG00000186056	MATN1-AS1	1039	neg
ENSG00000186056	MATN1-AS1	1765	neg
ENSG00000186056	MATN1-AS1	297	neg
ENSG00000186056	MATN1-AS1	1423	neg
ENSG00000186056	MATN1-AS1	413	neg
ENSG00000186056	MATN1-AS1	1496	neg
ENSG00000186056	MATN1-AS1	1325	neg
ENSG00000186056	MATN1-AS1	726	neg
ENSG00000186056	MATN1-AS1	976	neg
ENSG00000186056	MATN1-AS1	958	neg
ENSG00000186056	MATN1-AS1	1105	neg
ENSG00000186056	MATN1-AS1	1569	neg
ENSG00000186056	MATN1-AS1	1013	neg
ENSG00000186056	MATN1-AS1	403	neg
ENSG00000186056	MATN1-AS1	1639	neg
ENSG00000186056	MATN1-AS1	197	neg
ENSG00000186056	MATN1-AS1	474	neg
ENSG00000186056	MATN1-AS1	479	neg
ENSG00000186056	MATN1-AS1	2030	neg
ENSG00000186056	MATN1-AS1	283	neg
ENSG00000186056	MATN1-AS1	1498	neg
ENSG00000186056	MATN1-AS1	868	neg
ENSG00000186056	MATN1-AS1	1168	neg
ENSG00000186056	MATN1-AS1	755	neg
ENSG00000186056	MATN1-AS1	1360	neg
ENSG00000186056	MATN1-AS1	505	neg
ENSG00000186056	MATN1-AS1	1448	neg
ENSG00000186056	MATN1-AS1	354	neg
ENSG00000186056	MATN1-AS1	507	neg
ENSG00000186056	MATN1-AS1	715	neg
ENSG00000186056	MATN1-AS1	1674	neg
ENSG00000186056	MATN1-AS1	1501	neg
ENSG00000186056	MATN1-AS1	544	neg
ENSG00000186056	MATN1-AS1	1503	neg
ENSG00000186056	MATN1-AS1	952	neg
ENSG00000186056	MATN1-AS1	1870	neg
ENSG00000186056	MATN1-AS1	176	neg
ENSG00000186056	MATN1-AS1	1036	neg
ENSG00000186056	MATN1-AS1	581	neg
ENSG00000186056	MATN1-AS1	268	neg
ENSG00000186056	MATN1-AS1	836	neg
ENSG00000186056	MATN1-AS1	560	neg
ENSG00000186056	MATN1-AS1	518	neg
ENSG00000186056	MATN1-AS1	1399	neg
ENSG00000186056	MATN1-AS1	779	neg
ENSG00000186056	MATN1-AS1	223	neg
ENSG00000186615	KTN1-AS1	1683	pos
ENSG00000186615	KTN1-AS1	1779	pos
ENSG00000186615	KTN1-AS1	367	pos
ENSG00000186615	KTN1-AS1	584	pos
ENSG00000186615	KTN1-AS1	976	pos
ENSG00000186615	KTN1-AS1	795	pos
ENSG00000186615	KTN1-AS1	559	pos
ENSG00000187185	AC092118.1	1013	neg
ENSG00000187185	AC092118.1	958	neg
ENSG00000187185	AC092118.1	176	neg
ENSG00000187185	AC092118.1	595	neg
ENSG00000187185	AC092118.1	1639	neg
ENSG00000187185	AC092118.1	2030	neg
ENSG00000187185	AC092118.1	836	neg
ENSG00000187185	AC092118.1	1036	neg
ENSG00000187185	AC092118.1	1674	neg
ENSG00000187185	AC092118.1	1870	neg
ENSG00000187185	AC092118.1	1496	neg
ENSG00000187185	AC092118.1	1168	neg
ENSG00000187185	AC092118.1	197	neg
ENSG00000187185	AC092118.1	1498	neg
ENSG00000187185	AC092118.1	1569	neg
ENSG00000187185	AC092118.1	779	neg
ENSG00000187185	AC092118.1	1503	neg
ENSG00000187185	AC092118.1	474	neg
ENSG00000187185	AC092118.1	1105	neg
ENSG00000187185	AC092118.1	354	neg
ENSG00000187185	AC092118.1	507	neg
ENSG00000187185	AC092118.1	1501	neg
ENSG00000187185	AC092118.1	367	neg
ENSG00000187185	AC092118.1	471	pos
ENSG00000187185	AC092118.1	403	neg
ENSG00000187185	AC092118.1	976	neg
ENSG00000187185	AC092118.1	935	neg
ENSG00000187185	AC092118.1	1448	neg
ENSG00000187185	AC092118.1	795	neg
ENSG00000187185	AC092118.1	755	neg
ENSG00000187185	AC092118.1	1528	neg
ENSG00000187185	AC092118.1	1526	neg
ENSG00000187185	AC092118.1	1765	neg
ENSG00000187185	AC092118.1	479	neg
ENSG00000187185	AC092118.1	1986	neg
ENSG00000187185	AC092118.1	505	neg
ENSG00000187185	AC092118.1	726	neg
ENSG00000187185	AC092118.1	226	neg
ENSG00000187185	AC092118.1	223	neg
ENSG00000187185	AC092118.1	1580	neg
ENSG00000187185	AC092118.1	268	neg
ENSG00000187185	AC092118.1	1399	neg
ENSG00000187185	AC092118.1	518	neg
ENSG00000187185	AC092118.1	560	neg
ENSG00000187185	AC092118.1	1779	neg
ENSG00000187185	AC092118.1	559	neg
ENSG00000187904	AC097382.1	1800	neg
ENSG00000187904	AC097382.1	1201	pos
ENSG00000187904	AC097382.1	492	neg
ENSG00000187904	AC097382.1	1696	neg
ENSG00000187904	AC097382.1	2014	neg
ENSG00000187904	AC097382.1	474	pos
ENSG00000187904	AC097382.1	268	pos
ENSG00000187904	AC097382.1	505	pos
ENSG00000187904	AC097382.1	354	pos
ENSG00000187904	AC097382.1	1399	pos
ENSG00000187904	AC097382.1	726	pos
ENSG00000187904	AC097382.1	471	neg
ENSG00000188511	C22orf34	280	pos
ENSG00000188511	C22orf34	584	pos
ENSG00000188511	C22orf34	1569	pos
ENSG00000188511	C22orf34	1503	pos
ENSG00000188511	C22orf34	595	pos
ENSG00000188511	C22orf34	1619	pos
ENSG00000188511	C22orf34	1105	pos
ENSG00000188511	C22orf34	1501	pos
ENSG00000188511	C22orf34	779	pos
ENSG00000188511	C22orf34	176	pos
ENSG00000188511	C22orf34	197	pos
ENSG00000188511	C22orf34	1496	pos
ENSG00000188511	C22orf34	1639	pos
ENSG00000188511	C22orf34	474	pos
ENSG00000188511	C22orf34	1448	pos
ENSG00000188511	C22orf34	403	pos
ENSG00000188511	C22orf34	1800	neg
ENSG00000188511	C22orf34	935	pos
ENSG00000188511	C22orf34	1765	pos
ENSG00000188511	C22orf34	1528	pos
ENSG00000188511	C22orf34	2014	neg
ENSG00000188511	C22orf34	479	pos
ENSG00000188511	C22orf34	1498	pos
ENSG00000188511	C22orf34	507	pos
ENSG00000188511	C22orf34	354	pos
ENSG00000188511	C22orf34	226	pos
ENSG00000188511	C22orf34	1580	pos
ENSG00000188511	C22orf34	223	pos
ENSG00000188511	C22orf34	1986	pos
ENSG00000188511	C22orf34	505	pos
ENSG00000188511	C22orf34	976	pos
ENSG00000188511	C22orf34	268	pos
ENSG00000188511	C22orf34	367	pos
ENSG00000188511	C22orf34	1526	pos
ENSG00000188511	C22orf34	1399	pos
ENSG00000188511	C22orf34	560	pos
ENSG00000188511	C22orf34	755	pos
ENSG00000188511	C22orf34	795	pos
ENSG00000188511	C22orf34	518	pos
ENSG00000188511	C22orf34	726	pos
ENSG00000188511	C22orf34	471	neg
ENSG00000188511	C22orf34	1779	pos
ENSG00000188511	C22orf34	559	pos
ENSG00000188660	LINC00319	1201	neg
ENSG00000188660	LINC00319	1569	neg
ENSG00000188660	LINC00319	2014	pos
ENSG00000188660	LINC00319	403	neg
ENSG00000188660	LINC00319	280	neg
ENSG00000188660	LINC00319	958	neg
ENSG00000188660	LINC00319	544	neg
ENSG00000188660	LINC00319	595	neg
ENSG00000188660	LINC00319	1639	neg
ENSG00000188660	LINC00319	1303	neg
ENSG00000188660	LINC00319	507	neg
ENSG00000188660	LINC00319	1498	neg
ENSG00000188660	LINC00319	1168	neg
ENSG00000188660	LINC00319	715	neg
ENSG00000188660	LINC00319	1619	neg
ENSG00000188660	LINC00319	725	neg
ENSG00000188660	LINC00319	474	neg
ENSG00000188660	LINC00319	354	neg
ENSG00000188660	LINC00319	1496	neg
ENSG00000188660	LINC00319	2030	neg
ENSG00000188660	LINC00319	757	neg
ENSG00000188660	LINC00319	726	neg
ENSG00000188660	LINC00319	868	neg
ENSG00000188660	LINC00319	952	neg
ENSG00000188660	LINC00319	1800	pos
ENSG00000188660	LINC00319	560	neg
ENSG00000188660	LINC00319	268	neg
ENSG00000188660	LINC00319	176	neg
ENSG00000188660	LINC00319	505	neg
ENSG00000188660	LINC00319	836	neg
ENSG00000188660	LINC00319	755	neg
ENSG00000188660	LINC00319	518	neg
ENSG00000188660	LINC00319	1036	neg
ENSG00000188660	LINC00319	1674	neg
ENSG00000188660	LINC00319	1448	neg
ENSG00000188660	LINC00319	1399	neg
ENSG00000188660	LINC00319	471	pos
ENSG00000188660	LINC00319	1325	neg
ENSG00000188660	LINC00319	1870	neg
ENSG00000188660	LINC00319	584	neg
ENSG00000188660	LINC00319	976	neg
ENSG00000188660	LINC00319	935	neg
ENSG00000188660	LINC00319	1526	neg
ENSG00000188660	LINC00319	795	neg
ENSG00000188660	LINC00319	1503	neg
ENSG00000188660	LINC00319	1528	neg
ENSG00000188660	LINC00319	197	neg
ENSG00000188660	LINC00319	1105	neg
ENSG00000188660	LINC00319	367	neg
ENSG00000188660	LINC00319	779	neg
ENSG00000188660	LINC00319	1986	neg
ENSG00000188660	LINC00319	1501	neg
ENSG00000188660	LINC00319	226	neg
ENSG00000188660	LINC00319	1765	neg
ENSG00000188660	LINC00319	479	neg
ENSG00000188660	LINC00319	1580	neg
ENSG00000188660	LINC00319	223	neg
ENSG00000188660	LINC00319	1779	neg
ENSG00000188660	LINC00319	559	neg
ENSG00000189238	LINC00943	544	neg
ENSG00000189238	LINC00943	1168	neg
ENSG00000189238	LINC00943	1501	neg
ENSG00000189238	LINC00943	479	neg
ENSG00000189238	LINC00943	952	neg
ENSG00000189238	LINC00943	1201	neg
ENSG00000189238	LINC00943	1569	neg
ENSG00000189238	LINC00943	1870	neg
ENSG00000189238	LINC00943	836	neg
ENSG00000189238	LINC00943	1036	neg
ENSG00000189238	LINC00943	280	neg
ENSG00000189238	LINC00943	1800	pos
ENSG00000189238	LINC00943	581	neg
ENSG00000189238	LINC00943	1503	neg
ENSG00000189238	LINC00943	1639	neg
ENSG00000189238	LINC00943	1013	neg
ENSG00000189238	LINC00943	223	neg
ENSG00000189238	LINC00943	976	neg
ENSG00000189238	LINC00943	1448	neg
ENSG00000189238	LINC00943	1496	neg
ENSG00000189238	LINC00943	403	neg
ENSG00000189238	LINC00943	726	neg
ENSG00000189238	LINC00943	779	neg
ENSG00000189238	LINC00943	471	pos
ENSG00000189238	LINC00943	507	neg
ENSG00000189238	LINC00943	474	neg
ENSG00000189238	LINC00943	176	neg
ENSG00000189238	LINC00943	1498	neg
ENSG00000189238	LINC00943	505	neg
ENSG00000189238	LINC00943	755	neg
ENSG00000189238	LINC00943	560	neg
ENSG00000189238	LINC00943	518	neg
ENSG00000189238	LINC00943	268	neg
ENSG00000189238	LINC00943	1399	neg
ENSG00000196756	SNHG17	492	neg
ENSG00000196756	SNHG17	1800	neg
ENSG00000196756	SNHG17	1500	pos
ENSG00000196756	SNHG17	757	pos
ENSG00000196756	SNHG17	1424	pos
ENSG00000196756	SNHG17	1683	pos
ENSG00000196756	SNHG17	1303	pos
ENSG00000196756	SNHG17	1423	pos
ENSG00000196756	SNHG17	544	pos
ENSG00000196756	SNHG17	505	pos
ENSG00000196756	SNHG17	725	pos
ENSG00000196756	SNHG17	1496	pos
ENSG00000196756	SNHG17	715	pos
ENSG00000196756	SNHG17	726	pos
ENSG00000196756	SNHG17	1399	pos
ENSG00000196756	SNHG17	1325	pos
ENSG00000196756	SNHG17	755	pos
ENSG00000196756	SNHG17	868	pos
ENSG00000196756	SNHG17	471	neg
ENSG00000196756	SNHG17	268	pos
ENSG00000196756	SNHG17	1448	pos
ENSG00000196756	SNHG17	584	pos
ENSG00000196756	SNHG17	1168	pos
ENSG00000196756	SNHG17	197	pos
ENSG00000196756	SNHG17	952	pos
ENSG00000196756	SNHG17	518	pos
ENSG00000196756	SNHG17	2030	pos
ENSG00000196756	SNHG17	1105	pos
ENSG00000196756	SNHG17	560	pos
ENSG00000196756	SNHG17	1674	pos
ENSG00000196756	SNHG17	836	pos
ENSG00000196756	SNHG17	176	pos
ENSG00000196756	SNHG17	1870	pos
ENSG00000196756	SNHG17	1501	pos
ENSG00000196756	SNHG17	779	pos
ENSG00000196756	SNHG17	367	pos
ENSG00000196756	SNHG17	1503	pos
ENSG00000196756	SNHG17	1036	pos
ENSG00000196756	SNHG17	1528	pos
ENSG00000196756	SNHG17	1986	pos
ENSG00000196756	SNHG17	479	pos
ENSG00000196756	SNHG17	935	pos
ENSG00000196756	SNHG17	795	pos
ENSG00000196756	SNHG17	958	pos
ENSG00000196756	SNHG17	1765	pos
ENSG00000196756	SNHG17	226	pos
ENSG00000196756	SNHG17	976	pos
ENSG00000196756	SNHG17	1526	pos
ENSG00000196756	SNHG17	1580	pos
ENSG00000196756	SNHG17	223	pos
ENSG00000196756	SNHG17	1779	pos
ENSG00000196756	SNHG17	559	pos
ENSG00000196951	SCOC-AS1	1503	pos
ENSG00000196951	SCOC-AS1	2592	pos
ENSG00000196951	SCOC-AS1	1448	pos
ENSG00000196951	SCOC-AS1	403	pos
ENSG00000196951	SCOC-AS1	1168	pos
ENSG00000196951	SCOC-AS1	1800	neg
ENSG00000196951	SCOC-AS1	1639	pos
ENSG00000196951	SCOC-AS1	176	pos
ENSG00000196951	SCOC-AS1	726	pos
ENSG00000196951	SCOC-AS1	1496	pos
ENSG00000196951	SCOC-AS1	223	pos
ENSG00000196951	SCOC-AS1	1498	pos
ENSG00000196951	SCOC-AS1	560	pos
ENSG00000196951	SCOC-AS1	507	pos
ENSG00000196951	SCOC-AS1	518	pos
ENSG00000196951	SCOC-AS1	474	pos
ENSG00000196951	SCOC-AS1	505	pos
ENSG00000196951	SCOC-AS1	354	pos
ENSG00000196951	SCOC-AS1	268	pos
ENSG00000196951	SCOC-AS1	755	pos
ENSG00000196951	SCOC-AS1	1399	pos
ENSG00000196951	SCOC-AS1	471	neg
ENSG00000197182	MIRLET7BHG	1569	neg
ENSG00000197182	MIRLET7BHG	1201	neg
ENSG00000197182	MIRLET7BHG	2014	pos
ENSG00000197182	MIRLET7BHG	474	neg
ENSG00000197182	MIRLET7BHG	1039	neg
ENSG00000197182	MIRLET7BHG	507	neg
ENSG00000197182	MIRLET7BHG	1639	neg
ENSG00000197182	MIRLET7BHG	958	neg
ENSG00000197182	MIRLET7BHG	2030	neg
ENSG00000197182	MIRLET7BHG	1498	neg
ENSG00000197182	MIRLET7BHG	1424	neg
ENSG00000197182	MIRLET7BHG	403	neg
ENSG00000197182	MIRLET7BHG	176	neg
ENSG00000197182	MIRLET7BHG	1619	neg
ENSG00000197182	MIRLET7BHG	595	neg
ENSG00000197182	MIRLET7BHG	725	neg
ENSG00000197182	MIRLET7BHG	1303	neg
ENSG00000197182	MIRLET7BHG	715	neg
ENSG00000197182	MIRLET7BHG	726	neg
ENSG00000197182	MIRLET7BHG	505	neg
ENSG00000197182	MIRLET7BHG	1496	neg
ENSG00000197182	MIRLET7BHG	584	neg
ENSG00000197182	MIRLET7BHG	1526	neg
ENSG00000197182	MIRLET7BHG	1168	neg
ENSG00000197182	MIRLET7BHG	544	neg
ENSG00000197182	MIRLET7BHG	1528	neg
ENSG00000197182	MIRLET7BHG	755	neg
ENSG00000197182	MIRLET7BHG	197	neg
ENSG00000197182	MIRLET7BHG	1448	neg
ENSG00000197182	MIRLET7BHG	367	neg
ENSG00000197182	MIRLET7BHG	518	neg
ENSG00000197182	MIRLET7BHG	952	neg
ENSG00000197182	MIRLET7BHG	560	neg
ENSG00000197182	MIRLET7BHG	868	neg
ENSG00000197182	MIRLET7BHG	976	neg
ENSG00000197182	MIRLET7BHG	836	neg
ENSG00000197182	MIRLET7BHG	1105	neg
ENSG00000197182	MIRLET7BHG	935	neg
ENSG00000197182	MIRLET7BHG	795	neg
ENSG00000197182	MIRLET7BHG	268	neg
ENSG00000197182	MIRLET7BHG	1399	neg
ENSG00000197182	MIRLET7BHG	779	neg
ENSG00000197182	MIRLET7BHG	1503	neg
ENSG00000197182	MIRLET7BHG	1036	neg
ENSG00000197182	MIRLET7BHG	1870	neg
ENSG00000197182	MIRLET7BHG	1674	neg
ENSG00000197182	MIRLET7BHG	1986	neg
ENSG00000197182	MIRLET7BHG	1501	neg
ENSG00000197182	MIRLET7BHG	471	pos
ENSG00000197182	MIRLET7BHG	479	neg
ENSG00000197182	MIRLET7BHG	226	neg
ENSG00000197182	MIRLET7BHG	1765	neg
ENSG00000197182	MIRLET7BHG	1580	neg
ENSG00000197182	MIRLET7BHG	223	neg
ENSG00000197182	MIRLET7BHG	1779	neg
ENSG00000197182	MIRLET7BHG	559	neg
ENSG00000198221	AFDN-AS1	354	neg
ENSG00000198221	AFDN-AS1	1639	neg
ENSG00000198221	AFDN-AS1	1325	neg
ENSG00000198221	AFDN-AS1	283	neg
ENSG00000198221	AFDN-AS1	726	neg
ENSG00000198221	AFDN-AS1	505	neg
ENSG00000198221	AFDN-AS1	176	neg
ENSG00000198221	AFDN-AS1	1303	neg
ENSG00000198221	AFDN-AS1	403	neg
ENSG00000198221	AFDN-AS1	958	neg
ENSG00000198221	AFDN-AS1	1496	neg
ENSG00000198221	AFDN-AS1	1399	neg
ENSG00000198221	AFDN-AS1	507	neg
ENSG00000198221	AFDN-AS1	1039	neg
ENSG00000198221	AFDN-AS1	1168	neg
ENSG00000198221	AFDN-AS1	544	neg
ENSG00000198221	AFDN-AS1	268	neg
ENSG00000198221	AFDN-AS1	1448	neg
ENSG00000198221	AFDN-AS1	560	neg
ENSG00000198221	AFDN-AS1	2030	neg
ENSG00000198221	AFDN-AS1	518	neg
ENSG00000198221	AFDN-AS1	725	neg
ENSG00000198221	AFDN-AS1	795	neg
ENSG00000198221	AFDN-AS1	755	neg
ENSG00000198221	AFDN-AS1	935	neg
ENSG00000198221	AFDN-AS1	715	neg
ENSG00000198221	AFDN-AS1	584	neg
ENSG00000198221	AFDN-AS1	976	neg
ENSG00000198221	AFDN-AS1	952	neg
ENSG00000198221	AFDN-AS1	1986	neg
ENSG00000198221	AFDN-AS1	367	neg
ENSG00000198221	AFDN-AS1	836	neg
ENSG00000198221	AFDN-AS1	1526	neg
ENSG00000198221	AFDN-AS1	1528	neg
ENSG00000198221	AFDN-AS1	868	neg
ENSG00000198221	AFDN-AS1	1036	neg
ENSG00000198221	AFDN-AS1	1674	neg
ENSG00000198221	AFDN-AS1	226	neg
ENSG00000198221	AFDN-AS1	1870	neg
ENSG00000198221	AFDN-AS1	197	neg
ENSG00000198221	AFDN-AS1	779	neg
ENSG00000198221	AFDN-AS1	1105	neg
ENSG00000198221	AFDN-AS1	1580	neg
ENSG00000198221	AFDN-AS1	1503	neg
ENSG00000198221	AFDN-AS1	1501	neg
ENSG00000198221	AFDN-AS1	1765	neg
ENSG00000198221	AFDN-AS1	479	neg
ENSG00000198221	AFDN-AS1	1779	neg
ENSG00000198221	AFDN-AS1	223	neg
ENSG00000198221	AFDN-AS1	559	neg
ENSG00000198468	FLVCR1-AS1	1800	neg
ENSG00000198468	FLVCR1-AS1	1168	pos
ENSG00000198468	FLVCR1-AS1	1503	pos
ENSG00000198468	FLVCR1-AS1	836	pos
ENSG00000198468	FLVCR1-AS1	976	pos
ENSG00000198468	FLVCR1-AS1	1639	pos
ENSG00000198468	FLVCR1-AS1	779	pos
ENSG00000198468	FLVCR1-AS1	223	pos
ENSG00000198468	FLVCR1-AS1	403	pos
ENSG00000198468	FLVCR1-AS1	474	pos
ENSG00000198468	FLVCR1-AS1	507	pos
ENSG00000198468	FLVCR1-AS1	1496	pos
ENSG00000198468	FLVCR1-AS1	755	pos
ENSG00000198468	FLVCR1-AS1	1448	pos
ENSG00000198468	FLVCR1-AS1	726	pos
ENSG00000198468	FLVCR1-AS1	505	pos
ENSG00000198468	FLVCR1-AS1	560	pos
ENSG00000198468	FLVCR1-AS1	268	pos
ENSG00000198468	FLVCR1-AS1	518	pos
ENSG00000198468	FLVCR1-AS1	1399	pos
ENSG00000198468	FLVCR1-AS1	471	neg
ENSG00000203321	C9orf41-AS1	1496	pos
ENSG00000203321	C9orf41-AS1	2014	neg
ENSG00000203321	C9orf41-AS1	329	pos
ENSG00000203321	C9orf41-AS1	1639	pos
ENSG00000203321	C9orf41-AS1	507	pos
ENSG00000203321	C9orf41-AS1	403	pos
ENSG00000203321	C9orf41-AS1	755	pos
ENSG00000203321	C9orf41-AS1	474	pos
ENSG00000203321	C9orf41-AS1	505	pos
ENSG00000203321	C9orf41-AS1	726	pos
ENSG00000203321	C9orf41-AS1	560	pos
ENSG00000203321	C9orf41-AS1	2592	pos
ENSG00000203321	C9orf41-AS1	518	pos
ENSG00000203321	C9orf41-AS1	1498	pos
ENSG00000203321	C9orf41-AS1	1399	pos
ENSG00000203321	C9orf41-AS1	268	pos
ENSG00000203321	C9orf41-AS1	471	neg
ENSG00000203321	C9orf41-AS1	354	pos
ENSG00000203362	AL355802.1	223	pos
ENSG00000203362	AL355802.1	1569	pos
ENSG00000203362	AL355802.1	1201	pos
ENSG00000203362	AL355802.1	1800	neg
ENSG00000203362	AL355802.1	581	pos
ENSG00000203362	AL355802.1	1526	pos
ENSG00000203362	AL355802.1	595	pos
ENSG00000203362	AL355802.1	976	pos
ENSG00000203362	AL355802.1	280	pos
ENSG00000203362	AL355802.1	1496	pos
ENSG00000203362	AL355802.1	1619	pos
ENSG00000203362	AL355802.1	474	pos
ENSG00000203362	AL355802.1	1448	pos
ENSG00000203362	AL355802.1	403	pos
ENSG00000203362	AL355802.1	1498	pos
ENSG00000203362	AL355802.1	755	pos
ENSG00000203362	AL355802.1	726	pos
ENSG00000203362	AL355802.1	471	neg
ENSG00000203362	AL355802.1	2592	pos
ENSG00000203362	AL355802.1	507	pos
ENSG00000203362	AL355802.1	560	pos
ENSG00000203362	AL355802.1	505	pos
ENSG00000203362	AL355802.1	518	pos
ENSG00000203362	AL355802.1	268	pos
ENSG00000203362	AL355802.1	176	pos
ENSG00000203362	AL355802.1	1399	pos
ENSG00000203362	AL355802.1	354	pos
ENSG00000203392	AC105020.1	283	neg
ENSG00000203392	AC105020.1	1013	neg
ENSG00000203392	AC105020.1	595	neg
ENSG00000203392	AC105020.1	1619	neg
ENSG00000203392	AC105020.1	2014	pos
ENSG00000203392	AC105020.1	2592	neg
ENSG00000203392	AC105020.1	1360	neg
ENSG00000203392	AC105020.1	1201	neg
ENSG00000203392	AC105020.1	280	neg
ENSG00000203392	AC105020.1	1303	neg
ENSG00000203392	AC105020.1	1500	neg
ENSG00000203392	AC105020.1	715	neg
ENSG00000203392	AC105020.1	757	neg
ENSG00000203392	AC105020.1	1639	neg
ENSG00000203392	AC105020.1	544	neg
ENSG00000203392	AC105020.1	725	neg
ENSG00000203392	AC105020.1	474	neg
ENSG00000203392	AC105020.1	1683	neg
ENSG00000203392	AC105020.1	1800	pos
ENSG00000203392	AC105020.1	1498	neg
ENSG00000203392	AC105020.1	505	neg
ENSG00000203392	AC105020.1	584	neg
ENSG00000203392	AC105020.1	1039	neg
ENSG00000203392	AC105020.1	2030	neg
ENSG00000203392	AC105020.1	952	neg
ENSG00000203392	AC105020.1	1448	neg
ENSG00000203392	AC105020.1	354	neg
ENSG00000203392	AC105020.1	1325	neg
ENSG00000203392	AC105020.1	1424	neg
ENSG00000203392	AC105020.1	958	neg
ENSG00000203392	AC105020.1	1168	neg
ENSG00000203392	AC105020.1	868	neg
ENSG00000203392	AC105020.1	836	neg
ENSG00000203392	AC105020.1	507	neg
ENSG00000203392	AC105020.1	1496	neg
ENSG00000203392	AC105020.1	755	neg
ENSG00000203392	AC105020.1	726	neg
ENSG00000203392	AC105020.1	1105	neg
ENSG00000203392	AC105020.1	1674	neg
ENSG00000203392	AC105020.1	1036	neg
ENSG00000203392	AC105020.1	935	neg
ENSG00000203392	AC105020.1	976	neg
ENSG00000203392	AC105020.1	176	neg
ENSG00000203392	AC105020.1	1870	neg
ENSG00000203392	AC105020.1	367	neg
ENSG00000203392	AC105020.1	403	neg
ENSG00000203392	AC105020.1	1986	neg
ENSG00000203392	AC105020.1	1528	neg
ENSG00000203392	AC105020.1	779	neg
ENSG00000203392	AC105020.1	471	pos
ENSG00000203392	AC105020.1	1501	neg
ENSG00000203392	AC105020.1	197	neg
ENSG00000203392	AC105020.1	1503	neg
ENSG00000203392	AC105020.1	268	neg
ENSG00000203392	AC105020.1	518	neg
ENSG00000203392	AC105020.1	1526	neg
ENSG00000203392	AC105020.1	795	neg
ENSG00000203392	AC105020.1	479	neg
ENSG00000203392	AC105020.1	1765	neg
ENSG00000203392	AC105020.1	560	neg
ENSG00000203392	AC105020.1	1399	neg
ENSG00000203392	AC105020.1	1580	neg
ENSG00000203392	AC105020.1	226	neg
ENSG00000203392	AC105020.1	223	neg
ENSG00000203392	AC105020.1	1779	neg
ENSG00000203392	AC105020.1	559	neg
ENSG00000203644	AC083799.1	354	pos
ENSG00000203644	AC083799.1	1683	pos
ENSG00000203644	AC083799.1	226	pos
ENSG00000203644	AC083799.1	1580	pos
ENSG00000203644	AC083799.1	471	neg
ENSG00000203644	AC083799.1	1424	pos
ENSG00000203644	AC083799.1	367	pos
ENSG00000203644	AC083799.1	518	pos
ENSG00000203644	AC083799.1	958	pos
ENSG00000203644	AC083799.1	1105	pos
ENSG00000203644	AC083799.1	2030	pos
ENSG00000203644	AC083799.1	1765	pos
ENSG00000203644	AC083799.1	403	pos
ENSG00000203644	AC083799.1	584	pos
ENSG00000203644	AC083799.1	479	pos
ENSG00000203644	AC083799.1	223	pos
ENSG00000203644	AC083799.1	868	pos
ENSG00000203644	AC083799.1	952	pos
ENSG00000203644	AC083799.1	1501	pos
ENSG00000203644	AC083799.1	715	pos
ENSG00000203644	AC083799.1	836	pos
ENSG00000203644	AC083799.1	1036	pos
ENSG00000203644	AC083799.1	1870	pos
ENSG00000203644	AC083799.1	1674	pos
ENSG00000203644	AC083799.1	1503	pos
ENSG00000203644	AC083799.1	779	pos
ENSG00000203721	LINC00862	1781	pos
ENSG00000203721	LINC00862	2014	pos
ENSG00000203721	LINC00862	1569	neg
ENSG00000203721	LINC00862	952	neg
ENSG00000203721	LINC00862	176	neg
ENSG00000203721	LINC00862	1201	neg
ENSG00000203721	LINC00862	1526	neg
ENSG00000203721	LINC00862	560	neg
ENSG00000203721	LINC00862	836	neg
ENSG00000203721	LINC00862	518	neg
ENSG00000203721	LINC00862	268	neg
ENSG00000203721	LINC00862	595	neg
ENSG00000203721	LINC00862	795	neg
ENSG00000203721	LINC00862	1696	pos
ENSG00000203721	LINC00862	1800	pos
ENSG00000203721	LINC00862	976	neg
ENSG00000203721	LINC00862	1424	neg
ENSG00000203721	LINC00862	1036	neg
ENSG00000203721	LINC00862	492	pos
ENSG00000203721	LINC00862	1399	neg
ENSG00000203721	LINC00862	1639	neg
ENSG00000203721	LINC00862	197	neg
ENSG00000203721	LINC00862	1448	neg
ENSG00000203721	LINC00862	474	neg
ENSG00000203721	LINC00862	1503	neg
ENSG00000203721	LINC00862	726	neg
ENSG00000203721	LINC00862	1986	neg
ENSG00000203721	LINC00862	779	neg
ENSG00000203721	LINC00862	1105	neg
ENSG00000203721	LINC00862	226	neg
ENSG00000203721	LINC00862	223	neg
ENSG00000203721	LINC00862	1501	neg
ENSG00000203721	LINC00862	505	neg
ENSG00000203721	LINC00862	471	pos
ENSG00000203721	LINC00862	479	neg
ENSG00000203721	LINC00862	1765	neg
ENSG00000203721	LINC00862	1580	neg
ENSG00000203721	LINC00862	1779	neg
ENSG00000203721	LINC00862	559	neg
ENSG00000203875	SNHG5	726	pos
ENSG00000203875	SNHG5	1168	pos
ENSG00000203875	SNHG5	868	pos
ENSG00000203875	SNHG5	584	pos
ENSG00000203875	SNHG5	1039	pos
ENSG00000203875	SNHG5	779	pos
ENSG00000203875	SNHG5	197	pos
ENSG00000203875	SNHG5	725	pos
ENSG00000203875	SNHG5	1781	neg
ENSG00000203875	SNHG5	1500	pos
ENSG00000203875	SNHG5	1325	pos
ENSG00000203875	SNHG5	1424	pos
ENSG00000203875	SNHG5	1683	pos
ENSG00000203875	SNHG5	1870	pos
ENSG00000203875	SNHG5	1674	pos
ENSG00000203875	SNHG5	1036	pos
ENSG00000203875	SNHG5	1303	pos
ENSG00000203875	SNHG5	1503	pos
ENSG00000203875	SNHG5	976	pos
ENSG00000203875	SNHG5	367	pos
ENSG00000203875	SNHG5	2030	pos
ENSG00000203875	SNHG5	1105	pos
ENSG00000203875	SNHG5	1501	pos
ENSG00000203875	SNHG5	223	pos
ENSG00000203875	SNHG5	1528	pos
ENSG00000203875	SNHG5	479	pos
ENSG00000203875	SNHG5	795	pos
ENSG00000203875	SNHG5	1526	pos
ENSG00000203875	SNHG5	471	neg
ENSG00000203875	SNHG5	1986	pos
ENSG00000203875	SNHG5	226	pos
ENSG00000203875	SNHG5	1765	pos
ENSG00000203875	SNHG5	935	pos
ENSG00000203875	SNHG5	1580	pos
ENSG00000203875	SNHG5	1779	pos
ENSG00000203875	SNHG5	559	pos
ENSG00000203993	ARRDC1-AS1	1639	pos
ENSG00000203993	ARRDC1-AS1	223	pos
ENSG00000203993	ARRDC1-AS1	176	pos
ENSG00000203993	ARRDC1-AS1	726	pos
ENSG00000203993	ARRDC1-AS1	1448	pos
ENSG00000203993	ARRDC1-AS1	1496	pos
ENSG00000203993	ARRDC1-AS1	471	neg
ENSG00000203993	ARRDC1-AS1	474	pos
ENSG00000203993	ARRDC1-AS1	403	pos
ENSG00000203993	ARRDC1-AS1	755	pos
ENSG00000203993	ARRDC1-AS1	505	pos
ENSG00000203993	ARRDC1-AS1	1498	pos
ENSG00000203993	ARRDC1-AS1	507	pos
ENSG00000203993	ARRDC1-AS1	518	pos
ENSG00000203993	ARRDC1-AS1	560	pos
ENSG00000203993	ARRDC1-AS1	354	pos
ENSG00000203993	ARRDC1-AS1	268	pos
ENSG00000203993	ARRDC1-AS1	1399	pos
ENSG00000204054	LINC00963	725	neg
ENSG00000204054	LINC00963	584	neg
ENSG00000204054	LINC00963	1528	neg
ENSG00000204054	LINC00963	715	neg
ENSG00000204054	LINC00963	581	neg
ENSG00000204054	LINC00963	1168	neg
ENSG00000204054	LINC00963	1619	neg
ENSG00000204054	LINC00963	367	neg
ENSG00000204054	LINC00963	952	neg
ENSG00000204054	LINC00963	1639	neg
ENSG00000204054	LINC00963	1201	neg
ENSG00000204054	LINC00963	2592	neg
ENSG00000204054	LINC00963	544	neg
ENSG00000204054	LINC00963	1360	neg
ENSG00000204054	LINC00963	505	neg
ENSG00000204054	LINC00963	595	neg
ENSG00000204054	LINC00963	1013	neg
ENSG00000204054	LINC00963	1105	neg
ENSG00000204054	LINC00963	868	neg
ENSG00000204054	LINC00963	280	neg
ENSG00000204054	LINC00963	726	neg
ENSG00000204054	LINC00963	2030	neg
ENSG00000204054	LINC00963	836	neg
ENSG00000204054	LINC00963	935	neg
ENSG00000204054	LINC00963	1496	neg
ENSG00000204054	LINC00963	474	neg
ENSG00000204054	LINC00963	1448	neg
ENSG00000204054	LINC00963	1526	neg
ENSG00000204054	LINC00963	1986	neg
ENSG00000204054	LINC00963	1036	neg
ENSG00000204054	LINC00963	1674	neg
ENSG00000204054	LINC00963	1498	neg
ENSG00000204054	LINC00963	197	neg
ENSG00000204054	LINC00963	976	neg
ENSG00000204054	LINC00963	1501	neg
ENSG00000204054	LINC00963	507	neg
ENSG00000204054	LINC00963	795	neg
ENSG00000204054	LINC00963	755	neg
ENSG00000204054	LINC00963	779	neg
ENSG00000204054	LINC00963	1870	neg
ENSG00000204054	LINC00963	1765	neg
ENSG00000204054	LINC00963	479	neg
ENSG00000204054	LINC00963	1580	neg
ENSG00000204054	LINC00963	1503	neg
ENSG00000204054	LINC00963	471	pos
ENSG00000204054	LINC00963	226	neg
ENSG00000204054	LINC00963	403	neg
ENSG00000204054	LINC00963	354	neg
ENSG00000204054	LINC00963	176	neg
ENSG00000204054	LINC00963	268	neg
ENSG00000204054	LINC00963	560	neg
ENSG00000204054	LINC00963	1399	neg
ENSG00000204054	LINC00963	1779	neg
ENSG00000204054	LINC00963	223	neg
ENSG00000204054	LINC00963	518	neg
ENSG00000204054	LINC00963	559	neg
ENSG00000204055	AL158151.1	1986	neg
ENSG00000204055	AL158151.1	268	neg
ENSG00000204055	AL158151.1	518	neg
ENSG00000204055	AL158151.1	958	neg
ENSG00000204055	AL158151.1	1039	neg
ENSG00000204055	AL158151.1	1325	neg
ENSG00000204055	AL158151.1	2030	neg
ENSG00000204055	AL158151.1	560	neg
ENSG00000204055	AL158151.1	507	neg
ENSG00000204055	AL158151.1	1168	neg
ENSG00000204055	AL158151.1	725	neg
ENSG00000204055	AL158151.1	1423	neg
ENSG00000204055	AL158151.1	544	neg
ENSG00000204055	AL158151.1	1683	neg
ENSG00000204055	AL158151.1	1424	neg
ENSG00000204055	AL158151.1	1496	neg
ENSG00000204055	AL158151.1	1303	neg
ENSG00000204055	AL158151.1	197	neg
ENSG00000204055	AL158151.1	755	neg
ENSG00000204055	AL158151.1	559	neg
ENSG00000204055	AL158151.1	715	neg
ENSG00000204055	AL158151.1	935	neg
ENSG00000204055	AL158151.1	584	neg
ENSG00000204055	AL158151.1	176	neg
ENSG00000204055	AL158151.1	868	neg
ENSG00000204055	AL158151.1	952	neg
ENSG00000204055	AL158151.1	1674	neg
ENSG00000204055	AL158151.1	836	neg
ENSG00000204055	AL158151.1	1503	neg
ENSG00000204055	AL158151.1	1779	neg
ENSG00000204055	AL158151.1	1036	neg
ENSG00000204055	AL158151.1	1870	neg
ENSG00000204055	AL158151.1	1528	neg
ENSG00000204055	AL158151.1	1448	neg
ENSG00000204055	AL158151.1	1105	neg
ENSG00000204055	AL158151.1	367	neg
ENSG00000204055	AL158151.1	1526	neg
ENSG00000204055	AL158151.1	1501	neg
ENSG00000204055	AL158151.1	779	neg
ENSG00000204055	AL158151.1	479	neg
ENSG00000204055	AL158151.1	226	neg
ENSG00000204055	AL158151.1	1765	neg
ENSG00000204055	AL158151.1	1580	neg
ENSG00000204055	AL158151.1	976	neg
ENSG00000204055	AL158151.1	795	neg
ENSG00000204055	AL158151.1	223	neg
ENSG00000204362	AL590644.1	836	neg
ENSG00000204362	AL590644.1	1870	neg
ENSG00000204362	AL590644.1	1528	neg
ENSG00000204362	AL590644.1	1569	neg
ENSG00000204362	AL590644.1	958	neg
ENSG00000204362	AL590644.1	1105	neg
ENSG00000204362	AL590644.1	1503	neg
ENSG00000204362	AL590644.1	2014	pos
ENSG00000204362	AL590644.1	1501	neg
ENSG00000204362	AL590644.1	492	pos
ENSG00000204362	AL590644.1	1696	pos
ENSG00000204362	AL590644.1	1526	neg
ENSG00000204362	AL590644.1	1639	neg
ENSG00000204362	AL590644.1	795	neg
ENSG00000204362	AL590644.1	779	neg
ENSG00000204362	AL590644.1	474	neg
ENSG00000204362	AL590644.1	1448	neg
ENSG00000204362	AL590644.1	976	neg
ENSG00000204362	AL590644.1	1765	neg
ENSG00000204362	AL590644.1	1498	neg
ENSG00000204362	AL590644.1	1800	pos
ENSG00000204362	AL590644.1	479	neg
ENSG00000204362	AL590644.1	1496	neg
ENSG00000204362	AL590644.1	197	neg
ENSG00000204362	AL590644.1	755	neg
ENSG00000204362	AL590644.1	176	neg
ENSG00000204362	AL590644.1	1986	neg
ENSG00000204362	AL590644.1	403	neg
ENSG00000204362	AL590644.1	507	neg
ENSG00000204362	AL590644.1	354	neg
ENSG00000204362	AL590644.1	226	neg
ENSG00000204362	AL590644.1	1580	neg
ENSG00000204362	AL590644.1	223	neg
ENSG00000204362	AL590644.1	518	neg
ENSG00000204362	AL590644.1	268	neg
ENSG00000204362	AL590644.1	367	neg
ENSG00000204362	AL590644.1	726	neg
ENSG00000204362	AL590644.1	560	neg
ENSG00000204362	AL590644.1	1399	neg
ENSG00000204362	AL590644.1	1779	neg
ENSG00000204362	AL590644.1	505	neg
ENSG00000204362	AL590644.1	559	neg
ENSG00000204362	AL590644.1	471	pos
ENSG00000204528	PSORS1C3	1503	neg
ENSG00000204528	PSORS1C3	1870	neg
ENSG00000204528	PSORS1C3	1569	neg
ENSG00000204528	PSORS1C3	1501	neg
ENSG00000204528	PSORS1C3	1013	neg
ENSG00000204528	PSORS1C3	1526	neg
ENSG00000204528	PSORS1C3	958	neg
ENSG00000204528	PSORS1C3	976	neg
ENSG00000204528	PSORS1C3	1036	neg
ENSG00000204528	PSORS1C3	836	neg
ENSG00000204528	PSORS1C3	354	neg
ENSG00000204528	PSORS1C3	1498	neg
ENSG00000204528	PSORS1C3	197	neg
ENSG00000204528	PSORS1C3	779	neg
ENSG00000204528	PSORS1C3	1639	neg
ENSG00000204528	PSORS1C3	1168	neg
ENSG00000204528	PSORS1C3	1448	neg
ENSG00000204528	PSORS1C3	1496	neg
ENSG00000204528	PSORS1C3	176	neg
ENSG00000204528	PSORS1C3	560	neg
ENSG00000204528	PSORS1C3	223	neg
ENSG00000204528	PSORS1C3	518	neg
ENSG00000204528	PSORS1C3	268	neg
ENSG00000204528	PSORS1C3	507	neg
ENSG00000204528	PSORS1C3	471	pos
ENSG00000204528	PSORS1C3	474	neg
ENSG00000204528	PSORS1C3	755	neg
ENSG00000204528	PSORS1C3	726	neg
ENSG00000204528	PSORS1C3	505	neg
ENSG00000204528	PSORS1C3	1399	neg
ENSG00000204709	LINC01556	1501	neg
ENSG00000204709	LINC01556	479	neg
ENSG00000204709	LINC01556	836	neg
ENSG00000204709	LINC01556	1036	neg
ENSG00000204709	LINC01556	1399	neg
ENSG00000204709	LINC01556	283	neg
ENSG00000204709	LINC01556	755	neg
ENSG00000204709	LINC01556	1013	neg
ENSG00000204709	LINC01556	505	neg
ENSG00000204709	LINC01556	176	neg
ENSG00000204709	LINC01556	223	neg
ENSG00000204709	LINC01556	779	neg
ENSG00000205334	LINC01460	560	neg
ENSG00000205334	LINC01460	1503	neg
ENSG00000205334	LINC01460	595	neg
ENSG00000205334	LINC01460	518	neg
ENSG00000205334	LINC01460	935	neg
ENSG00000205334	LINC01460	1569	neg
ENSG00000205334	LINC01460	1498	neg
ENSG00000205334	LINC01460	1526	neg
ENSG00000205334	LINC01460	2014	pos
ENSG00000205334	LINC01460	779	neg
ENSG00000205334	LINC01460	1501	neg
ENSG00000205334	LINC01460	976	neg
ENSG00000205334	LINC01460	1105	neg
ENSG00000205334	LINC01460	492	pos
ENSG00000205334	LINC01460	1201	neg
ENSG00000205334	LINC01460	1696	pos
ENSG00000205334	LINC01460	268	neg
ENSG00000205334	LINC01460	1399	neg
ENSG00000205334	LINC01460	1619	neg
ENSG00000205334	LINC01460	1639	neg
ENSG00000205334	LINC01460	1515	neg
ENSG00000205334	LINC01460	1496	neg
ENSG00000205334	LINC01460	1800	pos
ENSG00000205334	LINC01460	507	neg
ENSG00000205334	LINC01460	226	neg
ENSG00000205334	LINC01460	223	neg
ENSG00000205334	LINC01460	1765	neg
ENSG00000205334	LINC01460	474	neg
ENSG00000205334	LINC01460	479	neg
ENSG00000205334	LINC01460	1580	neg
ENSG00000205334	LINC01460	726	neg
ENSG00000205334	LINC01460	1448	neg
ENSG00000205334	LINC01460	471	pos
ENSG00000205334	LINC01460	505	neg
ENSG00000205334	LINC01460	1779	neg
ENSG00000205334	LINC01460	559	neg
ENSG00000205488	CALML3-AS1	726	neg
ENSG00000205488	CALML3-AS1	1423	neg
ENSG00000205488	CALML3-AS1	283	neg
ENSG00000205488	CALML3-AS1	868	neg
ENSG00000205488	CALML3-AS1	725	neg
ENSG00000205488	CALML3-AS1	354	neg
ENSG00000205488	CALML3-AS1	2030	neg
ENSG00000205488	CALML3-AS1	1039	neg
ENSG00000205488	CALML3-AS1	544	neg
ENSG00000205488	CALML3-AS1	958	neg
ENSG00000205488	CALML3-AS1	715	neg
ENSG00000205488	CALML3-AS1	268	neg
ENSG00000205488	CALML3-AS1	1360	neg
ENSG00000205488	CALML3-AS1	413	neg
ENSG00000205488	CALML3-AS1	1496	neg
ENSG00000205488	CALML3-AS1	507	neg
ENSG00000205488	CALML3-AS1	584	neg
ENSG00000205488	CALML3-AS1	176	neg
ENSG00000205488	CALML3-AS1	1325	neg
ENSG00000205488	CALML3-AS1	755	neg
ENSG00000205488	CALML3-AS1	952	neg
ENSG00000205488	CALML3-AS1	836	neg
ENSG00000205488	CALML3-AS1	1674	neg
ENSG00000205488	CALML3-AS1	1870	neg
ENSG00000205488	CALML3-AS1	560	neg
ENSG00000205488	CALML3-AS1	1448	neg
ENSG00000205488	CALML3-AS1	518	neg
ENSG00000205488	CALML3-AS1	1503	neg
ENSG00000205488	CALML3-AS1	1168	neg
ENSG00000205488	CALML3-AS1	1399	neg
ENSG00000205488	CALML3-AS1	1036	neg
ENSG00000205488	CALML3-AS1	795	neg
ENSG00000205488	CALML3-AS1	1105	neg
ENSG00000205488	CALML3-AS1	757	neg
ENSG00000205488	CALML3-AS1	976	neg
ENSG00000205488	CALML3-AS1	779	neg
ENSG00000205488	CALML3-AS1	367	neg
ENSG00000205488	CALML3-AS1	1526	neg
ENSG00000205488	CALML3-AS1	935	neg
ENSG00000205488	CALML3-AS1	1501	neg
ENSG00000205488	CALML3-AS1	1986	neg
ENSG00000205488	CALML3-AS1	1528	neg
ENSG00000205488	CALML3-AS1	226	neg
ENSG00000205488	CALML3-AS1	479	neg
ENSG00000205488	CALML3-AS1	1765	neg
ENSG00000205488	CALML3-AS1	1580	neg
ENSG00000205488	CALML3-AS1	223	neg
ENSG00000205488	CALML3-AS1	1779	neg
ENSG00000205488	CALML3-AS1	559	neg
ENSG00000205664	BX890604.1	197	pos
ENSG00000205664	BX890604.1	1569	pos
ENSG00000205664	BX890604.1	958	pos
ENSG00000205664	BX890604.1	507	pos
ENSG00000205664	BX890604.1	1639	pos
ENSG00000205664	BX890604.1	176	pos
ENSG00000205664	BX890604.1	1526	pos
ENSG00000205664	BX890604.1	2592	pos
ENSG00000205664	BX890604.1	403	pos
ENSG00000205664	BX890604.1	354	pos
ENSG00000205664	BX890604.1	976	pos
ENSG00000205664	BX890604.1	1986	pos
ENSG00000205664	BX890604.1	1503	pos
ENSG00000205664	BX890604.1	726	pos
ENSG00000205664	BX890604.1	505	pos
ENSG00000205664	BX890604.1	479	pos
ENSG00000205664	BX890604.1	474	pos
ENSG00000205664	BX890604.1	1448	pos
ENSG00000205664	BX890604.1	755	pos
ENSG00000205664	BX890604.1	795	pos
ENSG00000205664	BX890604.1	1498	pos
ENSG00000205664	BX890604.1	268	pos
ENSG00000205664	BX890604.1	518	pos
ENSG00000205664	BX890604.1	1399	pos
ENSG00000205664	BX890604.1	560	pos
ENSG00000205664	BX890604.1	471	neg
ENSG00000205664	BX890604.1	1779	pos
ENSG00000205664	BX890604.1	559	pos
ENSG00000205790	DPP9-AS1	471	neg
ENSG00000205790	DPP9-AS1	2592	pos
ENSG00000205790	DPP9-AS1	268	pos
ENSG00000205790	DPP9-AS1	1399	pos
ENSG00000205790	DPP9-AS1	403	pos
ENSG00000205790	DPP9-AS1	560	pos
ENSG00000205790	DPP9-AS1	354	pos
ENSG00000206532	AC117402.1	595	neg
ENSG00000206532	AC117402.1	1498	neg
ENSG00000206532	AC117402.1	1781	pos
ENSG00000206532	AC117402.1	1696	pos
ENSG00000206532	AC117402.1	197	neg
ENSG00000206532	AC117402.1	1500	neg
ENSG00000206532	AC117402.1	1619	neg
ENSG00000206532	AC117402.1	755	neg
ENSG00000206532	AC117402.1	976	neg
ENSG00000206532	AC117402.1	1399	neg
ENSG00000206532	AC117402.1	492	pos
ENSG00000206532	AC117402.1	367	neg
ENSG00000206532	AC117402.1	1526	neg
ENSG00000206532	AC117402.1	1503	neg
ENSG00000206532	AC117402.1	1800	pos
ENSG00000206532	AC117402.1	560	neg
ENSG00000206532	AC117402.1	1303	neg
ENSG00000206532	AC117402.1	1986	neg
ENSG00000206532	AC117402.1	518	neg
ENSG00000206532	AC117402.1	268	neg
ENSG00000206532	AC117402.1	1501	neg
ENSG00000206532	AC117402.1	354	neg
ENSG00000206532	AC117402.1	795	neg
ENSG00000206532	AC117402.1	1496	neg
ENSG00000206532	AC117402.1	779	neg
ENSG00000206532	AC117402.1	507	neg
ENSG00000206532	AC117402.1	403	neg
ENSG00000206532	AC117402.1	1105	neg
ENSG00000206532	AC117402.1	474	neg
ENSG00000206532	AC117402.1	223	neg
ENSG00000206532	AC117402.1	935	neg
ENSG00000206532	AC117402.1	479	neg
ENSG00000206532	AC117402.1	726	neg
ENSG00000206532	AC117402.1	505	neg
ENSG00000206532	AC117402.1	1448	neg
ENSG00000206532	AC117402.1	226	neg
ENSG00000206532	AC117402.1	1765	neg
ENSG00000206532	AC117402.1	1580	neg
ENSG00000206532	AC117402.1	471	pos
ENSG00000206532	AC117402.1	1779	neg
ENSG00000206532	AC117402.1	559	neg
ENSG00000212743	AL137145.1	518	neg
ENSG00000212743	AL137145.1	935	neg
ENSG00000212743	AL137145.1	283	neg
ENSG00000212743	AL137145.1	367	neg
ENSG00000212743	AL137145.1	1526	neg
ENSG00000212743	AL137145.1	1515	neg
ENSG00000212743	AL137145.1	584	neg
ENSG00000212743	AL137145.1	1360	neg
ENSG00000212743	AL137145.1	2014	neg
ENSG00000212743	AL137145.1	976	neg
ENSG00000212743	AL137145.1	1423	neg
ENSG00000212743	AL137145.1	297	neg
ENSG00000212743	AL137145.1	1039	neg
ENSG00000212743	AL137145.1	413	neg
ENSG00000212743	AL137145.1	507	neg
ENSG00000212743	AL137145.1	1325	neg
ENSG00000212743	AL137145.1	755	neg
ENSG00000212743	AL137145.1	1448	neg
ENSG00000212743	AL137145.1	725	neg
ENSG00000212743	AL137145.1	958	neg
ENSG00000212743	AL137145.1	757	neg
ENSG00000212743	AL137145.1	226	neg
ENSG00000212743	AL137145.1	1580	neg
ENSG00000212743	AL137145.1	176	neg
ENSG00000212743	AL137145.1	2030	neg
ENSG00000212743	AL137145.1	1528	neg
ENSG00000212743	AL137145.1	581	neg
ENSG00000212743	AL137145.1	1168	neg
ENSG00000212743	AL137145.1	197	neg
ENSG00000212743	AL137145.1	1105	neg
ENSG00000212743	AL137145.1	1765	neg
ENSG00000212743	AL137145.1	544	neg
ENSG00000212743	AL137145.1	479	neg
ENSG00000212743	AL137145.1	952	neg
ENSG00000212743	AL137145.1	868	neg
ENSG00000212743	AL137145.1	1503	neg
ENSG00000212743	AL137145.1	715	neg
ENSG00000212743	AL137145.1	1501	neg
ENSG00000212743	AL137145.1	779	neg
ENSG00000212743	AL137145.1	1674	neg
ENSG00000212743	AL137145.1	1870	neg
ENSG00000212743	AL137145.1	836	neg
ENSG00000212743	AL137145.1	1036	neg
ENSG00000212743	AL137145.1	223	neg
ENSG00000213279	Z97192.2	779	pos
ENSG00000213279	Z97192.2	1105	pos
ENSG00000213279	Z97192.2	1503	pos
ENSG00000213279	Z97192.2	1619	pos
ENSG00000213279	Z97192.2	197	pos
ENSG00000213279	Z97192.2	2014	neg
ENSG00000213279	Z97192.2	1569	pos
ENSG00000213279	Z97192.2	958	pos
ENSG00000213279	Z97192.2	1168	pos
ENSG00000213279	Z97192.2	176	pos
ENSG00000213279	Z97192.2	479	pos
ENSG00000213279	Z97192.2	474	pos
ENSG00000213279	Z97192.2	354	pos
ENSG00000213279	Z97192.2	1639	pos
ENSG00000213279	Z97192.2	1765	pos
ENSG00000213279	Z97192.2	403	pos
ENSG00000213279	Z97192.2	584	pos
ENSG00000213279	Z97192.2	1498	pos
ENSG00000213279	Z97192.2	1800	neg
ENSG00000213279	Z97192.2	935	pos
ENSG00000213279	Z97192.2	226	pos
ENSG00000213279	Z97192.2	507	pos
ENSG00000213279	Z97192.2	1448	pos
ENSG00000213279	Z97192.2	1496	pos
ENSG00000213279	Z97192.2	223	pos
ENSG00000213279	Z97192.2	1580	pos
ENSG00000213279	Z97192.2	1399	pos
ENSG00000213279	Z97192.2	505	pos
ENSG00000213279	Z97192.2	1528	pos
ENSG00000213279	Z97192.2	268	pos
ENSG00000213279	Z97192.2	726	pos
ENSG00000213279	Z97192.2	560	pos
ENSG00000213279	Z97192.2	518	pos
ENSG00000213279	Z97192.2	795	pos
ENSG00000213279	Z97192.2	1986	pos
ENSG00000213279	Z97192.2	976	pos
ENSG00000213279	Z97192.2	1526	pos
ENSG00000213279	Z97192.2	367	pos
ENSG00000213279	Z97192.2	755	pos
ENSG00000213279	Z97192.2	471	neg
ENSG00000213279	Z97192.2	1779	pos
ENSG00000213279	Z97192.2	559	pos
ENSG00000213994	AL157395.1	755	neg
ENSG00000213994	AL157395.1	795	neg
ENSG00000213994	AL157395.1	559	neg
ENSG00000213994	AL157395.1	1779	neg
ENSG00000213994	AL157395.1	1496	neg
ENSG00000213994	AL157395.1	1039	neg
ENSG00000213994	AL157395.1	1580	neg
ENSG00000213994	AL157395.1	1528	neg
ENSG00000213994	AL157395.1	725	neg
ENSG00000213994	AL157395.1	197	neg
ENSG00000213994	AL157395.1	952	neg
ENSG00000213994	AL157395.1	715	neg
ENSG00000213994	AL157395.1	226	neg
ENSG00000213994	AL157395.1	1765	neg
ENSG00000213994	AL157395.1	836	neg
ENSG00000213994	AL157395.1	1105	neg
ENSG00000213994	AL157395.1	479	neg
ENSG00000213994	AL157395.1	1503	neg
ENSG00000213994	AL157395.1	1674	neg
ENSG00000213994	AL157395.1	1036	neg
ENSG00000213994	AL157395.1	868	neg
ENSG00000213994	AL157395.1	779	neg
ENSG00000213994	AL157395.1	1501	neg
ENSG00000213994	AL157395.1	1870	neg
ENSG00000213994	AL157395.1	223	neg
ENSG00000214145	LINC00887	581	neg
ENSG00000214145	LINC00887	752	neg
ENSG00000214145	LINC00887	2030	neg
ENSG00000214145	LINC00887	757	neg
ENSG00000214145	LINC00887	1515	neg
ENSG00000214145	LINC00887	1360	neg
ENSG00000214145	LINC00887	1325	neg
ENSG00000214145	LINC00887	507	neg
ENSG00000214145	LINC00887	726	neg
ENSG00000214145	LINC00887	1569	neg
ENSG00000214145	LINC00887	1201	neg
ENSG00000214145	LINC00887	505	neg
ENSG00000214145	LINC00887	280	neg
ENSG00000214145	LINC00887	1039	neg
ENSG00000214145	LINC00887	403	neg
ENSG00000214145	LINC00887	1423	neg
ENSG00000214145	LINC00887	595	neg
ENSG00000214145	LINC00887	725	neg
ENSG00000214145	LINC00887	1013	neg
ENSG00000214145	LINC00887	755	neg
ENSG00000214145	LINC00887	544	neg
ENSG00000214145	LINC00887	1496	neg
ENSG00000214145	LINC00887	560	neg
ENSG00000214145	LINC00887	268	neg
ENSG00000214145	LINC00887	518	neg
ENSG00000214145	LINC00887	715	neg
ENSG00000214145	LINC00887	868	neg
ENSG00000214145	LINC00887	1399	neg
ENSG00000214145	LINC00887	1448	neg
ENSG00000214145	LINC00887	958	neg
ENSG00000214145	LINC00887	952	neg
ENSG00000214145	LINC00887	836	neg
ENSG00000214145	LINC00887	1674	neg
ENSG00000214145	LINC00887	935	neg
ENSG00000214145	LINC00887	1168	neg
ENSG00000214145	LINC00887	1528	neg
ENSG00000214145	LINC00887	1870	neg
ENSG00000214145	LINC00887	1503	neg
ENSG00000214145	LINC00887	584	neg
ENSG00000214145	LINC00887	1036	neg
ENSG00000214145	LINC00887	176	neg
ENSG00000214145	LINC00887	197	neg
ENSG00000214145	LINC00887	1986	neg
ENSG00000214145	LINC00887	795	neg
ENSG00000214145	LINC00887	779	neg
ENSG00000214145	LINC00887	1105	neg
ENSG00000214145	LINC00887	226	neg
ENSG00000214145	LINC00887	976	neg
ENSG00000214145	LINC00887	1501	neg
ENSG00000214145	LINC00887	1526	neg
ENSG00000214145	LINC00887	367	neg
ENSG00000214145	LINC00887	479	neg
ENSG00000214145	LINC00887	1765	neg
ENSG00000214145	LINC00887	1580	neg
ENSG00000214145	LINC00887	223	neg
ENSG00000214145	LINC00887	1779	neg
ENSG00000214145	LINC00887	559	neg
ENSG00000214248	AC010336.1	1639	pos
ENSG00000214248	AC010336.1	1800	neg
ENSG00000214248	AC010336.1	1696	neg
ENSG00000214248	AC010336.1	2014	neg
ENSG00000214248	AC010336.1	518	pos
ENSG00000214248	AC010336.1	403	pos
ENSG00000214248	AC010336.1	560	pos
ENSG00000214248	AC010336.1	268	pos
ENSG00000214248	AC010336.1	474	pos
ENSG00000214248	AC010336.1	1399	pos
ENSG00000214248	AC010336.1	726	pos
ENSG00000214248	AC010336.1	505	pos
ENSG00000214248	AC010336.1	471	neg
ENSG00000214708	AC116407.1	413	neg
ENSG00000214708	AC116407.1	1639	neg
ENSG00000214708	AC116407.1	595	neg
ENSG00000214708	AC116407.1	1013	neg
ENSG00000214708	AC116407.1	757	neg
ENSG00000214708	AC116407.1	280	neg
ENSG00000214708	AC116407.1	507	neg
ENSG00000214708	AC116407.1	752	neg
ENSG00000214708	AC116407.1	1303	neg
ENSG00000214708	AC116407.1	505	neg
ENSG00000214708	AC116407.1	868	neg
ENSG00000214708	AC116407.1	1325	neg
ENSG00000214708	AC116407.1	726	neg
ENSG00000214708	AC116407.1	1496	neg
ENSG00000214708	AC116407.1	283	neg
ENSG00000214708	AC116407.1	715	neg
ENSG00000214708	AC116407.1	403	neg
ENSG00000214708	AC116407.1	354	neg
ENSG00000214708	AC116407.1	836	neg
ENSG00000214708	AC116407.1	2592	neg
ENSG00000214708	AC116407.1	581	neg
ENSG00000214708	AC116407.1	1168	neg
ENSG00000214708	AC116407.1	958	neg
ENSG00000214708	AC116407.1	952	neg
ENSG00000214708	AC116407.1	197	neg
ENSG00000214708	AC116407.1	2030	neg
ENSG00000214708	AC116407.1	1870	neg
ENSG00000214708	AC116407.1	1674	neg
ENSG00000214708	AC116407.1	176	neg
ENSG00000214708	AC116407.1	544	neg
ENSG00000214708	AC116407.1	1360	neg
ENSG00000214708	AC116407.1	1036	neg
ENSG00000214708	AC116407.1	1503	neg
ENSG00000214708	AC116407.1	584	neg
ENSG00000214708	AC116407.1	1105	neg
ENSG00000214708	AC116407.1	1986	neg
ENSG00000214708	AC116407.1	755	neg
ENSG00000214708	AC116407.1	935	neg
ENSG00000214708	AC116407.1	1448	neg
ENSG00000214708	AC116407.1	779	neg
ENSG00000214708	AC116407.1	1528	neg
ENSG00000214708	AC116407.1	268	neg
ENSG00000214708	AC116407.1	518	neg
ENSG00000214708	AC116407.1	1399	neg
ENSG00000214708	AC116407.1	560	neg
ENSG00000214708	AC116407.1	1501	neg
ENSG00000214708	AC116407.1	479	neg
ENSG00000214708	AC116407.1	795	neg
ENSG00000214708	AC116407.1	1580	neg
ENSG00000214708	AC116407.1	226	neg
ENSG00000214708	AC116407.1	976	neg
ENSG00000214708	AC116407.1	1765	neg
ENSG00000214708	AC116407.1	1526	neg
ENSG00000214708	AC116407.1	367	neg
ENSG00000214708	AC116407.1	223	neg
ENSG00000214708	AC116407.1	1779	neg
ENSG00000214708	AC116407.1	559	neg
ENSG00000214922	HLA-F-AS1	715	neg
ENSG00000214922	HLA-F-AS1	2030	neg
ENSG00000214922	HLA-F-AS1	1105	neg
ENSG00000214922	HLA-F-AS1	1569	neg
ENSG00000214922	HLA-F-AS1	1800	pos
ENSG00000214922	HLA-F-AS1	1424	neg
ENSG00000214922	HLA-F-AS1	1528	neg
ENSG00000214922	HLA-F-AS1	952	neg
ENSG00000214922	HLA-F-AS1	1765	neg
ENSG00000214922	HLA-F-AS1	1639	neg
ENSG00000214922	HLA-F-AS1	935	neg
ENSG00000214922	HLA-F-AS1	507	neg
ENSG00000214922	HLA-F-AS1	868	neg
ENSG00000214922	HLA-F-AS1	367	neg
[truncated: 32,228 more rows]

## Sheet: Supplementary file 1g
Supplementary file 1g: Meta-analysis derived potential proliferation/growth inducing lncRNAs.							Mitra et al.
Ensembl ID	Symbol	Average regression coefficients	FDR$
ENSG00000231607	DLEU2	0.263767	2.88101e-51
ENSG00000264577	AC010761.1	0.231598	9.91389e-51
ENSG00000234160	AL513165.1	0.268957	2.79687e-50
ENSG00000272269	AL138724.1	0.244749	4.10904e-44
ENSG00000271936	AC012073.1	0.296952	3.24814e-41
ENSG00000226950	DANCR	0.201056	1.83104e-35
ENSG00000215417	MIR17HG	0.224741	6.5346e-34
ENSG00000255121	AP003392.4	0.296428	9.19979e-34
ENSG00000247240	UBL7-AS1	0.217171	3.34737e-32
ENSG00000234171	RNASEH1-AS1	0.233715	6.32634e-32
ENSG00000267698	AC002116.2	0.217345	3.58639e-31
ENSG00000257167	TMPO-AS1	0.315696	6.17803e-30
ENSG00000266402	SNHG25	0.195728	1.65356e-29
ENSG00000255717	SNHG1	0.233626	1.7196e-28
ENSG00000261428	AC097461.1	0.228362	4.53316e-28
ENSG00000245322	AC097460.1	0.220384	2.55812e-27
ENSG00000237976	AL391069.3	0.22978	7.64162e-27
ENSG00000226688	ENTPD1-AS1	0.235147	8.77294e-27
ENSG00000163009	C2orf48	0.227816	1.13415e-26
ENSG00000269846	AL136172.1	0.247218	7.35927e-26
ENSG00000265415	AC099850.3	0.238634	1.02259e-24
ENSG00000242125	SNHG3	0.206091	3.09258e-24
ENSG00000263731	AC145207.5	0.221352	1.07603e-22
ENSG00000273162	AL133215.2	0.269111	1.57862e-22
ENSG00000232956	SNHG15	0.183827	3.78203e-22
ENSG00000272540	AL662797.3	0.258688	8.15589e-22
ENSG00000269534	AC011466.3	0.279125	1.41621e-19
ENSG00000228838	AL355483.2	0.20248	4.89771e-19
ENSG00000196756	SNHG17	0.18504	9.03108e-18
ENSG00000232762	AL355483.3	0.213488	4.02122e-17
ENSG00000266969	AP002449.1	0.224272	4.02122e-17
ENSG00000261061	AC092718.4	0.22856	1.39598e-16
ENSG00000245482	AC046130.1	0.279351	2.24567e-16
ENSG00000176124	DLEU1	0.181065	3.50971e-16
ENSG00000227963	AL355488.1	0.193207	4.9012e-16
ENSG00000267040	AC027097.1	0.215316	8.07228e-16
ENSG00000255857	PXN-AS1	0.185098	1.20713e-15
ENSG00000267255	AC011498.3	0.232726	6.92886e-15
ENSG00000249637	AC008438.1	0.200856	3.55301e-14
ENSG00000227598	Z94721.1	0.219939	8.57869e-14
ENSG00000259488	AC023355.1	0.244549	1.11493e-13
ENSG00000239791	AC002310.2	0.216879	2.59518e-13
ENSG00000233538	AC017104.3	0.178902	5.15228e-13
ENSG00000249084	AC027627.1	0.254988	2.78229e-12
ENSG00000262703	AC009121.1	0.241499	3.89159e-12
ENSG00000272716	AL121658.1	0.176405	4.284e-12
ENSG00000247151	CSTF3-AS1	0.21409	7.78907e-12
ENSG00000163597	SNHG16	0.193057	1.8651e-11
ENSG00000261886	AC005670.1	0.174519	4.02861e-11
ENSG00000247092	SNHG10	0.202496	5.08833e-11
ENSG00000272711	AC019069.1	0.178974	9.88161e-11
ENSG00000258857	AL359397.1	0.164601	9.89272e-11
ENSG00000230747	AC021188.1	0.209877	1.23974e-10
ENSG00000232335	AL354864.1	0.261923	1.52807e-10
ENSG00000234264	DEPDC1-AS1	0.192678	2.51974e-10
ENSG00000225163	LINC00618	0.203299	3.06553e-10
ENSG00000203875	SNHG5	0.192842	5.30824e-10
ENSG00000245248	USP2-AS1	0.187519	1.04927e-09
ENSG00000234129	AC073529.1	0.220053	1.13814e-09
ENSG00000260260	SNHG19	0.203278	1.19898e-09
ENSG00000233016	SNHG7	0.167271	4.8198e-09
ENSG00000249655	AC008434.1	0.263474	5.57697e-09
ENSG00000259469	AC084757.2	0.167359	7.24838e-09
ENSG00000267356	AC006557.3	0.224837	8.95694e-09
ENSG00000250988	SNHG21	0.168125	1.32582e-08
ENSG00000268289	AC020908.1	0.207384	1.33514e-08
ENSG00000261373	VPS9D1-AS1	0.151917	1.72784e-08
ENSG00000236308	AL138921.2	0.235837	2.97706e-08
ENSG00000263013	AC133065.4	0.203732	3.13339e-08
ENSG00000269974	AC091057.3	0.261696	6.35354e-08
ENSG00000234753	FOXP4-AS1	0.158432	1.02405e-07
ENSG00000257285	AL132780.1	0.25928	1.11946e-07
ENSG00000266801	AC009137.2	0.169623	1.47245e-07
ENSG00000273063	AC007250.1	0.164029	1.59244e-07
ENSG00000258344	AC078778.2	0.257666	1.71412e-07
ENSG00000272817	AL359198.1	0.178724	1.75163e-07
ENSG00000271754	AL355802.3	0.159108	2.49475e-07
ENSG00000260213	AC092718.2	0.272503	4.17626e-07
ENSG00000259254	AC022405.1	0.26427	4.68026e-07
ENSG00000234327	AC012146.1	0.178389	2.26468e-06
ENSG00000248996	AC145098.1	0.20417	3.0259e-06
ENSG00000251221	LINC01337	0.226877	4.07329e-06
ENSG00000269688	AC008982.2	0.219604	4.66593e-06
ENSG00000269951	AC090181.2	0.208395	4.77907e-06
ENSG00000235111	Z97192.3	0.178807	5.91637e-06
ENSG00000236200	KDM4A-AS1	0.231268	6.3334e-06
ENSG00000228302	AL512770.1	0.207826	6.45096e-06
ENSG00000262222	AC133065.2	0.208116	8.80075e-06
ENSG00000258017	AC011603.2	0.208148	9.13159e-06
ENSG00000233844	KCNQ5-IT1	0.162293	1.38946e-05
ENSG00000272599	AC016394.1	0.205448	3.11338e-05
ENSG00000266469	AC005288.1	0.231301	3.70967e-05
ENSG00000237718	AC009095.1	0.260209	4.15422e-05
ENSG00000271870	AC024060.1	0.1933	6.80335e-05
ENSG00000178440	LINC00843	0.232095	7.13649e-05
ENSG00000244332	AL138759.1	0.237825	9.95492e-05
ENSG00000273449	AC093788.1	0.183149	0.000179901
ENSG00000225675	LINC01771	0.172181	0.0004625
ENSG00000259093	AL137191.1	0.153203	0.000587595
ENSG00000224635	AL391095.1	0.179341	0.000648884
ENSG00000236991	EDRF1-AS1	0.225433	0.000796786
ENSG00000254694	AP001893.1	0.223723	0.000879901
ENSG00000232732	AC097717.1	0.234742	0.0012176
ENSG00000257497	AC121761.1	0.133053	0.00155082
ENSG00000188511	C22orf34	0.177467	0.00235358
ENSG00000228382	ITPKB-IT1	0.182088	0.00284598
ENSG00000258378	AL139021.1	0.135892	0.00325594
ENSG00000267758	AC099811.4	0.187545	0.00325594
ENSG00000231177	LINC00852	0.197167	0.00434067
ENSG00000272994	AC012360.3	0.184029	0.00469652
ENSG00000268798	AC027307.3	0.192058	0.00478509
ENSG00000258731	AL356020.1	0.163971	0.00652074
ENSG00000224738	AC099850.1	0.183351	0.00710269
ENSG00000267030	AC011498.2	0.258358	0.0134041
ENSG00000258365	AC073655.2	0.192177	0.0139626
ENSG00000269947	AC135178.5	0.179651	0.016048
ENSG00000270083	AL021878.2	0.240819	0.016048
ENSG00000263235	AC006111.2	0.191538	0.0162024
ENSG00000270141	TERC	0.123393	0.0206586
ENSG00000260773	AC055855.2	0.224278	0.0219745
ENSG00000267150	AC006557.1	0.228668	0.0253532
ENSG00000203362	AL355802.1	0.222457	0.0281057
ENSG00000254300	LINC01111	-0.130981	0.0321177
FDR$: False Discovery Rate determined from meta-analysis tool RobustRankAggreg

## Sheet: Supplementary file 1h
Supplementary file 1h: Meta-analysis derived potential proliferation/growth suppressing lncRNAs.								Mitra et al.
Ensembl ID	Symbol	Average regression coefficients	FDR$
ENSG00000203392	AC105020.1	-0.234948	3.79099e-71
ENSG00000246640	PICART1	-0.233567	4.82679e-63
ENSG00000270504	AL391422.3	-0.233533	2.18821e-55
ENSG00000234869	AL021392.1	-0.218845	3.042e-46
ENSG00000229951	FLJ31356	-0.221444	2.12872e-45
ENSG00000270210	AC104695.2	-0.201299	6.08014e-40
ENSG00000233621	LINC01137	-0.213053	6.34612e-40
ENSG00000266680	AL135905.2	-0.211294	1.11021e-38
ENSG00000254109	RBPMS-AS1	-0.226132	3.05705e-38
ENSG00000231574	LINC02015	-0.199158	9.47796e-37
ENSG00000185186	LINC00313	-0.191287	6.44912e-34
ENSG00000256894	AC022509.3	-0.212602	1.66885e-33
ENSG00000228288	PCAT6	-0.205881	3.91839e-33
ENSG00000238279	BX470102.1	-0.205676	2.57709e-32
ENSG00000227533	SLC2A1-AS1	-0.209844	5.10429e-29
ENSG00000236830	CBR3-AS1	-0.215226	3.74675e-28
ENSG00000233895	AL121761.1	-0.18562	9.32146e-28
ENSG00000224818	AC096677.2	-0.22233	2.35859e-26
ENSG00000272482	AC254633.1	-0.195291	3.83554e-26
ENSG00000270001	AL121894.2	-0.204603	5.68281e-26
ENSG00000235609	AF127577.4	-0.198573	9.56321e-26
ENSG00000204054	LINC00963	-0.211006	1.1584e-25
ENSG00000251603	AC092611.2	-0.212142	1.23525e-24
ENSG00000233901	LINC01503	-0.205919	3.57851e-24
ENSG00000221845	C7orf65	-0.193084	3.57851e-24
ENSG00000257829	AC121757.1	-0.184389	1.49002e-23
ENSG00000223855	HRAT92	-0.186988	2.80219e-23
ENSG00000225511	LINC00475	-0.170891	5.74958e-23
ENSG00000235027	AC068580.3	-0.191263	1.20129e-21
ENSG00000231187	AL356056.2	-0.180734	1.65052e-21
ENSG00000272323	AC026801.3	-0.207064	1.90748e-21
ENSG00000233006	MIR3936HG	-0.196403	2.10444e-21
ENSG00000267919	AC009955.2	-0.183727	2.31812e-21
ENSG00000254680	AC079329.1	-0.187681	2.20983e-20
ENSG00000273033	LINC02035	-0.193807	4.7953e-20
ENSG00000254286	AC083923.2	-0.195175	1.01273e-19
ENSG00000249348	UGDH-AS1	-0.18365	2.81565e-19
ENSG00000260604	AL590004.4	-0.179586	2.81565e-19
ENSG00000250602	AC093535.1	-0.181582	3.42268e-19
ENSG00000231312	AC007388.1	-0.202434	4.53053e-19
ENSG00000261656	BEAN1-AS1	-0.191156	1.38e-18
ENSG00000175147	TMEM51-AS1	-0.190402	4.53369e-18
ENSG00000251562	MALAT1	-0.194223	5.45988e-17
ENSG00000258955	LINC00519	-0.190183	7.91587e-17
ENSG00000265413	AP001094.2	-0.187556	8.82186e-17
ENSG00000268287	AC008687.3	-0.179413	1.62623e-16
ENSG00000266010	GATA6-AS1	-0.203345	1.47847e-15
ENSG00000272582	AL031587.3	-0.179279	1.66158e-15
ENSG00000259498	AC079328.2	-0.177771	1.66158e-15
ENSG00000261888	AC144831.1	-0.170226	2.76865e-15
ENSG00000267519	AC020916.1	-0.23811	2.86312e-15
ENSG00000254333	NDST1-AS1	-0.184937	2.86312e-15
ENSG00000258410	AC087386.1	-0.175774	4.12101e-15
ENSG00000255874	LINC00346	-0.183382	9.49375e-15
ENSG00000268621	IGFL2-AS1	-0.191044	1.09695e-14
ENSG00000236204	LINC01376	-0.186238	1.09695e-14
ENSG00000263680	AC007639.1	-0.195355	1.32481e-14
ENSG00000259345	AC013652.1	-0.183422	1.45885e-14
ENSG00000229109	AL137847.1	-0.177619	1.57463e-14
ENSG00000245532	NEAT1	-0.222756	3.27548e-14
ENSG00000237807	AC022034.2	-0.18208	3.92858e-14
ENSG00000231742	LINC01273	-0.193274	3.98451e-14
ENSG00000253671	AC027117.1	-0.195219	4.60097e-14
ENSG00000188660	LINC00319	-0.170506	5.82842e-14
ENSG00000223975	AP001048.1	-0.170238	6.25938e-14
ENSG00000240875	LINC00886	-0.195687	6.72113e-14
ENSG00000229512	AC068580.1	-0.17463	1.03474e-13
ENSG00000260633	AC010207.1	-0.189316	1.30508e-13
ENSG00000224057	EGFR-AS1	-0.177558	1.30508e-13
ENSG00000260941	LINC00622	-0.190654	1.8159e-13
ENSG00000231160	KLF3-AS1	-0.171659	2.16077e-13
ENSG00000257038	AP002761.3	-0.169406	2.23456e-13
ENSG00000269915	AP006621.4	-0.199483	4.48578e-13
ENSG00000204362	AL590644.1	-0.188217	7.94813e-13
ENSG00000273443	AL645608.9	-0.176217	8.15686e-13
ENSG00000224805	LINC00853	-0.199014	8.4639e-13
ENSG00000267078	AC015802.1	-0.195911	8.96765e-13
ENSG00000244479	OR2A1-AS1	-0.212216	9.11647e-13
ENSG00000257086	AP001453.3	-0.182839	9.11647e-13
ENSG00000241288	AC092902.2	-0.180426	9.11647e-13
ENSG00000259450	AC113146.2	-0.175387	9.11647e-13
ENSG00000272668	AL590560.2	-0.185747	9.32106e-13
ENSG00000230943	LINC02541	-0.18403	1.02903e-12
ENSG00000236548	RNF217-AS1	-0.182794	1.56409e-12
ENSG00000234840	LINC01239	-0.177688	2.13095e-12
ENSG00000268812	AC004264.1	-0.192917	2.47161e-12
ENSG00000267288	AC138150.2	-0.186832	3.47474e-12
ENSG00000261051	AC107021.2	-0.172734	4.05214e-12
ENSG00000185168	LINC00482	-0.179056	7.3197e-12
ENSG00000272953	AC092171.4	-0.183369	8.80575e-12
ENSG00000271324	AC112220.3	-0.173726	9.78883e-12
ENSG00000250303	AP002884.3	-0.17338	1.24061e-11
ENSG00000224596	ZMIZ1-AS1	-0.173797	1.55713e-11
ENSG00000258711	AL358334.2	-0.192731	3.60481e-11
ENSG00000271133	AC004130.1	-0.191497	3.95875e-11
ENSG00000272824	AC245100.7	-0.181851	4.53429e-11
ENSG00000234546	LINC01759/GUARDIN	-0.191232	4.87531e-11
ENSG00000267892	AC022144.1	-0.176066	7.29639e-11
ENSG00000260118	AL157700.1	-0.184866	7.90928e-11
ENSG00000273113	AC133528.1	-0.172749	1.02832e-10
ENSG00000272695	GAS6-AS2	-0.169294	1.60243e-10
ENSG00000260989	AL133297.2	-0.168716	1.60243e-10
ENSG00000186056	MATN1-AS1	-0.192946	3.24337e-10
ENSG00000225506	CYP4A22-AS1	-0.186038	3.2903e-10
ENSG00000262903	AC027796.4	-0.15277	5.55395e-10
ENSG00000272088	AL512413.1	-0.179573	5.95829e-10
ENSG00000271327	AC010201.2	-0.175164	1.38361e-09
ENSG00000235385	LINC02154	-0.186257	2.32283e-09
ENSG00000228917	AL591806.1	-0.188639	2.45094e-09
ENSG00000227192	AL023581.2	-0.165762	2.56196e-09
ENSG00000244041	LINC01011	-0.163896	2.64515e-09
ENSG00000233237	LINC00472	-0.174993	2.86917e-09
ENSG00000243902	ELFN2	-0.146519	4.60156e-09
ENSG00000230479	AP000695.1	-0.174678	6.00933e-09
ENSG00000235865	GSN-AS1	-0.153113	6.96966e-09
ENSG00000259146	AC005476.2	-0.170617	9.45169e-09
ENSG00000268460	AC006262.1	-0.184304	1.0973e-08
ENSG00000273305	AC009237.15	-0.177535	1.23948e-08
ENSG00000260077	AC104794.2	-0.165033	1.7735e-08
ENSG00000240006	LINC02004	-0.181053	2.11164e-08
ENSG00000226026	AC092802.1	-0.183952	2.51371e-08
ENSG00000267082	AC011472.1	-0.17385	3.21356e-08
ENSG00000197182	MIRLET7BHG	-0.164225	4.06796e-08
ENSG00000214708	AC116407.1	-0.166349	4.8038e-08
ENSG00000272944	AC079834.2	-0.169661	5.01046e-08
ENSG00000232679	LINC01705	-0.192782	5.2184e-08
ENSG00000257443	AC068305.3	-0.169389	5.63182e-08
ENSG00000236384	LINC00479	-0.189276	6.86491e-08
ENSG00000232774	FLJ22447	-0.161778	7.88451e-08
ENSG00000233539	AC011294.1	-0.184545	8.11136e-08
ENSG00000259370	AC103740.1	-0.147594	8.42913e-08
ENSG00000272341	AL137003.2	-0.174671	8.51378e-08
ENSG00000253944	AC027117.2	-0.172361	9.28351e-08
ENSG00000232536	AL365436.2	-0.179963	1.50983e-07
ENSG00000251179	TMEM92-AS1	-0.168452	1.64101e-07
ENSG00000240032	LNCSRLR	-0.172839	1.91624e-07
ENSG00000235770	LINC00607	-0.180035	2.0725e-07
ENSG00000250608	AC010210.1	-0.185966	2.19967e-07
ENSG00000232453	AC105277.1	-0.18224	2.24892e-07
ENSG00000270179	AP002840.2	-0.176852	2.88306e-07
ENSG00000255345	AP002957.1	-0.16138	3.40681e-07
ENSG00000272081	AC008972.2	-0.177184	3.72489e-07
ENSG00000231948	HS1BP3-IT1	-0.163485	3.72489e-07
ENSG00000235790	AC114488.2	-0.166526	3.7623e-07
ENSG00000228526	MIR34AHG	-0.187802	3.96622e-07
ENSG00000227199	ST7-AS1	-0.179363	4.00274e-07
ENSG00000233818	AP000695.2	-0.172332	4.38788e-07
ENSG00000253552	HOXA-AS2	-0.166128	4.51841e-07
ENSG00000227210	AC079145.1	-0.164669	4.51841e-07
ENSG00000224897	POT1-AS1	-0.183993	7.26947e-07
ENSG00000269895	AP000654.1	-0.148643	1.23985e-06
ENSG00000227482	AL157702.2	-0.151478	1.27931e-06
ENSG00000255306	AC004923.4	-0.162928	1.39944e-06
ENSG00000223685	LINC00571	-0.164435	2.30664e-06
ENSG00000253102	AC004707.1	-0.187889	4.47813e-06
ENSG00000267922	AC007785.1	-0.164773	4.5224e-06
ENSG00000253438	PCAT1	-0.166488	5.9292e-06
ENSG00000235947	EGOT	-0.178717	6.69751e-06
ENSG00000234899	SOX9-AS1	-0.1657	6.69751e-06
ENSG00000233077	LINC01271	-0.181089	6.88648e-06
ENSG00000268108	AC008687.2	-0.162197	7.10715e-06
ENSG00000248787	AC092903.2	-0.18086	7.39309e-06
ENSG00000214145	LINC00887	-0.158581	7.39309e-06
ENSG00000223829	AC004870.2	-0.169981	7.44048e-06
ENSG00000225764	P3H2-AS1	-0.168978	9.11535e-06
ENSG00000269976	AC012065.3	-0.168223	9.49119e-06
ENSG00000187185	AC092118.1	-0.184235	1.07134e-05
ENSG00000258789	AL162171.1	-0.177403	1.18112e-05
ENSG00000260032	NORAD	-0.171711	1.18112e-05
ENSG00000261068	AL512274.1	-0.194079	1.26714e-05
ENSG00000251432	AC108062.1	-0.177329	1.49289e-05
ENSG00000267052	AC005050.1	-0.156937	1.67276e-05
ENSG00000255471	AP001528.2	-0.176074	1.72162e-05
ENSG00000254837	AP001372.2	-0.175747	1.98145e-05
ENSG00000257859	CASC18	-0.17646	2.04043e-05
ENSG00000260160	AC011468.1	-0.178102	2.54888e-05
ENSG00000260911	AC135050.3	-0.168502	2.91409e-05
ENSG00000250786	SNHG18	-0.163259	2.97488e-05
ENSG00000230939	AL591475.1	-0.177474	3.24955e-05
ENSG00000272913	AC009237.14	-0.161508	3.82916e-05
ENSG00000226332	AL354836.1	-0.187785	4.78e-05
ENSG00000271259	AC010201.1	-0.15969	6.10231e-05
ENSG00000261334	AL353803.4	-0.151264	7.96197e-05
ENSG00000266903	AC243964.2	-0.183827	8.61437e-05
ENSG00000205488	CALML3-AS1	-0.17171	8.61437e-05
ENSG00000263718	SEPTIN9-DT	-0.168227	8.94229e-05
ENSG00000198221	AFDN-AS1	-0.177363	9.06887e-05
ENSG00000247317	AC105202.1	-0.182871	9.69773e-05
ENSG00000229931	AL137003.1	-0.166134	9.69773e-05
ENSG00000272950	AC093799.2	-0.155117	0.000127501
ENSG00000231324	AP000696.1	-0.151899	0.000133987
ENSG00000229017	LINC01277	-0.160228	0.000134321
ENSG00000266970	AC061992.1	-0.183628	0.000143975
ENSG00000244541	LINC01213	-0.175839	0.000152026
ENSG00000234807	LINC01135	-0.15166	0.000160201
ENSG00000244198	AC004889.1	-0.177485	0.000163048
ENSG00000260641	AC114811.2	-0.151835	0.000189017
ENSG00000258457	AL132780.2	-0.161512	0.00022673
ENSG00000225330	AF064860.1	-0.142916	0.000259925
ENSG00000248429	FAM198B-AS1	-0.173582	0.000310615
ENSG00000248727	LINC01948	-0.156354	0.000316112
ENSG00000231713	AF064860.2	-0.152548	0.000335482
ENSG00000255100	AP003119.2	-0.176797	0.000361132
ENSG00000224409	AC114489.1	-0.179705	0.000379903
ENSG00000225302	AC023283.1	-0.180089	0.000390705
ENSG00000224116	INHBA-AS1	-0.154229	0.000428857
ENSG00000250509	AC034213.1	-0.20131	0.000497487
ENSG00000228812	LAMA5-AS1	-0.160742	0.000498408
ENSG00000254554	AC080023.1	-0.153794	0.00063265
ENSG00000253227	AC090192.2	-0.161565	0.000637749
ENSG00000273123	AC020634.1	-0.142989	0.000657615
ENSG00000259354	AC025580.2	-0.172803	0.000669309
ENSG00000236064	AL034399.2	-0.158969	0.000772955
ENSG00000229647	MYOSLID	-0.159669	0.000838887
ENSG00000146666	LINC00525	-0.169068	0.000948456
ENSG00000226386	PARD3-AS1	-0.160307	0.000952649
ENSG00000233030	AC243772.2	-0.163105	0.00119795
ENSG00000272138	LINC01607	-0.154768	0.00121836
ENSG00000236039	AC019117.1	-0.174245	0.00144594
ENSG00000270557	AC013731.1	-0.169655	0.00162435
ENSG00000228791	THRB-AS1	-0.182008	0.00167165
ENSG00000215244	AL137145.2	-0.168431	0.00177118
ENSG00000238290	AL034417.2	-0.157859	0.00202215
ENSG00000272715	AL157904.1	-0.161009	0.00223827
ENSG00000259976	AC093010.3	-0.166922	0.00276034
ENSG00000261105	LMO7-AS1	-0.143472	0.00317683
ENSG00000258279	LINC00592	-0.161326	0.00324164
ENSG00000271344	AC018638.6	-0.169056	0.00327124
ENSG00000242861	AL591895.1	-0.187493	0.00332189
ENSG00000258793	AL355102.4	-0.156196	0.00357166
ENSG00000265519	AC015922.3	-0.18006	0.0039781
ENSG00000251396	LINC01301	-0.158209	0.0039781
ENSG00000236318	AC019117.2	-0.165295	0.00522819
ENSG00000249852	AC145676.1	-0.14186	0.00561814
ENSG00000259605	AC074212.1	-0.151912	0.00684116
ENSG00000257671	KRT7-AS	-0.172966	0.00696854
ENSG00000212743	AL137145.1	-0.170338	0.00752647
ENSG00000259604	AC015712.4	-0.168411	0.00902942
ENSG00000245573	BDNF-AS	-0.153958	0.00902942
ENSG00000254847	AC009806.1	-0.151755	0.00902942
ENSG00000237512	UNC5B-AS1	-0.164146	0.0114189
ENSG00000259275	AC087477.2	-0.146712	0.0116677
ENSG00000259005	AC005479.2	-0.135316	0.0130094
ENSG00000260971	AC119674.1	-0.160989	0.0171748
ENSG00000233393	AP000688.2	-0.164075	0.0191279
ENSG00000272512	AL645608.8	-0.174382	0.0223269
ENSG00000266258	LINC01909	-0.168178	0.0241985
ENSG00000249180	AC020900.1	-0.139309	0.0246435
ENSG00000214922	HLA-F-AS1	-0.163272	0.0252708
ENSG00000231969	AC007364.1	-0.137195	0.0292842
ENSG00000231367	AC011247.1	-0.155042	0.0332256
ENSG00000257298	AC008147.2	-0.138944	0.0356589
FDR$: False Discovery Rate determined from meta-analysis tool RobustRankAggreg

## Sheet: Supplementary file 1i
Supplementary file 1i: Number of pubmed hits for individual lncRNAs. Pubmed was searched on September 11, 2021.												Mitra et al.
lncRNA	PubMed ID
AC105020.1	0
AL391422.3	0
AL021392.1	0
FLJ31356	0
AC104695.2	0
AL135905.2	0
AC022509.3	0
BX470102.1	0
AL121761.1	0
AF127577.4	0
AC096677.2	0
AC254633.1	0
AL121894.2	0
AC092611.2	0
AC121757.1	0
HRAT92	0
AL356056.2	0
MIR3936HG	0
AC026801.3	0
AC009955.2	0
LINC02035	0
AC079329.1	0
AC093535.1	0
AC083923.2	0
AC007388.1	0
AL590004.4	0
BEAN1-AS1	0
AP001094.2	0
AL031587.3	0
AC008687.3	0
AC020916.1	0
LINC01376	0
AC144831.1	0
NDST1-AS1	0
AC087386.1	0
AC022034.2	0
AP001048.1	0
AL137847.1	0
AC013652.1	0
AC007639.1	0
AC010207.1	0
AC027117.1	0
LINC01273	0
AC068580.1	0
AP006621.4	0
AC113146.2	0
LINC00622	0
AL590560.2	0
AL590644.1	0
AP002761.3	0
AC138150.2	0
AC092902.2	0
AP001453.3	0
AL645608.9	0
AC107021.2	0
AC015802.1	0
LINC02541	0
AC004264.1	0
AC112220.3	0
AP002884.3	0
AL358334.2	0
AC004130.1	0
AC245100.7	0
AC133528.1	0
AC022144.1	0
AL157700.1	0
AL512413.1	0
AL133297.2	0
AC010201.2	0
AL023581.2	0
AC006262.1	0
AC009237.15	0
AL591806.1	0
AC092802.1	0
AC005476.2	0
AC104794.2	0
LINC00479	0
AC103740.1	0
AL137003.2	0
AC011472.1	0
LINC02004	0
AC068305.3	0
AC010210.1	0
AC011294.1	0
AC114488.2	0
AL365436.2	0
POT1-AS1	0
AP002840.2	0
AP002957.1	0
AP000654.1	0
AC004923.4	0
HS1BP3-IT1	0
AC079145.1	0
AC008972.2	0
AL157702.2	0
AC008687.2	0
AC012065.3	0
AC004870.2	0
AC092118.1	0
AC007785.1	0
AC004707.1	0
AC108062.1	0
AC005050.1	0
AP001372.2	0
AC135050.3	0
AC092903.2	0
AL591475.1	0
AL162171.1	0
P3H2-AS1	0
AP001528.2	0
AC010201.1	0
AL353803.4	0
AFDN-AS1	0
AC093799.2	0
LINC01135	0
LINC01277	0
AC114811.2	0
AC243964.2	0
AC105202.1	0
AL137003.1	0
AC114489.1	0
AC004889.1	0
AF064860.1	0
AC080023.1	0
AL132780.2	0
AL034399.2	0
AC020634.1	0
LINC01948	0
AF064860.2	0
AC025580.2	0
FAM198B-AS1	0
AC023283.1	0
AP003119.2	0
AC243772.2	0
AC019117.1	0
AC013731.1	0
THRB-AS1	0
AL157904.1	0
AC034213.1	0
AL034417.2	0
AC090192.2	0
AL137145.2	0
PARD3-AS1	0
LINC01607	0
AC093010.3	0
AC018638.6	0
LINC01301	0
AC145676.1	0
AC074212.1	0
AC015712.4	0
AL137145.1	0
AC087477.2	0
AC019117.2	0
AC015922.3	0
AC119674.1	0
AP000688.2	0
AL645608.8	0
AC009806.1	0
LINC01909	0
AC020900.1	0
AC008147.2	0
AC007364.1	0
AC011247.1	0
AL513165.1	0
AC010761.1	0
AL138724.1	0
AC012073.1	0
AP003392.4	0
RNASEH1-AS1	0
AC002116.2	0
AL391069.3	0
AC097461.1	0
AC097460.1	0
AL136172.1	0
AL133215.2	0
AL662797.3	0
AL355483.2	0
AC011466.3	0
AL355483.3	0
AP002449.1	0
AL355488.1	0
AC027097.1	0
AC046130.1	0
AC008438.1	0
AC011498.3	0
AC002310.2	0
AC017104.3	0
Z94721.1	0
AC023355.1	0
AL121658.1	0
AC009121.1	0
AC027627.1	0
AC005670.1	0
CSTF3-AS1	0
AC019069.1	0
AL359397.1	0
AC021188.1	0
AC073529.1	0
AL354864.1	0
AC084757.2	0
AC133065.4	0
AC008434.1	0
AC020908.1	0
AC006557.3	0
SNHG21	0
AC009137.2	0
AC007250.1	0
AL359198.1	0
AL138921.2	0
AL355802.3	0
AL132780.1	0
AC078778.2	0
AC012146.1	0
AC022405.1	0
AC092718.2	0
AC090181.2	0
Z97192.3	0
LINC01337	0
AC011603.2	0
AC145098.1	0
KCNQ5-IT1	0
AC133065.2	0
AC008982.2	0
AL512770.1	0
AC016394.1	0
AC005288.1	0
AC009095.1	0
AL138759.1	0
AL137191.1	0
AL391095.1	0
AC093788.1	0
LINC01771	0
AC121761.1	0
ITPKB-IT1	0
AL139021.1	0
AP001893.1	0
AC097717.1	0
EDRF1-AS1	0
AC027307.3	0
AC012360.3	0
AL356020.1	0
AC099850.1	0
AC099811.4	0
AC006111.2	0
AL355802.1	0
AC011498.2	0
AL021878.2	0
AC073655.2	0
AC055855.2	0
AC006557.1	0
AC005479.2	1
AC011468.1	1
AC027117.2	1
AC027796.4	1
AC068580.3	1
SEPTIN9-DT	1
AC079328.2	1
AC079834.2	1
AC091057.3	1
AC092718.4	1
AC105277.1	1
AC116407.1	1
AC135178.5	1
AC145207.5	1
AL354836.1	1
AL355102.4	1
AL512274.1	1
AL591895.1	1
AP000695.1	1
AP000695.2	1
AP000696.1	1
C22orf34	1
C7orf65	1
DEPDC1-AS1	1
FLJ22447	1
KDM4A-AS1	1
LINC00482	1
LINC00571	1
LINC00843	1
LINC00853	1
LINC00886	1
LINC01239	1
LINC02015	1
MATN1-AS1	1
MIR34AHG	1
OR2A1-AS1	1
RNF217-AS1	1
UBL7-AS1	1
UGDH-AS1	1
AC009237.14	2
AC024060.1	2
AC061992.1	2
AC092171.4	2
CASC18	2
CYP4A22-AS1	2
ENTPD1-AS1	2
GSN-AS1	2
KLF3-AS1	2
LAMA5-AS1	2
LINC00592	2
LINC00607	2
LINC00618	2
LINC01011	2
LINC01111	2
LINC01213	2
LINC01271	2
LINC01705	2
LINC02154	2
LMO7-AS1	2
LNCSRLR	2
RBPMS-AS1	2
SLC2A1-AS1	2
SNHG19	2
SNHG25	2
SOX9-AS1	2
TMEM51-AS1	2
TMEM92-AS1	2
LINC01759/GUARDIN	3
CALML3-AS1	3
INHBA-AS1	3
LINC01137	3
MIRLET7BHG	3
MYOSLID	3
USP2-AS1	3
ZMIZ1-AS1	3
ELFN2	4
KRT7-AS	4
LINC00519	4
LINC00475	5
LINC00887	5
CBR3-AS1	6
HLA-F-AS1	6
LINC00852	6
PICART1	6
AC099850.3	7
GAS6-AS2	7
IGFL2-AS1	7
SNHG18	7
LINC00313	8
PXN-AS1	8
ST7-AS1	8
UNC5B-AS1	8
LINC00525	9
C2orf48	10
GATA6-AS1	10
VPS9D1-AS1	10
SNHG10	13
EGOT	14
FOXP4-AS1	15
EGFR-AS1	16
LINC00319	16
LINC01503	20
LINC00963	27
LINC00346	30
LINC00472	30
SNHG17	35
PCAT6	42
TMPO-AS1	42
BDNF-AS	43
HOXA-AS2	46
SNHG15	53
DLEU1	56
SNHG3	61
PCAT1	63
SNHG5	63
DLEU2	75
NORAD	84
SNHG7	86
SNHG16	119
DANCR	120
SNHG1	142
MIR17HG	156
NEAT1	453
MALAT1	929
TERC	997

## Sheet: Supplementary file 1j
Supplementary file 1j: lncRNAs that have more than two fold expression change in one or more cancer types.											Mitra et al.
Ensembl ID	Symbol	Number of RNA-seq data showing >2-fold
		alteration	down-regulation	up-regulation
ENSG00000178440	LINC00843	1	1	0
ENSG00000187185	AC092118.1	1	0	1
ENSG00000188511	C22orf34	1	1	0
ENSG00000197182	MIRLET7BHG	1	0	1
ENSG00000214145	LINC00887	1	0	1
ENSG00000215417	MIR17HG	1	1	0
ENSG00000224057	EGFR-AS1	1	0	1
ENSG00000224409	AC114489.1	1	0	1
ENSG00000224805	LINC00853	1	0	1
ENSG00000225163	LINC00618	1	1	0
ENSG00000225302	AC023283.1	1	1	0
ENSG00000225506	CYP4A22-AS1	1	0	1
ENSG00000225675	LINC01771	1	1	0
ENSG00000226026	AC092802.1	1	0	1
ENSG00000226688	ENTPD1-AS1	1	1	0
ENSG00000227192	AL023581.2	1	0	1
ENSG00000227210	AC079145.1	1	1	0
ENSG00000227482	AL157702.2	1	0	1
ENSG00000228917	AL591806.1	1	0	1
ENSG00000229109	AL137847.1	1	0	1
ENSG00000230747	AC021188.1	1	1	0
ENSG00000230939	AL591475.1	1	0	1
ENSG00000231160	KLF3-AS1	1	0	1
ENSG00000231177	LINC00852	1	1	0
ENSG00000231324	AP000696.1	1	0	1
ENSG00000231948	HS1BP3-IT1	1	0	1
ENSG00000232536	AL365436.2	1	0	1
ENSG00000233016	SNHG7	1	0	1
ENSG00000233077	LINC01271	1	1	0
ENSG00000233393	AP000688.2	1	1	0
ENSG00000233539	AC011294.1	1	0	1
ENSG00000233818	AP000695.2	1	1	0
ENSG00000235027	AC068580.3	1	0	1
ENSG00000235947	EGOT	1	0	1
ENSG00000236064	AL034399.2	1	0	1
ENSG00000236991	EDRF1-AS1	1	0	1
ENSG00000238279	BX470102.1	1	0	1
ENSG00000240006	LINC02004	1	0	1
ENSG00000243902	ELFN2	1	0	1
ENSG00000245573	BDNF-AS	1	0	1
ENSG00000247151	CSTF3-AS1	1	0	1
ENSG00000248727	LINC01948	1	0	1
ENSG00000249180	AC020900.1	1	0	1
ENSG00000249637	AC008438.1	1	0	1
ENSG00000250303	AP002884.3	1	0	1
ENSG00000250509	AC034213.1	1	1	0
ENSG00000250988	SNHG21	1	1	0
ENSG00000254109	RBPMS-AS1	1	0	1
ENSG00000254300	LINC01111	1	0	1
ENSG00000254680	AC079329.1	1	0	1
ENSG00000257038	AP002761.3	1	0	1
ENSG00000257859	CASC18	1	0	1
ENSG00000258365	AC073655.2	1	1	0
ENSG00000258731	AL356020.1	1	0	1
ENSG00000258857	AL359397.1	1	1	0
ENSG00000258955	LINC00519	1	1	0
ENSG00000259254	AC022405.1	1	1	0
ENSG00000259354	AC025580.2	1	0	1
ENSG00000259604	AC015712.4	1	1	0
ENSG00000259605	AC074212.1	1	1	0
ENSG00000260032	NORAD	1	1	0
ENSG00000260911	AC135050.3	1	0	1
ENSG00000261105	LMO7-AS1	1	0	1
ENSG00000261373	VPS9D1-AS1	1	1	0
ENSG00000261886	AC005670.1	1	1	0
ENSG00000262222	AC133065.2	1	1	0
ENSG00000263013	AC133065.4	1	1	0
ENSG00000263731	AC145207.5	1	0	1
ENSG00000264577	AC010761.1	1	0	1
ENSG00000265519	AC015922.3	1	1	0
ENSG00000266402	SNHG25	1	0	1
ENSG00000266969	AP002449.1	1	0	1
ENSG00000267040	AC027097.1	1	0	1
ENSG00000267082	AC011472.1	1	1	0
ENSG00000267150	AC006557.1	1	1	0
ENSG00000267356	AC006557.3	1	0	1
ENSG00000267758	AC099811.4	1	0	1
ENSG00000267922	AC007785.1	1	0	1
ENSG00000268798	AC027307.3	1	1	0
ENSG00000269688	AC008982.2	1	1	0
ENSG00000269895	AP000654.1	1	0	1
ENSG00000270083	AL021878.2	1	0	1
ENSG00000270141	TERC	1	0	1
ENSG00000271327	AC010201.2	1	0	1
ENSG00000271870	AC024060.1	1	0	1
ENSG00000272512	AL645608.8	1	1	0
ENSG00000272582	AL031587.3	1	0	1
ENSG00000272599	AC016394.1	1	0	1
ENSG00000272824	AC245100.7	1	1	0
ENSG00000272913	AC009237.14	1	0	1
ENSG00000272950	AC093799.2	1	1	0
ENSG00000272953	AC092171.4	1	1	0
ENSG00000273033	LINC02035	1	0	1
ENSG00000273305	AC009237.15	1	0	1
ENSG00000185168	LINC00482	2	0	2
ENSG00000203392	AC105020.1	2	1	1
ENSG00000203875	SNHG5	2	2	0
ENSG00000212743	AL137145.1	2	1	1
ENSG00000215244	AL137145.2	2	0	2
ENSG00000224596	ZMIZ1-AS1	2	0	2
ENSG00000226332	AL354836.1	2	0	2
ENSG00000226386	PARD3-AS1	2	0	2
ENSG00000226950	DANCR	2	0	2
ENSG00000228838	AL355483.2	2	2	0
ENSG00000229017	LINC01277	2	0	2
ENSG00000231742	LINC01273	2	0	2
ENSG00000231969	AC007364.1	2	0	2
ENSG00000233895	AL121761.1	2	0	2
ENSG00000234327	AC012146.1	2	1	1
ENSG00000235385	LINC02154	2	0	2
ENSG00000235790	AC114488.2	2	2	0
ENSG00000235865	GSN-AS1	2	1	1
ENSG00000236308	AL138921.2	2	1	1
ENSG00000237718	AC009095.1	2	2	0
ENSG00000242125	SNHG3	2	2	0
ENSG00000244479	OR2A1-AS1	2	1	1
ENSG00000245322	AC097460.1	2	1	1
ENSG00000248996	AC145098.1	2	1	1
ENSG00000249655	AC008434.1	2	2	0
ENSG00000251221	LINC01337	2	0	2
ENSG00000253102	AC004707.1	2	0	2
ENSG00000253227	AC090192.2	2	1	1
ENSG00000253552	HOXA-AS2	2	2	0
ENSG00000253944	AC027117.2	2	0	2
ENSG00000254333	NDST1-AS1	2	0	2
ENSG00000254837	AP001372.2	2	2	0
ENSG00000254847	AC009806.1	2	0	2
ENSG00000255306	AC004923.4	2	1	1
ENSG00000257298	AC008147.2	2	0	2
ENSG00000257497	AC121761.1	2	1	1
ENSG00000258789	AL162171.1	2	1	1
ENSG00000259005	AC005479.2	2	1	1
ENSG00000259498	AC079328.2	2	1	1
ENSG00000261334	AL353803.4	2	0	2
ENSG00000262703	AC009121.1	2	2	0
ENSG00000263235	AC006111.2	2	0	2
ENSG00000266469	AC005288.1	2	1	1
ENSG00000267078	AC015802.1	2	0	2
ENSG00000267519	AC020916.1	2	0	2
ENSG00000267919	AC009955.2	2	0	2
ENSG00000269846	AL136172.1	2	2	0
ENSG00000270179	AP002840.2	2	0	2
ENSG00000270210	AC104695.2	2	1	1
ENSG00000271133	AC004130.1	2	0	2
ENSG00000271259	AC010201.1	2	1	1
ENSG00000271324	AC112220.3	2	0	2
ENSG00000271344	AC018638.6	2	0	2
ENSG00000272088	AL512413.1	2	0	2
ENSG00000272668	AL590560.2	2	0	2
ENSG00000272716	AL121658.1	2	1	1
ENSG00000272994	AC012360.3	2	1	1
ENSG00000273443	AL645608.9	2	1	1
ENSG00000175147	TMEM51-AS1	3	0	3
ENSG00000176124	DLEU1	3	3	0
ENSG00000185186	LINC00313	3	0	3
ENSG00000188660	LINC00319	3	0	3
ENSG00000224635	AL391095.1	3	0	3
ENSG00000224897	POT1-AS1	3	2	1
ENSG00000227199	ST7-AS1	3	3	0
ENSG00000227598	Z94721.1	3	2	1
ENSG00000229512	AC068580.1	3	0	3
ENSG00000229647	MYOSLID	3	0	3
ENSG00000229931	AL137003.1	3	0	3
ENSG00000229951	FLJ31356	3	0	3
ENSG00000230479	AP000695.1	3	1	2
ENSG00000231312	AC007388.1	3	0	3
ENSG00000231574	LINC02015	3	1	2
ENSG00000231607	DLEU2	3	3	0
ENSG00000232732	AC097717.1	3	3	0
ENSG00000233030	AC243772.2	3	1	2
ENSG00000234160	AL513165.1	3	1	2
ENSG00000234171	RNASEH1-AS1	3	3	0
ENSG00000237807	AC022034.2	3	0	3
ENSG00000240875	LINC00886	3	1	2
ENSG00000242861	AL591895.1	3	0	3
ENSG00000244541	LINC01213	3	0	3
ENSG00000248787	AC092903.2	3	0	3
ENSG00000251396	LINC01301	3	0	3
ENSG00000251562	MALAT1	3	0	3
ENSG00000253438	PCAT1	3	0	3
ENSG00000254286	AC083923.2	3	0	3
ENSG00000254554	AC080023.1	3	1	2
ENSG00000254694	AP001893.1	3	2	1
ENSG00000255345	AP002957.1	3	1	2
ENSG00000255717	SNHG1	3	3	0
ENSG00000256894	AC022509.3	3	2	1
ENSG00000257285	AL132780.1	3	3	0
ENSG00000259146	AC005476.2	3	1	2
ENSG00000259370	AC103740.1	3	0	3
ENSG00000259488	AC023355.1	3	3	0
ENSG00000259976	AC093010.3	3	0	3
ENSG00000260213	AC092718.2	3	1	2
ENSG00000260633	AC010207.1	3	2	1
ENSG00000261068	AL512274.1	3	0	3
ENSG00000261428	AC097461.1	3	1	2
ENSG00000266010	GATA6-AS1	3	0	3
ENSG00000266801	AC009137.2	3	2	1
ENSG00000266903	AC243964.2	3	0	3
ENSG00000267892	AC022144.1	3	0	3
ENSG00000269915	AP006621.4	3	0	3
ENSG00000269951	AC090181.2	3	1	2
ENSG00000269976	AC012065.3	3	0	3
ENSG00000270504	AL391422.3	3	2	1
ENSG00000270557	AC013731.1	3	0	3
ENSG00000271754	AL355802.3	3	1	2
ENSG00000272138	LINC01607	3	0	3
ENSG00000272269	AL138724.1	3	1	2
ENSG00000272711	AC019069.1	3	2	1
ENSG00000272944	AC079834.2	3	1	2
ENSG00000273063	AC007250.1	3	3	0
ENSG00000163009	C2orf48	4	4	0
ENSG00000186056	MATN1-AS1	4	0	4
ENSG00000204054	LINC00963	4	1	3
ENSG00000204362	AL590644.1	4	0	4
ENSG00000214922	HLA-F-AS1	4	1	3
ENSG00000223685	LINC00571	4	0	4
ENSG00000224116	INHBA-AS1	4	0	4
ENSG00000227963	AL355488.1	4	3	1
ENSG00000228288	PCAT6	4	1	3
ENSG00000231187	AL356056.2	4	0	4
ENSG00000232774	FLJ22447	4	0	4
ENSG00000233006	MIR3936HG	4	1	3
ENSG00000233621	LINC01137	4	1	3
ENSG00000233901	LINC01503	4	0	4
ENSG00000234753	FOXP4-AS1	4	4	0
ENSG00000235609	AF127577.4	4	3	1
ENSG00000237976	AL391069.3	4	0	4
ENSG00000238290	AL034417.2	4	1	3
ENSG00000239791	AC002310.2	4	4	0
ENSG00000244041	LINC01011	4	3	1
ENSG00000244198	AC004889.1	4	3	1
ENSG00000245248	USP2-AS1	4	4	0
ENSG00000247240	UBL7-AS1	4	4	0
ENSG00000247317	AC105202.1	4	1	3
ENSG00000251179	TMEM92-AS1	4	0	4
ENSG00000255121	AP003392.4	4	3	1
ENSG00000255471	AP001528.2	4	1	3
ENSG00000257086	AP001453.3	4	0	4
ENSG00000257829	AC121757.1	4	2	2
ENSG00000258279	LINC00592	4	0	4
ENSG00000259450	AC113146.2	4	1	3
ENSG00000259469	AC084757.2	4	1	3
ENSG00000260118	AL157700.1	4	2	2
ENSG00000260641	AC114811.2	4	0	4
ENSG00000260971	AC119674.1	4	3	1
ENSG00000261051	AC107021.2	4	2	2
ENSG00000265415	AC099850.3	4	4	0
ENSG00000266970	AC061992.1	4	0	4
ENSG00000267030	AC011498.2	4	3	1
ENSG00000267288	AC138150.2	4	1	3
ENSG00000268287	AC008687.3	4	0	4
ENSG00000272341	AL137003.2	4	1	3
ENSG00000272482	AC254633.1	4	0	4
ENSG00000272540	AL662797.3	4	4	0
ENSG00000272695	GAS6-AS2	4	0	4
ENSG00000273162	AL133215.2	4	4	0
ENSG00000205488	CALML3-AS1	5	2	3
ENSG00000214708	AC116407.1	5	0	5
ENSG00000224738	AC099850.1	5	4	1
ENSG00000227533	SLC2A1-AS1	5	1	4
ENSG00000234129	AC073529.1	5	4	1
ENSG00000234264	DEPDC1-AS1	5	4	1
ENSG00000234869	AL021392.1	5	1	4
ENSG00000236830	CBR3-AS1	5	2	3
ENSG00000241288	AC092902.2	5	1	4
ENSG00000244332	AL138759.1	5	4	1
ENSG00000245532	NEAT1	5	0	5
ENSG00000255100	AP003119.2	5	2	3
ENSG00000255874	LINC00346	5	1	4
ENSG00000257671	KRT7-AS	5	0	5
ENSG00000260077	AC104794.2	5	2	3
ENSG00000261061	AC092718.4	5	5	0
ENSG00000265413	AP001094.2	5	2	3
ENSG00000268108	AC008687.2	5	0	5
ENSG00000268621	IGFL2-AS1	5	0	5
ENSG00000270001	AL121894.2	5	1	4
ENSG00000271936	AC012073.1	5	5	0
ENSG00000272323	AC026801.3	5	1	4
ENSG00000272817	AL359198.1	5	3	2
ENSG00000273113	AC133528.1	5	2	3
ENSG00000198221	AFDN-AS1	6	3	3
ENSG00000203362	AL355802.1	6	0	6
ENSG00000251432	AC108062.1	6	1	5
ENSG00000257167	TMPO-AS1	6	6	0
ENSG00000258017	AC011603.2	6	6	0
ENSG00000258457	AL132780.2	6	1	5
ENSG00000260604	AL590004.4	6	1	5
ENSG00000260941	LINC00622	6	1	5
ENSG00000261888	AC144831.1	6	2	4
ENSG00000267698	AC002116.2	6	6	0
ENSG00000268460	AC006262.1	6	0	6
ENSG00000269974	AC091057.3	6	6	0
ENSG00000223855	HRAT92	7	0	7
ENSG00000236548	RNF217-AS1	7	3	4
ENSG00000246640	PICART1	7	0	7
ENSG00000262903	AC027796.4	7	0	7
ENSG00000263718	SEPTIN9-DT	7	1	6
ENSG00000224818	AC096677.2	8	2	6
ENSG00000236204	LINC01376	8	1	7
ENSG00000272081	AC008972.2	8	0	8
ENSG00000248429	FAM198B-AS1	9	0	9
ENSG00000266680	AL135905.2	11	0	11
ENSG00000268812	AC004264.1	11	0	11
ENSG00000225511	LINC00475	12	0	12
ENSG00000234546	LINC01759/GUARDIN	12	0	12
ENSG00000228526	MIR34AHG	14	0	14
ENSG00000237512	UNC5B-AS1	14	0	14

[truncated: 3 more sheets: Supplementary file 1k, Supplementary file 1l, Sheet1]
